# Supplementary material for: Genome sequencing ofC. elegansbalancer strains reveals previously unappreciated complex genomic rearrangements
Source: HighWire-hosted journal article supplement (doi:10.1101/gr.276988.122), 2022-12-05
Supplement: Supplemental_Tables.xlsx [file Supplemental_Tables.xlsx]

## Sheet: Supplemental_Table_S1
List of strains mentioned in the study
Type	Strain	WormBase ID	Mutagen	Outcrossed	Received at CGC	Genotype	Reference	Comment
Strains sequenced in this study
Traditional balancers strains	BC1217	WBStrain00000509	Gamma rays		1987	sDf22/nT1 IV; +/nT1 V	The Genetic Toolkit is funded by the NIH National Center for Research Resources (NCRR) (USA) to Ann M. Rose, David L. Baillie, and Donald L. Riddle.
	CB3475	WBStrain00004489	EMS		1984	mcm-4(e1466)/szT1 [lon-2(e678)] I; +/szT1 X.
	CB4281	WBStrain00004547	EMS		1994	+/eT1 III; eDf43 dpy-11(e224)/eT1 V.
	CZ1072	WBStrain00005359	Phosphorus-32		2003	unc-62(e917) V.
	DP246*	WBStrain00006149			2000	unc-45(st601)/sC1 [dpy-1(s2170)] III.
	GE2722	WBStrain00007791	Schnabels		1999	cyk-1(t1568) unc-32(e189)/qC1 [dpy-19(e1259) glp-1(q339)] III; him-3(e1147) IV.
	KR1233	WBStrain00023821	HCHO	x1	1993	hDf8/dpy-5(e1)unc-13(e450)I.
	KR1876	WBStrain00023947			1999	+/hT3[dpy-5(e61)] I; dpy-7(e88) unc-3(e151)/hT3 X.	The Genetic Toolkit is funded by the NIH National Center for Research Resources (NCRR) (USA) to Ann M. Rose, David L. Baillie, and Donald L. Riddle.
	KR2839	WBStrain00023970	UV	x1	1995	hDf15 unc-75(e950)/hIn1 [unc-54(h1040)] I.	The Genetic Toolkit is funded by the NIH National Center for Research Resources (NCRR) (USA) to Ann M. Rose, David L. Baillie, and Donald L. Riddle.
	MT690	WBStrain00026751	gamma rays		1993	nDf6/unc-93(e1500) dpy-17(e164) III.
	RM2431	WBStrain00033392	Psoralen	x8	2001	unc-13(md2415)/hT1 I; +/hT1 V.
	RW6002	WBStrain00033537			1986	stDp2 (X;II)/+ II; unc-18(e81) X.
	SP123	WBStrain00034136	X-ray	x>3	1981	unc-3(e151) X; mnDp3 (X;f).
	SP127	WBStrain00034139			1980	unc-4(e120)/mnC1 [dpy-10(e128) unc-52(e444)] II.
	SP309	WBStrain00034207	X-ray	x3	1981	mnDp33 (X;IV)/+ IV; unc-20(e112) X.
	SP423	WBStrain00034230	EMS	x1	1980	mnDp1 (X;V)/+ V; unc-3(e151) let-2(mn153) X.
	SS746	WBStrain00034457	UV/TMP	x7	2005	klp-19(bn126)mT1[dpy-10(e128)] III.
	VC528*	WBStrain00035846	UV/TMP	x1	2003	eya-1(ok654)/hIn1 [unc-101(sy241)] I.	The C. elegans Deletion Mutant Consortium et al., 2012
	VC471*	WBStrain00035797	UV/TMP	x1	2003	+/hT2 I; kin-18(ok395)/hT2 [bli-4(e937)] III	The C. elegans Deletion Mutant Consortium et al., 2012
	VC1771*	WBStrain00036862	UV/TMP	x1	2009	mat-2(gk824)/mIn1 [mIs14 dpy-10(e128)] II.
CRIPSR-Cas9 balancers strains	FX30133	WBStrain00007608	CRISPR_Cas9	x2	2018	tmC3 V.	Dejima K, et al. Cell Rep. 2018 Jan 2;22(1):232-241.
	FX30144	WBStrain00007614	CRISPR_Cas9	x2	2018	tmC6 [dpy-2(tm9710)] II	Dejima K, et al. Cell Rep. 2018 Jan 2;22(1):232-241.
	FX30235	WBStrain00007640	CRISPR_Cas9	x2	2018	tmC20 [dpy-5(tm9709)] I	Dejima K, et al. Cell Rep. 2018 Jan 2;22(1):232-241.
	FX30237	WBStrain00007642	CRISPR_Cas9	x2	2018	tmC24 [unc-9(tm9723)] X	Dejima K, et al. Cell Rep. 2018 Jan 2;22(1):232-241.
	FX30257	WBStrain00007647	CRISPR_Cas9	x2	2018	tmC25 [unc-5(tm9708)] IV	Dejima K, et al. Cell Rep. 2018 Jan 2;22(1):232-241.
Previous studies
Li-Leger et al., 2021	see Edgley et al., 2021
Maroilley et al., 2021	N2
	CB4856
	BC986
	BC4586
	VC109*
Flibotte et al., 2021	VC386
* Strains sequenced twice (homozygous and heterozygous), as heterozygous worms were viable

## Sheet: Supplemental_Table_S2
CGC Strains and Shipments of strains containing each balancers between 01/01/1991 - 04/14/2022
Balancer	Strains	Shipment
nT1	529	11973
hT2	443	7412
mnC1	442	4633
mIn1	406	3911
eT1	228	3551
mT1	196	1325
qC1	150	2903
szT1	149	3114
mnDp1	104	876
hIn1	88	980
sC1	76	406
hT1	36	379
stDp2	6	241
mnDp33	4	108
hDf8	2	83
mnDp3	2	47
sC4	2	98
eDf43	1	36
e917	1	26
nDf6	1	38
hDf15	1	25
sDf22	1	48
hT3	1	36

## Sheet: Supplemental_Table_S3
Sequencing information
Strain	Technology	Raw fastq									Bam
		R1 %Dups	R2 %Dups	R1 %GC	R2 %GC	R1 Total Sequences	R2 Total Sequences	Total sequences	R1 Sequence length	R2 Sequence Length	Total Sequences	Coverage
BC1217	Illumina NovaSeq 6000	0.0828	0.0816	0.36	0.36	12368617	12368617	24737234	151	151	23993783	34.616
CB3475	Illumina NovaSeq 6000	0.0631	0.0618	0.37	0.38	9198903	9198903	18397806	151	151	17879008	23.5172
CB4281	Illumina NovaSeq 6000	0.082	0.0811	0.38	0.38	13962151	13962151	27924302	151	151	27093463	35.4804
CZ1072	Illumina NovaSeq 6000	0.0758	0.0741	37	37	12218164	12218164	24436328	151	151	23687133	33.8457
DP246_Het	Illumina NovaSeq 6000	0.0851	0.08377	36	36	14917568	14917568	29835136	151	151	28883006	40.7762
DP246_Homo	Illumina NovaSeq 6000	0.0814	0.0807	0.37	0.37	13251642	13251642	26503284	151	151	25654406	35.5389
FX30133	Illumina NovaSeq 6000	8.62581	8.64146	0.39	0.39	14431531	14431531	28863062	151	151	27928584	35.2328
FX30144	Illumina NovaSeq 6000	7.91398	7.87244	0.36	0.36	11211728	11211728	22423456	151	151	21690133	30.9413
FX30235	Illumina NovaSeq 6000	6.66191	6.55758	0.36	0.37	8878499	8878499	17756998	151	151	17207854	24.194
FX30237	Illumina NovaSeq 6000	8.08351	8.00866	0.36	0.36	13325981	13325981	26651962	151	151	25747751	37.2261
FX30257	Illumina NovaSeq 6000	8.40231	8.24512	0.36	0.36	13585591	13585591	27171182	151	151	26338198	37.2261
GE2722	Illumina NovaSeq 6000	6.81415	6.75251	0.37	0.37	9245856	9245856	18491712	151	151	17963968	24.8752
KR1233	Illumina NextSeq	11.1	10.5	0.35	0.35	16986524	16986524	33973048	151	151	32998187	43.0806
KR1876	Illumina NovaSeq 6000	7.31123	7.15243	0.36	0.36	10920806	10920806	21841612	151	151	21146418	30.3728
KR2839	Illumina NovaSeq 6000	7.14017	6.98015	0.36	0.36	8555726	8555726	17111452	151	151	16556432	23.8525
MT690	Illumina NovaSeq 6000	8.14999	8.14748	0.36	0.36	12423091	12423091	24846182	151	151	24133014	34.8836
RM2431	Illumina NovaSeq 6000	7.80278	7.64428	36	37	13476251	13476251	26952502	151	151	26134340	36.7448
RW6002	Illumina NovaSeq 6000	9.78322	9.52214	40	40	13308600	13308600	26617200	151	151	25949611	35.1554
SP123	Illumina NovaSeq 6000	8.69272	8.57005	0.36	0.36	13944714	13944714	27889428	151	151	27029179	37.9618
SP127	Illumina NovaSeq 6000	6.82558	6.78157	37	37	9931533	9931533	19863066	151	151	19221340	26.7385
SP309	Illumina NovaSeq 6000	6.89587	6.81655	36	36	8154967	8154967	16309934	151	151	15823086	22.8589
SP423	Illumina NovaSeq 6000	7.81175	7.59518	0.38	0.38	11595821	11595821	23191642	151	151	22504157	30.3625
SP998	Illumina NovaSeq 6000	0.0714	6.97877	0.37	0.37	10749125	10749125	21498250	151	151	20823911	27.7032
SS746_Het	Illumina NovaSeq 6000	7.39125	7.42162	0.42	0.42	14065609	14065609	28131218	151	151	27215854	31.4402
VC1771_Het	Illumina NovaSeq 6000	0.0844	8.38616	0.37	0.37	12218135	12218135	24436270	151	151	23662034	32.3047
VC1771_Homo	Illumina NovaSeq 6000	0.0935	9.2404	0.41	0.42	12514946	12514946	25029892	151	151	24274220	26.7047
VC471_Het	Illumina NovaSeq 6000	0.075	7.42757	0.36	0.36	10700286	10700286	21400572	151	151	20701169	29.3752
VC471_Homo	Illumina NovaSeq 6000	0.0671	6.61613	0.36	0.36	8351631	8351631	16703262	151	151	16173971	22.6968
VC528_Het	Illumina NovaSeq 6000	0.0777	7.79069	0.36	0.36	10072257	10072257	20144514	151	151	19396577	27.7026
VC528_Homo	Illumina NovaSeq 6000	0.087	0.087	41	42	14844879	14844879	29689758	151	151	28893086	31.4969

## Sheet: Supplemental_Table_S4
Breakpoints of Balancers
Chromosome	Balancer	Strain sequenced	Type	Breakpoint 1 (Bioinfo)	Breakpoint 2 (Bioinfo)	Confirmed	Breakpoint 1	Breakpoint 2	Junction	Sanger	Primer 1	Primer 2
One-event balancer
III;V	eT1	BC986, CB4281, VC109	Translocation			see Maroilley et al., 2021
II;III	mT1	SS746	Translocation	II:6296872	III:3635354	Yes		III:3635354		>>SS746_oMTG642 NNNNNNNNNNGNNNNTCGNNNGAGCAGCCNCATTCGACGAAGCACCTGGAAAACATTTTGATCGGAGAGTACCCAAAGTTCCaGTTATATAAACTAACCGCTCTGCCACTGACCATCCCACTGACCATCCCACTGACCATCCCACTGACCATGCCACTGACCATCCCACTGACTAATTCTAATTTATGAAAAAAATACATTTTCAAAATAGAGACGAATAAAATTTTAAAAATTTTATTGGTGTCTCTATTTTATCAAGCAAATATATTTTCAAAATAGAGACGAATAAAAATTTAATTTTTATTAGTGTCTCTATTTCATCAAGAAAATACATTTTCAAAATAGAGACGAATAAAAATTTAAAATTTTTATTAGTGTCTCTA…	TACTCCATCGAAACCAGCCATAGC	AACTGCCGATTTGCTGGAAAGAC
I	hIn1	KR2839 and VC528	Inversion and Tandem Duplication	I:11249952	I:15003739	Yes	I:11249952	I:15003739	22-bp insertion	>>KR2839_oMTG659_Inversion NNNNNNNCGTGATGATGNANATACAATTTGAGAGAGTTTATCTGAAAAATAACATTTCCAGCGATACTGACTATTGGACGCCATATGCTGACTGATTATCAACTTTCGCTATTCGACTTACTTCAATAAATAAATACATGCATACGAAGAATTATTTTAACAACTTCTTATCAGTTCCGAAATACATAAAACATTTTCATCTACTTGTCATCTACTCATCTACTGGTACTTGTCATCCTCATTCTTCGACATATGATGCATCACCATTTTTCGGGAATGACATCCACGGGTTACGGTAGTTGGTCCTCCGTCGTCTTCAGCGGTGAGAACCGAATAACAGAAGGGATCGTCGCTGAGAAAGTTGTAAAACAT…	TCGGACAATACGCCATTCAAAATGC	ATTTCCCAGTGGAGCGAAGC
I;V	hT1	RM2431	Translocation	I:8409987	V:7207631	Yes	I:8409987	V:7207631	3-bp insertion	>>RM2531_Translocation_oMTG610 NNNNNNNTNNNACTNTGTGTTACTAGNNATNCAACCTATCAAATATACAGAACAACAATACCACACATACAAATAATAATAGTAATGGGTGAGAGAGAGCACAGAGAAAAAAAGAGTGGCGAGGAAACCCAGAGATTCGAGGAAAGGATGAGTGAGCGGTGGATGACTGAATTAGAGATCATTTGAAATGTGGAGTGTTCACAGAGAAACCGACAGGAGGGCATTGGGCGAGGAGCCGTGTGCGCGACACTGCTGCAGTCTCGGAGGATAGTTCGATTCCCGACGGTAGTTCAAAGTTGTTCTTGCTCAACCATGTAGAGCACGCGAGAAGGATCGGAGGCCAGCAGATTTGATAATATTCACGGCAA…	CGGATTCTCCAAAGCGGCTTC	TCTACAGTGAAAGTGCTGCGAC
III	nDf6	MT690	Deletion	III:3607207	III:3695411	Yes	III:3607207	III:3695411	47-bp insertion	>>MT690_oMTG657_reversecomplement NNNANGAACAACAGCCGANNNNGAACNACTCNTTNTCCAATNNNNNNNNNGGGNNNAAAGGAGTATGTGATNNTNNNNNATTTTTCCTTTCTTCCCGACTCCTTCTAAGTGAGGTGGTTGAGCGCGCACTCTCGCCATGCTGTGGAGGTGAGAGACGCAGAGACCGCCTTTTTCTCTGCGCTCTCTCTGCGCATTTCTCGTGGTGGAGGCCGTGTGGCCTAAAGCCTAGGAATGGCCGCGAGAAGAAAAAAAACTCGGCCACCATTATTTTCACGGCTATGTTCCAAAATCCTCTTTCTGTGACATAAAAAACTATAGATATTATACATATTGTAGAGACGCAGAAAACTGAAACAAAGTGCAGA…	GCATGTGCTCTTCCTCTCTCTCG	GCATTTTCCTTTCTTCCCGACTCC
II	mIn1	VC1771	Inversion	II:3553628	II:12704681	Yes	II:3553628	II:12704681	5-bp overlap	>>VC1771_Inversion_oMTG608 NNNNNNNNNNGGNCGTGGAGTGGACTAGGGACGAGCTATAGGAATTTTAAAAAATTGCTCTGTTGTAATTTGGTAAAAATAAATAATTTAATTTGTTTTAATTTGATGTTTTACAGATTAAAATTGCATTAAAAATTTATATTTAAGAATTAATTAATTTTCCCTGCTCGTCATTTTAAATGCCAGTTCCGCAGGTACACCGCCACGGTAGATTGCGGACAAAAGAATCCTTTTTTTAGCTGTTTTAAGGAAATAACAAGAAATTTCGATGAAATAAAAATTTCTAATCACGTGGTGTCAGAGTGTCCCATTTCGGCGTGATCTACGTAGATCTACAAAAAATGCGGGAGATGAGACGCAGAGTTCTTTCTA…	GAGCGGTATGATGACGTGGAAG	AAGTGGGCGGAGCTTTATGTTTG
I	hDf15	KR2839	Deletion	I:12431742	I:14006044
IV;X	mnDp33	SP309	Translocated duplication	IV:3518557	X:2833653		IV:3518557	X:2833653	5-bp insertion	>>SP309_oMTG755_Translocation NNNNNTNNAATCTGANNTTCATTTAACCTATAATTGTCACTGAAATTTCTGAATTTCTCACCATTTTTCTATTTTTTTCTGCTCAAAATTTCGCGATTTTTCAAACAATTACAGTGAACATTAATTTTTTAATTGTTCTCCAGGTGACATCTGTTCAAACAATTCTCTCTCCCTCCGTCACAAACAAACAAAACGCCGCGAAAAACTTGCTAAACTTTTAGTTTTTTTTTTTGAAAGTTAGCAATTTGCCAATACGTTGACTGGAAATTTGAAAAAAAAGCATCAAAAACCCTGAAACTTTTTGGAAATTTTCATTGGGATATTCGGTAGTTTTAGATCAATATAAGTGTATTTAGACAAAATCCCGCG…	AGGAACAAATTGCCTGAAATCGG	CTGTTTAGGTGGCGCTCAAGTTC
IV;X	mnDp33	SP309	Translocated duplication	X:2853000	X:4028000	Ratio = 1.2
IV	sDf22	BC1217	Deletion	IV:12526376	second breakpoint unclear	No split reads – primers designed with pair of reads with large inner distance Sanger bad quality (DNA bad quality?) The sequencing for BC1217 had some fadeout/abrupt stop and there are a lot of Ns				>>BC1217_oMTG907 NNNNNNNATNGATTGAAAATCTACCATAACCATTAGTTTTCATGGCGAGACCTCTCATGAATCATGATTACATTTCGAAGATTTTGGTATGCTGATTTGAAATTTGTAAATTTTGAATCAAACATTTTTTATTAACAAATAAAAACTTCAAAGTGAAAAATTCAAAACGTCCACAAATTAAATTTGACATCCAGATTCATATTCTTCTTATTAATTTTCCACTTAACAATTTTTTTTTCTCTTTTTTTCAATTTTTTTTTTTTTTTTTTTTTTTTTTTTTGGGGGGTCCGGGGGCCCCCCAAAATTTTTTTCCCAAAAAATTCCGGGGAAGGGTTTTTTAATTCAAATTTTTTTTTTTTTTTTAAGGGAAAAAAAATTTTCC…	GGTCTCACTTTGAAGATCAAGTTTC	GTTATGAGGATCCGGTCAGTTT
III	sC1	DP246	Inversion	III:323321 or III:330985	III:4641137	Bkp1 falls into repetitive region
Balancers more complex than previously described
IV;V	nT1	BC1217	CGR Chromoplexy	IV:1901208	V:11072802	Yes	IV:1901208	V:11072802 or V:11081514	2-bp overlap	>>BC1217_CGR1 NNNNNNNNNTNNCTACNAATTTCGTCTACAATCTGTCAAGCTAGCTTGAAAGTACACCCAAAACCCTCTATCACNAATTTTGAAGCACGTGGCCTAGCCGCATGCTTCCACCTCCCAGAGAGACTCCCAACAACAACAAGAAAACTTTTATCCATCGTGCGATTTATCCATTTATCCTATCTCCAATGCCTATCCGCTTTGATTCTATTCACACACACACACGGACAAAGAAGAAGAAGGAGACACATCTGGCATCCATCCAATCATCGTTTTTAACACCACCACCACCAACACCGTCCCTCTTCTTCGTCTCCTCTTTCGTCCTCCTCTTCCGTGTGTTTGTGTGTGATGATGATGATACTCTTATGTCCCTCTCTCCACCTAT…	TGGGAGCTGGAAGCTAGTGAG	AGACGAGGCCCAATCCAAGAG
IV;V		BC1217	CGR Chromoplexy	IV:11255068	V:13866656	Yes	IV:11255068	V:13866656	6-bp insertion	>>BC1217_oMTG713 NNNNNNNNNNNCNNNNNNNNTGTACTTTGTTTAACGATTATCTTTGATGTGTCTTTGAATTTCTTATCTCTGAAAATTGGCTTTGAACACTTGGCCCTTGTAAGCTGAGTTCGATCTACACACAAATACATGCGAAGGGCGCTACAATCCGCCTTCAAAAGTATGCACGCGGAGATGAGATCAGTGCAGATAATGATCTAAGCCCATCTTCCTCACGTCCGTTCAACCCATTTCCTATTTGTTAAGTCCATTCTTCCTTCACCTTCCTGTTTTCTCTTAAATTAGTCTTCTGCTTTGACACCTCTTCCCTGAAAAAAAACATTGTTTAAATTGCCGATATTCATTCCAACTAACCAAATCGGCCATAGCATGAGCTTTGGGT…	TGCCATTTGTCCCGGTTTGC	GTCTGTAGAATTGCCGCGAGC
IV;V		BC1217	CGR Chromoplexy	IV:11254912	V:5515463	Yes	IV:11254917	V:5515476	19-bp insertion	>>BC1217_oMTG713 NNNNNNNNNNNCNNNNNNNNTGTACTTTGTTTAACGATTATCTTTGATGTGTCTTTGAATTTCTTATCTCTGAAAATTGGCTTTGAACACTTGGCCCTTGTAAGCTGAGTTCGATCTACACACAAATACATGCGAAGGGCGCTACAATCCGCCTTCAAAAGTATGCACGCGGAGATGAGATCAGTGCAGATAATGATCTAAGCCCATCTTCCTCACGTCCGTTCAACCCATTTCCTATTTGTTAAGTCCATTCTTCCTTCACCTTCCTGTTTTCTCTTAAATTAGTCTTCTGCTTTGACACCTCTTCCCTGAAAAAAAACATTGTTTAAATTGCCGATATTCATTCCAACTAACCAAATCGGCCATAGCATGAGCTTTGGGT…	TGCCATTTGTCCCGGTTTGC	GTCTGTAGAATTGCCGCGAGC
IV;V		BC1217	CGR Chromoplexy	IV:1901518	V:11077404	Yes	IV:1901518	V:11077404	3-bp overlap	>>BC1217_CGR4 NNNNNNNNNANCTCCGATCCNGACGGAGTACTTGCGCTCTGGTGGGGCGATGATCTTGATCTTCATGGTTCTGAAAAAAAATCAATTTAATTTGTTAACTGAAACAAAAATAGAAAACTTACGATGGGGCAAGAGCGGTGATTTCCTTCTGCATACGATCAGCAATTCCTGGGTACATGGTGGTTCCTCCGGAAAGAACAGTGTTGGCGTACAAGTCCTTACGGATATCAATGTCGCACTTCATGATGGAGTTGTAAGAAGTCTCGTGGATTCCTGCAGATTCCATACCCAAGAAGGATGGTTGGAACAGAGCCTCTGGGCAACGGAAGCGTTCGTTTCCAACAGTGATGACTTGTCCGTCAGGAAGTTCGTAGGACTTCTCGAG…	GATCCACATCTGTTGGAAGG	TACCGTTTGCCGAGTTTG
IV;V		BC1217	CGR Chromoplexy	V:11078600	V:16831547	Yes	V:11078600	V:16831547	1-bp overlap	>>BC1217_CGR5 NNNNNNNNNNNNGATNNACNACGTTTCACAGAAATATTATTAATTTTAGTATATTCGAAATAATATAGTCCTACTCTTTCTCAAGCAAAAATTATTATTGTTTTCGAATTAATCCACCCTTTATATAAAAACAATACCTGATTCGGCGAATACTTCAATGAATCACGAAGAAAAATTGAGGAATGATTAAAAAATCACGAAAATCAATGAAAAAGAATTGAAACGTGTTCCCAAAAAAGGAAAAGATGACTCAACATGACGGTCAGCAAATGTAGGGAACAAAATTTGGGTGACATCAATAGGCCTGTTGAAAAGGTCAAGTTATCACAGTGGGCCGGCACTCTAACCCCAGCTACCAGGCCAAGCCTACATATACCGTGCTCAA…	TGACCCGCCCGTAGTTATCC	TTTCAACGATTGGTGCTCCATGTC
IV;V		BC1217	CGR Chromoplexy	V:16831759	V:16832779	Yes	V:16831759	V:16832779	2-bp overlap	>>BC1217_CGR6 NNNNNNNNNTTGNNTCTATTTGTTGAGCTTTCAGTAATCAAATTTGTAATATGGAAAATGCCATTGTTTTAACTTNNCTCCAAAATGCAGACAAAGAGATGTAGGGCAGGTAGGTAAGCAGGCGTGTTTTTTGGAGTATCTAGGTGTGGAAACAGAGCCTCAAGTCTACATGATCATTTTTATGGGAGCATGTAAGTTTGTCCTGAACTCTGTAGTTTTACTTGAGCACGGTATATGTAGGCTTGGCCTGGTAGCTGGGGTTAGAGTGCCGGCCCACTGTGATAACTTGACCTTTTCAACAGGCCTATTGATGTCACCCAAATTTTGTTCCCTACATTAAAATGCCATTAAAAAATGATGTTGGTCGCAATTAGCCCAAACTTTA…	ACACGCCTGCCTGCCTAAAG	ACGAGGACAAACAGGCGGTTC
IV;V		BC1217	CGR Chromoplexy	V:5622382	V:13861523	Yes	V:5622382	V:13861523	3-bp overlap	>>BC1217_CGR7 NNNNNNNNATACCCTCGGGAGGAGAGGTTCTTCTCTCCTTCTTCAGATGTGTCTGTTTTCTGTTTTTGTGNGTATGTATTTGGTGGTGGCGCATCAATTGCCATCGCTTGCTCTCGATTATTCTAATCCCTTTCGCGGGGGGTGAAATCGTTTCTTTTTCATTTTGAGTGGTGGTGGTGGTGGTGGACGAGTCGCGGGGTGCTCTGAAGTTTCTCCGAAAGAGAGACCCACAAGTTTTATTTTGAAACAAGTTGAGAGTCTTCAGAGTTGAGATTCTGTCCCATATACTGAATGATGTGGCATCTTTGCAAGACCCTAAAGGTGTTAATGTATAACATAACAAATCTAATTGTGCCGCGATTTTTATTGATAAACAAAAAATCAA…	ACTTCCTGCCCTGTCTTGTTTC	ATCCAAATGACCACCCATGC
IV;V		BC1217	CGR Chromoplexy	V:11084443	V:16821528	Yes	V:11084443	V:16821528	strict	>>BC1217_oMTG1047 NNNNNNANGCTTTGGCATGAGGCAGACGTCGGATAGGCTGAAAGCAAGCATAGGGTACGCATGAAGCAGGCGTTGAAGAGGTACCAGGCAGGCGTAGGCGCCTTGTAGGTAGGTAGGCATTGCACGACATGCCTGACGGAAGCTTGCTAGAAACAAGATTCATTGTGCCTTCTCTGTCAAGTCAAACCCCCCACAAATCACTAATGTAAAATTCGCTTACTGAATGGTAAAAATGGCAAGGAAGCATTGCAGTTTTCTGTGGTATTTTGCATCTTTAATATGTTCCTAGAAACCTACAGTAACTTCATGGATATTTTGATTTTTACCGTTAGTTGGTTTAATGTATGTATGTTTTGACAATTCATTAGAAGCCACGTGCGA…	CAAGAAGCAGGCATAGAGTAGG	GGCACGATAGATGAGAGGATAAAG
I;III	hT2					see Flibotte et al., 2021
I;X	szT1	CB3475	Translocation , inversion and free duplication	I:7631470	X:2314605	Yes	I:7631470	X:2314605	3-bp overlap	>>CB3475_Translocation NTNANGTGCACTCCGTGTGCATTCCACGTAAATTCATGTGTGATGGTGACAATGATTGTGGAGACAACTCAGATGAAACATCATCAGAATGCAGAAGTGCTCAATGTGATCCACCACTTCGATTCAGATGTGCTCATTCTCGTCTCTGCTTGAATATTCTTCAACTTTGCAATGGTTTCAATGATTGTGGGCCAAATGATTTCTCCGATGAGCATTTGTCAATGTGCTCAAGCTTCTCAGAATACGGTGATTGTTCATCTGATCAATTCAAGTGTGCCAATGGAAAATGTGTGAATGGAACAGTGGCATGTGATAGAAAGGATGATTGTGGAGATGCTTCTGATGAAATTGGATGCTGTAAGTTTCAATGATTTCA…	ACAGTCTCGCCGTACTTGCTC	GTGAAATGAGCGACGGAACCAG
I;X		CB3475	Translocation , inversion and free duplication	X:2314606	X:2597439	Yes	X:2314606	X:2597434	2-bp overlap	>>CB3475_oMTG684_FreeDupInversion NNNNNCNANNNTTGANGAATGTAATGACTCTTTGCGAGTTTGTTTCGATTTAAATTCAAACGTAAACTATAAATATATATATATTCAAAGTCAGAAACGCGTTCTTTTTTCAGTAGCTTTTTTCAGTAGCTTTTTTTCAAGTGTAAATTAATTCTGAAAATAGGAGAAAAATAAAATAAAATTTTCGTTTTCCGTCTAGAACGTCTAGAACCAAGATCACATTTTCAGTAAAACAAGATTCCGAGGAAGTTTTTCTTTGAAATGTGTATGTGTTTTTCAACAATTTTTACATTCAAACGGCAAATAAATTTTTATTTTAAATTTAAACTATGCCTAGATTGAATAATTTGAGAAATTTCTCCATT…	CTCGTTCGCATGTGTCTGGTAC	ACTTTCGTGAAGCCAGGCTGTC
I;X		CB3475	Translocation , inversion and free duplication	free duplication	see coverage
V	eDf43	CB4281	CGR DUP-DEL-DUP-INS	V:3466642	V:3483655	Yes	V:3466642	V:3483655	2-bp overlap	>CB4281-2_oMTG455 CAATAGTAGAACCACAAAGGTGTCTAATAAAGCTAGCCTATTGGCTTTGGAAATTTGATTGCTAGATTGCCCATTAGTATTCCAGATAAATAGTTTTATAGATATCAGTATAGAAAACACCAGGATCGAGAAAAATATTATCTGAATTTAAACGAAAAGCTTAAAAAAAATTATTTTAAACTATTTTTCTTACACTTTTATGAATTGTCCAAAAGCTGTAGAAACAAGAGTTCACCGCGCATCCAAATACTTTACAGTTCGCAATCCATCTTTCTGGTGACTGTGTCATTCAAGACTTCAGCTACTGCCACAGTCCATGACAGAAATACCACGATAGAAATTTTTTGGGTTTTTGTTTTTAAAGAATCTCCAGACCAAGAG…	TGGTGCAGTAGGCCACATAGTC	CCGACATATTCTGGGTTCCACCAC
V		CB4281	CGR DUP-DEL-DUP-INS	V:3466718	V:3714670	Yes	V:3466718	V:3714673	5-bp insertion	>CB4281-4_oMTG391 TTGGTCTGCCGANTCTGCACAATCATCGGGCTGTTGTTCCTGATCGCTGGAGCCGTTACCATCTGTATTGGGTATACATGGAGAGAGGAGAGAAACATCGAACAGTCCATCGAGCGTTTTGTTCTCTACCAGGTTTGTGTGAAATTTGGCAAAAAAAAGAATTTTAGGCGGGAGATTGAAATTTTCAGTGAAAATAAGCGGGGAGTCCTTTTTTTTTGAGAAAAAACATTAGCGGAAAATTCGCAGTTTGATACGTATAGAAATTTTTTGGGTTTTTGTTTTTAAAGAATCTCCAGACCAAGAGCATTCTTTGAACTATAAAAACTTATAAGAAACTTAATGGATTCCTTGAGAAAAATGTAGAAATCCCGCAGAATGCCA…	GTACTTGCTACCACCGCCAC	CCGACATATTCTGGGTTCCACCAC
V		CB4281	CGR DUP-DEL-DUP-INS	V:3466648	V:3469548	Yes	V:3466648	V:3469548	3-bp overlap	>CB4281_oMTG1007 NATNNNNNGNACTATGANTTTTNNNNNGCTTTATACAGGGTGTGCCAAAAGTATGGTAACACATGAAGCGCTCTTTTACATGAGCTTTTCGCGCGTCTGCCACGTTATACGTACATTCTTCTATCGAATACTAATAGCTGAATAAATTTCCTTCAATTTGACCTAAAATTTGCAATGTTTCCCAATAAGGTGCGGTTTTAATCACCTCGGCAATTTAGCGAACCCTTTCGAAAAAACGGTGTTTTGGCACGCGGCACTTCCCACACAAACACACCTCCCACGCACGCCAATAATTTTCAGATGTACATATGATTTTTATGTTAAATTCAAAGTTAAAGAAGTGAAGAAGCGCTTTTGATTGTTTTTGTAGCCTATAAAAATT…	ATGAGGGTGTGTTGTGGATATT	GATTCCAGTAGTTTGCCGATTTG
V		CB4281	CGR DUP-DEL-DUP-INS	V:3467157	V:3467175	No - Insertion
V	e917	CZ1072	Complex inversion	V:4489199	V:14577009	Yes	V:4489199	V:14577009		>>CZ1072_Inversion_oMTG604 NNNAANTNNNNNNNACNANNGTCTNTTANNGNCCGTGACCGTCGANGAGAAGTCTGATGATTGGTTGATTGTTCTGCTCTTTGACAATCAGTAATTGTTGTGTGTCAAACATTATGTTTTAGGAATGAGTTTTTCTTGAAATCTTAGGAAAATGTTATCGATTTCAATTCTGAAAAACTTGCTATCAAGAGATATCATCGGGAGGATGCGCTGTAACACTCCGTATTACTTCGGCGGGGAGAGGTCAAGCTTATTGAGTTTTTTTGTGCAGATTTTGAGATTAAATATTTAGTTTTAGTATTAGTTATTAAAATATATTTTTTATTTTTTGAAATGTTCTCCAAAAACAATTCGCATGGAAATTTTGAGAAC…	CCCTTCCTAGCCGATTGAAGAAC	AAAGGACGGATGGTCTTGCAC
V		CZ1072	Complex inversion	V:4489202	V:4488422	No
V		CZ1072	Complex inversion	V:4488516	V:14577008	No
V		CZ1072	Complex inversion	V:4489199	V:14577013	No
II;X	stDp2	RW6002	Translocated Duplication with additional rearrangements	X:6841311	X:10304171	Yes	X:6841311+	X:10304171-	1-bp overlap	>>RW6002_oMTG819 NNNNNNNGANGGGTCAGTTTGTGTGTGATGATTAGGTGAGTGAGACTATTGGTTAAAGAGGGTGAAAAGNNAANNANGACACTTTTGTGAAATGTTGAAATTGATCTTGATTATAAACGTTTGGTGAACACCTGTTTTAAGGAAAAGTGAATATCTCAACATTGTCTTTCTACCGCCACCAACATGCTCAATTTCCACGTCGCTTCGCTATTCTGAAGGTACAGTTTTTTGTCTCTGTGTATTTATGTCTTTGGACACCGTCTAATGTTGGAAATTTAAAAAATCAAACACTACAGGCCGTAGGAAAGCACGAGCTTGCTCCACCACGTCAAGCTGACTGGCCAGCCATCAAGGCCGATTGGGCCAAAGTCCAGANCCTTCA…	CCCTCCGTCTGATATGTTGTTAG	TGGATGAAGCTCTGGACTTTG
II;X		RW6002	Translocated Duplication with additional rearrangements	II:3907835	X:10301309	Yes	II:3907835-	X:10301309-	5-bp overlap	>>RW6002_oMTG821 NNNNNNNNNCGNNNANNTTCGTTCAATTTAATTGACAAGGAAGTATCGTTAAATGACAGTACCTTGCAAAGAAAACAGTGACACAGATTTGTTCAATCCACTTCTTTTGCATGCACTCAAAACTTGTTTCCTGATAATCTTCCTATCCGTGGCTATCTGTACAGATTATAAACGTGTTAATAGGAGAAAAGTTCCGGAAAATGCTCCGTTGATAGCTTTCGGAGCATTGCTGAACGGTGAAGCAGTCCACCTTGAAGCCTTCCAGTGAGTCTCGTAGATAATCATTCTTGCTTCCGCTCTCCNNNNTTNNCACGTTTATAATGTNGAGAAGGCNGCGGCTGGGAGGATGATCAGGAAAAAAGTTTTGAGTGNNTGCAAAAGA…	GGCATTTCTGAGTAGGAACTAGG	AGGAGAGCGAAGCAAGAATG
II;X		RW6002	Translocated Duplication with additional rearrangements	II:3917998	X:10306354	Yes	II:3917998-	X:10306354+	17-bp insertion	>>RW6002_oMTG823 NNNNNNNNNNNNNNNNTCGTTGTATTACAGTGTGTAGTAATACATATCTTTAAATTTTTATTTTCACTGAGAATTTGATACNNANNGGGTTATCTATTCTCTTTTAAAATCTCCAAGAATCAACATAATCTTTAGTGATTATGCTTATCACTGATAGTTTTATGAAAATCATTTATGATTATTATATATCACATATTCTATGATCACTCTTTTAGTTCCTAAAATCAGGTCTCCTTACAGGGTTTCTGTCTTGATGCGCCTCACCTTCTTTACCTAATCATATTTTTACCTAATCATATTTTTTAAAAATATGGACGAATTTGCCTATTTTCTAACCGTTTAAAAAATATATTTGAACTTTGCCGGCAAAATATGGAGCCTT…	CCTGGAGACCGTAATGGAAATAC	CACAGTCAAGACACCACTAACA
II;X		RW6002	Translocated Duplication with additional rearrangements	X:10301979	X:10304145	Yes	X:10301979+	X:10304145-	5-bp overlap	>>RW6002_oMTG825 NNNNNNNNCTACTCNGANGCCAAATAAAATTAAAAACATAACGGTTTATGTAAAAGAATTAATGTTTCAATTGAAATTACCGAATATCAACTAAAAGAAAAAACAAGGGTAAAATAAAGTTAGAGTACTGAAAACATGTATTCGCACACTTTAGCAAGTTTGAATGGTATTTCTTACGCTATTATTTATTTCACCAAGTTTGTAAGACAAAATTACAATCTACATATGTTCGGATTTTTATAATCAATGGTCAGTGAGTTTTCAAAAACTGTAGTTTTTATCTTAAAAAAAACACTTATACCGTCACCGAAAAATGTCTTTAAAAAACTATTTAAGTAATAAGAAAAAACATGCCAACTTTTGTTATCTTAAAGTGAAATAG…	CGAATGATCCCGAAGCTGATAA	CTTTGAAGGTGTGCTGCTAAAC
II;X		RW6002	Translocated Duplication with additional rearrangements	II:3910889-	II:3910983+	Inversion – No as there is a LOSS on the left end
II;X		RW6002	Translocated Duplication with additional rearrangements	II:3907835	II:3910889	Deletion - No
II;X		RW6002	Translocated Duplication with additional rearrangements	II:3910984	II:3917999	Duplication -No
II	mnC1	SP127	Complex inversions (3 inversions overlapping + 1DEL – longer than described)	II:4904692	II:14909258	Yes	II:4904692+	II:14909258-	19-bp insertion at junction	>>SP127_oMTG954 NNNNNNNNNNGCAGANACTTGACAGNNNGTTGCAGCAGCGCGTAGAGTGTATTGTAAAGTTGAGAGAGTGCTAGAGAAAAAAAAAGAAGCGAGAAGCTGACTGGTGGCCCCAGGTCTCCTTCCAAAAGCCACTCATTTCCCTCTGTCGACACCCGTCAACTTAAATTTTTTGGGGCCAGAGACGTCTGGGTACCAAAAGTTTTATTTCAAGCTTGTTTTATTCGTTTTTGTTTCAAAAAAAAAGTGTGATAGTCAGGAGAAAAGTGTGATAGTCAGGAGAATGTATTAGAATTTAGAATCGTTTAGGGAAGTAATGGGGCTTGCAACTGCATTATGATCAGTATCACCAGCCCACAAACTGCTCAGTATCAGTGCCAGTGTGC…	GTGTCTCGCCACGAAAGTAA	CTCTCATGGCTGCAGAGTTATC
II		SP127	Complex inversions (3 inversions overlapping + 1DEL – longer than described)	II:4904696	II:7535185	Yes	II:4904677-	II:7535185+	rearrangement at junction	>>SP127_oMTG956 NNNNNNTTTNNANTTCCNCAATTTGAACAAGTTTTCATTTAAAAAACACATTTCGAACGGAAAATTTGGGNNAANNANAGCTTGGAACATAGTGAAAAAGGACTTTGCGAACAAATAAATTAAAATTTGCTTGATTTCAATTTGTTTTTTTCATTTTTTACAGAAACAACAAATTTCACAGCAACTTTTGTATTCGTTCTCCTGACTATCACGACTCAAAGAGTGCCTCGCCATGTTAGTCCATATGCTCACGCACCGAAGATATTTGGTTTGAAATTTAAAGTAACACATTTAAATATTCTTATTGTATTTCACAAATAGTAATATTTCAGATAGCCTCAAAAGTATTGCTGGTTTTTGAGTCAATACTTGGAAAATTAATT…	GGCAGAATGGCTGGGTAAATA	TCAGCCTACTTGAAGGGAAATG
II		SP127	Complex inversions (3 inversions overlapping + 1DEL – longer than described)	II:7535181	II:14909251	Yes	II:7535181-	II:14909251-	strict	>>SP127_oMTG958 NNNNNNNTCATATGATGCTCCCCAGTCGGCTGACATTGCAAATCAGCTCACCGCAATGTCCCAACAAACTACCGGAATGAGCGGAGCCCGTTGTGGATGCATCCAGATTGTCATCCAAGGAGCCCCACAATACAACTGCCAGTGCGGAGATCAGAGTGGAAACCCGGTTAGTTTTTGGGATGGTGTAGGGGGATTCTAATCATTTTTTGAATATCTAAAACTCTGAAATCTAAGCTCCCAACCACCACCACAATGGCTCCAACCACAAGCTCCACCACCACCACTACCACCACAACCACCCAAGCCCCAACCACAACTTCCACTACAACTACACAATCGCCAGTCTCCTACCCGCAAGTGCCAACTCAGACACAGGTATATCC…	CATTTCTAGGATGGCTCCTCTTC	GTATCACTCGCTTTCCACTCTC
II		SP127	Complex inversions (3 inversions overlapping + 1DEL – longer than described) -DEL	II:9692491	II:9695040	Yes	II:9692491+	II:9695040+	strict	>>SP127_oMTG960 NNNCNNANAAANNATGAAGATCTCTGTTGAGAGCTATAGGTTCTGGCTCCGCCCAATATTCGGGGTTCTTCTTTGGAAGGTGGGTGGAGCCTAGGGGAATGGTGAGGACCGTTGTAAAATTAGAGAAATAGATAGGGAAACGGAAAGTAACATTTCAATAGGGATTAAAATTGAATTTAAAAAAAAACATAGAAAATAGTTTTCAACCTATTTGGAAGATGGAAAAACAATCAAAGTATATTTTATTTTGAAGCTGTTGGTTTGGTATCAAAACTTGAAACTAGGTGCTAAAAGTGGTGCGCCTTTAAATTGAAATGTCAAATTTTAAAGAAATTATTATACCGTTTTCGAACAATAACTACTATTCTCTCATTAAGATTATA…	GGGAAGTAATGATGCTCTGTCTC	CAGCCACCACTCTTCCATTT
II		SP127	Complex inversions (3 inversions overlapping + 1DEL – longer than described)	II:7535124	II:14909253	Detected by Sanger (II:7535181)	II:7535124-	II:14909253-	4-bp overlap	>>SP127_oMTG958 NNNNNNNTCATATGATGCTCCCCAGTCGGCTGACATTGCAAATCAGCTCACCGCAATGTCCCAACAAACTACCGGAATGAGCGGAGCCCGTTGTGGATGCATCCAGATTGTCATCCAAGGAGCCCCACAATACAACTGCCAGTGCGGAGATCAGAGTGGAAACCCGGTTAGTTTTTGGGATGGTGTAGGGGGATTCTAATCATTTTTTGAATATCTAAAACTCTGAAATCTAAGCTCCCAACCACCACCACAATGGCTCCAACCACAAGCTCCACCACCACCACTACCACCACAACCACCCAAGCCCCAACCACAACTTCCACTACAACTACACAATCGCCAGTCTCCTACCCGCAAGTGCCAACTCAGACACAGGTATATCC…	CATTTCTAGGATGGCTCCTCTTC	GTATCACTCGCTTTCCACTCTC
III	qC1*	GE2722	CGR	III:1286508	III:9955633	Yes	III:1286508	III:9955633	1-bp overlap	>>GE2722_oMTG933 NNNNNNNNNNNNNACGATTCTGATGNGNTTCATCTTGANNAGACTTGATAATTCATCAGCCATCGCGACGACTCCTGATCTATGCAGTCGAGTGTTCTCCCATAACTCATTCTCTCTTTTGATCGCCTGCTGCTTCACTGTAAGTCTCGGCTTCTGAGTTTTCTCCTGCCATTGCTTTTCTCGTTTTTCCACAGATTCGTCAGAAACCTTATTGAATGGATTATACTCATCATCAAATGCTCCTTCATTATCATACCATTCTCTGTCCAAATTCTTCTGTTCCTCTTCCCATTGAGCTCTCTCTTCGTCATCATGAAATGTGGGCTCTGCTTTTTCTTCTTTAACACTTCGTACCGAATCTTCTGGTTTTCGATGTCTCCGT…	CCATCAAGGAATGGAGGAACA	GAACAGTCAAGCCAGGTATCA
III		GE2722	CGR	III:1286122	III:13737952	No
III		GE2722	CGR	III:4404344	III:4404470	Yes	III:4404344	III:4404470	122-bp insertion	>>GE2722_oMTG789 NNNNNNNNNNNNNNNNNNNNTNNNNNNNTNNNNGACATTACCTGAAACATAATACGAATATGTCAAGAACTGGGAGTAAAATGCGACGAAACGGATAATTTCAAATAGCAGTGGTTGTAAACGCTATTCTAATAGAAAAACAATAAATTATGATAGTAATTTAAATGATTTAAGCTGAAACAAATTATATATTTCAAGAAAAAAACATGAAAAACATGAAAACAGAAGCGAATACCGTTCAAAATTCGAGTAATAAATTCTGTTCTACGCGAAGCGTGCCGCGTGCGTATCTCAAGGGGGCGCAATTGCACACTACCAAATTTCGGCAACTAAAATTGGAATTACCATGGAAACGAAAAAAATTCCAATTAACCTGGGGTAT…	GACTGAAGCTCTGAGGACGTGG	TATTGTGATACCGGGCCAACTGAG
III		GE2722	CGR	III:6649394	III:6682735	Yes	III:6649394	III:6682735	strict	>>GE2722_oMTG937 NNNGNNTGNANNTTTTAGAGCTGCTTAATTTTTACTGTTGAGACAATTTGAAAAGCTCATAGTCAGTAAAAAAATGTTCTAAAAAATGTCGCCAAAAATGTTTAAAAAACTGATAACGTTGATTTCCAATCTTTGACGACCTACAAAATCAACTTAATGATACAATCTACATTGCATATTCATTTTAAAAACGCTTTCTGTCCAAATTATTCATATTAAGTCTCGTCACAGAGAAATTATTTTTATAAGGATTTTTTTCAAGTCTAGATTAACTGAAACAATTTTTTATGTTCTGTGCCAAAAAAAAGTGGAGAATGTGAATTTTAAGTGAATAATTGAAAACATGAAGATAACTTTTAAATTTAAAAACTTAGTTAATAAT…	GGACCATCTCACAACAGATCAT	GGATACGAAGGCGTCAGATTTA
III		GE2722	CGR	III:6645681	III:6691080	Yes	III:6645681	III:6691080	1-bp overlap	>>GE2722_oMTG939 NNNNNGNNNGGATTTGNTGTTNCGGCAGTTCTCAACCTTTTCTTGGGGATATAGAAGTTTTGTAAGTTTTGATATAATGAAATAATTGGAAAATTGCTGATGTTATTTTTTTTCGAATCCGATTTGCCAAATAACTAAAAACCGAAATTTTATTTTTTTTTCCTATTCTCTTCACGGTTGCTAGAATTTTAGGACCCACCGAAATTTACACGTCATTTTTCAATTTCTTCGTTTTCGTTTTCTTCCTATTTAGTTTCCCGAAATAAATTAGAAAATTCACCATGTCAACCCGTCAATTTGCCCTATTTTTCCACTTTTATTTCCTTTTTAAATTAGCTGTTTGCAGCGGGAAGACGACGACAAATGTCAGTCGTCTTTTATT…	TTTGGATTCGAGGGACCATTAT	CTCTCGTCACTTTCGTCTCTTT
III		GE2722	CGR	III:6682735	III:6682894	No					CTCTTACAGCAGTCCTTGTCTC	CTCTTACAGCAGTCCTTGTCTC
III		GE2722	CGR	III:7265135	III:7265250	Yes	III:7265135	III:7265250		>>GE2722_oMTG791 NNNNNNNNNNNNNTGNNGAGTTCGANTAGAAATATTAGACATTTTTAAAATTGGGGTTTTCCGAACCAAATCCAACATCTTTGAACTCCGAATACTGATTGGTTTAAAATTTGGCCGAGCGAATTGCTAATTTTCTCCAAATTTTCAAAGTAATGTTTTGTTGTTATTTCTGAACTTCAGACTATTTAGGTTAAGTTAAAATAAAATCTTGAATGACCGTACTTCACATTAAGCATCAAAGAGCCTTACCTGTGCGTCGTCCTTCATTTGGGCAGAACACAAACTTCGACTTCTGCGTCGATCGTTAGATGAAGCAGTCAATGGACTTAACAATGAATCACCGGAACCGTCGCTTGATAGTCGGAAATTGGAAACTGAAAAT…	CGTGCGAAGCTCGAAATCGTTG	GGAACATTGCCTCTTGAACCTGC
III		GE2722	CGR	III:9096455	III:9955971	Yes	III:9096455	III:9955971	1-bp overlap	>>GE2722_oMTG793 NNNNNNNNNNNNNGTAGCTTGGATTCATAGGATCAATTTGAACTTTTATACGAATATCACTGAGGANTATTGCTTCTGTTCCGTTATTGCAATCTCCACCGTCAAAACCACATCCAATGAAACTGCATTCTAAATTACAAACTCCATCGCCTCGTCTTTCAATACAATGTTTCCGAATATGAGCTGGGCATCGAAATAACTCTGATTGACAGTCCAATCCATCGTAAAGACATTCTTCATTATTGCATTCCTGATTACAGACTCCATTTGCGAATTGATCAGCACATCTTGCAGGGTATTGACATTTGGAGAATGGTCTTTGCCCTCCTGAGCAATCACCTCCATCAAAATTACATTCTTCCAAATTGCATTCCGGGTTGCA…	CGGTTGCTCGAAGATTTGCACTG	TGAAGAGACCTCCGGGAAACC
III		GE2722	CGR	III:9096426	III:13737954	Yes	III:9096426	III:13737954	strict	>>GE2722_oMTG942 NNNNNNNNNGTGAGGTGTGATGGCGTTATCAGATGTAACTGCCCCAACGGATTCTCTGGAGATTACTGCGAAATAAAGGATAGACAGTTATGCTCCAGACATCCATGCAAGAACGGAGGAGTTTGTAAGAATACTGGATATTGCGAATGCCAATATGGATACACTGGACCCACTTGTGAAGAAGTTCTAGTTATCGAGAAATCAAAAGAGACGTTAGTTTTCTTGGATACTATAAAGAATGCAGCCCAGAAAAATAATTTATTGAAGTAAAAAGCGGTTTCAATGAAATAAATACCTAATTTTAGCTCAAATCTCTAATTTTGCCAGCTTCGGTTTGTGTGACACGGGGAAGGTGTTAAATAAAATTTCTTTAGCTAAAATA…	CAGTGTGCACTCCAACTACA	GATGCCCTACACCGATCAAATA
III		GE2722	CGR	III:10407341	III:10484199	Yes	III:10407341	III:10484199	1-bp overlap	>>GE2722_oMTG944 NNNNNNNNTATCGTGNNAANNGCNAACCCGGGCAATTAGAGCAAAATAATGCGGTTTTGCGCCATTTTTCACAATAAAAATGAGACATTTTACGGGGAAAACGCTTGAAATTCGATATTTTTGTTTGTTTATAATTTTTATGATGCAACTAAACTTCACGAATCAACTTGATCAATCAATTTATCCGTTTTGGGATGAAAATTCCGGGAGATAAGCGAAAAATTTCTGAAAAATCGATAAAAATTCACCCGGAGGCGTGAAAAACAGCACGGATCCATCAGAAGATCCCTGGCAACGTGCCAACTCGCACGGCGTATTTCGAAAAAAGCGCGACGAGAGAGTGTGTGGCCGTGAGAGACGCGCGACACTCAGACAGTCGGAG…	ATCCGCCGAACTATGGAAATTA	CACGAAGAGCTGCATTGAAATC
III		GE2722	CGR	III:10407340	III:10483792	Yes	III:10407337	III:10483794		>>GE2722_oMTG946 NNTTTNTNNANNNTGTACANANTATTTATTTTTACAAAATAAATAAATATACAAAAATCTAGAATTTATCGAGTTTCCGTTGATTTCAATGCAGCTCTTCGTGCTCCACGAGTTCCATAGGAATTTCGTTGAAAAACGATTTTCCACGCAAAATCGGTAAATAAATTGATTAAATATCGTCTTGTTTCGCGATTTTCAAGGTTCAATGGCGTTTTCAACTCTTTAACAGTTTCAGCATGGTTATGGAGGACGTCACGAATGTCAATCGCAATCGGAGATACATTTCCGACGGACTTGCTGTCGTTAAAATGACATTTTGTAAGAGTTTAACCGAATTTTCGCTTGAAAGTTCCCATTTTTCAGTAAAAAACATGCAAGAAAT…	GTTGAATCAGATTTCAGGCATGTT	GACCTCGTAGCTCTTTCCTTTC
IV;V	sC4					see Maroilley et al., 2021
X	mnDp3	SP123	Free duplication
X	mnDp3	SP123		X:12983109	X:12983352	Indel
X	mnDp3	SP123		X:15422113	X:15796218	Yes	X:15422113	X:15796219	1-bp insertion	>B_oMTG1092 NNNNNNNNAGGCTATGCTGAGGCTTANACTTAGAAGANNACCNTANNGAGTACACTGTCTGGCATTTGCTTATNCATTGAACAAACCAANATTAAGGAAAATTGAATGGCAAATCTATTGACAATTTTTAACTAAAGCCCTTGTTGAGCTGTTCTTTCTGTTGTTTCAATTTTTGTTTAAATAANAATGTTACATTAAAAAATTATTAAAAAACTTCAAAAAAATCTTATAAGTTAACTTAAGTGTCAAATTAAGTTACAATTGGACGGAAAGGGGGAAAATTGGTGGGTCAATTCAAACTGCGGTGCGATATTCGGTAACTTTGTCGCTTTCACGGACACTTTCACGGACAGTATAACCGTCNNNATNACCGTCANNGNCCCTGNC…	GAGGCTTATGCTGAGGCTTAT	CCGTGAAAGCGACAAACTTAC
X	mnDp3	SP123		X:15419295	X:15421670	Yes	X:15419295	X:15421670	5-bp overlap	>C_oMTG1094 NNNNNNNNNNTGAGATTANNGTCTTTANAAAGACGAGTTCCCGGTGAAACAAAAGGTGAACATTTTTCTGCCTAAACATTAAATTGACTACGTTTAGCAACTTTTGCACAAAACTTTTACATTAGGCTTAGGCTTACGTTTAGGCTTAGGCATCGGCTTAGGCTTAGGCGTAGGCTTAGGTTTAGGCTTAGGCATGGGCTCAGGCTCAGACTTAGGCTTATGCTGAGGCTTATGCTGAGAATTATGCTGAGACTTATGCTGAGACTTAGGCTGAGGCTTAGGCGAAGCCTTAGCCTGAGNGTAAGCCCTCTGCCCCAATGGCAGTGTTTTATGNTCACGCTGCTGCNCCCNGCCCACCCNACGGNAAGGTGAAAACAAGTCNNTGTT…	CAGATCGGTGAAAGTCGGTAAA	CTCAGCATAAGCCTCAGCATAA
X	mnDp3	SP123		I:15064452	X:15484795	Yes	I:15064452	X:15484795	2-bp overlap	>H1 NNNNNNNCNTNTGTTNTAAACAAACCTCTTCTGCGGTCGATGATCTCCCAAATCGATCTCTTGAAGCTACGCAACAAAAAGTAGGTATTCATCTCCCCCTTTCCCTTGATCTGTACTCTGCCACGTGGTTCAAACTCAAACCGCCCAGTGCTTTCAGCGCACTTCTTTGCATTCTCCGAACAATGAATTCGTCCAATTGGACTATGACTCTCCATTCTCGAGGAAGTATTCACTGTATCACCGAACAAGCAGTATCTAAAAGAATGACTCATTATTATCACATAACAATATTTAGTGTCCTTGTGTAGTATCATTTCTACCTCGGCATTTTCGCGCCAACAACACCTGCTACAACTGGCCCCGAATGAATTCCTGCACGAATATGAAGAGGGGTG…	CTCAGATTTCTCACACCCTTCTT	GGATCGGTTGCATCGAGTATC
X	mnDp3	SP123		X:15437541	X:15438062	Yes	X:15437541	X:15438062	strict	>I1 NNNNTCNNCANNNNTTCGATAGCACCGGTTGGTGTTCCATTAATTAAATCTATTTCATCTCCACATCGTTTGCCTTTCTACAAATTGTTCAATGGGAATTGAAGGTGGAGTTGCGGCAATGGGGAAAGTGTATATCAAAATAGAAATTTTCAAAAATTTCACAAAGTTCAATTTTTTTAAACTTTTTAGTGACAATTATTTGTCTTTGCCACTCATAATTTTGGAAGTCAACCAAAAAAAAATTATTCTTACATTTTTAATTTCTGATAGTTAATGATGATGTCACATTAAATCTCAAAACTCATCCCGAGCTATGTATGCTTACTGCAACAATTGTAGACGATGACCAACTACTGATTCAAACATTTGATCAGAATGAAAATTTGGTTTTACCA…	CTAGAGCAGTGATGTCGTGTTC	CCAGCCATTTGCCAACTTTATC
X	mnDp3	SP123		X:14998958	X:15009370	Yes	X:14998958	X:15009370	strict	>D_SP123_oMTG1100 NNNNNNCNNCCGACTCTTTGGATCCACTTGAACAGTGTGGTGTCGTGCACCATTTTGATTCATTTATACATATATTAACATAATGTTTCATTATCTCACAACGACCTTGCTTGGTAAGCACGCGAAAATTCCAATTATGATACCAATACCTTATTTTAGCAGGCTAAGGACAAATTTCAACATGTTTGACACGCTTTCCGGAATAATAAAACAATCAAAGGGCACGAAATTAGTTCCTTACAGAATGGCTGATACGTTGACAAGGAAATGGGGTCGCAAGATAGGAGTTGGGGCATTGTAAAACTCAAAGCTTTGCAACTTCTATGAGTATCGATAAAAAAAAGTTGATTTTCAAAAAATTGGAGAAAAAAATCATTTGGT…	GACCTACTGGTGACCTGAATAA	CTCTGAAACTCTCTCCACTCTAC
X	mnDp3	SP123		X:17132213	X:17133014	Yes	X:17132213	X:17133014	2-bp overlap	>J1 NNCNNNNANTTGAGGCAGGAACGGTTCTTTGCTGCTCTATTGCTCTCAAAAACAAAGTGAGTGAATTGGCTGGAGCAACGTCTCCCGGAGCAATAGTGTGTCGAGTATTTGGGAACGAAATTATTCCAGGCATTGAGCTCGTTGAAGGAATCGTAGGGATGAATGCTGGGATCGTTGGTGGAGTTGATTGTGTGGGCTGAAAAGATTATTTCAGTTAGGGTCAACATGTTTGTTCAACTCACTAAGGAGAGTGGCATCGCAGGATGTTGATTCCAAACAGGGAACCGTGACGCTTTCTGTTTGAAGAGTTGAAGGTATCATTTGTTCCTTTTTGATCTAGAGTTGAAGCTGGAACTGTTTGACGTGTCAGTGTGATATATGGAGACGGCAAGGAT…	CAAACCGTCCACCCTATCAA	CCTTGCCGTCTCCATATATCAC
X	mnDp3	SP123				Sanger shows one addition bkp - suggested by reads as insertion before DUP	X:17132318	X:17133117	1-bp insertion	>J1 NNCNNNNANTTGAGGCAGGAACGGTTCTTTGCTGCTCTATTGCTCTCAAAAACAAAGTGAGTGAATTGGCTGGAGCAACGTCTCCCGGAGCAATAGTGTGTCGAGTATTTGGGAACGAAATTATTCCAGGCATTGAGCTCGTTGAAGGAATCGTAGGGATGAATGCTGGGATCGTTGGTGGAGTTGATTGTGTGGGCTGAAAAGATTATTTCAGTTAGGGTCAACATGTTTGTTCAACTCACTAAGGAGAGTGGCATCGCAGGATGTTGATTCCAAACAGGGAACCGTGACGCTTTCTGTTTGAAGAGTTGAAGGTATCATTTGTTCCTTTTTGATCTAGAGTTGAAGCTGGAACTGTTTGACGTGTCAGTGTGATATATGGAGACGGCAAGGAT…	CAAACCGTCCACCCTATCAA	CCTTGCCGTCTCCATATATCAC
X	mnDp3	SP123		X:15434592	X:15436210	Partially		X:15436210		>K1_oMTG1104 NNNNNNNNNNTTTNANTTTTNNGTTTTATGATTTTTTCATTTTTCAAAAATTGAAAAAAAAAACTGCCGAATTNNNNTTGAATTCCCNGGCAAATGAGGGACGCCTTTTTCGAAATTTTTGCATTTTCGGGCTGAATTTCCCAGTTTTTCTTAATTTTTTTCCATATTCGATTTACAACTTTGTTTGTCATTTTTTCNGGCCCTTTTCCGNAAATTCAACTCTGAAAAAAAAGGGGGGGAAAAAAATTTCAAAGTTGGCCTAAAAATCGACCATTTAAGGGTTATTTAAAATTTTTTTCGGGTTTGAAAAACTGACAAACATAGTTTTAAATCAAATACAAAAAAACAAAGCAAAAAAAAAACAAAAAAATTTACCCAAAAAACCC…	AGACCCTGTTGACCGAATTAAA	GGCGAGCAGTAGTGTTGATAA
X	mnDp3	SP123		X:13175974	X:13382739	Yes	X:13175974	X:13382739	2-bp overlap	>E_SP123_oMTG1106 NNNNNNNNNNNNNGGTTGTATTCCNATAGTTCATATTCCCACAAAAATTTGTTTGTCAAGTGCTGCTGATATCATTTTGCCAAGAATTTTTTTGAGATGATGGCGGGTATATTTATACATCTATTTAATTGTTGGTTCGACCGTTATTTTTGAAAAATTATAATTTCATAGTTCAAAATTTTACAAAAAAGCTCTTCTATGTTTCATGTGCCGTTTTATGAAGTTTGGGGTTTTTAAAATTCTTGTGAAATCAATTGAAAATGGAATCAATTGAAATGTGCATACTGTGTTTTTTTGGCGTCTCCTGGAGAGTGTAAAACAACTCAAACTGAGCTAAATACTATTCGCTTAATAATTCCTTTTTGAACAAAAAAAAAAAAA…	CTACCCTCTATCATCGTGTTTCA	TTTGGCGTGTGCCATTTC
X	mnDp3	SP123		X:12974200	X:12984629	Yes	X:12974200	X:12984629	strict	>F_SP123_oMTG1108 NNNNNANTNNNATNGNCTTTTTAAAATGTATCTACGAGGCTTGAGCTTTCAAGAACACTGGCAGTTGTTCATATTTTCACAACGACATAACTCTATTAGTTTAGCTAAACACAAACATTCTACATAGAAATTAAAGACAAATAATTTCAGGAGCTATTTGGTCACTCTGCCCCCCAGAATCGTCGATGCCTCCGGAAATTACATCCCCACCTCAACTTGGAAGCCGCCGCAACTCGTTGGCTCAAAGTAGCAATGGTCCAGGAGTTCCGACAATTCTATCAGTTGCGGATCTCTGTGCATCAAACTCGGCTATGCTCACAAACAGTCATTCCCATCCAATGATCACCGAGGAAGAGGAATCGGGACCAGACTGGTTTCGAA…	CCGATTCCAAGAGGGCATTAG	ACCATTCCTGGTGGCATAAC
X	mnDp3	SP123		X:14943711	X:14954885	Yes	X:14943711	X:14954885	5-bp insertion	>G_SP123_oMTG1110 NNNNNNNTCTGTCNGCTTTTTTGTATGCAGTTACCTTTTGCAGCTTTAGGCTGATAAGTGTAGGTAGCCCCCTGACAGTCAAGAACTACATCCTCTGCGTTTGTAACCGGATATGGGGCATATTGCTCCAGCAACAAATACTCTTGAATTCTTCTCATGGCAACCACAGCTTCCGCCAAGTATCTGGATCCATATGGAATCATTCGGATACCGAAGAGCAAACTTAGCCATTGTCATTTGTGCTCGGCGTAGTGTGAAAATAAGCATATAAATAATAAATATGAACATCAAACTGCATCACATCCCTATAAGCAGAGGATGTGNAGTTCTTGACTGTCAGGGGGCTACCTACACTTATCAGCCTAAAGCTGCAAAAGGTAA…	GTCTCGTCAACTGGTGCTAAA	CCTCTGCTTATAGGGATGTGATG
X	mnDp3	SP123				Sanger shows one addition bkp?	X:14943581	X:14954977	11-bp insertion	>G_SP123_oMTG1110 NNNNNNNTCTGTCNGCTTTTTTGTATGCAGTTACCTTTTGCAGCTTTAGGCTGATAAGTGTAGGTAGCCCCCTGACAGTCAAGAACTACATCCTCTGCGTTTGTAACCGGATATGGGGCATATTGCTCCAGCAACAAATACTCTTGAATTCTTCTCATGGCAACCACAGCTTCCGCCAAGTATCTGGATCCATATGGAATCATTCGGATACCGAAGAGCAAACTTAGCCATTGTCATTTGTGCTCGGCGTAGTGTGAAAATAAGCATATAAATAATAAATATGAACATCAAACTGCATCACATCCCTATAAGCAGAGGATGTGNAGTTCTTGACTGTCAGGGGGCTACCTACACTTATCAGCCTAAAGCTGCAAAAGGTAA…	GTCTCGTCAACTGGTGCTAAA	CCTCTGCTTATAGGGATGTGATG
X	mnDp3	SP123		X:12806419	I:15069556	No – repetitive region
I	hDf8	KR1233		I:836490	I:1063262	No
I	hDf8	KR1233		I:1113085	I:1119781	Yes	I:1113085	I:1119781	2-bp overlap	>A_oMTG803 NNNNNNGCNTNNNGCTGNCGNNNNTGATATGCTTATGCTGACGTGCGCTTATGCTGACAAGAGCTCTCACGAGAATTTCGTGATCCAAAAAACACATTGAAAGCTTATATCAGGACACTTACCGATGTAAAAGAAAACCGAACCTATCCAGATTTAAAATGAGAGTTTCTATTCTACCAAAAGATGATAGTGAATATTCTAAAAGAGTTCAGGTGGGCTGTTTTCTAATATTTGACCAAGAAGTGTTCGGGCAGGCTCTGCAATTTTCTCGAAGTTGATCGATTTTTTTCGTTTTTTTTAACCCTATTCATTTTACTCAAGATTATTGAAATTCACTGAAACATTCATCGATTTTTCTTAAAATTATGGATTTTTAAAAACATTTTCT…	TGCCAACTATCCTATGCTGAAACC	CCGGAGGACACTGGAATTGC
I	hDf8	KR1233		I:1802224	I:1802589	Yes	I:1802224	I:1802589	1-bp insertion	">KR1233_oMTG807 NNNNNNTNCGATTTATCGCATCCGTCAATTTTCCCATAAACTTCTTAACAGTCACCACTGAATTATCTTTCGAAGATGCAAAGAAACGCTTTGGCTGGCAAGCTGGGATCTCTCCACTAATCAACACACGTCTCTTGGAGCAGAATACAAACTTGGCATCATGAGTTGGAACTCCGAATCCAGACAAGGCGACCAGGTACTCGATTTTGTACTCCGAGATGAAATTGGGACAATTTGCGTTTTTTGAAAGAGCTGACTGATTGTGAGAACATGCTACTGCAACATTCTGATCAAAAGGACACTTTACTAGTTACTTTATAGGATTGCCGAATTGCTCCACATGCTTTAGGATATTGAAGCATGATCTTATGCTGGTCTTTTT…	GCATCTGCGAAAAGCCCTCC	ATCTGTACCGTGACCGGGATC
I	hDf8	KR1233				Sanger shows one addition bkp?	I:1801798	I:1802159	strict	>KR1233_oMTG807 NNNNNNTNCGATTTATCGCATCCGTCAATTTTCCCATAAACTTCTTAACAGTCACCACTGAATTATCTTTCGAAGATGCAAAGAAACGCTTTGGCTGGCAAGCTGGGATCTCTCCACTAATCAACACACGTCTCTTGGAGCAGAATACAAACTTGGCATCATGAGTTGGAACTCCGAATCCAGACAAGGCGACCAGGTACTCGATTTTGTACTCCGAGATGAAATTGGGACAATTTGCGTTTTTTGAAAGAGCTGACTGATTGTGAGAACATGCTACTGCAACATTCTGATCAAAAGGACACTTTACTAGTTACTTTATAGGATTGCCGAATTGCTCCACATGCTTTAGGATATTGAAGCATGATCTTATGCTGGTCTTTTTT…	GCATCTGCGAAAAGCCCTCC	ATCTGTACCGTGACCGGGATC
I	hDf8	KR1233		I:1966186	I:6412411	Yes	I:1966186	I:6412411	1-bp overlap	>KR1233_oMTG809 NNNNNNNNNNNNNNNGGNANNNNNNNNGGGTAAAAAAGAAAAAAAAAGAAAGAAAACTAGTAAAAGCTCGTGATGCAAAATTACAAGATTATAGCAACAACAAAAAAATTCGAAAAAAAAATAATAAAAATGAAGGAAAAACGAATATTATTCCTATGGTTAAGGGGTGAAAATGAAAAAATTTTTTGAGACAATTCTGTTTGACTACAAAACCAGAAAACCCCTTATTGTGAATGACGAAAAGACGCAAAGATTCGGAAAAACGATTTCCAGGCTTTTGAATTTCAGTTTCTTGCAAAAGAACAATGAACTTTTAAAATCACGAAATTGAGATTTTGTATTGAAAATTAAAATTCGATTTTCCAAACGCAAATTTCAACGAA…	GTCAGCGTCTTTGGCGTCTTC	ACGTGTTTCCAAGACTCTACGCTC
I	hDf8	KR1233		I:2814292	I:6915195	Yes	I:2814292	I:6915195	strict	>G NNNNNNNATAGGCTCATGTGCTCAGCGGTGGGACTTGCGGCTGGTTCAGTGCCTGAAAAACAAAAAAATANNNGAGAACCTCAACATAAAACTTTTCTTCGATTTTTCAGGGGTTTAAACAATATGTTAGATTTCAAAGCAAAAAAAAATGCTAACCTGCTGAAAAAGTTCAACCGCCGCTAAGGTGTCGGATGAGATTCCGTTTTGAGTATTGACGGTAAGTCGTTCCTCTCGCGGAATTGCCATATTTCTGTATAATACTTCGAGAACTATGTTCATATCAATTTTGGATGGATCTCGAAATGCTTGTAATATTTCCTTGGCAATACTCGTACAACCCGATGAAAATCCCTTCTCAAATCCTCGACGATAACTGTCAGTAGATGTCTGAAATTA…	AAAGTGTCTGTCGTCTGTTCTC	CAATAACCATACCATCCTCATCCT
I	hDf8	KR1233		I:3294801	I:3326157	No
I	hDf8	KR1233		I:3294795	I:3294917	No
I	hDf8	KR1233		I:3315217	I:11034814	No
I	hDf8	KR1233		I:3535046	I:3536437	Yes	I:3535046	I:3536437	1-bp overlap	>1A NNNNNNNNNNNNNNNNANNGNNGANNGTGNAAATTANACTTGTAAAGTAGATATGCGCNCTCNNCTTNAATGAGGGATTGTTAGAATTGGCGGTAAAAAATTANACCCTTNGATTATTATTTCAGAATTTCATTCTTGTTTTTTTAAATTGATGTTTTGTATTCTAATTAGAGAAAACGTTTTTTCGACATAAAAATCATGAAAACAGTGGAAAAACATTAAAAAAAAACTACAAAAAATCTTTAATTGGAGCGCGATTGCACTTCATTTTCAAAAGTCGAATTTTTCGTATCCTTATAATATTCCAACTCACTCTAAAAACTGCGTATTTGCCAATTGTTCAGAGTGATCTGGTTTCAACGACTTCACAGCAACATCCACTCCCTTCCACTTCG…	TTGTCAGCGTTTTTGCTTCTCTGG	AGAGTACATCTCCCTCCTCGACAC
I	hDf8	KR1233		I:6419925	I:6910540	Yes	I:6419925	I:6910541	strict	>I NNNNNNNTCNGTCGGTGCTCACATGGNATAATGAATGGTATACACTTGAATTGCTGTACAAAAGAGGGTTGAAAAAGTGATGTTTCTCATTTCTGTACCCAAAATCTTGAAATTTTAGTGCGTTTTGCCAACATTGGGCCTAACTTCTTCAAAAAAACGTTACTTTTTTATCTACTCCATGAGAAATTGAGAAGCAACATTTGGACTGAAAAGTTCGTGATTCCTAAAATTGATATTTTGTGAAAATAAACATTTTTAAATGCTTTTGTTCTTTGAAATTTCCAATACGTTACTTCTCTATTGTTTTATTGTTCTCATTGACCTGTTTAATAAACTACAAAGAATATAATAATGTTAGATATAAACGAAAACAATAAAATCTTCCTCATTCCCATT…	ACGAGAATGGGTTCGATTAAGG	TGCTCCAGTTTCTGCTCATATT
I	hDf8	KR1233		I:6420479	I:6915192	Yes	I:6420479	I:6915192	1-bp overlap	>E NTNNANNCNTGNGANNNNCCAGTAACTTCAAGGGCGCGCTGANATTATTCGGGCGTCTGAGGCGGATGCCCAGCCCNAAATCGATAACTTGGGCGGTTACAACTTGCTCGGGGAGCATAACTCCCATGGATGTGAAAGACTGGTGAGATTGTGTAACTGATCCGTGTTCGTTTTGTTGAATGAAACCTTGCTCACGCGATTGCCTAATCTTTGTTGAAAACATTAATTATAACATTTAAAATTCCCCGTTTTTTTTCTAATATTCTCGAACTTGATTTCCGACAGTTCTTTCTTTTAGTAAAAAATTATGTTAATGTTTTCAGTTCGCATAATATGTCGAATCATCACTCGAGCTGTTCTTCGAGAACTGGCGGTGCCCACCGTCGTTGTGATTGT…	CAATTTCTTGACCGGACGCACC	CACGCGCCCTTTGAAGTTACTG
INV-INV CRISPR-engineered balancers
I	tmC20	FX30235	INV-INV	I:114578	I:8210593	Yes	I:114579	I:8210593	strict	NNNNNNANNNNNNGNNNNNNNATTTGAATTCGCCAAGAGGAATTTCACCGCAGCGCGTGCAAAAATGTCTGCATTTNNNNGTGAACTTTGAAGTCTCTATGGACTCAATGCACCATATATGACGCGCAAATAAATTTCGAGGAATTCTGAAAAATCGACAATGAAAAATCAATAATCTTCAAGAACCAATTTATCGAATTTTTCACATAATTTCGTCATTTTCCTTTTTTTTCTCCTCCTTTTTCTCTTCCTTCTTATCCTTCTTGCTTTCATCTTTTTTCTCGTCCTTCTTTTCGTCAGCCGCCGTGTAGGTTGTTCACTGTCTCACAATGAAAGCACGAGACGACAAACACCTTTCTAGCGCAGATTTCTGCCGTTCTGTACACAGCTCGCTGCACT…	TATTCAGCTCGACCAACGCCTC	GGGAGCTTCGGAGATGGAGTAC
I	tmC20	FX30235	INV-INV	I:4709755	I:8256469	Yes	I:4709755	I:8256469	3-bp overlap	NNNNNNNNNNNNNNNNNNNAGTCCGAGATGTGTAAATTCCTCGAAACTGCATAAGACTGTTTTTCAAAATTTTTTGATACTTTTGTTTGAGCTTTTATTGTTATTGTTGATACTGTTATGGGGGACTTTTGTTCCTTTACAAATAAAATCAAAAATTATTAACATTCATTGTGTACATTTCAGATATATTAAGCAGCTCTTCAGAGATTAATATTTGGCATTAATTTTCGGTTTTCTCAAAGATCCAGTGCGCATCTTTCCTCGACAAGCACCATCTCCTTCCAGTTGCCTCTCGAAAATCTCAAAATACATGTCACGCCCCCAGGATCCACCAAATCCATCGATCGGAATCGACTTGTTGTGGGCTGACCCTGATCAATGGGTGAAGGGATGGCAGGC…	GCAATACACACCGAAGCAGTGG	CATGGACTTCGGAGTTGGCTTG
X	tmC24	FX30237	INV-INV	X:8467140	X:15829281	Yes	X:8467140	X:15829281	2-bp overlap	>>FX30237_oMTG644 NNNNGNNNNTCGTGGATCACTGCATCCGCATCTATCAATAATCAGTTCTTGAAAACAAGTACGATAGCAACCCTGGAATTAACAAATTTTAATGTTTTCCTAACGACCACAAACACAATCATCACTTTTCGTATAGTATGGTTGCGTGTACCATATACTTTTCTTTTATAATTTTTCATTTTATAATAACTCGTGTTTTGGTTTTCTGAATGATGAATTAAAAACGTACTTCTGTTGAGTATGCATAACCCTTGTAGATGTAGTTTGACGTGGCACCATCCTCTACACAATCCCCATACGACGGTACAAGTTGACAATTTTTTTGGGAAAATACATAAATTGATTGTTTCAGGAAGCAGTAGAAGTAGTATGACAGATGAA…	GAACACTTGACACGGTTGAACAC	AAAGGTGCATAGTAGCCGGAC
X	tmC24	FX30237	INV-INV	X:12460309	X:15842089	Yes	X:12460309	X:15842089	1-bp overlap	>>FX30237_oMTG646 NTNNNNNNATGCAAGCACCCGGTGGCTGAACTCCATTCTCTTTCCGCTAGCATCAAATTTTCTGTAATCAATGTGCCCGTCGATTGGTGGCTGAAATTTTTGGTGTTTAGATTTTGTTAATTGTGAAGAGATTACAGTTCTCATTTCTTGCTTGAAGTTTGTGCCCATGTCAAGTGGTGCCGGATAGAATTGTGGATGAAAAGGTAAAACGTCTTCTCGCATTCTAAACTTATCAGTTGATATTTTACAACTGTCTTTAAAAGTCGATCTACCTGGGCTGCTCAAATGATTTCTCCGCTAATAAAGACGGCTGAAAAAAAGGAACATATTGAAGTGAATTAAAATAAAAGATTTTTGCAATTTTTTATTCTTGCTTATGCT…	GTGAAGCCCGTTAGCATGAGTTG	TCGTCTTTGTCGTCTGCGGATC
IV	tmC25	FX30257	INV-INV	IV:749886	IV:3418440	Yes	IV:749886	IV:3418445	1-bp overlap	>>FX30257_oMTG648 NNNNNNNNNNNTTNNTTTNANTTAATAACTAAATCGGATTCAGCTCACCGAGAGCTTCAATTAAAGTATAATTATGCCTAGGTTTTGAAAAAAAATTGGGTTTCGCCACAGCTAACAGGGTTACTGTAGTTTTTGCGCCGAAACTCAAATGTTTGCAATTTCAAGCAAAATAGGTCATGATTATACTCAAATCAACGCTCTCAACGAATTCCGAAATTTAAATAAAATTATGTTAAAACTCACGTGATAGCAGTTGGCTTCTCATTCATCGCCACTCCATTCAGCCCACTATTCTGTTTGACGACCCGGCAGACATTCAAAAAAAGTAATCGATAATAGGGCGGTTTCCAAATCCAGAATGGACGAGTGCTGCTCACCATT…	GCGATGAGATCCGGGAAACG	CCCTCCAGGATCAGCCATAATCTAC
IV	tmC25	FX30257	INV-INV	IV:888732	IV:7203027	Yes	IV:888732	IV:7203027	strict	>>FX30257_oMTG650 NNNNGNNNGTTTTGGACTTTTCCTCATTATCGAATTTACCACAATGAAGAAAAAGTCAAATATTGAATCCTTGAATACTTCAATTTTGTAGAAACATGTTTTTTTCAAAAAATGTATTTTTCAGGTCAATGTTTATCAAACCTAACAAGTGACTCTGGAGGTTACCACCATCTACACGAACAATGTGAATGTCGTCAGCCATGTCATGAAAAAGTATTTGAGACTGCTTACTCTGCATCTGCATGGCCCAGTCAAAATTTCAAAATTGGTTGGTTTTTCTATGACTCATATCTTTCTCTACCACATAATTTCAGGTACCGACTGCCCCGCCGTATCAGATATTTTCAACGACACTGAAGCTTGTACCGAATATTATCGTCA…	AACTGAGCGGAGTGCCAAATG	AAAATCCTAACTCCCTTACCGGAC
V	tmC3	FX30133	INV-INV	V:6484110	V:12142846	Yes	V:6484110	V:12142846	33-bp insertion	>>FX30133_oMTG831 NNNNNNNNNNNNGATACAATTAATGACATACCTTTACGGAAGCATTACTCAAAATCAAAACGTGTTGGCGANNTTATTATTGAAGGGAAACCAGGAACTTCGTTTTACAAGTACATAGATAATTTGAGAAAAAAAATTTAAAAAAAAACGCTTTTTTAGAAGTGAAACCAACCTAGGAGATCTAGGAAACCTAGGAAACCTAGGATAGTCGTATCTACACCAGTCCGCCGACTTCTCAGGAAGCTCGACGAGCAGATTAGAAACCGGGATAGTGACACGGCGCCAGAACATAGTGATGCTGCACAAGCCTATGAATGGGATGAGTATAATGTAAGTGTTCAAACTGTTTAATGCAGAAAAAATTGAACTTTAAAACTTTGA…	TGAAGTAGCTGGCGAAATAAGA	CAGAATGATGTGTAGGCGAATTG
V	tmC3	FX30133	INV-INV	V:8938061	V:12197769	Yes	V:8938061	V:12197761	5-bp insertion	>>FX30133_oMTG833 NNNNNNNNNNCGTGGTCCTTCCTCTCTGAATTTGAACGTATTGAATGGAAATAAACATGTGAGAATTCATACNNCTGATATGGTATAGTGCTTTCTAAATAGACTTACCCATCTGGTCCGGCAGATCCTTGGTATCCTGGAACTCCGACTCCTTTCACGACTACCTTTCTTCTCCAGTGGTTTCTCCTTCTTCTCATATGGCAATGGAATAACTGCTGGTCTCTCGGGTACCTCAGGTTCCTTTGGTTCACGAGTACGAGATGGTGGTCGAGATGAAGCTTTTGTTGACGGAGGAGTTGTCTGACGTTGTTGAGCTTGTTGTGGTTGTTGCTGAGAATATTGTGGAGGAGCTTGATTCTGCTGAGAGTTGCGTCTTAATGT…	TTACAGTACTCAGCATCCTTTCC	GGATACAGGAGAAGTCCAACAC
II	tmC6	FX30144	INV-INV	II:2331869	II:2758154	Yes	II:2331869	II:2758154	1-bp insertion	>>FX30144_oMTG690_Inversion1 NNNGNTNNNANNNNNNNNNNNNNTNNNGNNGTGGCAATGCTTCAATGTCAAGCTCTCTGGAGCCAGATGTAGGTTTTAATGATAATTTAGCATTTGTATTATAGGTACATGAATTTCAGAATATAACCCTGTGGCTTTGAATGTTCCAAACAAGGCAGTTTTTTGGTTTTAAAGTTTTCAATCATTTTTTACTTTGTACAAATACCGATAAACAACCGAAAATTCAACTCTCCAATCCTGATTTTTTTGGCCCTTTTCGGGCAATATAAATTTTTGAAATGTCTAATTTTTTGGTCAATAATTCTCACATCCCAAACTGGCCTAAAAATGTTAAAAATGTGGGGTTCGGTGTCAGGGGTGCTGGGTTCTA…	GCTGTGGGTAAGTGGATTTGGAAG	CACAACAGTCCCATCTTCCTCTCC
II	tmC6	FX30144	loss	II:2332242	II:2758243	No split reads				>>FX30144_oMTG692_Inversion2 NNNNNNNNATAATGACATTTCGGACTGTACGGAGGGTTGGAAAAATAAACGAATGGTCTTGGGAGTTCTCCCGCTGACACTGCGATAAGACGATAACAATTTGGTGACCAAGAATACACGGAAACCGGTAAATATTTTTTGCTGACTCATATCAGTTTAGATACACCATTTTCAACACTATTGCTAATTCTATGTGGTCAGTTACTACGGATTTCGTAATAGTTTTTCGTAAAATAAAACGTTTTCAGAGCCTGGCGCCTGCCTGAAACCTGCCGAGCACCTATAGCACTGTTTGAGCTCAATGGAGCGCAACTTTATTTCATTTTAAATGTCTAGGCAAAATCAATCAAGTGTCGTATTAATTGGGTGA…	CGGTGGCACTTGAGAAATCTTCG	GAGAAGGGCAATGGTGGACG
II	tmC6	FX30144	INV-INV	II:2671237	II:6912298	Yes	II:2671237	II:6912298	1-bp overlap	>>FX30144_oMTG694_Inversion3 NNNNNNNNNNNGGGCATTCAATTACTATCGAGTTATTCAGAGGTTGATAGATATTTTAAAGTTTGATAAAAAAGAAATATCAAATTTCAGATTTTCTTCTACGATAGCCGCTCAATTCTTCGGACATGATCATTTGGATTACTTTACAGTTTTCTATGAGGATATGCATAACGTGTCGAGTAAACCAATAAGTGTAAGATTTTTTGAAATTGATATTTATCATAATTCCTTTCTTACAGGTTGGATATGCTTCACCTTCGGTAACTACTTTTGAGTATCAAAATCCTGCATACAGAATCTACGAAATTGATCCTTATAATAAATTTGTAAGATATCTGGAAAAATTACTAGAAATTTTAATTATGAGTCC…	ACTTGCACATATTCCACCTGGAG	TGCGCTCTGCACTATTGATTTCG
Unresolved balancers
V;X	mnDp1	SP423	Duplication	~ X:13794001	to the end
I;X	hT3	KR1876	Translocation
* qC1 structure was previously published in Edgley et a., 2021, based on the sequencing of multiple strains (see Li-Leger et al., 2021)
GE2722 was sequenced in this study and we retrived the same breakpoints as previously published.

## Sheet: Supplemental_Table_S5
Additional SVs
Strain	Type	Breakpoint 1 (Bioinfo)	Breakpoint 2 (Bioinfo)	Length	Confirmed	Comments	Genes	Breakpoints (Sanger)	Breakpoints (Sanger)	Accuracy	Sanger	Primer 1	Primer 2
Homozygous Deletions
DP246	Homozygous deletion	I:12824847	I:12825125	278 bp	Yes		gsk-3	I:12824847	I:12825125	1	>>DP246_oMTG771 NNNNAATTTTNANNNNNNNGAATTGGGGGGACAAATACTATATTTCCAAAAAATATATAAAAAATTTCCNCAAAAACAGGGACATTGGCGTTGTGGGGAGACACTTACAGAGCAAAAAAAAGAAAAGAAAAAAAGACAGAAAATATGGGGGAGAGAGAGAGCAGTTTTCAATTCATTTTTGGCTAGAAATTTCTTTAGAGGAGAGCGTGGGAACACAAAATCGGGATTACAAAAGAAAACGGCGGCGGAGGGGGAGGAAATGTACAGAAGTCGCGGATTTTTTCAGGCCTTTGGGCCTAGATGAAGTCCTAAAAAATTGGGCCTCAAAAATTAGGCCAAAGGTTTAAAAAACTTTTTTTGTTTTAAAAAAAACTCAAAAGAAA…	TTCAGTTGGTGGTGGTGGTAGAG	GACAAGCGGTGATGTGGCTG
GE2722	Homozygous deletion	I:11148805	I:11149851	1,046 bp	Yes		clec-95	I:11148805	I:11149851	1	>>GE2722_oMTG787 NNNNNNNNNGTNNTGTCATGNNTAAATGTTTATTTGAAGTATTCTATAGTAGATATGATGTATGGAAAAAACTTTTTTTGGTCAATTTTCTCAAAAAAAAAAATTGAAAAAAAATCAATTTCAATTTTCATACAACTTTGTTAAATAAGTTAATCTGTATGTTTTCCATATTAAAAACCTATTTAAAATCTATGATTGTTACTGAAAATTCAAAAATATTGAAGTAAACTTAGCGTTTTTAAGTTGAAAACAGTAGGTTCACATATGCAATCTTTTATAATTCAAAGAAAAAACACATGGTTTTGTTGAAAAACTATCAAAAACTTTTCCATACATTTTACTTTCAAAAAATATGTTTAAAATTTTTGTAGCTAATCAGGTT…	GGCTGGTTACGTGTGTGGAAAG	CGGCATGTAATACGGCACATTGG
DP246	Homozygous deletion	III:12235211	III:12236131	920 bp	No		grl-15
DP246	Homozygous deletion	IV:3052310	IV:3052413	103 bp	Yes		Y67D8C.23	IV:3052310	IV:3052413	1	>>DP246_oMTG785 NNNNNNNNNGNNNNNTTNTNGTNCNNNGNNCNATGNAGACAGCCTGACTACACGAGAACGAGATAGTCTTTAAAAAAANNNANNATAAAAAAGTTTTCACGTTTTTAAATTCTAGGAGACCGCGGCTACGTTAAAAGAAATATTATCCACGTCGTTGTGATTTGTTCTGAGAAATTTCGTAAGGACGTTAAGCTTGTGGCGAAGGCGAAGGTGAGAATATTGCGAGTTATATTTAAAAAATTGAGAAAAATTAAGCATCACGAAAGTGTTGCGTTCGCCTACACTCAAATCCTCGATTGCCTATGCGATGATTTCTTCAAGCTGCCATCAACCGGAATCGAGCAGGACAACATTGATCAGATAATCGGAAATTTCTCGCAGTA…	GTCGTAAATCCTGCCCGTTTGG	GGGAATACAGAACAGCAAAGCACG
RW6002	Homozygous deletion	IV:5370371	IV:5371720	1,349 bp	Yes		F41H10.3	IV:5370371	IV:5371720	1	>>RW6002_oMTG747 NNGNNNNNNNNNCTGGTGGCACTTGATTAATCATTGTTTTCTCCAAATTCTCTTTTTGAACAAGCAGGGCNCGTTGTTTTGGAGTTGATGAAGAAATAAATCGAGTTGGAGCAAATAGAGGTGGCTCAAGAACTTTTCGAGGTGTTCGTACTTTTGCAGCAACTCCGAGTAGAGCTTCATCCTTCGGTTTCCTCTTTCTCCTTCTTCCGTCCTCTTCGATAAGAAGCTTGTAAGCCTGAAAATTTATATTTTAATTCATTGTCATGTATATAATTTCTCGTCGAAAAAAAACCTACCGAACTGTGCATATGCTTGTCCACAACTCGATTATTCTCCATTTGAATTGCTGATAAATACTGATTCCGTCCTTTCGTAGTGCTCA…	GAGTTGTGAAGCAGTCTGTTGTGG	CTCCTCGAAACAACGCAGCAAATC
FX30237, FX30257, FX30144, FX30133, FX30235	Homozygous deletion	I:12586101	I:12586223	121 bp	Yes			I:12586101	I:12586223	1	>>FX30133_oMTG829 NNNNNNNNNNNCNCNNNTACANCCACGACCACCACCCCTACAACTACGACCACCACCCCTACAACTACCACCACCNCNNNNTNAACCCCCCTTACGGAAGTTTTTCGAACATCCACCACTACAGAAGCTCCTTTTTTCACCACCACTACCATTGTAACCACTCCTACTACTACAGAATATGATGGACCTATTTAAATCGATTGCTGACTTTTAATGAATATATTCGTTAATGTTTAGTTTTATGATAGCAAACGCTGAAGCTTACTCGACCCGTTCTTTGTTGGCGGCGCGGATCACAGTTTTTCAAGCTTTTGGGACCTTCCGAATTTATTTTTGCTAGCTTGTATGTCGCTGTGATGAGGTATGTATGTATATCAGAAC…	CCACTCCTACAACAACCACTAC	CCGTCTCATTTCTAGGGAGTTTAG
FX30237, FX30257, FX30144, FX30133, FX30235	Homozygous deletion	V:18429890	V:18465644	35,754 bp	Yes		13 genes	V:18429890	V:18465644	1	>>FX30237_oMTG737 ANNNNNNNNNTNNNNANNTCAAACTGCTTATCTGAACTCATTTCTAACTCAAACTTGATTTGAGCTTTGTCAAAAATTCCAAAATCTGTTGATTTTAGTAAAAATCGTGAAAAAAAACGGGGGGTCCTATAGAAGTTTCACACTGGATTTTGACGTTTTTTCCAGCGCGACCTCAGTTTTTGAGATAAACTTCTGGAAAAAAATGTATATAGGTTTTTTTCAATTTAAAAACGAATGGCATTAGCAGTTTTTCAAAAAAATTTTCGGAAGTTCCTCAAACCTTCAAATTAGGGGGGGTCCTATAGAACTTTCCCACACTGTATATAATTTTTCGGAAAATATTTTGTTGGTTGGCAATTTTTTTAAAAATTCGCAATCTAA…	GAACCAGTCTGGAGATCCCAC	TAGTGGCTCAGTAGGGTAGAGG
FX30133	Homozygous deletion	V:15826754	V:15886806	60,052 bp	Yes		32 genes	V:15826754	V:15886806	1	>>FX30133_oMTG835 NNNNGGNNNNTTCAATCTGATTTGATATTAATTTATGTTAGATTTGCGATTGATGTGGGATATAATTTGNCNGNNAAGTCTTTCTCCATTATTTTAGAGAGGAAAAAATAGATTTGAAATAAATTTTTTGATGAAAATTTGATTTTAAATGTTCCAAATTTATTATCAAATTTCAGTCGCAATCAACAAAACATATTACCTGGCAGATATTGTTTCGAAAATATTTGTGTTCAAAAATGTGACGAGATCATATCACAGGAGACGATTGTTTTCTACAAACTATGCGTGCCTACGAATTGGTTATAAGAATATTAAACGGCTCCTTTCGATAATGAAACTGCTTCTGGTACTTTTTGTGAGTCTGAAAAAAAAATTAGATTA…	TTTCTACTTGCTCTGGTCGATATT	CAAAGTCCTACCCTCAGCTATTC
SP127	Homozygous deletion	V:4694692	V:4694952	260 bp	Yes			V:4694692	V:4694952	1	>>SP127_oMTG964 NNNNNNNNANNNCGTAGNTCAAGCCGCTACAGAAAATTGAACCTGAATATCCAGCAAACAAAATTCCAATAGTATTCCCTCTTAATCGTTGCCTTTTAACTCACTGTATATAATTCAATTTTCCAGATCCCAAGTACCCAGCTCACCGCCGTCGGGTTAACTCCACGAGCCAGTCGAAAATCAGCAAGAAGCACATTCGAAACAACACGCACCGACTAGTTTCTAATTACATATGTTTTTCTCTTCTACTTAATTCAATTATTTTCCTTCCCATTGTTACTCAATTTCTCGGTGTTCCATTTCCTGTGATCTCCCCCCAGTCTGCCAATTTGTCCAGTGTGTACTTGTGTTGTTATTATCTTCGTTTAAAGTTCAATGAATCA…	TTAGAACTCTGCGTCACTTCTC	GCCCTTCTCGTCGTCTTATC
SP127	Homozygous deletion	X:16029231	X:16029350	119 bp	Yes			IV:16029231	IV:16029350	1	>>SP127_oMTG972 NNNNNNNNNNATGCNNTTTTTCNTGTTTTTTTATTATTGCAATTTTAAGGCTTTCAGGTTTTTACATCCTGAANCACATTTACGGTTCAACTAAATTATTTCTGAGTTTCTGGGCAACCGAAACCATTTTGCATCAAAAAATAGATATTTCAACTTATAACTTGATTAAACTTTTATTTTCAAAAAAATTCTTGAATTCTAGATTCCAGATGAAATTTCCCATCCGAATTCGTCATTTAAAACATATTTAACTCTTAAATAAACTCTCGAAATTCAATGAACATGTTGTAGAATTTATAAAATCCAGAAAAGAAAATGGGTCATTGAGAGAAGACTAGCCGCGAACTGTCCGAAGTGAAAGGAGGAGTGTAAGCGTCCAGTTA…	ACGTGATCACTAGGAACACAAG	GCACCTGCATCAACACTTTAAT
VC471	Homozygous deletion	I:1802224	I:1802589	365 bp	No		Y71G12B.5
VC471	Homozygous deletion	I:2767238	I:2767336	98 bp	No		sop-3
VC471	Homozygous deletion	I:6345830	I:6349156	3326 bp	No		bli-4, K04F10.8
VC471	Homozygous deletion	V:14618143	V:14618203	60 bp	No		F43D2.12
VC471	Homozygous deletion	V:18232873	V:18232949	76 bp	No		R10E8.7
VC471 and SP123	Homozygous deletion	V:18768629	V:18768693	64 bp	No
VC528	Homozygous deletion	X:4537513	X:4537685	172 bp	No		nhr-35
VC528	Homozygous deletion	X:13435204	X:13435335	131 bp	No
VC528	Homozygous deletion	II:116190	II:116270	80 bp	No		K10B4.3
VC528	Homozygous deletion	III:364091	III:364382	291 bp	No
SS746	Homozygous deletion	V:19696586	V:19696875	289 bp	No		Y43F8C.13
SS746	Homozygous deletion	V:797342	V:798129	787 bp	No
SP123	Homozygous deletion	III:8604408	III:8605342	934 bp	No
SP123, KR1233 and VC528	Homozygous deletion	II:10440527	II:10440558	31 bp	No		E04D5.4
CB3475	Homozygous deletion	III:12641313	III:12641749	436 bp	No		pqn-80
CB3475	Homozygous deletion	IV:15905251	IV:15905921	670 bp	No
KR1233	Homozygous deletion	IV:15504153	IV:15504315	162 bp	No		acr-24
KR1233	Homozygous deletion	V:14238260	V:14238460	200 bp	No
KR1233	Homozygous deletion	IV:14678541	IV:14678678	137 bp	No		Y57G11C.31
KR1233	Homozygous deletion	IV:13557888	IV:13557957	69 bp	No		Y45F10B.13
KR1233	Homozygous deletion	IV:13332806	IV:13332947	141 bp	No
KR1233	Homozygous deletion	III:3023850	III:3024684	834 bp	No		daf-2
KR1233	Homozygous deletion	III:2362280	III:2362376	96 bp	No
Heterozygous Deletions
FX30237, FX30257, FX30144, FX30133, FX30235	Deletion (insertion?)	I:11849276	I:11851612	2,336 bp	Yes		ced-1	I:11849276	I:11851612	1	>>FX30237_Highband NNNNNNNNNNANNANTTNNGCTTACTCGACGCCCGCGGCTACCTGGACCCACATCCGACAATCGAAATCCGAGTTCCGAAAAAATCGGAAAAATCGATCGAAAATCATTAAATTATCGATTTTTTGTTCCACTTCTTCTTGTCACCGGTTATTAAGCGGCTACGGGTGCATTGATTTTCCGAGAAAATGCAATAAATTCTTGAAAAAAATCACAATTTTCATATATATGTATATATATGTTACAAAATTCTTCAAAAAAAAGTGAGTAAAAAGTACATGAAATACAAATACAACTATATATATATAGTTAGACTATCCGTAAATAAAGCACAAAATGTGCTCCGGGCTCGGGGCTCCCGGAGCTCATGAAAAAAGGACGA…	ACATTTATCGCTAGAGCGCGTTTG	ACCCATACGCCGACATCTCATC
BC1217	Deletion	IV:12417282	IV:12418048	766 bp	Yes		5 genes	IV:12417282	IV:12418048	1	>>BC1217_oMTG739 NNNNNNATGANGNATNNATNCGATGCGACGGTGAATTTTCTCGCATGCATATACATCTAAGCACACCTTCCCTTTTTTAGTCGGGTCCATTCCGTTTTTTATTTATTTCTTATTCTTCTTTTTCTGTCAAAATGTTTCCACGTTGCTATGTAATTTCGTCGACTTTTAGAGCACCCCATCAGATATCCTTTTTCTTTCGTTTTTATCCTTCTTTTTCTTCTTTTTTTCACTGCTTTATTTGTTTACACCGGATTACACTTTCCAATAGTGAAGATGAAATTTCACGTTTCAAATTTACAAGAGAGTGTAATCTTTAACGTACACGCTCCAGGTTTTCTCCAGATGCTTTACCCACAATTCTCGTATTTTTGAAGCAAATTAG…	GAATGCAAGTGCCGGAAGAGAG	TCGGGTCGCAGGATTCAGAG
RM2431	Deletion	I:14338214	I:14338234	20 bp	Yes		F49B2.6	I:14338214	I:14338233	1 bp apart	>>RM2431_oMTG855 NNNGNNNNNTTGGAATTTATCAGTACTCTGTTTANTAGAAAAAGCACCGAAATTGCAAAATTTCTGAATNNNANCAAAATTTGTTGTCAATTCAGGTTCTGGTGTACCAGGTAAACATTCATTTGCGGCATAAAAAACGTGGTATTGTAGATCAACGGGGTCTTGTAGATTAACGGGGTCTTGTAGATCAACGGGGTATTGTAGATCAACGGGGTCTTATAGATCAACGGGGTATCGTAGATCAACGGGGTCTTATAGATCAACGGGGGATTGTAGATCAACGGAGTCTTGTAGATCATTGTTCAGACTAGCTTAACGGGGTCTTGTAGATCAACGGGGTCTTGTAGATCATTGTTCAGTGTAGCTTAACGGGGTCTTGTAG…	CTGAAGCCGTGCCAAATAGA	ATGTCCACCTGAAGGGAATTG
DP246	Deletion	III:5402384	III:5402453	69 bp	Yes		Y32H12A.8	III:5402384	III:5402454	1 bp apart	>>DP246_oMTG783 NNNNNNNTCACACTGATATACGATTCAATTCAGGACCCGTCCATTCCCAAATCTGTAATTTTTCACATATTTTTAAAGATAATTTAGCACTTTAACCCACCTTAACCATTTTATCTCTTCCACCACCTGTGGCAATAAGCGTCCGATTGTGAGGATTCAGTGATAAAGTGGAAACGAATGAACGGTGAGCAACTTTTTGAAAAACCCATCTGAAATTTGTTTTTTTTTTTTCAATTTTTCAAATTTATTATAACTTGTATTTTAAGCGTCATTGAACATGTTTACAAAAAATCTTAATTTGCAAATAAATAAAATTTTTTTTTTTGTTTTTTTTAAAAACAATGTCCCATTAAAAAAAAAAAACAAAGGGTTAGAAATAAATA…	GGTCGCCAAGCAACTCTTCC	CCCTGCTTTGTACCCATTTGCATC
RM2431	Deletion	X:7095702	X:7095968	266 bp	Yes	65-bp insertion at junction	C36B7.5	X:7095702	X:7095968	1	>>RM2431_oMTG859 NNNNNNNNCTAATGGATCTCGTGGTAGTTCTTCTCGATTTTTGGCCGCTTGAATTTCTACTTCTTCAATNCTTCGCATGACCTGAAAAAAATTCTCACAGGTTGGTAAAAGTTGTGTTTGTTCATGTTTATTTTTGGGTTGTTCAAACTAATAAATAAAGATTCTTTTGAAAAAACTATAAAAAGCCAGTGAACACTCCGCAACAACAAAAGTGTGAATTTGCAGTAAACTTTAAAACTTTGCACATTTTTCTTTCGATAAAAGTTTGTCGTATAAAAGTAGACCGGGTACCTTATTTTAAGCCCAAAAACAGCAAAAGTTTGAGTATGAAAGGCCAACTATAATTACACAAACATCATTATAATTTTTCTTTTGCGAAATA…	GGTCTCGTTCATGCGAAGAT	CGGCTGAAAGATGCGTAGAA
GE2722	Deletion	I:4404344	I:4404470	126 bp	No		T21E12.3
GE2722	Deletion	I:7265135	I:7265240	105 bp	No		myo-1
VC528	Deletion	X:10855553	X:10881228	25675 bp	No		5 genes
VC528	Deletion	I:13584135	I:13584510	375 bp	No		ubc-14
SS746	Deletion	III:13306060	III:13306493	433 bp	No		klp-19
Homozygous Tandem Duplications
BC1217	Tandem Duplication	X:14974538	X:14993793	19,255 bp	Yes	Ratio = 2	8 genes	X:14974538	X:14993793	1	>>BC1217_TandemDup4 NNNNNNNCTGNNNAGNAATTGGGTAAAAGATGCGACATTAAAGGGAGGTTTAGAAAGTTTGCAGAAGAACGGATAGGAAATACATCTAATTAGGTATATAGTTTTGAAATAAAAGTTAGTTAACAAATTGGAATAAATTATGAAATTTGCAGCATAATAATTAAATCATAAAATATCAAAGTAAAATTTAAATGTTTTTGGTTAAATCCCCATTTATATAATGTACCTTTAAATGCAATAAAAGTGCATCAATTCAGTAAAAAGTTGTCATAAACAGGGAGTGAATCAAAATGAGGGGTATAGGCTGAAGAGAAGATGAAAACTCGAAAATGTTAGCGAAATGACAAAAAATAAAAATAAAACTAACGATGCTTTCCTT…	CGCAGCCTGGCAATAACAGAG	GCTATGTGGGACTTTAAGTAGGTGG
BC1217, SP123, VC471 and SS746	Tandem Duplication	III:5059444	III:5063035	3,591 bp	Yes	Ratio = 2	C45G9.10	III:5059444	III:5063035	1	>>BC1217_TandemDup1 NNNNNNNNNNNTGTTTTTTATTGGTAATTTTGAAAACTTTTAATAATTTTGAGAAACTTCTGGAAATAAAANTTTTTTTTAGAAACTTTGAGAAACATAGGAAAACTTTTGGAATATTATCTGCGTTCTTTCAAGCTATTACAACGTGGCAACTTACTTGCAGCAGGTTTGCTGGGAGCCTTCATTGGAGCCTTCTTCGGAGCCTTCTTCGGAGCCGATCTTTTTGTACGCTTAGCAGATTTTTTCGATCGTTTAGTCTTTCGCTTCTTTGCACAACAACCAAAGAGTCCCTTCTTACTCTTTCTCTTCTTTGAAGTCTTCGAAGATCTACGTGGCTTTGTCTTTGACTTATCCGATGTTGTTTTAGTAGGCTTTGGAG…	TAGAGGGAGATTGTAGCCGTGC	ATCTCTCTTCAGCAACCACCGTC
KR2839, VC471 and CZ1072	Tandem Duplication	I:10565986	I:10577022	11,036 bp	Yes	Ratio = 2	7 genes	I:10565986	I:10577022	1	>>KR2839_oMTG663 NNNNNNNNNNNNGATGGGATGAGTTTTTCAAGATTTCGGCCAATTTTTGTTCCGCACAAGGCTGATTTGTTTATTGGTTTGTTAGAATTCAAATTTTTATTTCAACAAAAAAATACAATTAATTTTCCAGCTTGCTCCAACGTTCTCCGATCGGAAGACAAAATGAAATATCTGAAAAAGGCGCTTGAATCGAAGATCCACACATAATTTTCATTCGAAATTCTGCCTTTCGCGCCAACACGAGAGACGCAGACACCGCGACGCGCACGCCGCGAATTGTCAGCATCTCACTGCAACCTGTTACTTCCTATTTTCAGCTTGTTTTTGTGTTTTTCTAAAACGTTTATTTTAAAAATTGATTTCAGAAATTACAGTAGTAAAA…	AATTTGCCACCACACTCAGAAGC	GGAAGAGGTGGGATAGTCGTCG
CZ1072	Tandem Duplication	III:3891209	III:3898488	7,279 bp	Yes	Ratio = 2	tir-1	III:3891219	III:3898488	10 bases apart	>>CZ1072_TandemDup_oMTG677 NNNNNNTTTNNNNNCNNNTGCANACTCNATCAAAAAGTGTGCTTTGGTAGATTTTTTAATCTGTTGAAAAAAATNNNAANNNATCGTAAATTTGCACATTAGGCTCAAAAATGAACTGGGGATTAGCTCAGGATTAACGGGACTTAAACTAGAAAAAAAGTTTGCTTTATCTGGTTAGAGACATTGGATTCTAATCTATTCAGGTCAGAAATGATTTACATTTTCTTGATTTACAATTACATTTTTTGTATCGAATTCAATTTTCGAAATATTTGAAAAAAAAGTTTAACTTTTCAGAAGTTTTTTCTTTGAAACTTCCCACAATTGGTTGGCACATTATTCTAGGGAAGATTTTTTAAAGCAATTTGAAAC…	ATTTTGTCGGCTGCAAGCCTG	GCCTGAGAAATGCACAACAGACC
KR1876	Tandem Duplication	I:11226104	I:11247445	21,341 bp	No	Ratio = 2	12 genes
Heterozygous Tandem Duplications
BC1217	Tandem Duplication	X:1509128	X:1515794	6,666 bp	Yes	Ratio = 1.5	toca-1	X:1509128	X:1515794	1	>>BC1217_TandemDup3 NNNNCNNNNTCTGCCAGGGTCCTGCGAAAGCGTATCTCTGGCCTGGCGGAGGGCCAGCTAACTCTCTCCCTCAAGCCTTCGGGAGCTTCCTGGGTTATCGATGAATTTTTGGGGATCTGCCGGGGTCCTGCGAAAGCGAATCTCCGGCAATGGCTTACTCAAAAGAACGAGCCAGCATCGAGTTGGAGTACAGTTCTAAGTTGAAGTGAGTGATTTTGCAATTTGTACATCAAAGGGTCCAAAACTACTAAATTTCCATAGAAAAACTTTAGGGAAGCTATAGTTTAGATATACTTGCTGAGAGTTTCAAATTTTGGAAAGATTTGAAAAAAAAATTGAAAAAAGGCTACAGAGAAATGCTTTACCAGCTAAATAAATT…	CGTACACCCAGAAGATGACCTCC	TCCGGTAAACTCTGCCAATATAGC
FX30237/FX30257/FX30144/FX30133/FX30235	Tandem Duplication	V:6236672	V:6239149	2,447 bp	Yes		K08B12.3, K08B12.4	V:6236672	V:6239149	1	>>FX30237_oMTG620 NNNNNNNATTCCTGANTTAATATTAGGTTGGACCGTTATATATTAGGTTGGAACAGAACCCTTCCGGGCGCGAGTCCAAATAATGCTTGAGTGCCACATTGGCACTTTTATGGGTATTGAAGATTCTCCGCTCGTGGACACGGGTCATATCTGAAAACGGTCAGTATTCAGATGGGGTGAGGTCTGGAGAATACGGTGGGTAAAGGGGAATTTTGCTGAGGGATTAAGGCTGGAAATAGAGGATAAAATAAATATTTCTAGTAGAATTTGAAGAAGCCTTACAGTAAAGTTCAAAATACGCTTCTGCGGTAAACTTTTTGCTCGACTCGAATTCGAAAATTTCCTATCAGAACAATATGAAATTTTTAAATATAATAGTAA…	CGCCAGACCGATAACAACTGC	AGATCGGATGATCGGCCACAG
MT690	Tandem Duplication	X:11845164	X:11852389	7,225 bp	Yes		4 genes	X:11845164	X:11852389	1	>>MT690_oMTG665 NNNNNNNNNNTCNTATACACNCAACGAAAAACTGGCCGAAAAGTTGAACTTTCAGACTTATGCTGGTTTTTAAAACACGTTTCATAATGAAATTCGCTTAGGTTTGTTTCATTTTCATTCATACTGAGTAATCTTAAATAAGTTATCATACTAAATTCACATGAATAGTTTTTAAGTGGTTTTCACTCGAAATAAAGAATTCAACATCGTCAAAAGTGTGTTGATTTTCTAGCCCGTACTCATACTTCTCATCACACTCGAGTTTTTCTCACAGCTTCTCTTTTTAGCTCTCTCGTGATACGTTTTCTTTGCTTTTTGCTTGTTATGCAACATTCATGTGGTTATCAGTAGAAGAAGGTGGTTCAAATACCTTATCTTTTCTT…	CGTTTTGAAGTGGTCTGGTGAGC	TGGTGCCACTAGACGTTTGAGA
SP309	Tandem Duplication	II:3495711	II:3513352	17,641 bp	Yes		11 genes	II:3495711	II:3513352	1	>>SP309_oMTG757_TandemDup NNNNNNNNNNACNTTGAGCTATCGGTCTGAAATTTTGGAGTAGACTAACTTGATGCTCAGGAATTCAAATTTTGCTATAAAATTCACAAGAGAAAAGGTTAAAGTTGAGAAAAATACGACTTACAAACTTCGAAACACAAATTGTGATTGCCTGGTACATAATAAGCCTATCCGTCTGATTTTCCACCACTGACGCTATATTCGATTTTTTCCGAAGACTTATAAAAATTGGAACATATAAAAATGCAGATAACGTAGCAATAACTTCCAAATAGTTATTGGAGGATTTAGTTTTTTTTTCTACTTTTTCCGTTTTTCTCTGAAAAAGTACCGAAAAAATGTTTTTAAAAAAAATTTGTTTTTTTTTTTCAAA…	TACGTGCCTACGTGCCTTCG	CGACGGGATGCACGTTTTGG
BC1217	Tandem Duplication	IV:14576313	IV:14582569	6,256 bp	Yes		5 genes	IV:14576313	IV:14582569	1	>>BC1217_TandemDup2 NNNNNNNNTATTTTTTTGTATTTCGNNNANAAAAACTTTCACCACGAACTTTCAAAGCCAATAGTTCTTAAACTATCGCAACTCGCGTTATTTAAGAATTTTTAATTCACTGTTTCAAGTTTTTCAAAACAGTGCTTCAATACGCGAAACCAGTCACAAGTTGCTTCGCTAAACATCAAGAATGTGAAGAGTCGGAGAAAGCAGAGTTTTACAAGGGAATGATGGCTTCAGTTGAACTTGTGGATATATTTGTACCAATTTTGGAGGCAGTTCATTCAGGAAACTTGGAGTTCATCCATACTTTTGATAAGAAGTTCAATCCAAAAGATTTGGATAATTTGAAACAGTGATTTTGATGTTTTTGGGTTTTAATAAATGA…	ACGTTTCAAGGTAATTCGCGCAG	GCGTTCGTGGTGTAATGGTCAG
RW6002	Tandem Duplication	III:11830810	III:11834895	4,085 bp	Yes		rsp-8, ntl-3	III:11830810	III:11834895	1	>>RW6002_oMTG745 NNNNANNNNNNNNANAGATTGGATGTTTTTTTTTAAGTAATCATTTGTGTTTTTCTTTGTTTTGTTATTTAATTATACCCATTCCCCTTATTATTTTATTCCTCTTATTATTCCCTTAAAAATACCTCTTCAAATGTTCGTATGATTTTTTTTTTAAAGAAAGCGGAATGCTCGTCTCGCTTTTATTTTTTAGAGTTTCGCGCGATTGCGATAAGAAACAAACAAATATTGATAAATAGATGGAAAACGAGGGTCTTAAGGGGAGAATCATGGTAATAATAAAAATAAAAATAGAAAACGGAAAATTGGGTCTCTTAAAACAGAATTAAGGATAAACAAGCATCTGTGTTGTACAGTCATGTTCGTTTTCTTTTGGAATTTC…	CCATTCTTTCTGTGTGCGGGTAC	GTCGGTGGAGAGGAGGAAGATC
DP246	Tandem Duplication	V:16914510	V:16928379	13,869 bp	Yes		8 genes	V:16914510	V:16928379	1	>>DP246_oMTG775 NNNNANNGTNGNNNNNTTGGCTGGANTTTTAATTGAGGTCCAAGACTCTATGCACCATGTTTTACGTTGTAAAATTGTGCGTAACGTCACAGTTTTTTTAGGCCTCAGTAGCACATGGTGTCAGGCTGTCTTACAACGGTTTGATCTACAAAAAGTGCGGGAAGTTTTCGACCAAAATCATTGGAGAAATCTGCGTCTAAACTTCCGCAATTCTCGTAGATCAAACCGAAATGGGACACTCTGACACCACATGCTGTAGATCACGCGAAGTTTTCTTTCCCGAATTTTTTTGATTCATCGTGCCGTGACCCTACTTCTTCGTGAAAAAAAACTAACGTTCATCCAGCACTATCTGAGCAACTTTAACCAAGGTCGATGATCGC…	CCGAATTAGAGGAGCGACCGAC	CGCGCAATTACAGCACTCTTCC
DP246	Tandem Duplication	II:12295220	II:12305725	70,505 bp	Yes	14-bp insertion at junction	17 genes	II:12295220	II:12305725	1	>>DP246_oMTG781 GNNNTNNGNNTCATTCTTCAAGATTCGAACCACGTAGTACTGGGCGTCGTCTTGCATCATTATCGGATCCTCTTGTTTCGTGAGCATACAGAATGTGGCACGTAGCTTTGCGTCGAGTTGACGAAGTTTGGACGTTACGACAGCACGGGCGGCACGGGTTACGGTGAACGAGCGGCGGTAGAATGGGACGAGTTGGGGCTGCAAAATTTTAGGGAATTTAGAAAATTGTTGTTCTTCGATTTCATGCGGATCAACGATTTCATGCGGATCACGGACGGGACATGGTGCGGAGCATTGTGCGGATCATGGTGGAACCCGGTAAGTGTCGGGCGCGGCGGAAAGCGGCTACAAAAAATAATTGCAGATTCACCCATTGAAAGGAA…	CCATGAACTCCGATCACTCCAGAC	AGTCGCTTCCAGAGTTCCAGAG
RM2431	Tandem Duplication	IV:12055597	IV:12069818	14,221 bp	Yes		8 genes	IV:12055597	IV:12069818	1	>>RM2431_oMTG847 NNNNNNNNCNTTTTGCACCAAATTCTATAATTTATTTAGTCCGGAATTCCCTTTGTTCTAGTGTGTTTAAATCTNACAATTTTCAGGTCAAAAGTCGTTTTTATCACATTTATTTAATACTTAAATATACTCGCCTTATGAATCTTGAATTAGAATTGAGCCGTAAATCTTCTGTTCAAATGTTATTCGACACTCGACGAGTTTCACTTCGTTGTGTCTATTTTTTGGTGTCACCCTTTGAAAATCGTTCATTTATTTATTTATTATACACTGTTTTATTTGAATTAAACATTTCTTAAAATGATTGCTGCTTTTCTTTTTCAAAAACAAATACACTTGTTGTACAACCAAGAGATATAATGAAAAGTTTAATTTCAGAGAA…	CCGCTTCTAGTACATCGACTTC	CAATCGAGACGGACGAGATATT
RM2431	Tandem Duplication	I:1307000	I:1308796	1,796 bp	Yes		dapk-1, K12C11.8	I:1307000	I:1308796	1	>>RM2431_oMTG843 NNNNNANAANAGATTACTTTAGCAGCTCATAACTCGGGTTGTTTTAAAGATATCAAAAAAATTTCAACTACAAAATTGTAGAAATTTAGGTAATAAACACGTTATTAGTTGATAAGTTTTTGATATATCCAAAAAAATGAGGTATAAGCTATTAAAGTGTAGAAACACGTCGATGCACCATGTTCCACTTTTCTCATTGACTTTTGGCAGCGTACACTTTGCTTTATATACGATATGCTAATAAGTGTTTCACTACAACATTTTTGAGAAATATGTGATAAACATTTTTTTAACAATCAATTTGTGCTAAATTTAAGAAGAACCGAGTTATGAGCCGCCAAAGTTGAGCAAAAATTAAAACACATTTATTGAAACATTTTCT…	GTAGATACGAGCTGCCAAACA	CCTCATCACGGGCTATACTTTAC
GE2722	Tandem Duplication	V:4405080	V:4417827	12,747 bp	Yes		6 genes	V:4405080	V:4417828	1 base apart	>>GE2722_oMTG799 NNNNNNNNNCTGANNTTTTNNGGAAATTTTTAAATTAAAATTAGTGGTCAAAATTTAAAACTTTTTCAATTTTTTTCTCGAAAAAAAATCTGCATTTTTTGAGAAAAAAGCTCAGACAAAAAATATTTTTTTTGATTTTTTTCCAGCTTTCTCCATTAATGTGAACGGTTTAATAATATTATAGCATTCTGAACATTTTATTCGCATTAAGCCGATAAATGTTGTTGAGAGAACAAAAAATGGCGACAATCCTAAATTTTCACTGCTTCTTCAGATTAAAATTGAAATTCTGAAACTATTAAAAAATGTGCAAAACCACAATTTGCCGAACTTTTTCGGGCAAATCGGCAATTTGTCGGTTTGCCGATTTGTCGGAAGTGTT…	TGCTGCATACGAGAACTGTCAAG	GATCTAGGAGTGGGCGGTAATCG
SP423	Tandem Duplication	X:3556717	X:3564732	8,015 bp	No		3 genes
DP246	Tandem Duplication	II:4161344	II:4173239	11,895 bp	No		5 genes
DP246	Tandem Duplication	IV:16407646	IV:16424465	16,819 bp	No		Y65A5A.2
DP246	Tandem Duplication	X:222755	X:232445	9,690 bp	No		4 genes
RM2431	Tandem Duplication	I:3159225	I:3171698	12,473 bp	No		4 genes
KR2839 and VC528	Tandem Duplication	I:14573853	I:14580325	6,472 bp	Yes	Overlaps hIn1	Y105E8A.25, Y105E8A.53	I:14573853	I:14580325	1	>>KR2839_oMTG753 NNNNNNNNNNTCTGCGTCTCCTCCTCCACTTCGGGTATTAATTGATTATCAATAACTGCTGATAAAGGACATCCTTCCTCAATTTCAATAGCTCCTTCCATAATTCTTGTCACCAGCTGTTCATCGTCTAGATCCACAATTAATCCATATTTATCAGCGATTGCACGGCATTCCAAGTGATAACTCGTTTCCGGAATGAATAACTCGAGGAGTTGAGATTCCGAGTGAAACCAGCTTTTCAGAGGTTTCTCTGTTTCATTGCAGGACGATTCAAAAGAGCTTAGAGTTAATGAACATTCACGTTTCGTTTCTTCATCCAGAATCCGTCGGAATTCGGATCTTCGTCAGCAAAAGGAGGAGAAGCTTAGGAGGAAGGGCAGCG…	TGCCGACAACTTCCTCTGTCC	TGTCCTCCGACACTGCTTGG
VC471	Tandem Duplication	V:17407334	V:17430906	23,572 bp	No		11 genes
KR1876 and SP423	Tandem Duplication	I:1403115	I:1404182	1067 bp	No
KR1876 and KR1233	Tandem Duplication	IV:5559708	IV:5568713	9,005 bp	No		4 genes
SP213	Tandem Duplication	X:6246453	X:6263345	16,892 bp	No		3 genes
Inverted Tandem Duplications
CZ1072	Inverted Tandem Duplication	II:15271369	II:15273155	1,786 bp	Yes		rga-9	II:15271369	II:15273155	1	>>CZ1072_InvertedTandemDup_oMTG675 NNNNNANGACNTAAATGTTAGGCCACATAATTCGGGGACTTTTGGGATTTTTGGGATTTTTTCGCGATGAAAAAAAACTTCAAATTAAATGAAATTAAATTAAACAAGAAAGAATTAAAATAAAAGGATATCACAACAAAACAAGTATATTGATATCAAAAATCACAGCTGACCGATGTCCTTAAATCAGTTGGATACGGATCCTTAGCCGCGATCGACACGCTTCTCTTCGGATGATCCGTCGTCTGGGTCAACGCGTGCTGCTTCAGACTCCCGGCACGCCCGACGCCGTTGCCACGTGGAGGCTTCGAGGTTAGCGAGCCCCACAAATTTTGTTCTCCGGAATTTTGAATTCCCGCACGTG…	AAGACACACCGAACATTTGCAC	AAGAGAGACTGTATGTGGGTAGAGG
RW6002	Inverted Tandem Duplication	III:165133	III:171152	6,019 bp	Yes	increase in coverage	F40G9.7, F40G9.18, F40G9.21, F40G9.22, F40G9.9	III:165133	III:171148	4 bp apart	>>RW6002_oMTG827 NNNNNNNNNNNAANNGTAGTTNTGTTCTCAATATGTGGTAAACAAGTTGTAAAATCTTTTGAATTAATATTTAAATGAATTTCGCTCGTGGGACGATGTATGGATCTCAGGCGTTTGTCAATGGCCAAGTGAGAAGTTTTGAATGATGAGTTGATGGACCACAGTATTAGAGACCCATCTGGTCCATTTTCTAACTCTAAGCTTTAACAATTCTGTTGTAAGGTTGAGCTTGTCAGCACAGTTGTAGAATATCGTACCTGAAATTAAAATTTTCTCAAGATCCGATTTACACNNCCAATGTNNNNNNNNGNTGATCCTTCTTATAGAATTGTCTGCGCATCGAGTTNGNCAAAGGGCNCGAAAGNCCCAGANATCTCGNGAN…	CGGCTGACTTGAATCTCCTATT	GCACATTGGGCGTGTAAATC
RM2431	Inversion or Inverted Tandem Duplication	V:18866326	V:18866821	495 bp	Yes		emb-4	V:18866326	V:18866821	1	>>RM2421_oMTG986 NNNNNNNNNNNNNNCATCNGNCGTNAGTTGNNTGNGGGGTGAGATTTCCATTGTCTTTTCTTCCNNAAAANGNNNNNTNACCCNGTTTTGCCTGTTTTTTACCGATTTTTCAACATATGGCGTAGTTTTTGGTGATTTCGTTTGATCTGGAACGAAAAACTACGCCATATGTTGAAAAATTGTCCAATTTCACACAAATTTACGCTAGTTTTCATCAAATTACTCGAATTTTCAAAACTCGGAGCAATTTTCCACAATTTGTCCAAAATTCATCGTATTTTTGGTAATTTTTAGAAAAATTTTTTGTATTCTGCTGAAAATCTGCTCAAAATATCTGAAAACTTGAAAAAATACAGTTTCTACAGAAATTCGTATCAAAAAT…	CCAATTTCCATTGAGCACACCTCTG	CAGAGGTGTGCTCAATGGAAATTGG
SP423	Inverted Tandem Duplication	V:16305	V:17193	888 bp	Yes			V:16305	V:17193	1	>SP423_oMTG1017 NNNNNNNNNNCCANNTTTNNANAGACGCAGACAAGAAAAGAACGTGGGCATAGGTTTAGACTTAGGATTATGCTTAAGCAAATTTTTAGGCAAAATGCTGAGAATGTGCGGTTCGGAGATATCACAAAGCGGTGCAGAAAGTTGTGCAGTGAGCTTCATACCTATTTCAAAGTGCAGTGAAGTACCCTAGAAAGCTTCCAACTCGCTAGATGGTCCCCCTTACCCTCATTTCTGTTTTTCGCCTCCTTCTCCCCCCCCCCCCCTTTTTTCCCTTTGGTTTTCTTNGAATTTTNNGCAANCAAAAACAAAAGGGCTTTTAAANAAACACACACACACACCCTCNTTCAAAAAAAAAATTTGGTGGNNNGGCCCTTTTCTTTATA…	TGTGTCGAGATTCCGCAAAT	AGAGGCAAGTGATCTGGTTATG
VC471	Inverted Tandem Duplication	I:1113084	I:1119780	6,696 bp	No		ZK993.5
SS746	Inverted Tandem Duplication	V:4477109	V:4477485	376 bp	No
Inversions
BC1217	Inversion	IV:4399379	IV:4401162	1,783bp	Yes	No change in read depth	ell-1, Y24D9A.6	IV:4399382	IV:4401161	3 bp apart 1 bp apart	>>BC1217_SV2 NNNNNNCNNNTGTAGATCANCNTTTTGACTACCTAATTCAAAAATTCATCGCTTCTAAATTCTTTCCACCACGGTTATTATTATTAAGACAAAAAGGGTTGGAGAAAGGAGCGAAAAGAACTAAAGATATTTAGAAACCGATCTGTCCGTCTCTCTCTCTCTCTCAAGGCGCTCGCGCGAGAAAGTTTTCCCGCCGATTTTGGAACCAGTTTTTCACTTCTTCTCTAGTGGAGAACTGAGAGAGTGCTGATGATAATGATGATGGCTCAGTCAGAGAGAGAGGAGAAAACGAAGAAAGAAAAAGATCGAGAGAGAGAGAGAGAGAGAGAGAGAGAGAGAGAGAGAGAGGGGGGGGAGAGACACCGCCCCCCCCCCCCTCTTTGTTT…	AATTTCAGGCTCTCAGTGACACG	AACAAAATCCTGGTGGCGGAG
BC1217	Inversion	IV:8065618	IV:8066587	969 bp	Yes	No change in read depth	sax-7	IV:8065618	IV:8066587	1	>>BC1217_SV3 GNNCNNNNGANCNCTTCTTCNTTCACTTTTTCCTCTTCCTTTCACCTTTCCTGACTTTATACCGATTATNAGTTGAGTGACCACTGCCACCACCACCACCAACATAGCCATTATAATCTTCTTTTGCTCTTTTCTCTTTTCAATGCTTCACCGATTCTTCTTCTTCAGCTTCTCCTTGTGCTTCGTCTCTAGGGCTAAAAAAGTAAGCTTTTTCATCATTTAAAACAAAAAAATGGAGACAATTGAAAGGTCTCGTCAAAAAATTTCAATCAAATTAAGACGACAAAACCACCACTTAACAGCAGCTAATCTGTTTTTTCTTCGTTTCTCTCATTCCCGTTCTCTCCTCTCCAAATAGGTTCACACCAGTATCATCATCTTCGTTC…	GTGTCGTAATTGAAGCCCTTGGTG	CGTTACAACAACACCTGTCCACTTC
RM2431	Inversion	II:8513281	II:10124446	1,611,165 bp	Yes	6-bp overlap	F27E5.7	II:8513281	II:10124446	1	>>RM2431_oMTG845 NNNNNNNNNNNNNTACNNNNNCATGATTGNGAGAGTTCATTGAACAATTTTCAATGTCGGGGGTTCACCGGGACCCNNNTTATACACACTGAAACGGAGAAACGGCCTGAAAAATGAGGCCCATGTACGGTTTCAGCGGTGCAGCGGGGCTCAAACTTTTCGGATTTTTCCAAAAACTTAGGGATGTTGTTAGAACAGTGTCATGTATCATTTTGTAAAGTTTGGTAGTGATAGGGCAGATGACACGTGGAAACTTCTGTTACAGGACTGTTAGAGGACAGTTGTGGGTCAACCACCAAGTGCCAATATGAAATTGCTTGAAACTGTGTTTATTCTCATTTTCATAACTATTTACGTGATATTAACTTCAAAAACTATTTTT…	TCAACTCAGAGGCTGGTAAATC	GTGTTCAGCAGGAGGGAATAG
Complex chromosomal rearrangements
FX30144	DUP-DEL	II:5131837	II:5805620	673,783 bp	Yes		lgc-56	II:5131837	II:5805620	1	>>FX30144_oMTG696_CopyGain NNNNNNNNNNNNGNACNNGNANNNNNNNANACACAACAACNGTAGCCGCATACTTTTAGAGTCTGAAAACACATATTTATTTGTATGCGAATGGCAGAAAAGGAGGGAAACAAGAATGCGAATCAAAAAAGTGATAAGCCAATCATAATTTGTGTACATGTGCTTTCAAAATGTGCCAATTTTAGACTTTTTTAGACCTTACGACCCAAAAACTTTACACCTATACTTTTCAGTCAAACATTTTACAGGTTCAAACGATTATATGGTTATTATGTACTTCAAATGTACCTACCAACATATCTCTCCGTATTCATTTCATGGATTGCTTTCTGGATTGATACCCGGGCGCTTCCTGCTCGAATCACTCTTGGT…	TCGCCGTTTGTTGTGATGGTG	AATCCAACGACAGCCAACTCAAC
FX30144	DUP-DEL	II:5136381	II:5806749	670,368 bp	Yes			II:5136381	II:5806749	1	>>FX30144_oMTG698_Deletion NNNNNNNNANNNTNNTTTTATTTGAATAGTTTTAAGCAGAGACGCGTGGCGATTGCAATTTCTTGACTGTAAGTTAGTTGTCGAAAGTTTGAATTTCCAAACATTTAGCATTTTTATAGTTCTAAAAAATTTAAAGCAAATAGTGTGATAGATGTCTAGGGCATAACTATGTTAGTTTCAAGGAATTTACGGATCATTTACAAAAAAAAAACATTTATCAACTTTCGAATTGTAAAGAAATTACAAATTTTCTGTGAAGTTTCCCGAAAATCACTAATAGAGCACCAAGAAGAGCAAAACGGGCGATAAGAGAATAAAAAATAATAGAAAAGTTACACCATGAGTGAAGTGTAGAAGAATTGATCAGAACAC…	CGCCCGTTTTCATTCAGGAAG	TCGAAACATACCTCCTCCAATGC
FX30144	DUP-DEL	II:5805620	II:5806749	1,129 bp	LOSS		K05F1.12
FX30237, FX30133	DUP-DUP	X:2932305	X:2951620	19,315 bp	Yes			X:2932305	X:2951620	1	>>FX30237_TandDup_oMTG622 NNNNNNNNNNNNTNNGCNTNCNNNANGNATTTCNNCNANATTGGCCGTAAATCAAAAAAGAAATTCAAACAATTTACTATGATACTTAATCATTATGGAACCATAGAATTGAATGTTAAAATTTTCCCCACTGGTGCTACTCCACCTTTTTTGTCTATACTTTTTTATTTTTAGAAAAATCCAAATATGTACACTTATGGGGTTATTCAAGTAATGTAGCAAAATGTATTTAAATACATTTGTGACGTCACAAATGTATTTAAATACATGTTTTTATATACGTGAATAAGGTTGTGACGTAATTTTTCTACAATTTTTAATTTTCCGACACTACTTGAATAACCCCATTAAAAACTCCCTGTTGTGTTTGCTC…	GGATTTCAAACTTGCGACAGTGC	GCGAAAGCGGATGGCGTATTATG
FX30237, FX30133	DUP-DUP	X:2939368	X:2940583	1,215 bp	Yes		Y71H10A.3, Y71H10A.4	X:2939368	X:2940583	1	>>FX30237_DupDup2_oMTG679 NNNNNGANTATGGAGTGNATGTATACTACATTAGAAAAAATACGATGTATCCTAATTAACGAAATGAAGTCAAGCTATGCCATTAAATATAATAATTTGAAAAAAAGTTAATTTCTTCGGACCGATGCAACACGAAAAAATGGACAAAATTAGAGATTTTAGCTGAAATAGGTTTTTTTTTGAATTTTTAAATTTTTAAAATTTCAAACCGACATAAAAAATTTTGAAAAAAATTTGGAAGTTTCATTACAAAATTCATTGAATTTAAAATGTCCAGAACCACTCAATGCTCCTCCTCTCTTTCTCCGTGTTACGCATATTCTCTCGCACTTTGCTTCTGGCTGCTTAGTTTTTTTCCCTTGCTGAAGGCTGA…	AAACAAACGCCAACTGAGATTT	TGCCAAGTGAGAAGTGATAGTG
GE2722	CGR TD-DEL-DEL	II:6758980	II:6763718	4,738 bp	Yes	DUP overlap/insertion at junction	F41G3.3, agr-1	II:6758980	II:6763714	4 bp apart	>>GE2722_oMTG927 NNNNNNNTATNNTTCTCCACTCATTTCTAGCTACACCAAATCCCAAGAAAAATAAAGAGACAGCACAGCAAAAGGATCGGTTGTTTGTAGACAACATGAGAGTAAGTGATCACTTTTTTTCGGGGAATAGAAAATGGAATTTGGAAAGTCATTTGGAATGCATGAAAATGGTCGAATTCGGTGGAACCTTTCTTCCATTTAGGTGCGGAAAAAACATTCATTGGGTGCCAAATTAAAGGTCACACATCGAATCAGTAGATTTGTGTCTTGTCTGCTCAAGAGAGAGNNNGAGCAAGGANNCNNTNNTTNTNNTNANNANNTTTCNTTCTTTCCNTTGATGNAANTTTTCNGCGGCTTATCATAAAATCAGTGCNACACTTTT…	GTCATGTAACTGTGCTGTCTCT	CCTTGCTCTATGCTCTCTCTTG
GE2722	CGR TD-DEL-DEL	II:6760512	II:6761141	629 bp	Yes	DEL	F41G3.3, agr-1	II:6760512	II:6761141	1	>>GE2722_oMTG929 NNNNTNNNNNTCTTATCNGCAAGGTATAAAACTTTTTTTTCTAAAAAACAAACAGACCTTATTCTTTTTGTTTTCAGATCCAACGACAAGTATCAGAATCCCAAATCTATGTACGCTTCAAAACAACACGACACGACTCGTAAAATTGGGCTCTAGGAGATGGTTTTTGAAGAAGAGAAGAACAATTTCAAAACGAGAAGAATCATTTAAGAAAAGTGTTGGCAGAAATACTGTTCGATTTTCTGAAACTGTTACAAGTATATTTTAATTGTTTTTCAACTTTGGTGCATGTTTAAAATCGCGTCATTAAAACTTTGGGGGAAATCGAAATTTCTGATTCTTCAGAAATAATTTATAAAACGCATGCAATCCTTTAAATATC…	TCATTCAGGCTTACAGCTTCC	CCTCAACGATCCTCCTTGATTT
GE2722	CGR TD-DEL-DEL	II:6761122	II:6761844	722 bp	Yes	DEL	agr-1	II:6761122	II:6761844	1	>>GE2722_oMTG931 NNNNNNTNNNTCCTACANTCCTCCAAATCTTTCAACATTTGACACTTTGGAAAATTAATTCTTAAATCTTCTCAAAAAGATTAAGAGTTCAATTCGATATCATAATCTGATTTAGAATTGTCACGTCTCTTAAATCCATTTTTAGAAATTTTTACGGCAGGGGGTTTTGACTCAAATCCTGAAACCCTCTAAATAAAACCCTGAAACAAATTTGAAAAGTTCACGTCATTATGCACCTGCATTAGTGAATGTTCATTTTGATGTCAAGCAAACTCACTGAACAAATTATAAGAAAAACTTGCAACAAGCATTTGAACAATTTTCAGAAAAGAACGAAAATGTGAGCTGTGGGTGGATTCGAAGAAGATCCTTCACGTCGTCG…	CATTCGACTTCCGCACCTTA	GGATTGGCTCCTCCAAGATATAC
DP246	CGR DUP-DEL	III:11120257	III:11121729	1,471 bp	yes	DEL 2-bp overlap	Y48A6C.12, Y48A6C.4	III:11120259	III:11121729	2bp apart 100.00%	>>DP246Het_oMTG915 NNNNNNGCGATTNATTCNTTTTTTCNGCAAACGAGTAGTATTGGCGACTCAGTTGGAGGAAAAAGTGGAAACAGATGATAATCCACTTAGTTTCCGTGGTCTAACGCTCGATGAGCTCTGCAAGCAGATGGGGCACTTTAATGCGGTAATTTTTCGCTGAATATCGATCAAAATTAATAAATTCTCGTTCAGAAAGTGAAAATGAACGCTATTCAAGGACTAAAACAGATTTTAACGTCTCGCCCGGATCTTGTCAACGTCCAGTTGAGGCTTTTGGTTCCCTGCGTGGCTGTGCACGTGGCTGACGCTTCTTTCGAGCCCTCCACACGTCATTTTAGCTTAAAAACCCAAGAATTTCTCTCTTAGCTGAAAATCCACTA…	CGACACGACTATCAAAGGTGAG	ACGTTGGAAGACAGCTGAAA
DP246	CGR DUP-DEL	III:11112143	III:11129064	16,921 bp	yes	DUP	Y48A6C.14, Y48A6C.12, Y48A6C.15, linc-76	III:11112143	III:11129064	1	>>DP246Het_oMTG913 NNNNNNNNCTGACTGTGTTTATANTAACCTTCTGGGNANATTCGGGAGCATTTCAGGAATATTCTAGGAAGCTTCTGGAAATTTGAGAAAATTCTGGATTCCTCTGAAATTTACTGGAGAATTCGAGAAAAACTTCTCTGAATCGCAGGGGAGCTCAGGCAACTCAAATCTAATATGAAAATATTAAATAGCAATATTTTTGTAATAGTGCGTCCATATAAGAATAGAAAACTCAATGTTAATGTTCAGGATTTGTTGACATGGCCGGTTTAAGATAATCACTTTTCAAAAGTCAGAATCTCTATTAGTTTTGTAGATAGAAATGTAGTTCTTGCTGGTAAATGTTGTTTTTTATCTGCTTAACATTTTTTCAGTTGAAC…	TGTTGGGCGGGAAATTACA	ACTGGGAAGTCGGAAATTACAA
GE2722	CGR DEL-DEL-DUP	II:5096210	II:5101425	5,215 bp	Yes	tandem duplication	idpb-3	II:5096210	II:5101425	1	>>GE2722_oMTG923 NNNNNACNNNNNNNNNNTNTGCTCTGGCACCCGGTGGCTCCGGCACTTCTCTTTCCAACATTTTTATTTTCTTTTTCTCAACCACACTCACAAATAAAAAAAAAACAGAAGAATATCTTCAGTTGTTTGTTGCAATTGAAAAATCAACTATTTTTCCTTCTCGTTTTCTCTACCTTTCATATTTCTCTCCAGCTCTTTTGTGCTCTCAAAAGTGTGAACAAGTTCTATTCACACTATTTATTTTCTTCATGTGCTTGTTCACATTTTATTAGAAACTACCTGATATTTGTAGTTTTGTTCACAAAAATCAATATCTCAATTTTTGACTTTTGGGAACGTCTGTCGCTGTAATTAAAAGCATAATTTTCCAGATGCTGCTGCT…	GTATGTTCCGCTTCACATGTTTC	AGGTAACGGGAGGTGGATAA
GE2722	CGR DEL-DEL-DUP	II:5099553	II:5099856	303 bp	Yes	Inversion 17-bp insertion at junction	C04G6.6	II:5099553	II:5099856	1	>>GE2722_oMTG925 NNNNNCTGNTATCTATAAGGACTAATTTTTCTACTTTTTTCAGAGACGAAATGCGAAAAGGAGAGCGGGATGATGACTCGAGCACTGTGGCGGTGATTCGTGGAGCTGGAAAGAAATCTAAGAAAACGGCGAGCAAGGGGCCAAAGAAGGAGCTCAAAAATCCGAAGAAAAAGCCAAAGAAGAATCTGAAAAACAAAAAATCGAGAAATTCCGAGTCAGAAATGTCGGATTCCGGAAAAACGACGGAAATTTTTTAGCTTTTTTAATTTAGCTTTTATAAATATGAACTAACTTTCTTAGCGCTGGCCGTCATTTTTGCATATTCTTCCTGAGCTTTTTTGTTTTTTGCCAATCGCTCCTCCTCCTGTTCTTTCATAGATTT…	TGGTATCTGACAGTTGCCTTAAT	GGCTACTCTTCACTTCACTCTTC
GE2722	CGR DEL-DEL-DUP	II:5097800	II:5099553	1,753 bp	See coverage for validation	Hom deletion	C04G6.15
FX30144	CGR	IV:16464405	IV:16465988	1,583 bp	Yes	LGIV – 8 breakpoints		IV:16464403	IV:16465989	2 bp apart 1 bp apart	>>FX30144_oMTG817 NNNNNNNTNNGANTCGATTGCCAGTGATTTACATTCTGAAACATTATATAATTATTTTTAAAAAAAACTACANCNAAAATTTGACTATGTCGTGAAACTGTATTTAATTTCAAAAGTTTAATTGAAAGTCAACAATAACAAGTTCAACAAATAGTGTATATCTTTTAAAACGTTAGTGAAACAGTAATCATAGCAGAAAACAAAAACCAATCAGAATAGTGAATATAGAAATGAGGGTAGTGGACCAANNNNCTTCACCTANNNNANNNNNNCACAATAATTATGATCAAAATTCGAGTAGTTTTTTCAAGACTGAATCACTCACTCACGCTCAAGAGAACAGTATAGCCGAGCCGATTTCTGGATAGAAGTTGGAGCACG…	GTGAGCGTCTTGCTTAGGT	TTGGTCCACTACCCTCATTTC
FX30144	CGR	IV:16464489	IV:16465367	878 bp	No	LGIV – 8 breakpoints The region seems repetitive (white reads in and out of the CGR) even in N2 IGV clearly shows a homozygous deletion					>>FX30144_oMTG817 NNNNNNNTNNGANTCGATTGCCAGTGATTTACATTCTGAAACATTATATAATTATTTTTAAAAAAAACTACANCNAAAATTTGACTATGTCGTGAAACTGTATTTAATTTCAAAAGTTTAATTGAAAGTCAACAATAACAAGTTCAACAAATAGTGTATATCTTTTAAAACGTTAGTGAAACAGTAATCATAGCAGAAAACAAAAACCAATCAGAATAGTGAATATAGAAATGAGGGTAGTGGACCAANNNNCTTCACCTANNNNANNNNNNCACAATAATTATGATCAAAATTCGAGTAGTTTTTTCAAGACTGAATCACTCACTCACGCTCAAGAGAACAGTATAGCCGAGCCGATTTCTGGATAGAAGTTGGAGCACG…	GTGAGCGTCTTGCTTAGGT	TTGGTCCACTACCCTCATTTC
FX30144	CGR	IV:16469112	IV:16510345	41,233 bp	Yes	LGIV – 8 breakpoints		IV:16469112	IV:16510345	1	>>FX30144_oMTG761_TandemDup1 NNNNNCNNNNNNNTTTACGTGGTTCCGTTTATCTGAAAAATGTCTTCTTCCCTTTTCTTCCCAAAATGGCCATGTTCTCGCCGGTATCTGGATGGAGTGTCTTGGCCTTCCACAACTTATCCACAGTCATATTCGGATCATATTTTTCATGTTTGTACTCCAGAGCAATGGTGCGAGCATTTTGTAACTTTGCAATGCTGACGAAAACGTTGAAGCTATTTGCAGTTGAAAAGAAGTAGTTGACTCTTCCTAAATTCAAAAATAAATGTTTTTTAATCCTGAAAATACTCAAACCTTGAAAAGTGTTCTGATCCCATCGTGGTCTCGAGATGTTCGGAAGTTTTGTTCATTTTGGCAAGATTTGCGTCAT…	TACCACGATGGAACGCCTGC	TTGGCTCCAACTCCCCCATG
FX30144	CGR	IV:16462855	IV:16478758	15,903 bp	Yes	LGIV – 8 breakpoints		IV:16462855	IV:16478758	1	>>FX30144_oMTG763_TandemDup2 TNNNTTCGNTNTCGTATACGANATCGTTTTTTTTCAGGAAAATTTTCATTCACTTGTACTAAATAAGGCCATACTAATTGATCTTTTTTGTTTGAATTTTTGAAATATTCAAAATTAGCTTTATTCTAGATTATAATGTTTCTAAATATTTTTTGTTTTTTTTTCAATTTCGTTAACAAGAGTTTCAGATTTAAAAAACCAAACGAGTATACAAAAATTCCATTCTAACAAATCACAGCTACTTGAAACAGCCAGTAAAAATTGGCTAAAAATGTTTTTTTAATAAAAAAAAAGTTGTTCTATTTCAATAAGTTGCAAACATACATACTTAAAATGGTTCATTAAAATTAGTGGGCAAAATTGTTTTTGT…	GTCGTTATGTTTGGGATTCCGGTG	ACGGTAATACCCAGCAGTTTCT
DP246	CGR ITD-ITD-DEL #2	II:355	II:614	259 bp	No	inverted tandem duplication
DP246	CGR ITD-ITD-DEL #2	II:871	II:914	43 bp	No	33-bp deletion
DP246	CGR ITD-ITD-DEL #2	II:38	II:1238	1,200 bp	No	inverted tandem duplication	cTel52S.1, 2L52.2
GE2722	CGR TD-DEL-DEL	V:16687220			No	Repetitive regions around
GE2722	CGR TD-DEL-DEL	V:16688819			No		srz-102
GE2722	CGR TD-DEL-DEL	V:16689584			No		srz-102
DP246	CGR ITD-ITD-DEL #1	X:1708726	X:4450957	2,742,231 bp	Yes	Very large Inversion or ITD		X:1708726	X:4450957	1	>>DP246_oMTG773 NNNNNNNNNNNGNGNGGCTGTACAGCTCTCAGAAACGTATAAACAAATTGGAAGAAAGAATGATGCTCACGTGATAAGAAGAAATTAGCATAAGCATAGAATTTCTGAATATGAAAAAAATTTATATTTAAACCACTGAATGCGGAGTTGCAACTCTTGCGTGAAGCTGCTGGTTATACCACTGGAAGAACGATTGCAAGACATTAAGGATTTCAAAAAAAAAGCATTGAAAGGACTCCCATTTTGAACAAAGGAATCCAAGACTACGGGACAAAATGAGGAAATAAACTTTGAAGCTCCTTACGTAATTTGCAAAGTTTCAGGACGAAGAGGACGAAGANNGAGTGGCCNNNNANNNTTTGTGGNTNGTATATNTTTTTTAT…	TTCTCTAACACCTCTCACGAACCAC	GCCACTCTTCTCTTCGTCCTCTTC
DP246	CGR ITD-ITD-DEL #1	X:1845387	X:4409188	2,563,803 bp	Yes	2-bp overlap Very large Inversion or ITD	T26C11.4, D1079.1	X:1845385	X:4409188	2 bp apart	>>DP246Het_oMTG909 NNNNNCNCGTCTCTTTGAAACACTATTCTCATCGTTTCCTTCTTTTCTTTCGCTCAAACCAAACATTTTTAATACTTTTTTTTTCAGAAACTTTGCCGTTTCCACACGTGTTGACATTTAATGTCTCAATCTACATCATCGAACAGGTGAGAATTTATACTAAAAATTTATATTGAAACAGAAAAAAAATCAATTCAAATAGTTGCAAAAAGTATGACGTATGACAAATGCCAACTAAAAATTTTACAAACTCTATCTTCTTTCAATATTGCTATTTTTGATAGTTGAAATAAATGTTTTGATGAAATATACACCCTCGCTATGATTGCCAGCCTTGAATTGAAAAACAACTGTCAATGAAGAAACGGAATGANTGGGAT…	CTTTCTCTCACACCCTCTCATC	CAATCCCAGTTCATTCCGTTTC
DP246	CGR ITD-ITD-DEL #1	X:1708726	X:1845387	136,661 bp	No	Deletion	T26C11.4
SP127	CGR INV-DEL-DEL	X:5646078	X:5662520	16,442 bp	Yes		srv-7	X:5646078	X:5662520		>SP127_oMTG966 NNNTNCNATGTTTTTCATTTTCNTTTNNNGTGTAATTTTCACAATAAAACATTAAGAACTTAACATAGTGTCAGGTAACGATATCACTGAGAAATTCAAATAATGGCTGCAAAATTGCCTATGAACTTTTTACAAGTAGAGTTATTTTTAGGGCTTGTTTCTCTTTGATATTTCGCTACTATGTACCATACTAATTCAAAGAAAATAAGCTTTTTCAGTCCTATTGAAAATTATATGGTTGTGTCTAGAAGGTATTCAATTCGCCTTGACAATCGAGCGCATTTTCAAATTGTAGGTAAAATCGATTAATTTATGAATGCTCAACATGTTGTATATTTTTACTTTTGTATGTATTTATTCATGCGAACTATCCAGAGCTGTGTT…	GGACGTTAGCTGAGTGAAGTAG	CGAGGACGGGAATCAATCATAA
SP127	CGR INV-DEL-DEL	X:5649867	X:5651159	1,292 bp	Yes		T22B7.3	X:5649867	X:5651159	1	>>SP127_oMTG968 NNNNNNANNNCTTTGCTTTTGATCTTTCACTTTTCTTCAAAAGCAATTTCCTCCGTATTCTTTTTTCCGATAACTTCACTTTACATGATATTTAATTATGTCGGCACTTTTTTTCAGGTTCTACCACATAGACACGGCATTCTGCCCACTCAACGAAGACGTTGCAATCTACTACCCGTATGCATTCGATCATATCACCCGTCATAATATGAGAAACGAGACAGATTTGATTGAGGTATGATAAATCAAATTTATGAAACAAACTATGGACAACTAAAGTAACTTTTCTTTTATAATTTCTTATAAATTTACATTTAAACATTGAATTAGTGTCTTTGTGAGGCAAAATAGAATAATTTTCATGAATTTTCACATAGAATGTG…	CGTCGATCCAAGGTTTGTTTATT	CGACATGCCGCACTAATTTC
SP127	CGR INV-DEL-DEL	X:5653411	X:5653703	292 bp	No		T22B7.7
GE2722	CGR DEL-DUP	I:2383607	I:2389098	5,491 bp	mismatches on second breakpoint		dot-1.1	I:2383609	?		>>GE2722_oMTG919 NNNNNNNNTNNNNTTCNNAAAAAAAAAAAAGCAAAANNACANTTTNGCCNCTTTTCCGGNAAATTCGGCATTTTNNNAATTTGCCGGAAATTTTCAATTCCGGNAATTTGCCGATTTGCCAAAAAGGAAAATTTGCCGGCCACAAAAAAATCAATCGCTTCCCAAAAAATTCAAAAATTNNGGTTACNGTAGCTTTTTTTTTTCCCTACGAGACCCNTNTGGCCAAAAAGGNNAAATTCCGGNTTTTTGCCAATTTGCCTGAATTTTTTTTTTTGGGAAAATNGCCGATGGGCCGGAAATTTTGATTTTCGGAAAATTGCCGGTTTGCCGATTTGCCAATTTGCCGGAAATTTTTTTTTTCGGNAAGTTGCCGGTTTGCCGG…	TGCTGGAAATTCGCGTACAA	CGTCGCAAGAAGCTCATCAA
GE2722	CGR DEL-DUP	I:2384048	I:2389086	5,038 bp	yes		dot-1.1	I:2384049	I:2389112	1 bp apart 26 bp apart	>>GE2722_oMTG921 ATNNNTTTCGGNAATTTGCCGGTTTGTCGGAATTTTGATTTTCAATAAATATCCGACTTTCCGGAAATGTTGATTTTCGGCAAATTTCCAATTTGCTGGAAACTTTTATTTTCGGCGAATTGCCGATTTGCCAATTTGTCGGAAATTTTCAATTCCGATAATTTGCCCCTTTGCCGGAAATTTTCATTTTTGGCAAGTTGTCGTTGTTGAAATTTCCGGCAAATCGGCAATTTTCCCGCAAATCGACAAATTGCCGAAATTGAAAATTCCGGCAAATTGGCAAATTGATAACGTTTTAAAAATTTTCGGAAAATCGGCAAATTGTGGTTTTGCACTTTTTTTGCTGGAAATTCGCGTACAATTTTGCCGAAAAAAAAAATTG…	CGGAAATTTACCGGCCTACT	GATGGGTCTCGTAGCGAAATAA
SP453	CGR	X:5637751	X:5642424	4,673 bp	Yes		T22B7.8	X:5637751	X:5642424	1	>SP423_oMTG1019 NNNNNNNNNNGCANNNATCNANNNGNTTGATTCACAGTTTTTAAAATTTTTATTCACCAATAATTTTGATCGTCATAATTTTCATCGTACAGTCCGTCGTCTCCAATACCAAAATCACCAAAAGCATCAACAATGTCGTCAAAATTTTCAGGATGAAAATCATCATAATCTTGATCATTGTCCGGTTCAAATGAGCCCTCACTATTATTGTCGTAATCCTCAAATTGGAGTTGCTGAGCCATTAACAGATCCTGTATGTTTTCATTTATCAGTTGATTGTTATAATGTGCATGGTCTTCATTTAAATTTCTGACTGCGTTTTCTCTTTGCCCGGGTTCTGAAATATATTTGATTAAAAAGTAAAGGAAAACATATTAACTAAC…	CTTGCACTGTTTGTTTGGTTTG	CGTCGAGGGTACTTGTGTATT
SP453	CGR	X:5638858	X:5642068	3,210 bp	Yes		T22B7.4	X:5638858	X:5642068	1	>SP243_oMTG1021 NNNANTNGTNAAACATAGAAACAAAGATGATAAACGTGTTGATGATGTAGAAGATTCGAATGATTTGGAAGAAAACGCATCGTCTGCACCAATGCGTAGCACTAGTGAGTGTGGGGATGAAAGAGAAAGGAGAAACAGCTCTAGTGACTCCAGTGATTGTGTTTGAATTGCCAAGCTACTGTAGACCCATTAT	TGGAAGAGGAGCAGGATGA	AATAATGGGTCTACAGTAGCTTGG
SP453	CGR	X:5642328	X:5652469	10,141 bp	Yes		T22B7.7	X:5642328	X:5652469	1	>SP243_oMTG1025 NNNNGNNNNTNTGGTGTGGATTACTTGTGGCAATTGATTTCTTCTTTGGCTTCAAATGTGAACAGAAAACNATNACNAATTTCGAATTTATTCGTGTTCGAATTGTAAACTTCCACTTGAGAGTTAACCTGAAAACAGACCTTTTAGAACGTTTTAATTTTGCAGCCTGTTTTACCTGGAATTTCTGTTCCTTGTTATCAACGTTGCAGACAAAAGCGCTGAACTTTAAAATACTTCCAATTTCCACGACTTTCATAAACTCTGCGTCATCAATTGAAGATACTCGAACGGAAGTTTTGGAGAACATCTTTGCGCAAAGTTCAGCAGTTTCAAGACCCTTCCTAACCAAAAAACCACCAAAAACTGATCCGTATGGGTTTTCG…	GTGTTCTTCGCTTTCCATTGAG	TCGAAATGTAGTTGGACTTGATAGA
SP453	CGR	X:5642752	X:5643006	254 bp	No		srv-7
VC1771	CGR	II:11113451	II:11113761	310 bp	Yes	Overlaps mIn1	apc-1	II:11113451	II:11113761	1	>>VC1771_HetRedesign NNNNNNTGNNNANNTCGGAGCATCCGTTCATTGCCTCCAAACATTGCCGTCGTGAAATCCGAACCAAGAACTACAGTAATCCCACTCTTCATAACAAATGCCGCATCCACACAGTCTACAACACACGGCTCGTGTTTTCCCTTCTCCAATAAATGCATCGTTGCTTCGGGACTTTACCAGAATGATACGCGATACGCCAAGGAACTTCTCGAAGAATACACAGCATGGAAATGATCGTGATTTTGGAGATCTTGAACGAGATCCTGATGTTGATCTACTCTTGTCGAAAGTGTGTCTGGAATGTGTTTATGTGGAACCGAAGGAAGGAGCATNNCCGAAAGNNCNNAGGATANNGGANAGGTGAANNGCCAAGATGTT…	CCGTGATAACTCTGCTACTCCTCC	GCTTTCGGTATTGCTCCTTCCTTC
VC1771	CGR	II:11097010	II:11126950	29,940 bp	No		rpl-36.A, lsm-1
VC1771	CGR	II:11163723	II:11164035	312 bp	No
VC471	CGR #1	IV:14634872	IV:14635999	1,127 bp	No		ule-2
VC471	CGR #1	IV:14635661	IV:14638779	3,118 bp	No		ule-2, Y57G11C.39
VC471	CGR #2	V:2658411	V:2662780	4,369 bp	No		angl-1
VC471	CGR #2	V:2661663	V:2661982	319 bp	No		angl-1
VC471	CGR #2	V:2653743	V:2661665	7,922 bp	No		angl-1
SS746	CGR	III:13069431	III:13173873	104,442 bp	No
SS746	CGR	III:13173597	III:13173875	278 bp	No
SS746	CGR	III:13069519	III:13173050	103,531 bp	No		Y39E4B.5
SS746	CGR	III:13068553	III:13069427	874 bp	No
SS746	CGR	III:13068865	III:13069432	567 bp	No
CB3475	CGR #1	IV:15906388	IV:15911443	5,055 bp	No
CB3475	CGR #1	IV:15908017	IV:15908481	464 bp	No		srv-15
CB3475	CGR #2	V:492796	V:493710	914 bp	No		str-196
CB3475	CGR #2	V:498904	V:499418	514 bp	No		T01G6.1
CB3475	CGR #2	V:486968	V:506703	19,735 bp	No
CB4281	CGR #1	V:2144217	V:2156311	12,094 bp	Yes	Part of eT1 haplotype (Maroilley et al., 2021)	F22F7.12, srbc-21	V:2144217	V:2156311
CB4281	CGR #1	V:2148055	V:2148629	574 bp	Yes	Part of eT1 haplotype (Maroilley et al., 2021)	srbc-20, C45H4.21	V:2148055	V:2148629
KR1233	breakpoint	X:4778973			No		hum-10

## Sheet: Supplemental_Table_S6
Regions balanced by each balancer
Balancer	Region balanced	Previous description	N	Genes
nT1	IV:1901208-17500000	right portion Chr IV from right end through unc-17 (IV:3618259..3624699)	4665	4R79.2;aagr-1;aat-1;aat-4;aat-8;abt-1;abt-3;abu-5;AC7.3;acc-1;acc-2;acdh-13;acl-13;acl-3;acox-3;acp-6;acp-7;acr-24;acr-25;acs-18;acs-20;acs-23;adah-1;adk-1;afmd-1;afmd-2;agt-1;alg-3;algn-14;alh-3;allo-1;alp-1;aly-1;aly-2;aly-3;ama-1;amph-1;amt-2;anat-1;anoh-2;anr-11;anr-13;anr-18;anr-3;anr-4;anr-44;anr-47;anr-55;anr-56;anr-57;anr-8;ant-1.3;ant-1.4;aptf-2;aqp-3;ard-1;arf-5;arf-6;ari-1.4;ari-2;ark-…
nT1	V:1-16832779	left protion of Chr V from left end through unc-76 (V:15071760..15080152)	6336	aagr-3;aat-2;aat-6;abcf-1;abf-3;abhd-12;abhd-5.1;abhd-5.2;abt-4;abu-1;abu-15;abu-4;abu-6;abu-7;abu-8;AC3.11;AC3.12;AC3.13;AC3.14;AC3.15;AC3.16;AC3.17;AC3.5;AC3.9;acd-4;acds-10;acl-14;acl-2;acl-6;acl-8;acl-9;acly-2;acr-15;acr-16;acr-17;acr-18;acr-23;acs-1;acs-10;acs-14;acs-2;acs-21;acs-3;act-1;act-2;act-3;acy-2;acy-4;add-2;adh-1;adh-5;adss-1;AH10.10;AH10.11;AH10.2;AH10.4;AH10.7;AH10.8;AH10.9;ahsa-…
hT2	I:1-13187133	left portion of Chr I from left end through unc-101 (I:12508299-12513420)	3777	aap-1;aars-2;aat-5;aat-9;aatf-1;abf-1;abf-2;abhd-11.1;abhd-11.2;abt-2;abt-5;abt-6;abtm-1;abts-1;acbp-1;acd-1;acd-2;acd-5;acdh-1;acdh-3;acdh-4;acdh-5;ace-2;acin-1;acl-11;acox-1.1;acox-1.2;acox-1.3;acox-1.4;acr-11;acr-19;acr-6;acs-13;acs-16;adpr-1;adr-1;adsl-1;aex-1;afd-1;aha-1;ahcy-1;aho-3;ahr-1;ain-2;air-2;akir-1;alg-5;algn-10;aman-3;amx-2;anc-1;anr-10;anr-14;anr-19;anr-20;anr-25;anr-38;anr-40;an…
hT2	III:4822648-13700000	right protion of Chr III from right end through dpy-17 (III:5107330..5108492)	2571	aak-1;aakb-2;aakg-1;abce-1;abcf-2;abcf-3;abi-1;abu-13;acaa-2;acbp-4;acbp-7;acc-4;acdh-11;acdh-6;aco-2;acox-1.5;acr-21;acr-5;acs-4;adr-2;agmo-1;akap-1;aldo-2;alg-4;algn-1;algn-11;alh-1;alh-12;alh-9;alx-1;amdh-1;ani-1;anmt-1;anmt-2;anoh-1;anr-1;anr-34;ant-1.1;apc-2;arf-1;arl-5;arle-14;arrd-15;arrd-16;arx-3;arx-5;arx-6;asna-1;atg-13;atgl-1;athp-1;atp-2;attf-4;atx-2;B0244.10;B0244.13;B0244.14;B0244.1…
mnC1	II:4904692-14909258	right portion of Chr II from around dpy-10 (II:6710149-6712227) to around unc-52 (II:14647321-14684456)	3403	aagr-2;aakg-5;aars-1;abch-1;abcx-1;abts-3;abu-14;acbp-6;acdh-12;acdh-2;acdh-8;ace-3;ace-4;acer-1;acl-7;acp-2;acp-3;acp-4;acr-14;acr-20;acr-7;acs-6;acs-7;ada-2;adal-1;adbp-1;ador-1;aff-1;age-1;agl-1;agr-1;agt-2;agxt-1;AH6.17;AH6.3;aipr-1;aka-1;alfa-1;algn-2;algn-3;algn-6;algn-8;algn-9;alh-7;alh-8;alkb-7;ampd-1;amt-3;ani-2;anr-12;anr-2;anr-22;anr-35;anr-51;anr-52;anr-54;apc-1;apn-1;appg-1;appg-2;ap…
mIn1	II:3553628-12704681	center portion of Chr II from lin-31 (II:3982549..3987029) through rol-1 (II:12172573..12176069)	3261	aagr-2;aakg-5;aars-1;abch-1;abcx-1;abts-3;abu-14;acbp-6;acdh-12;acdh-2;acdh-8;acer-1;acp-2;acp-3;acp-4;acr-14;acr-7;acs-11;acs-6;acs-7;ada-2;adal-1;adbp-1;ador-1;aff-1;age-1;agr-1;agt-2;agxt-1;AH6.17;AH6.3;aipr-1;aka-1;alfa-1;algn-2;algn-6;algn-8;algn-9;alh-8;ampd-1;amt-3;ani-2;anr-2;anr-22;anr-35;anr-41;anr-51;anr-52;anr-54;apc-1;apn-1;appg-1;appg-2;aptf-1;aptf-3;aptf-4;aqp-1;aqp-10;aqp-12;aqp-2…
eT1	III:8200764-13700000	right portion of Chr III from right end to unc-36 (III:8193843-8201217)	1506	aak-1;aakb-2;aakg-1;abce-1;abcf-2;acaa-2;acc-4;acdh-11;acdh-6;acox-1.5;agmo-1;alg-4;alx-1;ani-1;anmt-1;anoh-1;anr-34;ant-1.1;arl-5;arrd-15;arrd-16;arx-3;arx-5;asna-1;athp-1;atx-2;B0303.11;B0303.14;B0303.16;B0303.17;B0303.18;B0303.3;B0303.4;B0303.7;B0464.6;B0464.9;B0523.6;baf-1;bbs-4;bbs-5;bckd-1A;BE10.1;BE10.3;BE10.4;BE10.5;BE10.6;BE10.7;bed-2;best-18;best-5;bli-5;blos-1;bre-2;bre-3;brp-1;bud-13;…
eT1	V:1-8930675	left portion of Chr V from left end through unc-23 (V:8936359..8939684)	2954	abhd-12;abhd-5.1;abhd-5.2;abt-4;abu-15;abu-4;abu-6;abu-7;abu-8;acd-4;acds-10;acl-6;acl-8;acl-9;acr-15;acr-16;acr-17;acr-23;acs-1;acs-21;acs-3;acy-2;acy-4;adh-5;adss-1;air-1;algn-12;algn-5;alh-2;alh-4;alh-5;angl-1;anr-21;anr-23;anr-32;anr-36;anr-58;anr-6;aps-1;apx-1;arid-1;arrd-18;arrd-19;arrd-20;arrd-21;arrd-22;asns-1;asp-11;asp-12;asp-13;asp-5;asp-6;asp-7;asp-8;atf-8;atg-18;atg-9;atp-4;attf-2;B0…
mT1	II:6296872-15000000	right portion of Chr II from the right end through dpy-10 (II:6710149-6712227)	2830	aakg-5;aars-1;abch-1;abcx-1;abu-14;acbp-6;acdh-12;ace-3;ace-4;acer-1;acl-7;acp-2;acp-3;acp-4;acr-14;acr-20;acr-7;acs-6;acs-7;ada-2;adal-1;adbp-1;ador-1;aff-1;age-1;agl-1;agr-1;agxt-1;AH6.17;AH6.3;aipr-1;aka-1;alfa-1;algn-3;algn-6;algn-8;algn-9;alh-7;alh-8;alkb-7;amt-3;ani-2;anr-12;anr-2;anr-35;anr-51;anr-52;apc-1;apn-1;appg-1;appg-2;aptf-1;aptf-3;aptf-4;aqp-1;aqp-10;aqp-12;aqp-2;arc-1;arl-1;arl-3…
mT1	III:3635354-13700000	right portion of Chr III from the right end to between daf-2 (III:2994514..3040846) and unc-93 (III:3644375..3648822)	2948	aak-1;aakb-2;aakg-1;abce-1;abcf-2;abcf-3;abi-1;abu-13;acaa-2;acbp-4;acbp-7;acc-4;acdh-11;acdh-6;aco-2;acox-1.5;acr-21;acr-5;acs-19;acs-4;acy-1;acy-3;adr-2;agmo-1;akap-1;aldo-2;alg-4;algn-1;algn-11;alh-1;alh-12;alh-9;alkb-8;alx-1;amdh-1;amx-1;ani-1;anmt-1;anmt-2;anoh-1;anr-1;anr-34;anr-9;ant-1.1;apc-11;apc-2;arcp-1;arf-1;arl-5;arl-6;arle-14;arrd-15;arrd-16;arx-3;arx-5;arx-6;asb-1;asd-1;asna-1;atf-…
qC1	III:1286122-13737952	left portion of Chr III from tra-1 (III:11170890..11195201) to at least dpy-1 (III:2034988..2048007)	3596	aak-1;aakb-2;aakg-1;abce-1;abcf-2;abcf-3;abi-1;abu-13;acaa-2;acbp-4;acbp-5;acbp-7;acc-4;acdh-11;acdh-6;aco-2;acox-1.5;acr-21;acr-5;acs-19;acs-4;acs-5;act-5;acy-1;acy-3;adr-2;agmo-1;akap-1;aldo-1;aldo-2;alg-4;algn-1;algn-11;alh-1;alh-12;alh-9;alkb-8;alx-1;amdh-1;amx-1;ani-1;anmt-1;anmt-2;anoh-1;anr-1;anr-26;anr-28;anr-34;anr-53;anr-9;ant-1.1;apb-1;apc-11;apc-2;aqp-11;arcp-1;arf-1;arl-5;arl-6;arle-…
szT1	I:1-7631470	left portion of Chr I through unc-13 (I:7422785..7454116)
szT1	X:1-2597439	nearly all Chr X from right end to around dpy-3 (X:2144605..2145647)
mnDp1	X:13794000-17600000	Chr X to Chr V, with a severe reduction of recombination frequency from unc-60 (V:1475086-1479576) to dpy-11 (V:6511583-6515240)
mnDp1
hIn1	I:11249952-15003739	right portion of Chr I from unc-75 (I:11592246..11601712) through unc-54 (I:14855901..14863482).	1132	aat-9;abhd-11.1;abhd-11.2;abt-5;acox-1.1;acox-1.2;acox-1.3;acox-1.4;aex-5;aex-6;agef-1;amx-2;anr-14;apg-1;asah-1;atg-4.1;atp-1;attf-6;B0019.2;B0019.5;B0019.6;bah-1;bath-34;bath-35;bath-40;bbs-1;best-10;best-11;best-25;best-26;best-8;bgnt-1.6;bgnt-1.7;bgnt-1.8;blos-9;C01A2.1;C01A2.10;C01A2.2;C01A2.4;C01A2.6;C01A2.8;C01A2.9;C15C6.1;C15C6.2;C15C6.3;C15C6.5;C15C6.6;C15C6.t1;C17D12.10;C17D12.11;C17D12…
sC1	III:323321-4641137	portion of Chr III from around unc-45 (III:491547..502625) to near daf-2 (III:2994514..3040846)	1147	acs-19;acsd-1;acy-3;affl-1;affl-2;alh-11;alkb-8;amx-1;anr-26;anr-28;anr-53;anr-9;apb-1;apc-11;arcp-1;arx-4;asb-1;asd-1;atf-7;ave-1;B0284.3;B0284.5;B0284.7;B0285.11;B0285.14;B0285.15;B0285.16;B0285.17;B0285.3;B0285.6;B0285.t1;B0353.1;B0353.2;B0412.10;B0412.11;B0412.6;B0412.7;B0412.9;B0524.10;B0524.2;B0524.3;B0524.4;B0524.5;B0524.6;B0524.7;B0524.8;B0524.9;BE0003N10.1;BE0003N10.3;BE0003N10.4;BE0003N…
hT1	I:1-8409987	left portion of Chr I from the left end through let-80 ()	2148	aap-1;aars-2;aat-5;aatf-1;abf-1;abf-2;abt-2;abt-6;abtm-1;abts-1;acbp-1;acd-1;acd-2;acd-5;acdh-1;acdh-3;acdh-4;acdh-5;ace-2;acin-1;acl-11;acr-11;acr-6;acs-13;acs-16;adpr-1;adr-1;adsl-1;aex-1;afd-1;ahcy-1;aho-3;ain-2;air-2;akir-1;aman-3;anc-1;anr-10;anr-19;anr-38;anr-42;anr-45;anr-5;ant-1.2;apb-3;apm-1;app-1;apr-1;aps-3;ari-1.1;ari-1.2;ari-1.3;arl-13;arx-1;arx-7;asd-2;asic-1;asic-2;atg-5;ath-1;atm-…
hT1	V:1-7207631	left portion of Chr V from the left end through dpy-11 (V:6511583..6515240).	2306	abhd-5.1;abhd-5.2;abt-4;abu-15;abu-4;abu-6;abu-7;abu-8;acds-10;acl-6;acl-8;acl-9;acr-17;acr-23;acs-1;acs-21;acs-3;acy-2;acy-4;adh-5;adss-1;algn-5;alh-2;alh-4;alh-5;angl-1;anr-21;anr-23;anr-32;anr-58;anr-6;aps-1;apx-1;arid-1;arrd-18;arrd-19;arrd-20;arrd-21;arrd-22;asp-7;asp-8;atf-8;atg-9;atp-4;attf-2;B0213.18;B0213.21;B0213.22;B0213.23;B0213.24;B0213.25;B0238.11;B0238.12;B0238.13;B0238.15;B0238.18…
stDp2	X:6842000-10309000	small region of the center of Chr X from around unc-58 (X:10104610..10133182) to around unc-6 (X:6889674..6897147).	1244	abu-9;acl-12;acs-22;adm-4;adt-2;aex-2;aexr-3;ajm-1;alh-10;apa-2;apy-1;arrd-28;asg-2;asns-2;B0272.3;B0272.4;B0403.10;B0403.11;B0403.12;B0403.13;B0403.14;B0403.3;B0403.5;B0403.6;B0403.7;B0403.8;B0403.9;B0416.10;B0416.11;B0416.2;B0416.3;B0416.4;B0416.5;B0416.7;B0416.8;B0416.9;B0563.1;B0563.10;B0563.12;B0563.13;B0563.14;B0563.15;B0563.16;B0563.17;B0563.18;B0563.5;B0563.6;B0563.7;B0563.8;B0563.9;bar-1…
mnDp33	IV:2853000-4028000	small region of left portion of Chr X from lin-18 (X:3958552..3961907) to osm-5 (X:2984263..2991478).	322	aat-8;algn-14;anr-18;anr-47;B0212.3;B0212.7;B0212.8;B0212.9;B0212.t1;B0546.3;B0546.4;B0546.5;best-20;blos-7;bris-1;C04C3.10;C04C3.11;C04C3.12;C04C3.13;C04C3.14;C04C3.4;C04C3.6;C04C3.7;C04C3.9;C09G12.17;C09G12.18;C09G12.19;C09G12.5;C09G12.t1;cal-3;CC8.2;CC8.3;ced-10;ceh-53;cha-1;clec-173;clec-174;clec-67;clec-68;clec-69;clec-70;clec-71;clec-72;clec-73;clec-74;clec-75;clec-76;clec-77;clec-78;clec-7…
hDf8	I:1-11034814	from around dpy-14 (I:6843589..6845142) to around the left end of the Chr I	3064	aap-1;aars-2;aat-5;aatf-1;abf-1;abf-2;abt-2;abt-6;abtm-1;abts-1;acbp-1;acd-1;acd-2;acd-5;acdh-1;acdh-3;acdh-4;acdh-5;ace-2;acin-1;acl-11;acr-11;acr-19;acr-6;acs-13;acs-16;adpr-1;adr-1;adsl-1;aex-1;afd-1;aha-1;ahcy-1;aho-3;ahr-1;ain-2;air-2;akir-1;alg-5;algn-10;aman-3;anc-1;anr-10;anr-19;anr-20;anr-25;anr-38;anr-42;anr-45;anr-46;anr-5;ant-1.2;apb-3;aph-1;aph-2;apm-1;app-1;apr-1;aps-3;aqp-9;arch-1;…
mnDp3	X:12803000-17600000	right portion of Chr X from around the right end through unc-9 (X:13201770..13216729).	1524	aak-2;aakb-1;aakg-2;abu-3;acd-3;acdh-10;acdh-7;ace-1;acl-1;acox-1.6;acr-12;acr-9;acs-9;adm-2;ain-1;akt-2;alg-1;arl-7;arrd-24;arrd-25;arrd-27;asp-4;atf-4;atrn-1;B0302.2;B0302.4;B0302.5;B0302.7;B0395.10;B0395.3;B0395.7;B0395.8;B0395.9;B0395.t1;bcat-1;bgnt-1.5;blos-8;bra-1;bus-17;C02C6.10;C02C6.11;C02C6.12;C02C6.13;C02C6.14;C02C6.15;C02C6.16;C02C6.4;C02C6.5;C02C6.6;C02C6.7;C02C6.8;C02C6.9;C02D4.10;C…
sC4	V:16000000-22000000	right portion of Chr V from rol-9 to unc-76 (V:15071760..15080152).
eDf43	V:3466642-3714670	deficiency that spans acr-23 (V:3651656..3659572) and neighbouring genes	82	acr-23;C07G3.10;C07G3.13;C07G3.15;C07G3.8;F40C5.1;F40C5.2;F59B1.10;F59B1.2;F59B1.4;F59B1.6;F59B1.8;grl-27;grl-28;grl-29;grl-30;grl-31;grl-32;gst-33;irg-1;lin-40;lys-7;nhr-221;nhr-222;nhr-93;oac-2;pals-33;pygl-1;rpl-11.1;srbc-29;srbc-30;srbc-31;srbc-32;srbc-33;srbc-35;srbc-36;srbc-66;srbc-67;srbc-68;srbc-69;srh-191;srh-212;srh-213;sri-21;srw-130;srx-41;srx-93;srx-94;str-113;str-114;str-225;str-226…
e917	V:4488422-14577013	center of Chr V	4012	aagr-3;aat-2;aat-6;abcf-1;abhd-12;abhd-5.1;abhd-5.2;abu-1;abu-15;abu-6;abu-7;abu-8;AC3.11;AC3.12;AC3.13;AC3.14;AC3.15;AC3.16;AC3.17;AC3.5;AC3.9;acd-4;acds-10;acl-14;acl-2;acl-6;acl-8;acl-9;acly-2;acr-15;acr-16;acs-1;acs-10;acs-14;act-1;act-2;act-3;acy-2;acy-4;add-2;adh-1;adss-1;AH10.10;AH10.11;AH10.2;AH10.4;AH10.7;AH10.8;AH10.9;aip-1;air-1;akt-1;algn-12;algn-13;alh-4;aman-2;anmt-3;anp-1;anr-15;an…
nDf6	III:3607207-3695411	deficiency	21	anr-9;C32A3.5;C32A3.6;C32A3.7;C46F11.4;C46F11.5;C46F11.6;C46F11.7;C46F11.8;gsr-1;linc-147;linc-82;linc-95;madf-8;mrps-31;npr-15;ptp-1;rilp-1;sel-8;T27D1.4;unc-93;
hDf15	I:12431742-14006044	deficiency (I 13.30..13.910)	458	acox-1.1;acox-1.2;acox-1.3;acox-1.4;aex-6;agef-1;amx-2;anr-14;asah-1;atg-4.1;atp-1;attf-6;B0019.2;B0019.5;B0019.6;bath-34;bath-35;bgnt-1.8;C01A2.1;C01A2.10;C01A2.2;C01A2.4;C01A2.6;C01A2.8;C01A2.9;C17H1.1;C17H1.12;C17H1.2;C47B2.10;C47B2.11;C47B2.12;C47B2.2;C47B2.9;C49G9.2;C54C8.12;C54C8.3;C54C8.4;C54C8.8;car-1;casc-3;CC4.4;ccct-1;ciao-1;clec-102;clec-103;clec-104;clec-105;clec-106;clec-107;clec-10…
sDf22	IV:2853000-4028000	deficiency from let-99 (IV:12567720..12570623) to unc-31 (IV:12773862..12788344)
hT3		left portion of Chr I from left end to around let-363 (I:5245743..5263424)
hT3		right portion of Chr X from the right end to between dpy-7 (X:7536467..7537792) and unc-3 (X:14773538..14783568).

## Sheet: Supplemental_Table_S7
RUFUS calling for CB3475
#CHROM	POS	ID	REF	ALT	QUAL	FILTER	INFO	FORMAT	./CB3475_trim_bwaMEM_sort_modif.bam	N2_SV_trim_bwaMEM_sort_modif.bam	Havaiian_SV_trim_bwaMEM_sort_modif.bam	Visual Inspection	% REF-ALT
I	211435	X-DeNovo	G	A	100	PASS	PH=none;FEX=PASS;FS=25/25;RN=NODE_CB3475_trim_bwaMEM_sort_modif.bam.generator.V2_5_L362_D12:2:3::MH0;MQ=15;cigar=362M;SB=0.4;AS=2-1;CVT=X;HD=14_14_14_14_13_13_13_13_13_14_14_14_14_14_14_15_15_14_14_14_14_14_15_15_15_;AO=13;VT=X	GT:DP:RO:AO	0/1:43:30:13	0/0:28:28:0	0/0:84:84:0	HET	29-71%
I	347928	X-DeNovo	G	A	100	PASS	PH=PHASED-50-N2_SV_trim_bwaMEM_sort_modif.bam;FEX=PASS;FS=25/25;RN=NODE_CB3475_trim_bwaMEM_sort_modif.bam.generator.V2_13_L556_D21:7:4::MH0;MQ=60;cigar=556M;SB=0.636364;AS=2-1;CVT=X;HD=26_26_26_24_24_24_24_24_24_24_24_23_24_23_22_24_24_23_23_24_23_22_22_22_22_;AO=22;VT=X	GT:DP:RO:AO	0/1:35:13:22	0/0:8:8:0	0/0:28:28:0	HET	35-65%
I	363630	X-DeNovo	G	A	100	PASS	PH=none;FEX=PASS;FS=25/25;RN=NODE_CB3475_trim_bwaMEM_sort_modif.bam.generator.V2_16_L520_D13:5:4::MH0;MQ=60;cigar=520M;SB=0.555556;AS=2-1;CVT=X;HD=13_13_13_13_13_13_13_13_13_13_12_12_12_12_12_11_11_11_11_13_13_13_13_14_14_;AO=11;VT=X	GT:DP:RO:AO	1/1:11:0:11	.:0:0:0	0/0:19:19:0	HET	6-94%
I	845076	X-DeNovo	G	A	100	PASS	PH=PHASED-16-N2_SV_trim_bwaMEM_sort_modif.bam;FEX=PASS;FS=25/25;RN=NODE_CB3475_trim_bwaMEM_sort_modif.bam.generator.V2_54_L330_D6:1:2::MH0;MQ=60;cigar=104S226M;SB=0.333333;AS=2-2;CVT=X;HD=19_19_19_19_18_16_16_15_15_15_15_15_15_14_14_14_14_14_14_14_13_13_13_14_14_;AO=13;VT=X	GT:DP:RO:AO	0/1:18:5:13	0/0:9:9:0	0/0:19:19:0	HET	19-81%
I	865165	X-DeNovo	C	G	100	PASS	PH=none;FEX=PASS;FS=25/25;RN=NODE_CB3475_trim_bwaMEM_sort_modif.bam.generator.V2_64_L654_D12:4:4::MH0;MQ=60;cigar=654M;SB=0.5;AS=2-1;CVT=X;HD=16_15_14_14_14_14_14_14_14_14_14_14_14_14_14_15_15_15_15_15_14_14_14_14_14_;AO=14;VT=X	GT:DP:RO:AO	0/1:23:9:14	0/0:9:9:0	0/0:33:33:0	HET	44-56%
I	898349	X-DeNovo	G	A	100	PASS	PH=PHASED-16-N2_SV_trim_bwaMEM_sort_modif.bam;FEX=PASS;FS=25/25;RN=NODE_CB3475_trim_bwaMEM_sort_modif.bam.generator.V2_70_L430_D19:5:4::MH0;MQ=60;cigar=430M;SB=0.555556;AS=2-1;CVT=X;HD=24_24_24_24_24_23_23_23_24_25_27_27_27_27_27_28_28_28_28_28_29_29_29_29_29_;AO=23;VT=X	GT:DP:RO:AO	1/1:26:3:23	0/0:13:13:0	0/0:22:22:0	HET	14-86%
I	1195966	X-DeNovo	G	A	100	PASS	PH=none;FEX=PASS;FS=25/25;RN=NODE_CB3475_trim_bwaMEM_sort_modif.bam.generator.V2_103_L414_D17:1:7::MH0;MQ=60;cigar=414M;SB=0.125;AS=2-1;CVT=X;HD=19_19_20_20_20_20_20_21_21_21_21_21_21_21_21_21_21_19_20_19_18_19_19_18_18_;AO=18;VT=X	GT:DP:RO:AO	1/1:21:3:18	0/0:13:13:0	0/0:23:23:0	HET	20-80%
I	1617557	X-DeNovo	A	T	100	PASS	PH=PHASED-88-N2_SV_trim_bwaMEM_sort_modif.bam;FEX=PASS;FS=25/25;RN=NODE_CB3475_trim_bwaMEM_sort_modif.bam.generator.V2_140_L534_D15:5:4::MH0;MQ=60;cigar=534M;SB=0.555556;AS=2-1;CVT=X;HD=17_18_16_16_17_17_19_19_19_19_19_19_19_19_19_20_19_19_19_19_19_19_19_19_19_;AO=16;VT=X	GT:DP:RO:AO	0/1:43:27:16	0/0:10:10:0	0/0:52:52:0	HET	25-75%
I	1709429	X-DeNovo	A	T	100	PASS	PH=PHASED-57-N2_SV_trim_bwaMEM_sort_modif.bam;FEX=PASS;FS=25/25;RN=NODE_CB3475_trim_bwaMEM_sort_modif.bam.generator.V2_145_L484_D16:6:3::MH0;MQ=60;cigar=484M;SB=0.666667;AS=2-1;CVT=X;HD=14_15_16_16_16_16_16_16_16_16_16_17_17_17_17_18_18_17_17_17_17_17_16_16_16_;AO=14;VT=X	GT:DP:RO:AO	1/1:16:2:14	0/0:8:8:0	0/0:20:20:0	HET	41-59%
I	2153699	X-DeNovo	G	A	100	PASS	PH=none;FEX=PASS;FS=25/25;RN=NODE_CB3475_trim_bwaMEM_sort_modif.bam.generator.V2_190_L530_D14:6:4::MH0;MQ=60;cigar=530M;SB=0.6;AS=2-1;CVT=X;HD=12_12_13_13_13_13_14_14_14_14_14_14_14_14_15_15_15_15_15_16_16_16_16_16_16_;AO=12;VT=X	GT:DP:RO:AO	0/1:20:8:12	0/0:8:8:0	0/0:34:34:0	HET	39-61%
I	2574495	X-DeNovo	G	A	100	PASS	PH=PHASED-61-N2_SV_trim_bwaMEM_sort_modif.bam;FEX=PASS;FS=25/25;RN=NODE_CB3475_trim_bwaMEM_sort_modif.bam.generator.V2_228_L570_D24:8:6::MH0;MQ=60;cigar=570M;SB=0.571429;AS=2-1;CVT=X;HD=29_28_28_27_27_27_26_26_26_26_26_26_26_26_26_26_26_26_28_29_29_29_30_30_30_;AO=26;VT=X	GT:DP:RO:AO	0/1:33:7:26	0/0:9:9:0	0/0:34:34:0	HET	25-75%
I	2840782	X-DeNovo	G	A	100	PASS	PH=PHASED-39-N2_SV_trim_bwaMEM_sort_modif.bam;FEX=PASS;FS=25/25;RN=NODE_CB3475_trim_bwaMEM_sort_modif.bam.generator.V2_242_L629_D13:2:6::MH0;MQ=60;cigar=629M;SB=0.25;AS=2-1;CVT=X;HD=16_16_15_16_16_16_16_16_16_16_15_14_14_14_13_14_14_13_13_12_12_12_12_11_11_;AO=11;VT=X	GT:DP:RO:AO	0/1:14:3:11	0/0:11:11:0	0/0:26:26:0	HET	30-70%
I	2883182	9D-DeNovo	ATTGCCGAAT	A	85	PASS	PH=none;FEX=PASS;FS=17/20;RN=NODE_CB3475_trim_bwaMEM_sort_modif.bam.generator.V2_250_L311_D6:1:3::MH0;MQ=60;cigar=182M9D129M;SB=0.25;AS=2-3;CVT=9D;HD=-1_-1_-1_-1_-1_-1_-1_7_7_7_7_7_7_7_7_7_7_7_7_7_7_7_7_7_-1_-1_-1_-1_-1_-1_-1_-1_-1_-1_;AO=7;VT=DDDDDDDDD	GT:DP:RO:AO	0/1:21:14:7	0/0:9:9:0	0/0:34:34:0	HET	27-73%
I	2967105	X-DeNovo	G	A	100	PASS	PH=PHASED-53-N2_SV_trim_bwaMEM_sort_modif.bam;FEX=PASS;FS=25/25;RN=NODE_CB3475_trim_bwaMEM_sort_modif.bam.generator.V2_260_L513_D21:8:5::MH0;MQ=60;cigar=84M19I2M37D408M;SB=0.615385;AS=4-5;CVT=X;HD=27_27_27_27_28_28_28_28_28_28_28_28_28_28_28_28_27_28_28_28_28_28_28_28_28_;AO=27;VT=X	GT:DP:RO:AO	0/1:154:127:27	0/0:47:47:0	0/0:84:84:0	HET	22-78%
I	4712726	X-DeNovo	G	C	100	PASS	PH=none;FEX=PASS;FS=25/25;RN=NODE_CB3475_trim_bwaMEM_sort_modif.bam.generator.V2_331_L766_D22:9:7::MH0;MQ=60;cigar=766M;SB=0.5625;AS=2-1;CVT=X;HD=23_23_23_24_24_23_23_23_23_22_21_21_22_24_24_24_24_24_24_25_25_25_25_25_25_;AO=21;VT=X	GT:DP:RO:AO	0/1:26:5:21	0/0:11:11:0	0/0:35:35:0	HET	20-80%
I	5664431	DD-DeNovo	AAG	A	95.6522	PASS	PH=none;FEX=PASS;FS=22/23;RN=NODE_CB3475_trim_bwaMEM_sort_modif.bam.generator.V2_341_L381_D12:4:2::MH0;MQ=60;cigar=187M2D194M;SB=0.666667;AS=2-3;CVT=DD;HD=-1_-1_15_15_15_15_14_14_14_15_15_15_14_14_14_14_14_14_14_14_14_14_15_15_-1_-1_-1_;AO=14;VT=DD	GT:DP:RO:AO	0/1:26:12:14	0/0:9:9:0	0/0:35:35:0	HET	55-45%
I	6909335	8DX-DeNovo	CAAATCCGTA	CT	96.1538	PASS	PH=none;FEX=PASS;FS=25/26;RN=NODE_CB3475_trim_bwaMEM_sort_modif.bam.generator.V2_344_L450_D12:4:6::MH0;MQ=60;cigar=264M8D186M;SB=0.4;AS=2-3;CVT=8DX;HD=11_11_11_11_12_12_12_12_12_11_11_11_11_11_11_11_11_11_11_11_11_11_11_11_-1_-1_-1_-1_-1_-1_-1_-1_11_-1_-1_;AO=11;VT=DDDDDDDDX	GT:DP:RO:AO	0/1:31:20:11	0/0:9:9:0	0/0:38:38:0	HET	69-31%
I	8874630	X-DeNovo	G	T	100	PASS	PH=none;FEX=PASS;FS=25/25;RN=NODE_CB3475_trim_bwaMEM_sort_modif.bam.generator.V2_355_L359_D10:1:2::MH0;MQ=60;cigar=359M;SB=0.333333;AS=2-1;CVT=X;HD=12_12_13_12_12_12_12_12_12_12_12_11_11_11_10_10_10_10_10_10_10_10_10_10_10_;AO=10;VT=X	GT:DP:RO:AO	1/1:10:0:10	0/0:11:11:0	0/0:43:43:0	HOM	7-93%
I	12108213	19D-DeNovo	CCTTTTGTTACTTTATCCAT	C	96	PASS	PH=PHASED-261-N2_SV_trim_bwaMEM_sort_modif.bam;FEX=PASS;FS=24/25;RN=NODE_CB3475_trim_bwaMEM_sort_modif.bam.generator.V2_443_L441_D19:6:3::MH0;MQ=60;cigar=158M19D283M;SB=0.666667;AS=2-3;CVT=19D;HD=14_14_16_17_17_17_17_18_18_18_18_18_20_20_20_20_20_20_20_20_20_20_22_22_-1_-1_-1_-1_-1_-1_-1_-1_-1_-1_-1_-1_-1_-1_-1_-1_-1_-1_-1_-1_;AO=14;VT=DDDDDDDDDDDDDDDDDDD	GT:DP:RO:AO	1/1:14:0:14	0/0:15:15:0	.:0:0:0	HOM	1
I	12560006	X-DeNovo	C	T	100	PASS	PH=none;FEX=PASS;FS=25/25;RN=NODE_CB3475_trim_bwaMEM_sort_modif.bam.generator.V2_452_L651_D20:8:4::MH0;MQ=60;cigar=651M;SB=0.666667;AS=2-1;CVT=X;HD=22_22_22_22_21_22_22_22_22_21_21_21_21_22_21_21_21_21_21_22_22_22_22_22_22_;AO=21;VT=X	GT:DP:RO:AO	1/1:21:0:21	0/0:9:9:0	0/0:35:35:0	HOM	1
I	12706765	X-DeNovo	C	A	100	PASS	PH=PHASED-44-N2_SV_trim_bwaMEM_sort_modif.bam;FEX=PASS;FS=25/25;RN=NODE_CB3475_trim_bwaMEM_sort_modif.bam.generator.V2_454_L506_D15:5:3::MH0;MQ=60;cigar=506M;SB=0.625;AS=2-1;CVT=X;HD=17_17_17_17_17_17_17_17_16_15_15_14_13_14_14_14_14_14_15_15_15_15_15_15_15_;AO=13;VT=X	GT:DP:RO:AO	1/1:13:0:13	0/0:10:10:0	0/0:30:30:0	HOM	1
I	12889929	X-DeNovo	G	T	100	PASS	PH=none;FEX=PASS;FS=25/25;RN=NODE_CB3475_trim_bwaMEM_sort_modif.bam.generator.V2_464_L666_D15:6:3::MH0;MQ=60;cigar=666M;SB=0.666667;AS=2-1;CVT=X;HD=14_14_13_13_13_13_13_13_13_13_13_13_13_13_13_12_12_12_12_11_12_12_12_13_13_;AO=11;VT=X	GT:DP:RO:AO	1/1:11:0:11	0/0:12:12:0	0/0:46:46:0	HOM	6-94%
I	14599089	X-DeNovo	G	T	88	PASS	PH=PHASED-3-N2_SV_trim_bwaMEM_sort_modif.bam;FEX=PASS;FS=22/25;RN=NODE_CB3475_trim_bwaMEM_sort_modif.bam.generator.V2_523_L622_D11:3:4::MH0;MQ=60;cigar=622M;SB=0.428571;AS=2-1;CVT=X;HD=15_15_15_15_15_15_15_13_13_13_12_12_12_12_12_12_12_12_12_12_-1_-1_-1_12_12_;AO=12;VT=X	GT:DP:RO:AO	0/1:37:25:12	0/0:15:15:0	0/0:61:61:0	HET	11-89%
I	15065337	4654D-DeNovo	C	<DEL>	72	PASS	SVTYPE=DEL;END=15069992;SVLEN=-4654;PH=PHASED-1-Havaiian_SV_trim_bwaMEM_sort_modif.bam;FEX=Pass;FS=18/25;RN=NODE_CB3475_trim_bwaMEM_sort_modif.bam.generator.V2_546_L527_D18:1:4::MH0;MQ=60_and_0;cigar=306M221S_and_305S222M;SB=0.2;AS=1-2_and_1-2	GT:DP:RO:AO	0/0:2098:2078:20	0/0:1303:1303:0	0/0:5433:5433:0	REF
I	15067616	X-Mosaic	A	G	100	.	PH=none;FEX=PASS;FS=25/25;RN=NODE_CB3475_trim_bwaMEM_sort_modif.bam.generator.V2_545_L722_D43:24:17::MH0;MQ=60;cigar=447M8D275M;SB=0.585366;AS=4-3;CVT=X;HD=41_41_41_40_41_41_41_42_42_42_41_41_42_44_44_44_46_46_48_47_47_47_49_49_47_;AO=40;VT=X	GT:DP:RO:AO	0/0:2123:2083:40	0/0:1169:1169:0	0/0:5289:5289:0	REF
I	15067862	8D-Mosaic	CGTTGGATT	C	95.4545	.	PH=none;FEX=PASS;FS=21/22;RN=NODE_CB3475_trim_bwaMEM_sort_modif.bam.generator.V2_545_L722_D43:24:17::MH0;MQ=60;cigar=447M8D275M;SB=0.585366;AS=4-3;CVT=8D;HD=-1_-1_-1_51_48_49_46_46_46_46_45_46_46_46_46_45_45_45_45_41_42_42_42_41_-1_-1_-1_-1_-1_-1_-1_-1_-1_;AO=41;VT=DDDDDDDD	GT:DP:RO:AO	0/0:2069:2028:41	0/0:1313:1313:0	0/0:5433:5433:0	REF
II	2370933	X-DeNovo	G	T	84	PASS	PH=PHASED-293-N2_SV_trim_bwaMEM_sort_modif.bam;FEX=PASS;FS=21/25;RN=NODE_CB3475_trim_bwaMEM_sort_modif.bam.generator.V2_687_L482_D11:4:1::MH0;MQ=60;cigar=482M;SB=0.8;AS=2-1;CVT=X;HD=15_15_16_16_16_16_16_16_18_18_18_18_18_18_18_17_17_17_16_15_15_-1_-1_-1_-1_;AO=15;VT=X	GT:DP:RO:AO	0/1:26:11:15	0/0:10:10:0	0/0:48:48:0	HET
II	3813802	D-DeNovo	TA	T	81.25	PASS	PH=PHASED-1-Havaiian_SV_trim_bwaMEM_sort_modif.bam;FEX=PASS;FS=13/16;RN=NODE_CB3475_trim_bwaMEM_sort_modif.bam.generator.V2_772_L321_D9:5:3::MH0;MQ=43;cigar=175M1D146M;SB=0.625;AS=2-3;CVT=D;HD=-1_-1_-1_-1_-1_-1_-1_-1_-1_9_9_-1_-1_8_8_8_8_8_8_9_9_9_10_10_-1_-1_;AO=8;VT=D	GT:DP:RO:AO	0/1:23:15:8	0/0:9:9:0	0/0:29:29:0	HET
II	3831852	D-DeNovo	GT	G	93.3333	PASS	PH=PHASED-26-N2_SV_trim_bwaMEM_sort_modif.bam;FEX=PASS;FS=14/15;RN=NODE_CB3475_trim_bwaMEM_sort_modif.bam.generator.V2_776_L477_D15:2:3::MH0;MQ=60;cigar=299M1D178M;SB=0.4;AS=2-3;CVT=D;HD=-1_-1_-1_-1_-1_-1_-1_-1_-1_-1_20_21_21_21_20_20_20_20_19_19_19_19_19_19_-1_-1_;AO=19;VT=D	GT:DP:RO:AO	1/1:19:0:19	0/0:9:9:0	0/0:23:23:0	HOM
II	3860330	X-DeNovo	T	C	100	PASS	PH=none;FEX=PASS;FS=25/25;RN=NODE_CB3475_trim_bwaMEM_sort_modif.bam.generator.V2_780_L389_D19:4:3::MH0;MQ=60;cigar=389M;SB=0.571429;AS=2-1;CVT=X;HD=28_29_28_30_30_30_30_30_30_30_30_30_30_30_30_30_30_30_30_30_30_31_31_30_30_;AO=28;VT=X	GT:DP:RO:AO	1/1:28:0:28	0/0:14:14:0	0/0:39:39:0	HOM
II	4075316	I-DeNovo	C	CT	100	PASS	PH=PHASED-20-N2_SV_trim_bwaMEM_sort_modif.bam;FEX=PASS;FS=15/15;RN=NODE_CB3475_trim_bwaMEM_sort_modif.bam.generator.V2_795_L500_D13:3:4::MH0;MQ=60;cigar=359M1I140M;SB=0.428571;AS=2-3;CVT=I;HD=-1_-1_-1_-1_-1_-1_-1_-1_-1_-1_16_16_16_16_17_17_18_18_18_18_18_17_18_18_19_-1_;AO=16;VT=I	GT:DP:RO:AO	1/1:16:0:16	0/0:8:8:0	.:0:0:0	HOM
II	4120270	X-DeNovo	G	A	100	PASS	PH=none;FEX=PASS;FS=25/25;RN=NODE_CB3475_trim_bwaMEM_sort_modif.bam.generator.V2_800_L557_D11:6:2::MH0;MQ=60;cigar=557M;SB=0.75;AS=2-1;CVT=X;HD=14_14_14_14_14_14_14_14_14_14_15_15_15_15_15_15_14_14_14_15_15_15_15_15_15_;AO=14;VT=X	GT:DP:RO:AO	1/1:14:0:14	0/0:9:9:0	0/0:22:22:0	HOM
II	4331561	I-DeNovo	A	AT	100	PASS	PH=PHASED-25-N2_SV_trim_bwaMEM_sort_modif.bam;FEX=PASS;FS=18/18;RN=NODE_CB3475_trim_bwaMEM_sort_modif.bam.generator.V2_813_L385_D12:3:3::MH0;MQ=60;cigar=138M1I246M;SB=0.5;AS=2-3;CVT=I;HD=-1_-1_-1_-1_-1_-1_-1_17_16_16_18_18_18_18_18_18_19_19_19_19_18_19_19_19_19_-1_;AO=16;VT=I	GT:DP:RO:AO	1/1:16:0:16	0/0:9:9:0	0/0:28:28:0	HOM
II	4451182	X-DeNovo	A	C	100	PASS	PH=none;FEX=PASS;FS=25/25;RN=NODE_CB3475_trim_bwaMEM_sort_modif.bam.generator.V2_817_L406_D14:5:1::MH0;MQ=60;cigar=406M;SB=0.833333;AS=2-1;CVT=X;HD=13_13_13_13_13_13_13_13_13_13_13_13_13_13_13_11_11_11_12_12_12_13_13_12_12_;AO=11;VT=X	GT:DP:RO:AO	1/1:11:0:11	0/0:12:12:0	0/0:34:34:0	HOM
II	4530620	X-DeNovo	C	T	100	PASS	PH=none;FEX=PASS;FS=25/25;RN=NODE_CB3475_trim_bwaMEM_sort_modif.bam.generator.V2_820_L628_D15:5:4::MH0;MQ=60;cigar=628M;SB=0.555556;AS=2-1;CVT=X;HD=16_16_16_16_16_16_17_17_17_16_16_17_16_16_16_17_17_18_17_17_16_16_16_16_17_;AO=16;VT=X	GT:DP:RO:AO	1/1:16:0:16	0/0:8:8:0	0/0:34:34:0	HOM
II	4573694	D-DeNovo	GA	G	93.75	PASS	PH=PHASED-122-N2_SV_trim_bwaMEM_sort_modif.bam;FEX=PASS;FS=15/16;RN=NODE_CB3475_trim_bwaMEM_sort_modif.bam.generator.V2_821_L437_D15:6:3::MH0;MQ=60;cigar=247M1D190M;SB=0.666667;AS=2-3;CVT=D;HD=-1_-1_-1_-1_-1_-1_-1_-1_-1_18_18_18_18_18_18_18_18_18_18_17_17_17_16_16_-1_-1_;AO=16;VT=D	GT:DP:RO:AO	1/1:16:0:16	0/0:11:11:0	0/0:28:28:0	HOM
II	4594949	D-DeNovo	AT	A	92.8571	PASS	PH=PHASED-25-N2_SV_trim_bwaMEM_sort_modif.bam;FEX=PASS;FS=13/14;RN=NODE_CB3475_trim_bwaMEM_sort_modif.bam.generator.V2_825_L473_D10:2:2::MH0;MQ=60;cigar=229M1D244M;SB=0.5;AS=2-3;CVT=D;HD=-1_-1_-1_-1_-1_-1_-1_-1_-1_-1_-1_16_16_17_17_17_17_17_16_16_16_17_17_18_-1_-1_;AO=16;VT=D	GT:DP:RO:AO	1/1:16:0:16	0/0:11:11:0	0/0:28:28:0	HOM
II	4650252	D-DeNovo	CT	C	94.4444	PASS	PH=none;FEX=PASS;FS=17/18;RN=NODE_CB3475_trim_bwaMEM_sort_modif.bam.generator.V2_829_L407_D12:4:1::MH0;MQ=60;cigar=126M1D281M;SB=0.8;AS=2-3;CVT=D;HD=-1_-1_-1_-1_-1_-1_-1_17_17_17_17_17_17_17_17_17_17_17_17_17_17_17_17_17_-1_-1_;AO=17;VT=D	GT:DP:RO:AO	1/1:17:0:17	0/0:17:17:0	0/0:32:32:0	HOM
II	4926552	X-DeNovo	C	A	100	PASS	PH=none;FEX=PASS;FS=25/25;RN=NODE_CB3475_trim_bwaMEM_sort_modif.bam.generator.V2_837_L601_D20:4:6::MH0;MQ=60;cigar=601M;SB=0.4;AS=2-1;CVT=X;HD=21_21_22_22_22_22_22_22_22_21_21_20_20_20_20_20_21_21_22_23_22_22_22_22_21_;AO=20;VT=X	GT:DP:RO:AO	1/1:20:0:20	0/0:11:11:0	0/0:30:30:0	HOM
II	4958664	I-DeNovo	G	GA	100	PASS	PH=none;FEX=PASS;FS=16/16;RN=NODE_CB3475_trim_bwaMEM_sort_modif.bam.generator.V2_838_L451_D18:7:4::MH0;MQ=60;cigar=219M1I231M;SB=0.636364;AS=2-3;CVT=I;HD=-1_-1_-1_-1_-1_-1_-1_-1_-1_19_19_19_19_19_19_20_19_20_20_19_19_19_19_19_19_-1_;AO=19;VT=I	GT:DP:RO:AO	1/1:19:0:19	0/0:15:15:0	0/0:31:31:0	HOM
II	5162656	X-DeNovo	C	T	100	PASS	PH=PHASED-25-N2_SV_trim_bwaMEM_sort_modif.bam;FEX=PASS;FS=25/25;RN=NODE_CB3475_trim_bwaMEM_sort_modif.bam.generator.V2_843_L585_D17:5:5::MH0;MQ=60;cigar=585M;SB=0.5;AS=2-1;CVT=X;HD=20_19_18_18_18_17_18_18_18_18_18_18_18_18_17_17_17_16_16_16_16_16_16_17_17_;AO=16;VT=X	GT:DP:RO:AO	1/1:16:0:16	0/0:11:11:0	0/0:35:35:0	HOM
II	5273000	I-DeNovo	G	GT	100	PASS	PH=PHASED-25-N2_SV_trim_bwaMEM_sort_modif.bam;FEX=PASS;FS=15/15;RN=NODE_CB3475_trim_bwaMEM_sort_modif.bam.generator.V2_845_L315_D13:5:2::MH0;MQ=60;cigar=177M1I137M;SB=0.714286;AS=2-3;CVT=I;HD=-1_-1_-1_-1_-1_-1_-1_-1_-1_-1_18_19_18_18_17_17_17_17_17_17_17_15_15_16_16_-1_;AO=15;VT=I	GT:DP:RO:AO	1/1:15:0:15	0/0:13:13:0	0/0:38:38:0	HOM
II	5320159	X-DeNovo	G	T	100	PASS	PH=none;FEX=PASS;FS=25/25;RN=NODE_CB3475_trim_bwaMEM_sort_modif.bam.generator.V2_848_L467_D12:4:2::MH0;MQ=60;cigar=467M;SB=0.666667;AS=2-1;CVT=X;HD=15_15_15_15_15_15_15_15_14_14_14_14_14_14_14_15_16_16_16_16_16_16_16_17_17_;AO=14;VT=X	GT:DP:RO:AO	1/1:14:0:14	0/0:11:11:0	0/0:36:36:0	HOM
II	5614836	D-DeNovo	GT	G	93.3333	PASS	PH=PHASED-25-N2_SV_trim_bwaMEM_sort_modif.bam;FEX=PASS;FS=14/15;RN=NODE_CB3475_trim_bwaMEM_sort_modif.bam.generator.V2_852_L442_D9:3:2::MH0;MQ=60;cigar=225M1D217M;SB=0.6;AS=2-3;CVT=D;HD=-1_-1_-1_-1_-1_-1_-1_-1_-1_-1_9_8_8_8_8_9_10_9_9_9_9_9_9_9_-1_-1_;AO=8;VT=D	GT:DP:RO:AO	1/1:8:0:8	0/0:11:11:0	0/0:33:33:0	HOM
II	5625918	X-DeNovo	T	C	100	PASS	PH=PHASED-37-N2_SV_trim_bwaMEM_sort_modif.bam;FEX=PASS;FS=25/25;RN=NODE_CB3475_trim_bwaMEM_sort_modif.bam.generator.V2_853_L715_D20:6:6::MH0;MQ=60;cigar=715M;SB=0.5;AS=2-1;CVT=X;HD=24_24_22_20_20_20_22_22_22_22_22_22_21_21_21_22_20_20_19_19_19_18_18_18_17_;AO=17;VT=X	GT:DP:RO:AO	1/1:17:0:17	0/0:11:11:0	0/0:40:40:0	HOM
II	5676585	X-DeNovo	C	T	100	PASS	PH=none;FEX=PASS;FS=25/25;RN=NODE_CB3475_trim_bwaMEM_sort_modif.bam.generator.V2_854_L518_D17:3:7::MH0;MQ=60;cigar=518M;SB=0.3;AS=2-1;CVT=X;HD=19_19_19_19_19_19_19_19_19_19_19_18_18_18_19_19_19_19_19_19_19_20_20_18_18_;AO=18;VT=X	GT:DP:RO:AO	1/1:18:0:18	0/0:11:11:0	0/0:31:31:0	HOM
II	5840039	X-DeNovo	G	A	8	PASS	PH=PHASED-25-N2_SV_trim_bwaMEM_sort_modif.bam;FEX=PASS;FS=2/25;RN=NODE_CB3475_trim_bwaMEM_sort_modif.bam.generator.V2_858_L422_D18:4:3::MH0;MQ=60;cigar=422M;SB=0.571429;AS=3-1;CVT=X;HD=24_24_-1_-1_-1_-1_-1_-1_-1_-1_-1_-1_-1_-1_-1_-1_-1_-1_-1_-1_-1_-1_-1_-1_-1_;AO=24;VT=X	GT:DP:RO:AO	1/1:24:0:24	0/0:10:10:0	0/0:28:28:0	HOM
II	5962264	D-DeNovo	CA	C	93.75	PASS	PH=none;FEX=PASS;FS=15/16;RN=NODE_CB3475_trim_bwaMEM_sort_modif.bam.generator.V2_863_L692_D16:4:3::MH0;MQ=60;cigar=228M1D464M;SB=0.571429;AS=2-3;CVT=D;HD=-1_-1_-1_-1_-1_-1_-1_-1_-1_25_24_24_24_24_24_24_24_24_24_23_23_23_23_23_-1_-1_;AO=23;VT=D	GT:DP:RO:AO	1/1:23:0:23	0/0:8:8:0	0/0:26:26:0	HOM
II	5965542	I-DeNovo	A	AT	100	PASS	PH=PHASED-24-N2_SV_trim_bwaMEM_sort_modif.bam;FEX=PASS;FS=17/17;RN=NODE_CB3475_trim_bwaMEM_sort_modif.bam.generator.V2_865_L577_D20:7:4::MH0;MQ=60;cigar=237M1I339M;SB=0.636364;AS=2-3;CVT=I;HD=-1_-1_-1_-1_-1_-1_-1_-1_23_23_23_23_25_26_26_26_26_26_26_26_26_25_25_25_24_-1_;AO=23;VT=I	GT:DP:RO:AO	1/1:23:0:23	0/0:15:15:0	0/0:31:31:0	HOM
II	5993647	I-DeNovo	G	GT	93.3333	PASS	PH=none;FEX=PASS;FS=14/15;RN=NODE_CB3475_trim_bwaMEM_sort_modif.bam.generator.V2_866_L406_D10:1:4::MH0;MQ=60;cigar=225M1I180M;SB=0.2;AS=2-3;CVT=I;HD=-1_-1_-1_-1_-1_-1_-1_-1_-1_-1_12_12_14_15_15_15_15_16_16_16_17_17_18_18_-1_-1_;AO=12;VT=I	GT:DP:RO:AO	1/1:12:0:12	0/0:10:10:0	0/0:28:28:0	HOM
II	6282614	I-DeNovo	A	AT	100	PASS	PH=none;FEX=PASS;FS=17/17;RN=NODE_CB3475_trim_bwaMEM_sort_modif.bam.generator.V2_872_L537_D17:7:5::MH0;MQ=60;cigar=234M1I302M;SB=0.583333;AS=2-3;CVT=I;HD=-1_-1_-1_-1_-1_-1_-1_-1_21_21_22_22_21_21_22_22_22_22_22_22_22_22_22_23_23_-1_;AO=21;VT=I	GT:DP:RO:AO	1/1:21:0:21	0/0:9:9:0	0/0:39:39:0	HOM
II	6551539	D-DeNovo	TA	T	95.2381	PASS	PH=PHASED-37-N2_SV_trim_bwaMEM_sort_modif.bam;FEX=PASS;FS=20/21;RN=NODE_CB3475_trim_bwaMEM_sort_modif.bam.generator.V2_877_L417_D11:3:5::MH0;MQ=60;cigar=223M1D194M;SB=0.375;AS=2-3;CVT=D;HD=-1_-1_-1_-1_16_16_16_16_16_14_15_15_15_15_16_16_17_17_17_17_18_18_18_18_-1_-1_;AO=14;VT=D	GT:DP:RO:AO	1/1:14:0:14	0/0:8:8:0	0/0:27:27:0	HOM
II	6626224	X-DeNovo	T	C	100	PASS	PH=none;FEX=PASS;FS=25/25;RN=NODE_CB3475_trim_bwaMEM_sort_modif.bam.generator.V2_878_L496_D22:5:7::MH0;MQ=60;cigar=496M;SB=0.416667;AS=2-1;CVT=X;HD=27_24_24_24_24_24_25_26_25_24_24_24_24_24_25_25_24_23_23_24_24_24_22_20_19_;AO=19;VT=X	GT:DP:RO:AO	1/1:19:0:19	0/0:9:9:0	0/0:31:31:0	HOM
II	6627369	D-DeNovo	TA	T	93.75	PASS	PH=none;FEX=PASS;FS=15/16;RN=NODE_CB3475_trim_bwaMEM_sort_modif.bam.generator.V2_880_L320_D9:3:2::MH0;MQ=60;cigar=118M1D202M;SB=0.6;AS=2-3;CVT=D;HD=-1_-1_-1_-1_-1_-1_-1_-1_-1_14_14_14_14_14_14_14_14_14_13_13_13_13_13_14_-1_-1_;AO=13;VT=D	GT:DP:RO:AO	1/1:13:0:13	0/0:11:11:0	0/0:40:40:0	HOM
II	6638376	X-DeNovo	C	T	100	PASS	PH=none;FEX=PASS;FS=25/25;RN=NODE_CB3475_trim_bwaMEM_sort_modif.bam.generator.V2_882_L491_D19:3:5::MH0;MQ=60;cigar=491M;SB=0.375;AS=2-1;CVT=X;HD=24_26_27_28_28_28_28_28_28_27_27_28_29_29_28_28_27_28_28_28_28_28_28_28_28_;AO=24;VT=X	GT:DP:RO:AO	1/1:24:0:24	0/0:11:11:0	0/0:46:46:0	HOM
II	6762520	X-DeNovo	C	T	100	PASS	PH=PHASED-82-N2_SV_trim_bwaMEM_sort_modif.bam;FEX=PASS;FS=25/25;RN=NODE_CB3475_trim_bwaMEM_sort_modif.bam.generator.V2_885_L779_D14:6:6::MH0;MQ=60;cigar=779M;SB=0.5;AS=3-1;CVT=X;HD=18_17_17_17_16_16_16_16_16_15_16_17_17_17_17_17_17_17_17_16_16_16_16_15_14_;AO=14;VT=X	GT:DP:RO:AO	1/1:14:0:14	0/0:11:11:0	0/0:42:42:0	HOM
II	6859782	X-DeNovo	T	G	100	PASS	PH=none;FEX=PASS;FS=25/25;RN=NODE_CB3475_trim_bwaMEM_sort_modif.bam.generator.V2_887_L533_D16:4:3::MH0;MQ=60;cigar=533M;SB=0.571429;AS=2-1;CVT=X;HD=18_18_16_16_16_17_17_17_18_19_19_19_18_18_17_17_17_16_16_16_15_15_15_15_15_;AO=15;VT=X	GT:DP:RO:AO	1/1:15:0:15	0/0:13:13:0	0/0:30:30:0	HOM
II	7172366	X-DeNovo	C	T	100	PASS	PH=PHASED-7-N2_SV_trim_bwaMEM_sort_modif.bam;FEX=PASS;FS=25/25;RN=NODE_CB3475_trim_bwaMEM_sort_modif.bam.generator.V2_895_L660_D16:5:6::MH0;MQ=60;cigar=660M;SB=0.454545;AS=2-1;CVT=X;HD=17_17_17_16_15_16_17_18_19_20_19_19_20_21_20_19_19_18_17_16_16_16_16_16_16_;AO=15;VT=X	GT:DP:RO:AO	1/1:15:0:15	0/0:8:8:0	0/0:31:31:0	HOM
II	7341055	X-DeNovo	G	T	100	PASS	PH=none;FEX=PASS;FS=25/25;RN=NODE_CB3475_trim_bwaMEM_sort_modif.bam.generator.V2_902_L423_D10:2:6::MH0;MQ=60;cigar=423M;SB=0.25;AS=2-1;CVT=X;HD=8_8_9_9_9_9_9_9_9_9_9_9_8_8_8_8_9_10_10_10_10_10_10_10_10_;AO=8;VT=X	GT:DP:RO:AO	1/1:8:0:8	0/0:10:10:0	0/0:25:25:0	HOM
II	7444326	D-DeNovo	AT	A	94.1176	PASS	PH=PHASED-226-N2_SV_trim_bwaMEM_sort_modif.bam;FEX=PASS;FS=16/17;RN=NODE_CB3475_trim_bwaMEM_sort_modif.bam.generator.V2_906_L406_D11:1:6::MH0;MQ=55;cigar=136M1D270M;SB=0.142857;AS=2-3;CVT=D;HD=-1_-1_-1_-1_-1_-1_-1_-1_16_16_16_17_17_17_17_16_16_17_17_17_17_17_17_17_-1_-1_;AO=16;VT=D	GT:DP:RO:AO	0/1:23:7:16	0/0:14:14:0	.:0:0:0	HET
II	7448238	X-Mosaic	C	T	96	.	PH=none;FEX=PASS;FS=24/25;RN=NODE_CB3475_trim_bwaMEM_sort_modif.bam.generator.V2_904_L435_D12:6:2::MH0;MQ=60;cigar=435M;SB=0.75;AS=2-1;CVT=X;HD=18_17_17_17_17_17_17_17_17_17_18_17_17_17_17_17_17_15_16_15_15_15_16_16_-1_;AO=15;VT=X	GT:DP:RO:AO	0/0:188:173:15	0/0:126:126:0	0/0:591:591:0	REF
II	7455663	X-DeNovo	G	T	100	PASS	PH=PHASED-25-N2_SV_trim_bwaMEM_sort_modif.bam;FEX=PASS;FS=25/25;RN=NODE_CB3475_trim_bwaMEM_sort_modif.bam.generator.V2_907_L482_D17:6:3::MH0;MQ=60;cigar=482M;SB=0.666667;AS=2-1;CVT=X;HD=21_21_21_22_22_22_22_20_21_22_22_21_21_21_20_20_20_20_20_19_21_20_20_20_20_;AO=19;VT=X	GT:DP:RO:AO	0/1:34:15:19	0/0:17:17:0	0/0:78:78:0	HET
II	7526751	X-DeNovo	C	T	100	PASS	PH=PHASED-33-N2_SV_trim_bwaMEM_sort_modif.bam;FEX=PASS;FS=25/25;RN=NODE_CB3475_trim_bwaMEM_sort_modif.bam.generator.V2_910_L538_D17:6:2::MH0;MQ=60;cigar=538M;SB=0.75;AS=2-1;CVT=X;HD=19_19_19_19_19_18_18_18_18_17_17_17_17_16_17_15_15_15_15_15_15_16_16_16_17_;AO=15;VT=X	GT:DP:RO:AO	1/1:15:0:15	0/0:11:11:0	0/0:26:26:0	HOM
II	7612377	I-DeNovo	C	CT	100	PASS	PH=none;FEX=PASS;FS=18/18;RN=NODE_CB3475_trim_bwaMEM_sort_modif.bam.generator.V2_914_L597_D19:8:3::MH0;MQ=60;cigar=195M1I401M;SB=0.727273;AS=2-3;CVT=I;HD=-1_-1_-1_-1_-1_-1_-1_21_22_22_21_21_21_21_23_23_23_21_22_21_21_21_21_22_22_-1_;AO=21;VT=I	GT:DP:RO:AO	1/1:21:0:21	0/0:8:8:0	0/0:29:29:0	HOM
II	7739098	X-DeNovo	C	T	100	PASS	PH=PHASED-5-N2_SV_trim_bwaMEM_sort_modif.bam;FEX=PASS;FS=25/25;RN=NODE_CB3475_trim_bwaMEM_sort_modif.bam.generator.V2_916_L962_D18:4:9::MH0;MQ=60;cigar=962M;SB=0.307692;AS=2-1;CVT=X;HD=22_22_22_22_23_21_21_21_21_21_21_21_21_21_20_20_20_20_20_20_20_20_20_20_20_;AO=20;VT=X	GT:DP:RO:AO	1/1:20:0:20	0/0:13:13:0	0/0:31:31:0	HOM
II	7978146	D-DeNovo	TA	T	95	PASS	PH=none;FEX=PASS;FS=19/20;RN=NODE_CB3475_trim_bwaMEM_sort_modif.bam.generator.V2_920_L483_D11:5:2::MH0;MQ=60;cigar=180M1D303M;SB=0.714286;AS=2-3;CVT=D;HD=-1_-1_-1_-1_-1_13_13_13_13_13_14_14_14_14_14_14_14_14_14_14_14_14_14_14_-1_-1_;AO=13;VT=D	GT:DP:RO:AO	1/1:13:0:13	0/0:10:10:0	0/0:20:20:0	HOM
II	8231047	D-DeNovo	CA	C	93.3333	PASS	PH=none;FEX=PASS;FS=14/15;RN=NODE_CB3475_trim_bwaMEM_sort_modif.bam.generator.V2_923_L475_D17:3:3::MH0;MQ=60;cigar=210M1D265M;SB=0.5;AS=3-3;CVT=D;HD=-1_-1_-1_-1_-1_-1_-1_-1_-1_-1_20_19_19_19_19_19_19_19_20_21_22_22_22_22_-1_-1_;AO=19;VT=D	GT:DP:RO:AO	1/1:19:0:19	0/0:10:10:0	0/0:31:31:0	HOM
II	8299799	X-DeNovo	C	T	100	PASS	PH=none;FEX=PASS;FS=25/25;RN=NODE_CB3475_trim_bwaMEM_sort_modif.bam.generator.V2_927_L344_D12:3:4::MH0;MQ=60;cigar=344M;SB=0.428571;AS=2-1;CVT=X;HD=17_17_17_17_17_17_15_17_17_17_17_17_17_17_17_17_17_16_16_16_16_15_15_15_15_;AO=15;VT=X	GT:DP:RO:AO	1/1:15:0:15	0/0:11:11:0	0/0:21:21:0	HOM
II	8372350	I-DeNovo	T	TA	100	PASS	PH=PHASED-32-N2_SV_trim_bwaMEM_sort_modif.bam;FEX=PASS;FS=17/17;RN=NODE_CB3475_trim_bwaMEM_sort_modif.bam.generator.V2_931_L534_D15:6:2::MH0;MQ=60;cigar=265M1I268M;SB=0.75;AS=2-3;CVT=I;HD=-1_-1_-1_-1_-1_-1_-1_-1_17_17_17_17_17_16_16_16_16_16_16_16_16_15_15_16_15_-1_;AO=15;VT=I	GT:DP:RO:AO	1/1:15:0:15	0/0:10:10:0	0/0:31:31:0	HOM
II	8420919	I-DeNovo	G	GA	100	PASS	PH=none;FEX=PASS;FS=18/18;RN=NODE_CB3475_trim_bwaMEM_sort_modif.bam.generator.V2_932_L439_D13:2:4::MH0;MQ=60;cigar=250M1I188M;SB=0.333333;AS=2-3;CVT=I;HD=-1_-1_-1_-1_-1_-1_-1_17_17_17_16_17_17_17_17_17_17_17_17_17_17_19_18_18_17_-1_;AO=16;VT=I	GT:DP:RO:AO	1/1:16:0:16	0/0:11:11:0	0/0:33:33:0	HOM
II	8468698	D-DeNovo	AT	A	92.3077	PASS	PH=none;FEX=PASS;FS=12/13;RN=NODE_CB3475_trim_bwaMEM_sort_modif.bam.generator.V2_933_L578_D16:4:5::MH0;MQ=60;cigar=317M1D261M;SB=0.444444;AS=2-3;CVT=D;HD=-1_-1_-1_-1_-1_-1_-1_-1_-1_-1_-1_-1_19_19_20_20_20_21_21_21_20_20_20_19_-1_-1_;AO=19;VT=D	GT:DP:RO:AO	0/1:32:13:19	0/0:12:12:0	0/0:38:38:0	HET
II	8697351	X-DeNovo	C	T	100	PASS	PH=none;FEX=PASS;FS=25/25;RN=NODE_CB3475_trim_bwaMEM_sort_modif.bam.generator.V2_939_L486_D13:4:3::MH0;MQ=60;cigar=20S466M;SB=0.571429;AS=2-2;CVT=X;HD=17_16_16_16_16_16_15_15_15_15_15_14_14_13_14_14_14_14_15_16_16_15_15_15_15_;AO=13;VT=X	GT:DP:RO:AO	1/1:13:0:13	0/0:11:11:0	0/0:32:32:0	HOM
II	8813138	D-DeNovo	TA	T	94.1176	PASS	PH=PHASED-89-N2_SV_trim_bwaMEM_sort_modif.bam;FEX=PASS;FS=16/17;RN=NODE_CB3475_trim_bwaMEM_sort_modif.bam.generator.V2_941_L455_D14:2:3::MH0;MQ=60;cigar=276M1D179M;SB=0.4;AS=2-3;CVT=D;HD=-1_-1_-1_-1_-1_-1_-1_-1_20_20_20_21_22_21_20_21_21_21_21_20_20_21_20_20_-1_-1_;AO=20;VT=D	GT:DP:RO:AO	1/1:20:0:20	0/0:10:10:0	0/0:23:23:0	HOM
II	8873116	I-DeNovo	C	CT	100	PASS	PH=PHASED-18-N2_SV_trim_bwaMEM_sort_modif.bam;FEX=PASS;FS=17/17;RN=NODE_CB3475_trim_bwaMEM_sort_modif.bam.generator.V2_943_L499_D14:5:3::MH0;MQ=60;cigar=178M1I320M;SB=0.625;AS=2-3;CVT=I;HD=-1_-1_-1_-1_-1_-1_-1_-1_15_15_15_14_14_14_15_15_16_17_18_18_18_18_18_18_18_-1_;AO=14;VT=I	GT:DP:RO:AO	1/1:14:0:14	0/0:13:13:0	0/0:26:26:0	HOM
II	9028803	D-DeNovo	TA	T	75	PASS	PH=none;FEX=PASS;FS=12/16;RN=NODE_CB3475_trim_bwaMEM_sort_modif.bam.generator.V2_944_L529_D15:5:2::MH0;MQ=60;cigar=299M1D230M;SB=0.714286;AS=2-3;CVT=D;HD=-1_-1_-1_-1_-1_-1_-1_-1_-1_19_18_17_16_16_16_16_16_15_14_14_14_-1_-1_-1_-1_-1_;AO=14;VT=D	GT:DP:RO:AO	1/1:14:0:14	0/0:12:12:0	.:0:0:0	HOM
II	9276849	X-DeNovo	C	T	100	PASS	PH=none;FEX=PASS;FS=25/25;RN=NODE_CB3475_trim_bwaMEM_sort_modif.bam.generator.V2_950_L497_D12:2:5::MH0;MQ=60;cigar=497M;SB=0.285714;AS=2-1;CVT=X;HD=14_14_14_14_13_13_13_13_13_13_13_13_13_13_13_13_14_14_14_14_14_14_14_14_15_;AO=13;VT=X	GT:DP:RO:AO	1/1:13:0:13	0/0:11:11:0	0/0:33:33:0	HOM
II	9685574	X-DeNovo	C	T	100	PASS	PH=none;FEX=PASS;FS=25/25;RN=NODE_CB3475_trim_bwaMEM_sort_modif.bam.generator.V2_955_L422_D16:2:6::MH0;MQ=60;cigar=422M;SB=0.25;AS=2-1;CVT=X;HD=20_20_20_20_18_18_18_18_18_18_18_18_18_18_18_19_19_19_19_18_18_18_18_18_18_;AO=18;VT=X	GT:DP:RO:AO	1/1:18:0:18	0/0:9:9:0	0/0:40:40:0	HOM
II	9859228	D-DeNovo	TC	T	94.4444	PASS	PH=none;FEX=PASS;FS=17/18;RN=NODE_CB3475_trim_bwaMEM_sort_modif.bam.generator.V2_960_L563_D23:11:3::MH0;MQ=60;cigar=182M1D381M;SB=0.785714;AS=2-3;CVT=D;HD=-1_-1_-1_-1_-1_-1_-1_24_24_24_25_24_24_25_25_24_24_26_27_27_27_27_27_27_-1_-1_;AO=24;VT=D	GT:DP:RO:AO	1/1:24:0:24	0/0:12:12:0	0/0:37:37:0	HOM
II	9995842	X-DeNovo	C	T	100	PASS	PH=PHASED-50-N2_SV_trim_bwaMEM_sort_modif.bam;FEX=PASS;FS=25/25;RN=NODE_CB3475_trim_bwaMEM_sort_modif.bam.generator.V2_967_L530_D13:5:3::MH0;MQ=60;cigar=530M;SB=0.625;AS=2-1;CVT=X;HD=17_17_18_18_18_16_16_16_16_16_16_16_16_17_17_17_17_17_17_17_17_17_17_17_16_;AO=16;VT=X	GT:DP:RO:AO	1/1:16:0:16	0/0:8:8:0	0/0:31:31:0	HOM
II	10056960	X-DeNovo	C	T	100	PASS	PH=none;FEX=PASS;FS=25/25;RN=NODE_CB3475_trim_bwaMEM_sort_modif.bam.generator.V2_970_L484_D12:4:4::MH0;MQ=60;cigar=484M;SB=0.5;AS=2-1;CVT=X;HD=12_12_12_12_12_12_12_12_12_12_12_12_12_12_12_12_12_12_12_12_12_13_13_13_12_;AO=12;VT=X	GT:DP:RO:AO	1/1:12:0:12	0/0:11:11:0	0/0:22:22:0	HOM
II	10267383	I-DeNovo	G	GT	100	PASS	PH=PHASED-25-N2_SV_trim_bwaMEM_sort_modif.bam;FEX=PASS;FS=15/15;RN=NODE_CB3475_trim_bwaMEM_sort_modif.bam.generator.V2_974_L447_D12:1:3::MH0;MQ=60;cigar=272M1I174M;SB=0.25;AS=2-3;CVT=I;HD=-1_-1_-1_-1_-1_-1_-1_-1_-1_-1_18_18_18_19_19_19_19_19_19_18_18_17_17_17_16_-1_;AO=16;VT=I	GT:DP:RO:AO	1/1:16:0:16	0/0:8:8:0	0/0:26:26:0	HOM
II	10361122	D-DeNovo	CA	C	94.1176	PASS	PH=none;FEX=PASS;FS=16/17;RN=NODE_CB3475_trim_bwaMEM_sort_modif.bam.generator.V2_975_L383_D11:3:1::MH0;MQ=60;cigar=139M1D244M;SB=0.75;AS=2-3;CVT=D;HD=-1_-1_-1_-1_-1_-1_-1_-1_14_14_14_13_12_13_11_11_11_11_11_11_12_12_12_12_-1_-1_;AO=11;VT=D	GT:DP:RO:AO	1/1:11:0:11	0/0:10:10:0	0/0:31:31:0	HOM
II	10698009	D-DeNovo	GT	G	94.1176	PASS	PH=none;FEX=PASS;FS=16/17;RN=NODE_CB3475_trim_bwaMEM_sort_modif.bam.generator.V2_984_L405_D14:2:8::MH0;MQ=60;cigar=249M1D156M;SB=0.2;AS=2-3;CVT=D;HD=-1_-1_-1_-1_-1_-1_-1_-1_17_16_17_17_17_16_16_16_16_16_16_16_16_16_16_16_-1_-1_;AO=16;VT=D	GT:DP:RO:AO	1/1:16:0:16	0/0:8:8:0	0/0:20:20:0	HOM
II	10914569	D-DeNovo	CA	C	64.2857	PASS	PH=none;FEX=PASS;FS=9/14;RN=NODE_CB3475_trim_bwaMEM_sort_modif.bam.generator.V2_988_L495_D14:4:4::MH0;MQ=60;cigar=274M1D221M;SB=0.5;AS=2-3;CVT=D;HD=-1_-1_-1_-1_-1_-1_-1_-1_-1_-1_-1_-1_15_15_16_-1_-1_-1_17_17_17_17_17_18_-1_-1_;AO=15;VT=D	GT:DP:RO:AO	1/1:15:0:15	0/0:12:12:0	0/0:3:3:0	HOM
II	11027067	X-DeNovo	C	T	100	PASS	PH=none;FEX=PASS;FS=25/25;RN=NODE_CB3475_trim_bwaMEM_sort_modif.bam.generator.V2_989_L466_D14:4:2::MH0;MQ=60;cigar=466M;SB=0.666667;AS=2-1;CVT=X;HD=17_16_16_15_15_15_14_14_14_14_14_14_14_14_14_14_14_15_16_16_16_16_17_16_16_;AO=14;VT=X	GT:DP:RO:AO	1/1:14:0:14	0/0:9:9:0	0/0:17:17:0	HOM
II	11520352	I-DeNovo	G	GT	100	PASS	PH=PHASED-35-N2_SV_trim_bwaMEM_sort_modif.bam;FEX=PASS;FS=16/16;RN=NODE_CB3475_trim_bwaMEM_sort_modif.bam.generator.V2_999_L595_D23:4:8::MH0;MQ=60;cigar=354M1I240M;SB=0.333333;AS=2-3;CVT=I;HD=-1_-1_-1_-1_-1_-1_-1_-1_-1_31_31_31_30_30_31_31_31_31_32_32_32_31_31_31_32_-1_;AO=30;VT=I	GT:DP:RO:AO	1/1:30:0:30	0/0:7:7:0	0/0:26:26:0	HOM
II	11577510	I-DeNovo	G	GT	100	PASS	PH=none;FEX=PASS;FS=16/16;RN=NODE_CB3475_trim_bwaMEM_sort_modif.bam.generator.V2_1001_L518_D15:8:1::MH0;MQ=60;cigar=207M1I310M;SB=0.888889;AS=2-3;CVT=I;HD=-1_-1_-1_-1_-1_-1_-1_-1_-1_19_19_19_19_19_19_19_20_20_20_20_20_18_18_17_17_-1_;AO=17;VT=I	GT:DP:RO:AO	1/1:17:0:17	0/0:7:7:0	0/0:20:20:0	HOM
II	11702920	D-DeNovo	CA	C	93.75	PASS	PH=PHASED-25-N2_SV_trim_bwaMEM_sort_modif.bam;FEX=PASS;FS=15/16;RN=NODE_CB3475_trim_bwaMEM_sort_modif.bam.generator.V2_1005_L460_D10:4:3::MH0;MQ=60;cigar=254M1D206M;SB=0.571429;AS=2-3;CVT=D;HD=-1_-1_-1_-1_-1_-1_-1_-1_-1_13_13_13_13_12_12_12_12_12_12_13_13_13_13_12_-1_-1_;AO=12;VT=D	GT:DP:RO:AO	1/1:12:0:12	0/0:10:10:0	0/0:34:34:0	HOM
II	11745847	D-DeNovo	CA	C	93.75	PASS	PH=PHASED-24-N2_SV_trim_bwaMEM_sort_modif.bam;FEX=PASS;FS=15/16;RN=NODE_CB3475_trim_bwaMEM_sort_modif.bam.generator.V2_1011_L353_D9:1:4::MH0;MQ=60;cigar=130M1D223M;SB=0.2;AS=2-3;CVT=D;HD=-1_-1_-1_-1_-1_-1_-1_-1_-1_12_11_11_11_11_12_12_13_13_13_13_12_10_10_10_-1_-1_;AO=10;VT=D	GT:DP:RO:AO	0/1:33:23:10	0/0:8:8:0	0/0:26:26:0	HET
II	12050303	D-DeNovo	AT	A	86.6667	PASS	PH=none;FEX=PASS;FS=13/15;RN=NODE_CB3475_trim_bwaMEM_sort_modif.bam.generator.V2_1019_L364_D14:3:1::MH0;MQ=60;cigar=137M1D227M;SB=0.75;AS=2-3;CVT=D;HD=-1_-1_-1_-1_-1_-1_-1_-1_-1_-1_24_24_24_23_22_23_-1_23_23_23_24_24_24_24_-1_-1_;AO=22;VT=D	GT:DP:RO:AO	1/1:22:0:22	0/0:10:10:0	.:0:0:0	HOM
II	12106526	I-DeNovo	A	AT	100	PASS	PH=none;FEX=PASS;FS=15/15;RN=NODE_CB3475_trim_bwaMEM_sort_modif.bam.generator.V2_1032_L319_D5:1:1::MH0;MQ=60;cigar=185M1I133M;SB=0.5;AS=2-3;CVT=I;HD=-1_-1_-1_-1_-1_-1_-1_-1_-1_-1_8_7_7_7_7_7_7_7_7_7_7_7_7_7_8_-1_;AO=7;VT=I	GT:DP:RO:AO	1/1:7:0:7	0/0:11:11:0	0/0:17:17:0	HOM
II	12358678	I-DeNovo	C	CA	100	PASS	PH=PHASED-33-N2_SV_trim_bwaMEM_sort_modif.bam;FEX=PASS;FS=17/17;RN=NODE_CB3475_trim_bwaMEM_sort_modif.bam.generator.V2_1059_L343_D10:3:1::MH0;MQ=60;cigar=198M1I144M;SB=0.75;AS=2-3;CVT=I;HD=-1_-1_-1_-1_-1_-1_-1_-1_19_19_19_18_17_17_16_15_16_16_18_17_17_14_14_15_15_-1_;AO=14;VT=I	GT:DP:RO:AO	1/1:14:0:14	0/0:7:7:0	0/0:28:28:0	HOM
II	12892945	X-DeNovo	C	T	28	PASS	PH=PHASED-8-N2_SV_trim_bwaMEM_sort_modif.bam;FEX=PASS;FS=7/25;RN=NODE_CB3475_trim_bwaMEM_sort_modif.bam.generator.V2_1103_L620_D17:6:5::MH0;MQ=60;cigar=620M;SB=0.545455;AS=2-1;CVT=X;HD=-1_-1_-1_-1_-1_-1_-1_-1_-1_-1_-1_-1_-1_-1_-1_-1_-1_-1_24_25_24_24_23_23_25_;AO=23;VT=X	GT:DP:RO:AO	0/1:82:59:23	0/0:10:10:0	0/0:34:34:0	HET
II	12919617	X-DeNovo	C	T	100	PASS	PH=none;FEX=PASS;FS=25/25;RN=NODE_CB3475_trim_bwaMEM_sort_modif.bam.generator.V2_1104_L370_D12:3:2::MH0;MQ=60;cigar=370M;SB=0.6;AS=2-1;CVT=X;HD=11_11_11_11_11_11_11_11_10_10_10_10_11_11_11_11_11_11_11_11_11_11_13_13_13_;AO=10;VT=X	GT:DP:RO:AO	0/1:30:20:10	0/0:22:22:0	0/0:72:72:0	HET
II	13046558	X-DeNovo	G	A	100	PASS	PH=none;FEX=PASS;FS=25/25;RN=NODE_CB3475_trim_bwaMEM_sort_modif.bam.generator.V2_1108_L448_D13:1:5::MH0;MQ=50;cigar=448M;SB=0.166667;AS=2-1;CVT=X;HD=14_14_14_14_14_14_13_13_13_13_13_13_11_11_10_9_9_9_10_11_12_12_12_12_12_;AO=9;VT=X	GT:DP:RO:AO	0/1:34:25:9	0/0:8:8:0	0/0:27:27:0	HET
II	13200475	X-DeNovo	C	T	100	PASS	PH=PHASED-66-N2_SV_trim_bwaMEM_sort_modif.bam;FEX=PASS;FS=25/25;RN=NODE_CB3475_trim_bwaMEM_sort_modif.bam.generator.V2_1112_L450_D10:4:2::MH0;MQ=60;cigar=450M;SB=0.666667;AS=2-1;CVT=X;HD=11_12_12_13_13_13_13_13_13_13_14_14_14_14_14_14_14_14_14_15_15_14_13_14_14_;AO=11;VT=X	GT:DP:RO:AO	1/1:11:0:11	0/0:11:11:0	0/0:27:27:0	HOM
II	13448195	D-DeNovo	AT	A	92.3077	PASS	PH=PHASED-50-N2_SV_trim_bwaMEM_sort_modif.bam;FEX=PASS;FS=12/13;RN=NODE_CB3475_trim_bwaMEM_sort_modif.bam.generator.V2_1143_L546_D20:6:3::MH0;MQ=60;cigar=271M1D275M;SB=0.666667;AS=2-3;CVT=D;HD=-1_-1_-1_-1_-1_-1_-1_-1_-1_-1_-1_-1_22_24_23_25_25_26_26_27_27_27_27_28_-1_-1_;AO=22;VT=D	GT:DP:RO:AO	1/1:22:0:22	0/0:6:6:0	0/0:16:16:0	HOM
III	121823	X-Mosaic	C	T	100	.	PH=PHASED-150-N2_SV_trim_bwaMEM_sort_modif.bam;FEX=PASS;FS=25/25;RN=NODE_CB3475_trim_bwaMEM_sort_modif.bam.generator.V2_1279_L499_D13:4:2::MH0;MQ=60;cigar=499M;SB=0.666667;AS=2-1;CVT=X;HD=14_15_15_15_15_14_14_14_14_14_14_15_15_15_15_14_16_16_16_16_16_16_16_16_16_;AO=14;VT=X	GT:DP:RO:AO	0/0:102:88:14	0/0:9:9:0	0/0:35:35:0	REF
III	157822	X-DeNovo	C	T	100	PASS	PH=PHASED-58-N2_SV_trim_bwaMEM_sort_modif.bam;FEX=PASS;FS=25/25;RN=NODE_CB3475_trim_bwaMEM_sort_modif.bam.generator.V2_1283_L389_D12:1:6::MH0;MQ=60;cigar=389M;SB=0.142857;AS=2-1;CVT=X;HD=14_15_15_15_15_15_15_15_15_15_14_14_14_14_14_14_13_13_13_13_13_13_13_13_12_;AO=12;VT=X	GT:DP:RO:AO	1/1:12:0:12	0/0:15:15:0	0/0:29:29:0	HOM
III	465699	X-DeNovo	C	T	100	PASS	PH=PHASED-25-N2_SV_trim_bwaMEM_sort_modif.bam;FEX=PASS;FS=25/25;RN=NODE_CB3475_trim_bwaMEM_sort_modif.bam.generator.V2_1292_L681_D11:4:5::MH0;MQ=60;cigar=681M;SB=0.444444;AS=2-1;CVT=X;HD=13_13_13_13_13_13_13_13_13_12_12_11_10_10_9_9_9_9_9_8_9_9_8_8_8_;AO=8;VT=X	GT:DP:RO:AO	1/1:8:0:8	0/0:10:10:0	0/0:27:27:0	HOM
III	653665	X-DeNovo	C	T	100	PASS	PH=PHASED-24-N2_SV_trim_bwaMEM_sort_modif.bam;FEX=PASS;FS=25/25;RN=NODE_CB3475_trim_bwaMEM_sort_modif.bam.generator.V2_1296_L545_D20:6:3::MH0;MQ=60;cigar=545M;SB=0.666667;AS=2-1;CVT=X;HD=22_22_23_23_23_23_22_22_22_22_22_22_21_21_21_21_21_21_21_21_21_21_21_22_23_;AO=21;VT=X	GT:DP:RO:AO	1/1:21:0:21	0/0:10:10:0	0/0:52:52:0	HOM
III	830684	X-DeNovo	C	T	100	PASS	PH=PHASED-69-N2_SV_trim_bwaMEM_sort_modif.bam;FEX=PASS;FS=25/25;RN=NODE_CB3475_trim_bwaMEM_sort_modif.bam.generator.V2_1302_L535_D18:3:5::MH0;MQ=60;cigar=535M;SB=0.375;AS=2-1;CVT=X;HD=20_20_20_20_20_21_21_21_20_21_21_21_21_21_21_21_22_22_22_22_22_22_22_22_22_;AO=20;VT=X	GT:DP:RO:AO	0/1:38:18:20	0/0:11:11:0	0/0:36:36:0	HET
III	969717	X-DeNovo	C	T	100	PASS	PH=PHASED-399-N2_SV_trim_bwaMEM_sort_modif.bam;FEX=PASS;FS=25/25;RN=NODE_CB3475_trim_bwaMEM_sort_modif.bam.generator.V2_1312_L470_D14:4:6::MH0;MQ=60;cigar=470M;SB=0.4;AS=2-1;CVT=X;HD=16_16_15_14_14_14_14_15_15_15_15_15_14_14_14_13_13_13_13_12_12_12_12_12_12_;AO=12;VT=X	GT:DP:RO:AO	1/1:12:0:12	0/0:8:8:0	.:0:0:0	HOM
III	988010	X-DeNovo	C	T	100	PASS	PH=PHASED-157-N2_SV_trim_bwaMEM_sort_modif.bam;FEX=PASS;FS=25/25;RN=NODE_CB3475_trim_bwaMEM_sort_modif.bam.generator.V2_1313_L510_D18:6:4::MH0;MQ=60;cigar=510M;SB=0.6;AS=2-1;CVT=X;HD=19_19_19_18_18_19_19_19_19_19_19_19_23_23_23_23_23_23_22_22_22_22_22_23_22_;AO=18;VT=X	GT:DP:RO:AO	1/1:18:0:18	0/0:9:9:0	0/0:21:21:0	HOM
III	1059958	X-DeNovo	C	T	100	PASS	PH=none;FEX=PASS;FS=25/25;RN=NODE_CB3475_trim_bwaMEM_sort_modif.bam.generator.V2_1326_L415_D13:3:4::MH0;MQ=60;cigar=415M;SB=0.428571;AS=2-1;CVT=X;HD=19_18_18_18_18_18_18_18_18_18_17_16_16_16_15_14_15_15_15_15_15_15_14_13_13_;AO=13;VT=X	GT:DP:RO:AO	1/1:13:0:13	0/0:9:9:0	0/0:39:39:0	HOM
III	1433311	X-DeNovo	T	A	100	PASS	PH=none;FEX=PASS;FS=25/25;RN=NODE_CB3475_trim_bwaMEM_sort_modif.bam.generator.V2_1357_L281_D15:5:4::MH0;MQ=60;cigar=281M;SB=0.555556;AS=2-1;CVT=X;HD=17_20_20_19_18_18_19_19_18_18_18_18_18_18_18_18_18_18_18_18_18_18_18_18_18_;AO=17;VT=X	GT:DP:RO:AO	1/1:17:0:17	0/0:14:14:0	0/0:46:46:0	HOM
III	1545133	X-DeNovo	C	T	100	PASS	PH=none;FEX=PASS;FS=25/25;RN=NODE_CB3475_trim_bwaMEM_sort_modif.bam.generator.V2_1368_L385_D14:6:5::MH0;MQ=60;cigar=385M;SB=0.545455;AS=2-1;CVT=X;HD=13_13_13_14_14_14_14_14_14_14_13_13_13_13_14_14_14_14_16_16_16_15_15_15_14_;AO=13;VT=X	GT:DP:RO:AO	0/1:41:28:13	0/0:11:11:0	0/0:71:71:0	HET
III	1651518	X-DeNovo	G	A	100	PASS	PH=none;FEX=PASS;FS=25/25;RN=NODE_CB3475_trim_bwaMEM_sort_modif.bam.generator.V2_1381_L546_D16:4:4::MH0;MQ=60;cigar=546M;SB=0.5;AS=5-1;CVT=X;HD=27_27_27_27_27_25_25_25_25_25_25_25_25_25_26_26_26_26_26_26_26_26_25_25_25_;AO=25;VT=X	GT:DP:RO:AO	0/1:58:33:25	0/0:13:13:0	0/0:2:2:0	HET
III	1705339	X-DeNovo	G	A	100	PASS	PH=PHASED-23-N2_SV_trim_bwaMEM_sort_modif.bam;FEX=PASS;FS=25/25;RN=NODE_CB3475_trim_bwaMEM_sort_modif.bam.generator.V2_1384_L647_D15:9:2::MH0;MQ=60;cigar=647M;SB=0.818182;AS=2-1;CVT=X;HD=14_14_14_15_15_15_15_15_16_16_15_15_15_15_14_15_15_15_15_15_15_15_15_15_15_;AO=14;VT=X	GT:DP:RO:AO	1/1:14:0:14	0/0:11:11:0	0/0:25:25:0	HOM
III	1769149	X-DeNovo	G	T	84	PASS	PH=PHASED-5-N2_SV_trim_bwaMEM_sort_modif.bam;FEX=PASS;FS=21/25;RN=NODE_CB3475_trim_bwaMEM_sort_modif.bam.generator.V2_1389_L269_D5:2:1::MH0;MQ=60;cigar=269M;SB=0.666667;AS=2-1;CVT=X;HD=7_7_7_7_7_7_7_7_7_7_7_7_7_7_7_7_7_7_7_7_7_-1_-1_-1_-1_;AO=7;VT=X	GT:DP:RO:AO	1/1:7:0:7	0/0:9:9:0	0/0:29:29:0	HOM
III	1977724	X-DeNovo	G	A	100	PASS	PH=PHASED-37-N2_SV_trim_bwaMEM_sort_modif.bam;FEX=PASS;FS=25/25;RN=NODE_CB3475_trim_bwaMEM_sort_modif.bam.generator.V2_1429_L632_D26:5:8::MH0;MQ=60;cigar=632M;SB=0.384615;AS=2-1;CVT=X;HD=31_30_30_30_30_30_31_31_31_30_30_30_30_30_30_30_30_29_28_28_28_29_28_28_28_;AO=28;VT=X	GT:DP:RO:AO	1/1:28:0:28	0/0:8:8:0	0/0:25:25:0	HOM
III	2003804	X-DeNovo	A	T	100	PASS	PH=PHASED-31-N2_SV_trim_bwaMEM_sort_modif.bam;FEX=PASS;FS=25/25;RN=NODE_CB3475_trim_bwaMEM_sort_modif.bam.generator.V2_1435_L291_D7:2:3::MH0;MQ=60;cigar=291M;SB=0.4;AS=2-1;CVT=X;HD=7_7_7_7_7_8_8_9_9_9_9_9_9_9_9_9_9_9_9_9_9_9_9_9_9_;AO=7;VT=X	GT:DP:RO:AO	0/1:22:15:7	0/0:9:9:0	.:0:0:0	HET
III	2244730	X-DeNovo	G	A	100	PASS	PH=none;FEX=PASS;FS=25/25;RN=NODE_CB3475_trim_bwaMEM_sort_modif.bam.generator.V2_1444_L466_D21:4:4::MH0;MQ=60;cigar=466M;SB=0.5;AS=2-1;CVT=X;HD=20_20_20_20_19_20_20_22_22_22_22_22_22_22_22_24_24_24_24_24_24_24_24_24_24_;AO=19;VT=X	GT:DP:RO:AO	1/1:19:0:19	0/0:10:10:0	0/0:31:31:0	HOM
III	2293000	X-DeNovo	G	A	88	PASS	PH=none;FEX=PASS;FS=22/25;RN=NODE_CB3475_trim_bwaMEM_sort_modif.bam.generator.V2_1445_L330_D10:1:4::MH0;MQ=60;cigar=330M;SB=0.2;AS=2-1;CVT=X;HD=-1_-1_9_9_9_8_9_10_10_11_12_12_12_12_12_-1_12_12_12_12_13_13_13_13_13_;AO=8;VT=X	GT:DP:RO:AO	0/1:19:11:8	0/0:10:10:0	0/0:32:32:0	HET
III	2740529	X-DeNovo	G	A	100	PASS	PH=PHASED-9-N2_SV_trim_bwaMEM_sort_modif.bam;FEX=PASS;FS=25/25;RN=NODE_CB3475_trim_bwaMEM_sort_modif.bam.generator.V2_1479_L407_D8:3:2::MH0;MQ=60;cigar=407M;SB=0.6;AS=2-1;CVT=X;HD=13_13_13_13_13_13_13_13_14_14_14_14_14_13_13_12_12_12_12_12_12_11_10_11_11_;AO=10;VT=X	GT:DP:RO:AO	0/1:26:16:10	0/0:9:9:0	0/0:32:32:0	HET
III	3582108	D-DeNovo	AT	A	75	PASS	PH=PHASED-5-N2_SV_trim_bwaMEM_sort_modif.bam;FEX=PASS;FS=12/16;RN=NODE_CB3475_trim_bwaMEM_sort_modif.bam.generator.V2_1514_L472_D11:7:1::MH0;MQ=60;cigar=176M1D296M;SB=0.875;AS=2-3;CVT=D;HD=-1_-1_-1_-1_-1_-1_-1_-1_-1_-1_10_10_10_11_12_13_-1_13_-1_13_13_13_12_13_-1_-1_;AO=10;VT=D	GT:DP:RO:AO	0/1:21:11:10	0/0:15:15:0	0/0:32:32:0	HET
III	9592659	X-DeNovo	A	T	100	PASS	PH=none;FEX=PASS;FS=25/25;RN=NODE_CB3475_trim_bwaMEM_sort_modif.bam.generator.V2_1560_L458_D10:3:2::MH0;MQ=60;cigar=458M;SB=0.6;AS=2-1;CVT=X;HD=8_9_9_9_8_8_8_8_8_8_8_8_9_10_10_10_10_9_9_9_9_9_9_9_9_;AO=8;VT=X	GT:DP:RO:AO	1/1:8:0:8	0/0:11:11:0	0/0:32:32:0	HOM
III	12641313	444D-DeNovo	ATTCTACGTATATGAATTACCCGTTTTCAACAAATTTAGGCAACTTTTTATTTTTGCCCATTTTAATTTTTCAGCCATTTTTCAGCCACTGTCCTTTTTTTTGGGCAAAAAAATAATTTTTCTAAAAATGTACAAAACCGCTATATTCTTAAAAAGGGCATTTTTTAAGTGTCCAGAGATCAATTTTGAGTCCTCTAACTACAAAATTGCCTTTTTTAGAGGAGTTTCAAGATTGTGATTTTTTGCCATAAATTGTCCATTTTTGCCACTTTCTAATAGTTTTTGATGGGTTAAACCTAGATTTTCTGAATTCAGCATACACGAATTACCTGTTTTCAACAAATTTAGGCAACTTTTTATTTTTGCCCATTTACATTTTTCAGCCATTTTTCAGCCATA…	A	56	PASS	PH=none;FEX=PASS;FS=14/25;RN=NODE_CB3475_trim_bwaMEM_sort_modif.bam.generator.V2_1680_L299_D12:4:3::MH0;MQ=60;cigar=123M176S;SB=0.571429;AS=1-2;CVT=444D;HD=13_12_13_13_13_13_14_14_15_15_17_17_18_19_-1_-1_-1_-1_-1_-1_-1_-1_-1_-1_-1_-1_-1_-1_-1_-1_-1_-1_-1_-1_-1_-1_-1_-1_-1_-1_-1_-1_-1_-1_-1_-1_-1_-1_-1_-1_-1_-1_-1_-1_-1_-1_-1_-1_-1_-1_-1_-1_-1_-1_-1_-1_-1_-1_-1_-1_-1_-1_-1_-1_-1_-1_-1_-1_-1_-1_-1_…	GT:DP:RO:AO	0/1:24:12:12	0/0:2:2:0	0/0:25:25:0	HET
IV	1026952	X-DeNovo	G	A	80	PASS	PH=none;FEX=PASS;FS=20/25;RN=NODE_CB3475_trim_bwaMEM_sort_modif.bam.generator.V2_1733_L617_D11:4:4::MH0;MQ=60;cigar=617M;SB=0.5;AS=2-1;CVT=X;HD=12_11_11_-1_-1_-1_11_11_11_11_11_12_12_12_12_13_13_14_14_14_14_14_13_-1_-1_;AO=11;VT=X	GT:DP:RO:AO	0/1:43:32:11	0/0:12:12:0	0/0:31:31:0	HET
IV	1145940	X-DeNovo	G	A	100	PASS	PH=PHASED-1-Havaiian_SV_trim_bwaMEM_sort_modif.bam;FEX=PASS;FS=25/25;RN=NODE_CB3475_trim_bwaMEM_sort_modif.bam.generator.V2_1741_L507_D14:1:4::MH0;MQ=60;cigar=507M;SB=0.2;AS=2-1;CVT=X;HD=18_18_18_19_19_19_19_19_19_19_19_19_19_19_19_19_19_19_19_19_19_19_20_20_21_;AO=18;VT=X	GT:DP:RO:AO	1/1:18:0:18	0/0:12:12:0	0/0:22:22:0	HOM
IV	1187952	X-DeNovo	G	A	100	PASS	PH=none;FEX=PASS;FS=25/25;RN=NODE_CB3475_trim_bwaMEM_sort_modif.bam.generator.V2_1743_L307_D12:3:4::MH0;MQ=60;cigar=307M;SB=0.428571;AS=2-1;CVT=X;HD=19_19_19_19_18_18_18_18_18_18_18_18_18_18_18_14_14_14_15_15_14_14_14_14_14_;AO=14;VT=X	GT:DP:RO:AO	1/1:14:0:14	0/0:8:8:0	0/0:31:31:0	HOM
IV	1337391	X-DeNovo	G	A	100	PASS	PH=PHASED-75-N2_SV_trim_bwaMEM_sort_modif.bam;FEX=PASS;FS=25/25;RN=NODE_CB3475_trim_bwaMEM_sort_modif.bam.generator.V2_1749_L586_D14:5:6::MH0;MQ=60;cigar=586M;SB=0.454545;AS=2-1;CVT=X;HD=18_18_17_17_17_17_16_16_16_16_16_16_16_16_16_16_15_15_15_14_14_14_14_14_13_;AO=13;VT=X	GT:DP:RO:AO	0/1:26:13:13	0/0:12:12:0	0/0:38:38:0	HET
IV	1548848	X-DeNovo	G	A	100	PASS	PH=none;FEX=PASS;FS=25/25;RN=NODE_CB3475_trim_bwaMEM_sort_modif.bam.generator.V2_1768_L467_D20:3:7::MH0;MQ=60;cigar=467M;SB=0.3;AS=2-1;CVT=X;HD=19_18_18_18_18_18_19_21_23_23_23_23_24_23_23_23_23_23_24_24_24_24_24_24_24_;AO=18;VT=X	GT:DP:RO:AO	1/1:18:0:18	0/0:8:8:0	0/0:29:29:0	HOM
IV	2147420	X-DeNovo	G	A	92	PASS	PH=none;FEX=PASS;FS=23/25;RN=NODE_CB3475_trim_bwaMEM_sort_modif.bam.generator.V2_1800_L425_D18:3:5::MH0;MQ=60;cigar=425M;SB=0.375;AS=2-1;CVT=X;HD=26_27_27_25_25_23_24_24_24_24_24_24_23_23_24_24_24_24_24_24_24_24_23_-1_-1_;AO=23;VT=X	GT:DP:RO:AO	0/1:33:10:23	0/0:8:8:0	0/0:39:39:0	HET
IV	2657040	XX-DeNovo	GA	TC	100	PASS	PH=PHASED-60-N2_SV_trim_bwaMEM_sort_modif.bam;FEX=PASS;FS=26/26;RN=NODE_CB3475_trim_bwaMEM_sort_modif.bam.generator.V2_1843_L337_D14:6:2::MH0;MQ=60;cigar=333M4S;SB=0.75;AS=2-2;CVT=XX;HD=17_17_17_16_15_16_15_15_15_15_15_15_16_15_15_17_17_17_18_17_17_18_18_18_18_18_-1_;AO=15;VT=XX	GT:DP:RO:AO	1/1:15:0:15	0/0:9:9:0	0/0:23:23:0	HOM
IV	6151014	8DX-DeNovo	CAACTCTATA	CT	96.1538	PASS	PH=none;FEX=PASS;FS=25/26;RN=NODE_CB3475_trim_bwaMEM_sort_modif.bam.generator.V2_1933_L412_D12:1:6::MH0;MQ=60;cigar=252M8D160M;SB=0.142857;AS=2-3;CVT=8DX;HD=15_15_15_15_16_15_15_15_14_14_14_14_13_13_13_13_13_13_13_13_13_13_13_13_-1_-1_-1_-1_-1_-1_-1_-1_13_-1_-1_;AO=13;VT=DDDDDDDDX	GT:DP:RO:AO	1/1:13:0:13	0/0:10:10:0	0/0:36:36:0	HOM
IV	8440268	X-DeNovo	C	T	100	PASS	PH=PHASED-25-N2_SV_trim_bwaMEM_sort_modif.bam;FEX=PASS;FS=25/25;RN=NODE_CB3475_trim_bwaMEM_sort_modif.bam.generator.V2_1958_L702_D18:5:4::MH0;MQ=60;cigar=702M;SB=0.555556;AS=2-1;CVT=X;HD=26_26_26_25_25_25_25_25_25_26_26_26_26_25_25_25_24_24_24_24_24_26_26_24_24_;AO=24;VT=X	GT:DP:RO:AO	1/1:24:0:24	0/0:18:18:0	0/0:31:31:0	HOM
IV	8673581	X-DeNovo	A	T	4	PASS	PH=none;FEX=PASS;FS=1/25;RN=NODE_CB3475_trim_bwaMEM_sort_modif.bam.generator.V2_1961_L298_D7:1:3::MH0;MQ=60;cigar=298M;SB=0.25;AS=2-1;CVT=X;HD=13_-1_-1_-1_-1_-1_-1_-1_-1_-1_-1_-1_-1_-1_-1_-1_-1_-1_-1_-1_-1_-1_-1_-1_-1_;AO=13;VT=X	GT:DP:RO:AO	1/1:13:0:13	0/0:14:14:0	.:0:0:0	HOM
IV	11260812	X-DeNovo	C	A	100	PASS	PH=PHASED-25-N2_SV_trim_bwaMEM_sort_modif.bam;FEX=PASS;FS=25/25;RN=NODE_CB3475_trim_bwaMEM_sort_modif.bam.generator.V2_1970_L604_D19:8:3::MH0;MQ=60;cigar=604M;SB=0.727273;AS=2-1;CVT=X;HD=20_20_20_20_20_20_20_20_19_19_19_19_20_20_20_20_20_22_21_22_22_22_22_24_24_;AO=19;VT=X	GT:DP:RO:AO	1/1:19:0:19	0/0:10:10:0	0/0:45:45:0	HOM
IV	15563795	X-DeNovo	G	A	100	PASS	PH=PHASED-16-N2_SV_trim_bwaMEM_sort_modif.bam;FEX=PASS;FS=25/25;RN=NODE_CB3475_trim_bwaMEM_sort_modif.bam.generator.V2_2065_L477_D21:4:6::MH0;MQ=60;cigar=477M;SB=0.4;AS=2-1;CVT=X;HD=24_25_24_24_25_25_25_25_26_26_26_26_26_26_26_26_26_26_27_27_28_28_29_29_29_;AO=24;VT=X	GT:DP:RO:AO	1/1:24:0:24	0/0:10:10:0	0/0:37:37:0	HOM
IV	15568363	X-DeNovo	G	A	100	PASS	PH=PHASED-50-N2_SV_trim_bwaMEM_sort_modif.bam;FEX=PASS;FS=25/25;RN=NODE_CB3475_trim_bwaMEM_sort_modif.bam.generator.V2_2067_L530_D20:6:5::MH0;MQ=60;cigar=530M;SB=0.545455;AS=2-1;CVT=X;HD=26_26_26_26_26_24_24_22_22_21_21_21_21_21_21_21_21_21_21_21_22_22_22_22_23_;AO=21;VT=X	GT:DP:RO:AO	1/1:21:0:21	0/0:8:8:0	0/0:36:36:0	HOM
IV	15785167	X-DeNovo	G	A	100	PASS	PH=PHASED-80-N2_SV_trim_bwaMEM_sort_modif.bam;FEX=PASS;FS=25/25;RN=NODE_CB3475_trim_bwaMEM_sort_modif.bam.generator.V2_2069_L480_D8:3:2::MH0;MQ=60;cigar=480M;SB=0.6;AS=2-1;CVT=X;HD=13_13_13_13_12_12_12_12_12_12_12_12_12_12_13_13_13_13_13_13_13_13_12_13_13_;AO=12;VT=X	GT:DP:RO:AO	0/1:49:37:12	0/0:31:31:0	0/0:77:77:0	HET
IV	15905251	38I669D-DeNovo	TCCAGTAACGTCAACACATAACTGAAAATTTTTCAAAAACGATTACAAGTTTTTGCATTTACGTACTGACTTCCAATACTAAACCAAAAAATTTTGGGAAAATAAAAATTTTCCGAGAAAAGTCGGTTTCATGTTGTTTTTAAAATCTGAAAAAATGAGGTTTCAATCGTTTCAGCGATCGAAAGACAACAAAACTATAAGGAAAAATGCTGTTTTAGATTGTTTTCAAACTCCAAATTAATACAGATTTTTGATGTATTTTTCAAAAACTGCGAATCAAATATTATTTACCTTCGAAAATACATGTATTTCACAAGAATGAATCATATTTTTTAATTTTGAATAATTTATAACAAAGAATTTTTTTTACCTTTTATATAAACGTTGAAATAGTTTTTT…	TTTTTTTTTTTTTTTTTTTTTTTATATTAGTTTTTTATT	79.0323	PASS	PH=none;FEX=PASS;FS=49/62;RN=NODE_CB3475_trim_bwaMEM_sort_modif.bam.generator.V2_2074_L198_D8:1:3::MH0;MQ=60;cigar=33M165S;SB=0.25;AS=1-2;CVT=38I669D;HD=8_8_8_8_8_8_8_8_8_9_9_9_9_8_8_-1_-1_-1_-1_-1_-1_-1_-1_-1_-1_-1_-1_-1_7_7_7_7_7_7_7_7_7_7_8_8_8_8_8_8_8_8_8_8_8_8_8_8_9_9_9_9_10_12_12_12_12_12_-1_-1_-1_-1_-1_-1_-1_-1_-1_-1_-1_-1_-1_-1_-1_-1_-1_-1_-1_-1_-1_-1_-1_-1_-1_-1_-1_-1_-1_-1_-1_-1_-1_-1_-…	GT:DP:RO:AO	1/1:7:0:7	0/0:5:5:0	0/0:22:22:0	HOM
IV	15906388	OrphanBND-LC=0bnd_9-DeNovo	G	G]chr4:15911443]	96	PASS	SVTYPE=BND;MATEID=bnd_10;PH=PHASED-39-N2_SV_trim_bwaMEM_sort_modif.bam;FEX=Pass;FS=24/25;RN=NODE_CB3475_trim_bwaMEM_sort_modif.bam.generator.V2_2078_L677_D12:7:3::MH0;MQ=60_and_60;cigar=346M331S_and_331M346S;SB=0.7;AS=1-2_and_	GT:DP:RO:AO	1/1:9:0:9	0/0:6:6:0	0/0:38:38:0	HOM
IV	15908017	OrphanBND-LC=0bnd_15-DeNovo	A	[chr4:15908481[A	100	PASS	SVTYPE=BND;MATEID=bnd_16;PH=PHASED-25-N2_SV_trim_bwaMEM_sort_modif.bam;FEX=Pass;FS=24/24;RN=NODE_CB3475_trim_bwaMEM_sort_modif.bam.generator.V2_2076_L386_D11:3:2::MH0;MQ=60_and_60;cigar=277S109M_and_109S277M;SB=0.6;AS=1-2_and_	GT:DP:RO:AO	1/1:13:0:13	0/0:12:12:0	0/0:24:24:0	HOM
IV	15908481	OrphanBND-LC=0bnd_13-DeNovo	C	[chr4:15908017[C	100	PASS	SVTYPE=BND;MATEID=bnd_14;PH=none;FEX=Pass;FS=24/24;RN=NODE_CB3475_trim_bwaMEM_sort_modif.bam.generator.V2_2076_L386_D11:3:2::MH0;MQ=60_and_60;cigar=109S277M_and_277S109M;SB=0.6;AS=1-2_and_	GT:DP:RO:AO	0/1:25:12:13	0/0:6:6:0	0/0:31:31:0	HET
IV	15911443	OrphanBND-LC=0bnd_11-DeNovo	G	T]chr4:15906388]	96	PASS	SVTYPE=BND;MATEID=bnd_12;PH=none;FEX=Pass;FS=24/25;RN=NODE_CB3475_trim_bwaMEM_sort_modif.bam.generator.V2_2078_L677_D12:7:3::MH0;MQ=60_and_60;cigar=331M346S_and_346M331S;SB=0.7;AS=1-2_and_	GT:DP:RO:AO	0/1:18:9:9	0/0:11:11:0	0/0:31:31:0	HET
IV	16120913	X-DeNovo	G	A	100	PASS	PH=PHASED-25-N2_SV_trim_bwaMEM_sort_modif.bam;FEX=PASS;FS=25/25;RN=NODE_CB3475_trim_bwaMEM_sort_modif.bam.generator.V2_2085_L657_D19:7:9::MH0;MQ=60;cigar=657M;SB=0.4375;AS=2-1;CVT=X;HD=20_20_20_20_19_19_19_19_19_19_19_19_18_18_19_19_19_19_19_18_18_18_16_16_16_;AO=16;VT=X	GT:DP:RO:AO	1/1:16:0:16	0/0:12:12:0	0/0:40:40:0	HOM
V	486968	19735Y-DeNovo	G	<DUP>	95.8333	PASS	SVTYPE=DUP;END=506704;SVLEN=19735;PH=none;FEX=Pass;FS=23/24;RN=NODE_CB3475_trim_bwaMEM_sort_modif.bam.generator.V2_2148_L673_D15:3:7::MH0;MQ=60_and_60;cigar=387S286M_and_387M286S;SB=0.3;AS=1-2_and_1-2	GT:DP:RO:AO	0/1:26:12:14	0/0:2:2:0	0/0:37:37:0	HET
V	492788	X-DeNovo	A	T	104	PASS	PH=PHASED-25-N2_SV_trim_bwaMEM_sort_modif.bam;FEX=PASS;FS=26/25;RN=NODE_CB3475_trim_bwaMEM_sort_modif.bam.generator.V2_2145_L461_D21:4:9::MH0;MQ=60;cigar=210M251S;SB=0.307692;AS=2-2;CVT=X;HD=21_21_21_22_22_23_23_23_22_23_23_23_23_23_23_23_23_25_25_26_25_24_24_24_24_;AO=21;VT=X	GT:DP:RO:AO	0/1:41:20:21	0/0:9:9:0	0/0:30:30:0	HET
V	492796	OrphanBND-LC=0bnd_17-DeNovo	T	TCCAT]chr5:493710]	100	PASS	SVTYPE=BND;MATEID=bnd_18;PH=PHASED-25-N2_SV_trim_bwaMEM_sort_modif.bam;FEX=Pass;FS=25/25;RN=NODE_CB3475_trim_bwaMEM_sort_modif.bam.generator.V2_2145_L461_D21:4:9::MH0;MQ=60_and_60;cigar=210M251S_and_247M214S;SB=0.307692;AS=2-2_and_	GT:DP:RO:AO	0/0:19:19:0	0/0:11:11:0	0/0:27:27:0	HET
V	493710	OrphanBND-LC=0bnd_19-DeNovo	A	TATGG]chr5:492796]	100	PASS	SVTYPE=BND;MATEID=bnd_20;PH=none;FEX=Pass;FS=25/25;RN=NODE_CB3475_trim_bwaMEM_sort_modif.bam.generator.V2_2145_L461_D21:4:9::MH0;MQ=60_and_60;cigar=247M214S_and_210M251S;SB=0.307692;AS=1-2_and_	GT:DP:RO:AO	1/1:23:0:23	0/0:15:15:0	0/0:31:31:0	HOM
V	498904	OrphanBND-LC=0bnd_23-DeNovo	T	[chr5:499418[T	95.8333	PASS	SVTYPE=BND;MATEID=bnd_24;PH=none;FEX=Pass;FS=23/24;RN=NODE_CB3475_trim_bwaMEM_sort_modif.bam.generator.V2_2146_L353_D9:3:1::MH0;MQ=60_and_60;cigar=196S157M_and_156S197M;SB=0.75;AS=1-2_and_	GT:DP:RO:AO	1/1:11:0:11	0/0:10:10:0	0/0:39:39:0	HOM
V	499418	OrphanBND-LC=0bnd_21-DeNovo	A	[chr5:498904[A	95.8333	PASS	SVTYPE=BND;MATEID=bnd_22;PH=none;FEX=Pass;FS=23/24;RN=NODE_CB3475_trim_bwaMEM_sort_modif.bam.generator.V2_2146_L353_D9:3:1::MH0;MQ=60_and_60;cigar=156S197M_and_196S157M;SB=0.75;AS=1-2_and_	GT:DP:RO:AO	0/1:22:11:11	0/0:8:8:0	0/0:20:20:0	HET
V	2824820	X-DeNovo	G	A	100	PASS	PH=PHASED-16-N2_SV_trim_bwaMEM_sort_modif.bam;FEX=PASS;FS=25/25;RN=NODE_CB3475_trim_bwaMEM_sort_modif.bam.generator.V2_2267_L428_D19:7:2::MH0;MQ=60;cigar=428M;SB=0.777778;AS=2-1;CVT=X;HD=20_20_21_22_22_22_22_22_22_22_22_22_22_22_22_22_22_24_24_24_24_24_24_25_25_;AO=20;VT=X	GT:DP:RO:AO	1/1:20:0:20	0/0:9:9:0	0/0:29:29:0	HOM
V	2870687	X-DeNovo	G	A	100	PASS	PH=PHASED-71-N2_SV_trim_bwaMEM_sort_modif.bam;FEX=PASS;FS=25/25;RN=NODE_CB3475_trim_bwaMEM_sort_modif.bam.generator.V2_2269_L693_D15:4:9::MH0;MQ=60;cigar=693M;SB=0.307692;AS=2-1;CVT=X;HD=16_16_16_16_15_15_14_14_14_14_14_14_14_14_14_13_13_13_13_14_14_14_14_14_14_;AO=13;VT=X	GT:DP:RO:AO	1/1:13:0:13	0/0:8:8:0	0/0:32:32:0	HOM
V	2962933	D-DeNovo	TA	T	87.5	PASS	PH=PHASED-34-N2_SV_trim_bwaMEM_sort_modif.bam;FEX=PASS;FS=7/8;RN=NODE_CB3475_trim_bwaMEM_sort_modif.bam.generator.V2_2273_L334_D8:3:3::MH0;MQ=60;cigar=146M1D188M;SB=0.5;AS=2-3;CVT=D;HD=-1_-1_-1_-1_-1_-1_-1_-1_-1_-1_-1_-1_-1_-1_-1_-1_-1_14_14_14_14_14_14_14_-1_-1_;AO=14;VT=D	GT:DP:RO:AO	1/1:14:0:14	0/0:13:13:0	.:0:0:0	HOM
V	3070271	D-DeNovo	GT	G	93.3333	PASS	PH=PHASED-35-N2_SV_trim_bwaMEM_sort_modif.bam;FEX=PASS;FS=14/15;RN=NODE_CB3475_trim_bwaMEM_sort_modif.bam.generator.V2_2279_L468_D8:1:2::MH0;MQ=60;cigar=270M1D198M;SB=0.333333;AS=2-3;CVT=D;HD=-1_-1_-1_-1_-1_-1_-1_-1_-1_-1_10_9_9_9_9_9_9_9_10_10_10_10_10_11_-1_-1_;AO=9;VT=D	GT:DP:RO:AO	1/1:9:0:9	0/0:9:9:0	.:0:0:0	HOM
V	3148184	D-DeNovo	GT	G	93.75	PASS	PH=PHASED-35-N2_SV_trim_bwaMEM_sort_modif.bam;FEX=PASS;FS=15/16;RN=NODE_CB3475_trim_bwaMEM_sort_modif.bam.generator.V2_2282_L507_D15:7:2::MH0;MQ=60;cigar=191M1D316M;SB=0.777778;AS=2-3;CVT=D;HD=-1_-1_-1_-1_-1_-1_-1_-1_-1_18_18_18_18_17_17_18_17_18_18_18_18_18_18_19_-1_-1_;AO=17;VT=D	GT:DP:RO:AO	1/1:17:0:17	0/0:7:7:0	.:0:0:0	HOM
V	3187633	D-DeNovo	TA	T	57.8947	PASS	PH=none;FEX=PASS;FS=11/19;RN=NODE_CB3475_trim_bwaMEM_sort_modif.bam.generator.V2_2285_L535_D10:5:1::MH0;MQ=60;cigar=207M1D328M;SB=0.833333;AS=2-3;CVT=D;HD=-1_-1_-1_-1_-1_-1_13_12_12_-1_11_-1_-1_-1_-1_-1_-1_11_11_11_11_11_10_10_-1_-1_;AO=10;VT=D	GT:DP:RO:AO	0/1:12:2:10	0/0:11:11:0	0/0:31:31:0	HET
V	3318226	X-DeNovo	G	A	100	PASS	PH=PHASED-40-N2_SV_trim_bwaMEM_sort_modif.bam;FEX=PASS;FS=25/25;RN=NODE_CB3475_trim_bwaMEM_sort_modif.bam.generator.V2_2290_L579_D17:4:3::MH0;MQ=60;cigar=579M;SB=0.571429;AS=2-1;CVT=X;HD=19_21_21_21_21_21_21_22_22_23_22_22_21_20_20_20_20_20_20_20_20_21_22_22_23_;AO=19;VT=X	GT:DP:RO:AO	1/1:19:0:19	0/0:9:9:0	0/0:31:31:0	HOM
V	3352188	X-DeNovo	C	T	100	PASS	PH=PHASED-341-N2_SV_trim_bwaMEM_sort_modif.bam;FEX=PASS;FS=25/25;RN=NODE_CB3475_trim_bwaMEM_sort_modif.bam.generator.V2_2293_L453_D17:4:7::MH0;MQ=60;cigar=453M;SB=0.363636;AS=2-1;CVT=X;HD=17_17_17_18_18_18_18_18_18_20_18_18_19_19_20_19_19_18_18_19_19_19_20_20_20_;AO=17;VT=X	GT:DP:RO:AO	1/1:17:0:17	0/0:9:9:0	.:0:0:0	HOM
V	3428789	D-DeNovo	AT	A	92.3077	PASS	PH=PHASED-417-N2_SV_trim_bwaMEM_sort_modif.bam;FEX=PASS;FS=12/13;RN=NODE_CB3475_trim_bwaMEM_sort_modif.bam.generator.V2_2310_L458_D11:3:3::MH0;MQ=60;cigar=148M1D310M;SB=0.5;AS=2-3;CVT=D;HD=-1_-1_-1_-1_-1_-1_-1_-1_-1_-1_-1_-1_12_12_13_13_14_13_13_14_14_14_14_16_-1_-1_;AO=12;VT=D	GT:DP:RO:AO	1/1:14:2:12	0/0:11:11:0	.:0:0:0	HOM
V	3487497	D-DeNovo	AT	A	94.4444	PASS	PH=PHASED-86-N2_SV_trim_bwaMEM_sort_modif.bam;FEX=PASS;FS=17/18;RN=NODE_CB3475_trim_bwaMEM_sort_modif.bam.generator.V2_2317_L551_D21:6:5::MH0;MQ=60;cigar=205M1D346M;SB=0.545455;AS=2-3;CVT=D;HD=-1_-1_-1_-1_-1_-1_-1_26_26_26_26_26_26_25_25_27_27_27_28_30_29_29_29_29_-1_-1_;AO=25;VT=D	GT:DP:RO:AO	1/1:25:0:25	0/0:7:7:0	0/0:30:30:0	HOM
V	3561700	D-DeNovo	TA	T	96	PASS	PH=PHASED-99-N2_SV_trim_bwaMEM_sort_modif.bam;FEX=PASS;FS=24/25;RN=NODE_CB3475_trim_bwaMEM_sort_modif.bam.generator.V2_2322_L312_D15:1:5::MH0;MQ=16;cigar=238M1D5M1D69M;SB=0.166667;AS=3-5;CVT=D;HD=12_12_12_12_12_13_13_13_14_14_14_14_14_14_14_14_14_13_-1_13_13_13_13_13_-1_-1_;AO=12;VT=D	GT:DP:RO:AO	0/1:36:24:12	0/0:18:18:0	0/0:59:59:0	HET
V	3643141	X-DeNovo	G	A	100	PASS	PH=PHASED-25-N2_SV_trim_bwaMEM_sort_modif.bam;FEX=PASS;FS=25/25;RN=NODE_CB3475_trim_bwaMEM_sort_modif.bam.generator.V2_2327_L536_D12:3:5::MH0;MQ=60;cigar=536M;SB=0.375;AS=2-1;CVT=X;HD=12_12_12_11_11_11_10_10_10_11_11_11_11_11_11_11_10_10_10_10_11_11_11_11_11_;AO=10;VT=X	GT:DP:RO:AO	1/1:10:0:10	0/0:11:11:0	0/0:22:22:0	HOM
V	3718456	I-DeNovo	G	GA	100	PASS	PH=none;FEX=PASS;FS=16/16;RN=NODE_CB3475_trim_bwaMEM_sort_modif.bam.generator.V2_2334_L413_D14:2:5::MH0;MQ=60;cigar=248M1I164M;SB=0.285714;AS=2-3;CVT=I;HD=-1_-1_-1_-1_-1_-1_-1_-1_-1_17_17_16_15_14_14_15_15_16_16_17_18_18_18_18_18_-1_;AO=14;VT=I	GT:DP:RO:AO	1/1:14:0:14	0/0:8:8:0	0/0:21:21:0	HOM
V	3766819	D-Mosaic	CA	C	87.5	.	PH=PHASED-114-N2_SV_trim_bwaMEM_sort_modif.bam;FEX=PASS;FS=14/16;RN=NODE_CB3475_trim_bwaMEM_sort_modif.bam.generator.V2_2340_L390_D10:4:3::MH0;MQ=60;cigar=296M1D94M;SB=0.571429;AS=2-3;CVT=D;HD=-1_-1_-1_-1_-1_-1_-1_-1_-1_-1_11_11_11_11_11_10_10_10_10_9_9_9_9_9_-1_-1_;AO=9;VT=D	GT:DP:RO:AO	0/0:211:202:9	0/0:13:13:0	0/0:300:300:0	REF
V	3953768	I-DeNovo	C	CA	100	PASS	PH=PHASED-496-N2_SV_trim_bwaMEM_sort_modif.bam;FEX=PASS;FS=17/17;RN=NODE_CB3475_trim_bwaMEM_sort_modif.bam.generator.V2_2356_L566_D13:3:4::MH0;MQ=60;cigar=225M1I340M;SB=0.428571;AS=2-3;CVT=I;HD=-1_-1_-1_-1_-1_-1_-1_-1_16_15_15_14_14_14_14_15_15_15_14_14_14_14_14_14_15_-1_;AO=14;VT=I	GT:DP:RO:AO	1/1:14:0:14	0/0:8:8:0	.:0:0:0	HOM
V	3979219	X-DeNovo	G	A	100	PASS	PH=none;FEX=PASS;FS=25/25;RN=NODE_CB3475_trim_bwaMEM_sort_modif.bam.generator.V2_2358_L439_D12:3:4::MH0;MQ=60;cigar=439M;SB=0.428571;AS=2-1;CVT=X;HD=13_13_13_13_13_14_15_15_16_16_16_16_16_16_16_16_16_16_16_16_16_16_16_16_16_;AO=13;VT=X	GT:DP:RO:AO	1/1:13:0:13	0/0:9:9:0	0/0:39:39:0	HOM
V	4009451	I-DeNovo	G	GA	100	PASS	PH=none;FEX=PASS;FS=16/16;RN=NODE_CB3475_trim_bwaMEM_sort_modif.bam.generator.V2_2359_L766_D17:10:10::MH0;MQ=60;cigar=424M1I341M;SB=0.5;AS=3-3;CVT=I;HD=-1_-1_-1_-1_-1_-1_-1_-1_-1_15_14_16_16_15_15_15_15_15_15_15_15_15_15_16_16_-1_;AO=14;VT=I	GT:DP:RO:AO	0/1:27:13:14	0/0:8:8:0	0/0:20:20:0	HET
V	4034470	X-DeNovo	G	A	100	PASS	PH=none;FEX=PASS;FS=25/25;RN=NODE_CB3475_trim_bwaMEM_sort_modif.bam.generator.V2_2362_L870_D21:14:9::MH0;MQ=60;cigar=584M1D286M;SB=0.608696;AS=3-3;CVT=X;HD=22_22_20_20_20_20_19_19_19_19_20_20_21_21_21_21_20_20_21_21_22_21_21_21_21_;AO=19;VT=X	GT:DP:RO:AO	1/1:19:0:19	0/0:11:11:0	0/0:29:29:0	HOM
V	4075746	X-DeNovo	G	A	100	PASS	PH=PHASED-49-N2_SV_trim_bwaMEM_sort_modif.bam;FEX=PASS;FS=25/25;RN=NODE_CB3475_trim_bwaMEM_sort_modif.bam.generator.V2_2366_L691_D18:7:4::MH0;MQ=60;cigar=691M;SB=0.636364;AS=2-1;CVT=X;HD=22_23_23_23_23_23_23_24_24_26_26_26_25_25_25_26_26_26_26_25_26_25_24_24_24_;AO=22;VT=X	GT:DP:RO:AO	1/1:22:0:22	0/0:10:10:0	0/0:33:33:0	HOM
V	4177205	I-DeNovo	A	AT	100	PASS	PH=none;FEX=PASS;FS=14/14;RN=NODE_CB3475_trim_bwaMEM_sort_modif.bam.generator.V2_2373_L810_D15:5:6::MH0;MQ=60;cigar=377M1I432M;SB=0.454545;AS=4-3;CVT=I;HD=-1_-1_-1_-1_-1_-1_-1_-1_-1_-1_-1_14_14_14_14_15_15_15_15_14_14_14_14_15_15_-1_;AO=14;VT=I	GT:DP:RO:AO	1/1:14:0:14	0/0:8:8:0	0/0:29:29:0	HOM
V	4345173	D-DeNovo	GA	G	94.4444	PASS	PH=none;FEX=PASS;FS=17/18;RN=NODE_CB3475_trim_bwaMEM_sort_modif.bam.generator.V2_2378_L407_D9:5:3::MH0;MQ=60;cigar=147M1D260M;SB=0.625;AS=2-3;CVT=D;HD=-1_-1_-1_-1_-1_-1_-1_10_10_10_10_10_10_10_10_10_10_10_9_9_10_10_10_10_-1_-1_;AO=9;VT=D	GT:DP:RO:AO	0/1:19:10:9	0/0:11:11:0	0/0:27:27:0	HET
V	4408948	X-DeNovo	C	T	80	PASS	PH=none;FEX=PASS;FS=20/25;RN=NODE_CB3475_trim_bwaMEM_sort_modif.bam.generator.V2_2380_L673_D19:5:5::MH0;MQ=60;cigar=673M;SB=0.5;AS=3-1;CVT=X;HD=-1_-1_-1_-1_-1_19_19_18_18_18_17_17_17_17_18_18_18_18_18_18_18_18_18_18_16_;AO=16;VT=X	GT:DP:RO:AO	1/1:16:0:16	0/0:12:12:0	0/0:31:31:0	HOM
V	4450014	D-DeNovo	AT	A	93.3333	PASS	PH=none;FEX=PASS;FS=14/15;RN=NODE_CB3475_trim_bwaMEM_sort_modif.bam.generator.V2_2383_L533_D10:2:3::MH0;MQ=60;cigar=334M1D199M;SB=0.4;AS=2-3;CVT=D;HD=-1_-1_-1_-1_-1_-1_-1_-1_-1_-1_16_16_17_17_17_17_17_17_17_17_17_17_17_18_-1_-1_;AO=16;VT=D	GT:DP:RO:AO	1/1:16:0:16	0/0:8:8:0	0/0:35:35:0	HOM
V	4536620	D-DeNovo	CT	C	78.5714	PASS	PH=PHASED-1-Havaiian_SV_trim_bwaMEM_sort_modif.bam;FEX=PASS;FS=11/14;RN=NODE_CB3475_trim_bwaMEM_sort_modif.bam.generator.V2_2387_L240_D6:2:2::MH0;MQ=60;cigar=115M1D125M;SB=0.5;AS=2-3;CVT=D;HD=-1_-1_-1_-1_-1_-1_-1_-1_-1_-1_-1_8_8_8_8_8_8_-1_-1_9_9_9_9_9_-1_-1_;AO=8;VT=D	GT:DP:RO:AO	0/1:20:12:8	0/0:11:11:0	0/0:19:19:0	HET
V	4628984	D-DeNovo	CA	C	93.3333	PASS	PH=none;FEX=PASS;FS=14/15;RN=NODE_CB3475_trim_bwaMEM_sort_modif.bam.generator.V2_2398_L343_D17:4:4::MH0;MQ=60;cigar=202M1D141M;SB=0.5;AS=2-3;CVT=D;HD=-1_-1_-1_-1_-1_-1_-1_-1_-1_-1_20_20_20_20_21_22_22_22_22_22_22_22_22_22_-1_-1_;AO=20;VT=D	GT:DP:RO:AO	1/1:20:0:20	0/0:7:7:0	0/0:28:28:0	HOM
V	4666521	I-DeNovo	C	CT	100	PASS	PH=none;FEX=PASS;FS=17/17;RN=NODE_CB3475_trim_bwaMEM_sort_modif.bam.generator.V2_2403_L518_D8:4:2::MH0;MQ=60;cigar=224M1I293M;SB=0.666667;AS=2-3;CVT=I;HD=-1_-1_-1_-1_-1_-1_-1_-1_7_8_8_8_8_8_8_8_8_8_8_7_7_7_7_7_7_-1_;AO=7;VT=I	GT:DP:RO:AO	1/1:7:0:7	0/0:9:9:0	0/0:48:48:0	HOM
V	4806234	D-DeNovo	AT	A	84.6154	PASS	PH=PHASED-13-N2_SV_trim_bwaMEM_sort_modif.bam;FEX=PASS;FS=11/13;RN=NODE_CB3475_trim_bwaMEM_sort_modif.bam.generator.V2_2410_L447_D7:1:4::MH0;MQ=60;cigar=354M1D93M;SB=0.2;AS=2-3;CVT=D;HD=-1_-1_-1_-1_-1_-1_-1_-1_-1_-1_-1_-1_7_7_7_7_7_7_7_7_7_7_7_-1_-1_-1_;AO=7;VT=D	GT:DP:RO:AO	1/1:7:0:7	0/0:8:8:0	0/0:2:2:0	HOM
V	5194471	D-DeNovo	TA	T	94.1176	PASS	PH=PHASED-8-N2_SV_trim_bwaMEM_sort_modif.bam;FEX=PASS;FS=16/17;RN=NODE_CB3475_trim_bwaMEM_sort_modif.bam.generator.V2_2427_L663_D15:6:5::MH0;MQ=60;cigar=330M1D333M;SB=0.545455;AS=2-3;CVT=D;HD=-1_-1_-1_-1_-1_-1_-1_-1_16_16_16_16_16_16_16_16_15_15_15_15_15_17_18_18_-1_-1_;AO=15;VT=D	GT:DP:RO:AO	1/1:15:0:15	0/0:16:16:0	.:0:0:0	HOM
V	5221900	D-DeNovo	CT	C	93.3333	PASS	PH=PHASED-15-N2_SV_trim_bwaMEM_sort_modif.bam;FEX=PASS;FS=14/15;RN=NODE_CB3475_trim_bwaMEM_sort_modif.bam.generator.V2_2428_L405_D11:2:3::MH0;MQ=60;cigar=184M1D221M;SB=0.4;AS=2-3;CVT=D;HD=-1_-1_-1_-1_-1_-1_-1_-1_-1_-1_11_11_11_11_11_11_10_11_11_11_11_12_12_12_-1_-1_;AO=10;VT=D	GT:DP:RO:AO	1/1:10:0:10	0/0:14:14:0	0/0:25:25:0	HOM
V	5345544	D-DeNovo	GA	G	93.75	PASS	PH=none;FEX=PASS;FS=15/16;RN=NODE_CB3475_trim_bwaMEM_sort_modif.bam.generator.V2_2439_L377_D11:2:1::MH0;MQ=60;cigar=200M1D177M;SB=0.666667;AS=2-3;CVT=D;HD=-1_-1_-1_-1_-1_-1_-1_-1_-1_14_13_13_13_13_13_13_13_14_14_14_14_14_14_14_-1_-1_;AO=13;VT=D	GT:DP:RO:AO	1/1:13:0:13	0/0:11:11:0	0/0:37:37:0	HOM
V	5402635	II-DeNovo	T	TGA	83.3333	PASS	PH=none;FEX=PASS;FS=10/12;RN=NODE_CB3475_trim_bwaMEM_sort_modif.bam.generator.V2_2441_L459_D14:4:3::MH0;MQ=60;cigar=230M2I227M;SB=0.571429;AS=2-3;CVT=II;HD=-1_-1_-1_-1_-1_-1_-1_-1_-1_-1_-1_-1_-1_-1_19_19_19_20_20_20_22_22_22_21_-1_-1_-1_;AO=19;VT=II	GT:DP:RO:AO	1/1:19:0:19	0/0:7:7:0	0/0:30:30:0	HOM
V	5705216	X-DeNovo	C	T	100	PASS	PH=PHASED-43-N2_SV_trim_bwaMEM_sort_modif.bam;FEX=PASS;FS=25/25;RN=NODE_CB3475_trim_bwaMEM_sort_modif.bam.generator.V2_2449_L346_D9:3:2::MH0;MQ=60;cigar=346M;SB=0.6;AS=2-1;CVT=X;HD=8_8_8_8_8_7_7_7_7_7_7_7_7_8_8_8_8_8_9_9_10_10_10_10_11_;AO=7;VT=X	GT:DP:RO:AO	1/1:7:0:7	0/0:10:10:0	0/0:47:47:0	HOM
V	5744097	D-DeNovo	AT	A	93.75	PASS	PH=PHASED-25-N2_SV_trim_bwaMEM_sort_modif.bam;FEX=PASS;FS=15/16;RN=NODE_CB3475_trim_bwaMEM_sort_modif.bam.generator.V2_2450_L488_D16:6:4::MH0;MQ=60;cigar=261M1D227M;SB=0.6;AS=2-3;CVT=D;HD=-1_-1_-1_-1_-1_-1_-1_-1_-1_19_19_19_20_20_20_20_20_20_20_20_20_20_20_21_-1_-1_;AO=19;VT=D	GT:DP:RO:AO	1/1:19:0:19	0/0:8:8:0	0/0:23:23:0	HOM
V	5935536	D-DeNovo	CA	C	60	PASS	PH=PHASED-38-N2_SV_trim_bwaMEM_sort_modif.bam;FEX=PASS;FS=9/15;RN=NODE_CB3475_trim_bwaMEM_sort_modif.bam.generator.V2_2451_L353_D7:3:2::MH0;MQ=60;cigar=210M1D143M;SB=0.6;AS=2-3;CVT=D;HD=-1_-1_-1_-1_-1_-1_-1_-1_-1_-1_13_13_12_11_11_-1_-1_-1_-1_-1_11_10_10_11_-1_-1_;AO=10;VT=D	GT:DP:RO:AO	1/1:10:0:10	0/0:11:11:0	0/0:18:18:0	HOM
V	5966296	X-DeNovo	A	C	100	PASS	PH=none;FEX=PASS;FS=25/25;RN=NODE_CB3475_trim_bwaMEM_sort_modif.bam.generator.V2_2452_L380_D12:3:4::MH0;MQ=60;cigar=380M;SB=0.428571;AS=2-1;CVT=X;HD=13_13_13_13_13_13_13_13_12_12_11_12_12_12_12_12_13_14_14_15_15_15_14_14_14_;AO=11;VT=X	GT:DP:RO:AO	1/1:11:0:11	0/0:13:13:0	0/0:13:13:0	HOM
V	5967866	X-DeNovo	C	T	100	PASS	PH=none;FEX=PASS;FS=25/25;RN=NODE_CB3475_trim_bwaMEM_sort_modif.bam.generator.V2_2455_L587_D22:7:7::MH0;MQ=60;cigar=587M;SB=0.5;AS=2-1;CVT=X;HD=27_27_28_28_27_27_27_27_27_27_27_27_27_27_27_27_27_27_26_26_26_26_26_26_27_;AO=26;VT=X	GT:DP:RO:AO	1/1:26:0:26	0/0:8:8:0	0/0:40:40:0	HOM
V	6528952	X-DeNovo	C	A	100	PASS	PH=PHASED-25-N2_SV_trim_bwaMEM_sort_modif.bam;FEX=PASS;FS=25/25;RN=NODE_CB3475_trim_bwaMEM_sort_modif.bam.generator.V2_2472_L506_D22:5:4::MH0;MQ=60;cigar=506M;SB=0.555556;AS=2-1;CVT=X;HD=20_20_21_22_22_22_22_21_19_22_22_21_20_20_20_21_21_21_21_21_22_21_21_21_21_;AO=19;VT=X	GT:DP:RO:AO	1/1:19:0:19	0/0:9:9:0	0/0:33:33:0	HOM
V	6620523	I-DeNovo	A	AT	100	PASS	PH=none;FEX=PASS;FS=16/16;RN=NODE_CB3475_trim_bwaMEM_sort_modif.bam.generator.V2_2474_L362_D16:4:1::MH0;MQ=60;cigar=177M1I184M;SB=0.8;AS=2-3;CVT=I;HD=-1_-1_-1_-1_-1_-1_-1_-1_-1_22_22_22_22_22_23_23_23_23_22_21_21_21_21_21_21_-1_;AO=21;VT=I	GT:DP:RO:AO	1/1:21:0:21	0/0:14:14:0	0/0:24:24:0	HOM
V	6728200	D-DeNovo	AT	A	93.75	PASS	PH=PHASED-25-N2_SV_trim_bwaMEM_sort_modif.bam;FEX=PASS;FS=15/16;RN=NODE_CB3475_trim_bwaMEM_sort_modif.bam.generator.V2_2478_L512_D10:2:4::MH0;MQ=60;cigar=281M1D231M;SB=0.333333;AS=2-3;CVT=D;HD=-1_-1_-1_-1_-1_-1_-1_-1_-1_17_17_17_18_18_18_17_17_17_17_17_16_16_16_17_-1_-1_;AO=16;VT=D	GT:DP:RO:AO	1/1:16:0:16	0/0:8:8:0	0/0:20:20:0	HOM
V	6819318	D-DeNovo	TA	T	93.3333	PASS	PH=PHASED-2-N2_SV_trim_bwaMEM_sort_modif.bam;FEX=PASS;FS=14/15;RN=NODE_CB3475_trim_bwaMEM_sort_modif.bam.generator.V2_2479_L644_D13:5:3::MH0;MQ=60;cigar=373M1D271M;SB=0.625;AS=2-3;CVT=D;HD=-1_-1_-1_-1_-1_-1_-1_-1_-1_-1_18_18_18_18_19_19_18_18_19_20_19_19_19_19_-1_-1_;AO=18;VT=D	GT:DP:RO:AO	1/1:18:0:18	0/0:15:15:0	.:0:0:0	HOM
V	6883830	X-DeNovo	C	T	100	PASS	PH=none;FEX=PASS;FS=25/25;RN=NODE_CB3475_trim_bwaMEM_sort_modif.bam.generator.V2_2481_L404_D14:4:1::MH0;MQ=60;cigar=404M;SB=0.8;AS=2-1;CVT=X;HD=20_20_20_20_20_19_19_20_20_19_19_19_19_19_20_20_20_20_20_20_20_20_20_19_19_;AO=19;VT=X	GT:DP:RO:AO	1/1:19:0:19	0/0:11:11:0	0/0:41:41:0	HOM
V	6920999	X-DeNovo	G	A	100	PASS	PH=none;FEX=PASS;FS=25/25;RN=NODE_CB3475_trim_bwaMEM_sort_modif.bam.generator.V2_2483_L337_D13:2:4::MH0;MQ=60;cigar=337M;SB=0.333333;AS=2-1;CVT=X;HD=12_12_12_12_12_12_12_12_11_11_11_11_11_12_13_13_13_14_14_14_15_18_19_18_17_;AO=11;VT=X	GT:DP:RO:AO	1/1:11:0:11	0/0:10:10:0	0/0:40:40:0	HOM
V	7063996	I-DeNovo	G	GA	100	PASS	PH=PHASED-2-N2_SV_trim_bwaMEM_sort_modif.bam;FEX=PASS;FS=15/15;RN=NODE_CB3475_trim_bwaMEM_sort_modif.bam.generator.V2_2492_L394_D12:4:3::MH0;MQ=60;cigar=179M1I214M;SB=0.571429;AS=2-3;CVT=I;HD=-1_-1_-1_-1_-1_-1_-1_-1_-1_-1_13_13_11_11_9_9_9_9_12_12_12_12_12_12_13_-1_;AO=9;VT=I	GT:DP:RO:AO	1/1:9:0:9	0/0:11:11:0	.:0:0:0	HOM
V	7124153	I-DeNovo	G	GA	100	PASS	PH=none;FEX=PASS;FS=18/18;RN=NODE_CB3475_trim_bwaMEM_sort_modif.bam.generator.V2_2494_L399_D16:5:2::MH0;MQ=60;cigar=139M1I259M;SB=0.714286;AS=2-3;CVT=I;HD=-1_-1_-1_-1_-1_-1_-1_25_25_27_27_27_27_28_28_27_27_27_27_27_27_26_25_24_24_-1_;AO=24;VT=I	GT:DP:RO:AO	1/1:24:0:24	0/0:14:14:0	0/0:28:28:0	HOM
V	7239254	D-DeNovo	AT	A	95	PASS	PH=PHASED-35-N2_SV_trim_bwaMEM_sort_modif.bam;FEX=PASS;FS=19/20;RN=NODE_CB3475_trim_bwaMEM_sort_modif.bam.generator.V2_2498_L595_D12:6:1::MH0;MQ=60;cigar=249M1D346M;SB=0.857143;AS=2-3;CVT=D;HD=-1_-1_-1_-1_-1_14_14_14_14_14_14_14_14_13_13_13_13_13_13_14_14_14_13_13_-1_-1_;AO=13;VT=D	GT:DP:RO:AO	1/1:13:0:13	0/0:11:11:0	0/0:34:34:0	HOM
V	7471127	X-DeNovo	C	T	100	PASS	PH=PHASED-54-N2_SV_trim_bwaMEM_sort_modif.bam;FEX=PASS;FS=25/25;RN=NODE_CB3475_trim_bwaMEM_sort_modif.bam.generator.V2_2505_L485_D15:6:3::MH0;MQ=60;cigar=485M;SB=0.666667;AS=2-1;CVT=X;HD=17_17_17_16_17_17_17_17_17_17_16_16_16_16_17_17_17_17_17_17_17_17_17_17_18_;AO=16;VT=X	GT:DP:RO:AO	1/1:16:0:16	0/0:10:10:0	0/0:33:33:0	HOM
V	7537068	X-DeNovo	C	T	100	PASS	PH=PHASED-16-N2_SV_trim_bwaMEM_sort_modif.bam;FEX=PASS;FS=25/25;RN=NODE_CB3475_trim_bwaMEM_sort_modif.bam.generator.V2_2508_L305_D11:1:4::MH0;MQ=60;cigar=305M;SB=0.2;AS=2-1;CVT=X;HD=14_14_14_14_14_13_13_13_13_14_13_13_13_13_13_13_13_13_13_12_11_11_11_11_11_;AO=11;VT=X	GT:DP:RO:AO	1/1:11:0:11	0/0:10:10:0	0/0:30:30:0	HOM
V	7554842	X-DeNovo	C	T	100	PASS	PH=none;FEX=PASS;FS=25/25;RN=NODE_CB3475_trim_bwaMEM_sort_modif.bam.generator.V2_2509_L444_D20:8:3::MH0;MQ=60;cigar=444M;SB=0.727273;AS=2-1;CVT=X;HD=27_27_27_27_27_27_27_27_26_26_26_26_26_26_27_28_30_30_30_30_30_30_30_30_30_;AO=26;VT=X	GT:DP:RO:AO	1/1:26:0:26	0/0:13:13:0	0/0:38:38:0	HOM
V	7929292	D-DeNovo	AT	A	93.3333	PASS	PH=PHASED-23-N2_SV_trim_bwaMEM_sort_modif.bam;FEX=PASS;FS=14/15;RN=NODE_CB3475_trim_bwaMEM_sort_modif.bam.generator.V2_2530_L427_D16:3:5::MH0;MQ=60;cigar=159M1D268M;SB=0.375;AS=2-3;CVT=D;HD=-1_-1_-1_-1_-1_-1_-1_-1_-1_-1_17_17_17_17_17_17_18_18_18_19_19_19_19_19_-1_-1_;AO=17;VT=D	GT:DP:RO:AO	1/1:17:0:17	0/0:15:15:0	0/0:32:32:0	HOM
V	8032517	X-DeNovo	G	A	100	PASS	PH=none;FEX=PASS;FS=25/25;RN=NODE_CB3475_trim_bwaMEM_sort_modif.bam.generator.V2_2533_L546_D19:5:6::MH0;MQ=60;cigar=546M;SB=0.454545;AS=2-1;CVT=X;HD=21_21_22_21_21_20_19_18_18_17_18_18_18_18_18_18_18_18_19_20_20_20_20_20_20_;AO=17;VT=X	GT:DP:RO:AO	1/1:17:0:17	0/0:9:9:0	0/0:36:36:0	HOM
V	8069311	I-DeNovo	T	TA	100	PASS	PH=none;FEX=PASS;FS=18/18;RN=NODE_CB3475_trim_bwaMEM_sort_modif.bam.generator.V2_2534_L490_D16:3:5::MH0;MQ=60;cigar=317M1I172M;SB=0.375;AS=2-3;CVT=I;HD=-1_-1_-1_-1_-1_-1_-1_21_21_21_21_19_19_19_19_19_19_19_19_19_20_20_20_19_19_-1_;AO=19;VT=I	GT:DP:RO:AO	1/1:19:0:19	0/0:8:8:0	0/0:36:36:0	HOM
V	8218786	D-DeNovo	GT	G	94.4444	PASS	PH=none;FEX=PASS;FS=17/18;RN=NODE_CB3475_trim_bwaMEM_sort_modif.bam.generator.V2_2535_L518_D15:3:7::MH0;MQ=60;cigar=320M1D198M;SB=0.3;AS=2-3;CVT=D;HD=-1_-1_-1_-1_-1_-1_-1_16_16_16_16_16_17_17_18_17_17_16_16_16_16_15_16_16_-1_-1_;AO=15;VT=D	GT:DP:RO:AO	1/1:15:0:15	0/0:10:10:0	0/0:28:28:0	HOM
V	8435078	D-DeNovo	GA	G	93.75	PASS	PH=none;FEX=PASS;FS=15/16;RN=NODE_CB3475_trim_bwaMEM_sort_modif.bam.generator.V2_2539_L503_D10:3:3::MH0;MQ=60;cigar=220M1D283M;SB=0.5;AS=2-3;CVT=D;HD=-1_-1_-1_-1_-1_-1_-1_-1_-1_14_15_14_14_14_14_14_14_14_14_14_14_15_15_15_-1_-1_;AO=14;VT=D	GT:DP:RO:AO	1/1:14:0:14	0/0:9:9:0	0/0:45:45:0	HOM
V	8741330	I-DeNovo	A	AT	100	PASS	PH=none;FEX=PASS;FS=17/17;RN=NODE_CB3475_trim_bwaMEM_sort_modif.bam.generator.V2_2545_L505_D15:3:6::MH0;MQ=60;cigar=190M1I314M;SB=0.333333;AS=2-3;CVT=I;HD=-1_-1_-1_-1_-1_-1_-1_-1_20_21_21_22_22_22_22_22_21_21_20_20_20_20_20_19_18_-1_;AO=18;VT=I	GT:DP:RO:AO	1/1:18:0:18	0/0:12:12:0	0/0:37:37:0	HOM
V	9196873	X-DeNovo	C	T	100	PASS	PH=none;FEX=PASS;FS=25/25;RN=NODE_CB3475_trim_bwaMEM_sort_modif.bam.generator.V2_2550_L391_D9:1:3::MH0;MQ=60;cigar=391M;SB=0.25;AS=2-1;CVT=X;HD=11_11_12_12_12_12_12_11_11_12_12_12_12_13_12_12_12_12_13_13_13_13_12_12_12_;AO=11;VT=X	GT:DP:RO:AO	1/1:11:0:11	0/0:13:13:0	0/0:30:30:0	HOM
V	9214287	I-DeNovo	C	CA	100	PASS	PH=none;FEX=PASS;FS=16/16;RN=NODE_CB3475_trim_bwaMEM_sort_modif.bam.generator.V2_2553_L486_D24:2:5::MH0;MQ=60;cigar=315M1I170M;SB=0.285714;AS=2-3;CVT=I;HD=-1_-1_-1_-1_-1_-1_-1_-1_-1_33_33_32_32_31_30_28_28_27_27_27_27_26_28_28_27_-1_;AO=26;VT=I	GT:DP:RO:AO	1/1:26:0:26	0/0:13:13:0	0/0:32:32:0	HOM
V	9308615	I-DeNovo	C	CA	100	PASS	PH=PHASED-24-N2_SV_trim_bwaMEM_sort_modif.bam;FEX=PASS;FS=17/17;RN=NODE_CB3475_trim_bwaMEM_sort_modif.bam.generator.V2_2556_L421_D11:1:1::MH0;MQ=60;cigar=154M1I266M;SB=0.5;AS=2-3;CVT=I;HD=-1_-1_-1_-1_-1_-1_-1_-1_16_17_17_17_17_17_15_16_16_16_16_16_16_16_15_16_16_-1_;AO=15;VT=I	GT:DP:RO:AO	1/1:15:0:15	0/0:12:12:0	0/0:38:38:0	HOM
V	9449693	D-DeNovo	GT	G	94.1176	PASS	PH=PHASED-26-N2_SV_trim_bwaMEM_sort_modif.bam;FEX=PASS;FS=16/17;RN=NODE_CB3475_trim_bwaMEM_sort_modif.bam.generator.V2_2558_L395_D14:6:3::MH0;MQ=60;cigar=130M1D265M;SB=0.666667;AS=2-3;CVT=D;HD=-1_-1_-1_-1_-1_-1_-1_-1_22_22_22_22_22_22_22_22_23_23_23_23_23_22_22_23_-1_-1_;AO=22;VT=D	GT:DP:RO:AO	1/1:22:0:22	0/0:8:8:0	0/0:34:34:0	HOM
V	9751684	D-DeNovo	AT	A	93.3333	PASS	PH=none;FEX=PASS;FS=14/15;RN=NODE_CB3475_trim_bwaMEM_sort_modif.bam.generator.V2_2561_L520_D13:4:3::MH0;MQ=60;cigar=204M1D316M;SB=0.571429;AS=2-3;CVT=D;HD=-1_-1_-1_-1_-1_-1_-1_-1_-1_-1_15_13_13_14_14_14_13_14_14_14_14_13_12_12_-1_-1_;AO=12;VT=D	GT:DP:RO:AO	1/1:12:0:12	0/0:11:11:0	0/0:15:15:0	HOM
V	10050095	D-DeNovo	CA	C	93.75	PASS	PH=none;FEX=PASS;FS=15/16;RN=NODE_CB3475_trim_bwaMEM_sort_modif.bam.generator.V2_2567_L357_D16:5:5::MH0;MQ=60;cigar=116M1D241M;SB=0.5;AS=2-3;CVT=D;HD=-1_-1_-1_-1_-1_-1_-1_-1_-1_20_20_19_18_18_18_18_19_18_18_18_18_18_19_20_-1_-1_;AO=18;VT=D	GT:DP:RO:AO	1/1:18:0:18	0/0:11:11:0	0/0:22:22:0	HOM
V	10105119	I-DeNovo	G	GT	93.3333	PASS	PH=none;FEX=PASS;FS=14/15;RN=NODE_CB3475_trim_bwaMEM_sort_modif.bam.generator.V2_2571_L442_D15:5:4::MH0;MQ=60;cigar=151M1I290M;SB=0.555556;AS=2-3;CVT=I;HD=-1_-1_-1_-1_-1_-1_-1_-1_-1_-1_-1_28_27_27_27_27_27_27_27_26_26_25_25_26_26_-1_;AO=25;VT=I	GT:DP:RO:AO	1/1:25:0:25	0/0:9:9:0	0/0:36:36:0	HOM
V	10116962	X-DeNovo	C	A	100	PASS	PH=PHASED-25-N2_SV_trim_bwaMEM_sort_modif.bam;FEX=PASS;FS=25/25;RN=NODE_CB3475_trim_bwaMEM_sort_modif.bam.generator.V2_2572_L501_D15:2:4::MH0;MQ=60;cigar=501M;SB=0.333333;AS=2-1;CVT=X;HD=17_17_17_17_17_18_18_18_18_20_21_21_21_21_20_20_21_20_20_20_20_20_19_19_19_;AO=17;VT=X	GT:DP:RO:AO	1/1:17:0:17	0/0:10:10:0	0/0:41:41:0	HOM
V	10226592	D-DeNovo	AT	A	94.1176	PASS	PH=none;FEX=PASS;FS=16/17;RN=NODE_CB3475_trim_bwaMEM_sort_modif.bam.generator.V2_2573_L486_D16:2:5::MH0;MQ=60;cigar=309M1D177M;SB=0.285714;AS=3-3;CVT=D;HD=-1_-1_-1_-1_-1_-1_-1_-1_18_18_18_19_19_19_19_19_18_17_16_15_16_16_16_16_-1_-1_;AO=15;VT=D	GT:DP:RO:AO	1/1:15:0:15	0/0:10:10:0	0/0:30:30:0	HOM
V	10273536	I-DeNovo	T	TA	100	PASS	PH=none;FEX=PASS;FS=16/16;RN=NODE_CB3475_trim_bwaMEM_sort_modif.bam.generator.V2_2576_L510_D17:4:3::MH0;MQ=60;cigar=218M1I291M;SB=0.571429;AS=2-3;CVT=I;HD=-1_-1_-1_-1_-1_-1_-1_-1_-1_29_29_28_28_28_27_24_23_22_23_22_22_22_21_22_22_-1_;AO=21;VT=I	GT:DP:RO:AO	1/1:21:0:21	0/0:9:9:0	0/0:40:40:0	HOM
V	10624012	X-DeNovo	A	T	100	PASS	PH=PHASED-15-N2_SV_trim_bwaMEM_sort_modif.bam;FEX=PASS;FS=25/25;RN=NODE_CB3475_trim_bwaMEM_sort_modif.bam.generator.V2_2579_L575_D20:6:5::MH0;MQ=60;cigar=575M;SB=0.545455;AS=2-1;CVT=X;HD=20_20_20_20_20_20_22_22_22_21_21_22_23_24_24_25_25_25_25_25_25_26_24_25_25_;AO=20;VT=X	GT:DP:RO:AO	1/1:20:0:20	0/0:9:9:0	0/0:25:25:0	HOM
V	10627585	I-DeNovo	T	TA	100	PASS	PH=none;FEX=PASS;FS=18/18;RN=NODE_CB3475_trim_bwaMEM_sort_modif.bam.generator.V2_2581_L292_D11:2:2::MH0;MQ=60;cigar=144M1I147M;SB=0.5;AS=2-3;CVT=I;HD=-1_-1_-1_-1_-1_-1_-1_12_13_13_13_13_13_13_13_14_14_14_14_14_14_15_14_14_14_-1_;AO=12;VT=I	GT:DP:RO:AO	1/1:12:0:12	0/0:10:10:0	0/0:26:26:0	HOM
V	10719640	D-DeNovo	CA	C	93.3333	PASS	PH=none;FEX=PASS;FS=14/15;RN=NODE_CB3475_trim_bwaMEM_sort_modif.bam.generator.V2_2582_L515_D14:2:5::MH0;MQ=60;cigar=332M1D183M;SB=0.285714;AS=2-3;CVT=D;HD=-1_-1_-1_-1_-1_-1_-1_-1_-1_-1_21_21_21_21_21_21_21_21_21_22_22_22_22_21_-1_-1_;AO=21;VT=D	GT:DP:RO:AO	1/1:21:0:21	0/0:8:8:0	0/0:30:30:0	HOM
V	10726827	X-DeNovo	C	A	100	PASS	PH=none;FEX=PASS;FS=25/25;RN=NODE_CB3475_trim_bwaMEM_sort_modif.bam.generator.V2_2583_L394_D9:1:4::MH0;MQ=60;cigar=394M;SB=0.2;AS=2-1;CVT=X;HD=9_9_9_9_9_9_9_9_9_9_9_9_9_9_9_9_10_11_11_11_11_12_13_13_13_;AO=9;VT=X	GT:DP:RO:AO	1/1:9:0:9	0/0:9:9:0	0/0:28:28:0	HOM
V	10947674	D-DeNovo	GT	G	94.1176	PASS	PH=PHASED-8-N2_SV_trim_bwaMEM_sort_modif.bam;FEX=PASS;FS=16/17;RN=NODE_CB3475_trim_bwaMEM_sort_modif.bam.generator.V2_2587_L290_D9:3:1::MH0;MQ=60;cigar=139M1D151M;SB=0.75;AS=2-3;CVT=D;HD=-1_-1_-1_-1_-1_-1_-1_-1_13_13_13_13_12_12_12_12_12_12_12_12_12_13_13_13_-1_-1_;AO=12;VT=D	GT:DP:RO:AO	1/1:12:0:12	0/0:11:11:0	0/0:24:24:0	HOM
V	11143115	D-DeNovo	GT	G	95	PASS	PH=none;FEX=PASS;FS=19/20;RN=NODE_CB3475_trim_bwaMEM_sort_modif.bam.generator.V2_2592_L543_D15:4:2::MH0;MQ=60;cigar=247M1D296M;SB=0.666667;AS=2-3;CVT=D;HD=-1_-1_-1_-1_-1_24_25_25_25_24_25_24_23_24_24_24_24_24_24_24_23_23_23_23_-1_-1_;AO=23;VT=D	GT:DP:RO:AO	1/1:23:0:23	0/0:10:10:0	0/0:37:37:0	HOM
V	11208380	D-DeNovo	GT	G	93.75	PASS	PH=PHASED-25-N2_SV_trim_bwaMEM_sort_modif.bam;FEX=PASS;FS=15/16;RN=NODE_CB3475_trim_bwaMEM_sort_modif.bam.generator.V2_2593_L470_D12:3:2::MH0;MQ=60;cigar=206M1D264M;SB=0.6;AS=2-3;CVT=D;HD=-1_-1_-1_-1_-1_-1_-1_-1_-1_16_16_16_16_16_16_16_16_16_16_16_16_16_16_16_-1_-1_;AO=16;VT=D	GT:DP:RO:AO	1/1:16:0:16	0/0:10:10:0	0/0:31:31:0	HOM
V	11795351	X-DeNovo	C	T	100	PASS	PH=PHASED-50-N2_SV_trim_bwaMEM_sort_modif.bam;FEX=PASS;FS=25/25;RN=NODE_CB3475_trim_bwaMEM_sort_modif.bam.generator.V2_2597_L569_D18:3:4::MH0;MQ=60;cigar=569M;SB=0.428571;AS=2-1;CVT=X;HD=23_23_23_23_23_23_23_23_22_22_22_22_20_22_22_22_22_22_22_23_23_25_24_23_22_;AO=20;VT=X	GT:DP:RO:AO	1/1:20:0:20	0/0:19:19:0	0/0:39:39:0	HOM
V	11849079	D-DeNovo	TA	T	93.3333	PASS	PH=PHASED-68-N2_SV_trim_bwaMEM_sort_modif.bam;FEX=PASS;FS=14/15;RN=NODE_CB3475_trim_bwaMEM_sort_modif.bam.generator.V2_2598_L503_D10:3:3::MH0;MQ=60;cigar=319M1D184M;SB=0.5;AS=2-3;CVT=D;HD=-1_-1_-1_-1_-1_-1_-1_-1_-1_-1_15_15_16_16_17_17_17_17_17_16_14_14_14_14_-1_-1_;AO=14;VT=D	GT:DP:RO:AO	1/1:14:0:14	0/0:14:14:0	.:0:0:0	HOM
V	11914726	I-DeNovo	A	AT	100	PASS	PH=none;FEX=PASS;FS=17/17;RN=NODE_CB3475_trim_bwaMEM_sort_modif.bam.generator.V2_2604_L558_D16:7:6::MH0;MQ=60;cigar=263M1I294M;SB=0.538462;AS=2-3;CVT=I;HD=-1_-1_-1_-1_-1_-1_-1_-1_17_17_18_18_18_16_16_16_16_16_16_17_17_17_17_17_17_-1_;AO=16;VT=I	GT:DP:RO:AO	1/1:16:0:16	0/0:12:12:0	0/0:37:37:0	HOM
V	12140754	D-DeNovo	GA	G	93.3333	PASS	PH=none;FEX=PASS;FS=14/15;RN=NODE_CB3475_trim_bwaMEM_sort_modif.bam.generator.V2_2606_L453_D17:7:1::MH0;MQ=60;cigar=178M1D275M;SB=0.875;AS=2-3;CVT=D;HD=-1_-1_-1_-1_-1_-1_-1_-1_-1_-1_22_23_23_23_24_25_25_25_26_27_27_27_27_27_-1_-1_;AO=22;VT=D	GT:DP:RO:AO	1/1:22:0:22	0/0:11:11:0	0/0:29:29:0	HOM
V	12284051	D-DeNovo	GT	G	93.3333	PASS	PH=PHASED-11-N2_SV_trim_bwaMEM_sort_modif.bam;FEX=PASS;FS=14/15;RN=NODE_CB3475_trim_bwaMEM_sort_modif.bam.generator.V2_2610_L404_D11:2:2::MH0;MQ=60;cigar=213M1D191M;SB=0.5;AS=2-3;CVT=D;HD=-1_-1_-1_-1_-1_-1_-1_-1_-1_-1_15_15_15_15_15_14_12_12_11_10_10_9_9_9_-1_-1_;AO=9;VT=D	GT:DP:RO:AO	1/1:9:0:9	0/0:8:8:0	0/0:30:30:0	HOM
V	13120875	X-DeNovo	G	T	100	PASS	PH=PHASED-15-N2_SV_trim_bwaMEM_sort_modif.bam;FEX=PASS;FS=25/25;RN=NODE_CB3475_trim_bwaMEM_sort_modif.bam.generator.V2_2624_L412_D8:3:1::MH0;MQ=60;cigar=412M;SB=0.75;AS=3-1;CVT=X;HD=7_7_7_7_7_7_7_7_7_7_8_8_8_8_7_8_8_8_8_8_7_7_7_7_7_;AO=7;VT=X	GT:DP:RO:AO	1/1:7:0:7	0/0:12:12:0	0/0:39:39:0	HOM
V	13218302	I-DeNovo	G	GA	100	PASS	PH=none;FEX=PASS;FS=18/18;RN=NODE_CB3475_trim_bwaMEM_sort_modif.bam.generator.V2_2628_L550_D15:4:3::MH0;MQ=60;cigar=247M1I302M;SB=0.571429;AS=2-3;CVT=I;HD=-1_-1_-1_-1_-1_-1_-1_16_16_16_15_15_14_14_14_14_14_14_14_14_14_13_13_13_13_-1_;AO=13;VT=I	GT:DP:RO:AO	1/1:13:0:13	0/0:9:9:0	0/0:37:37:0	HOM
V	13357403	X-DeNovo	A	G	100	PASS	PH=none;FEX=PASS;FS=25/25;RN=NODE_CB3475_trim_bwaMEM_sort_modif.bam.generator.V2_2633_L678_D21:8:5::MH0;MQ=60;cigar=678M;SB=0.615385;AS=3-1;CVT=X;HD=24_24_23_24_26_26_26_26_26_26_26_25_24_24_24_24_24_24_25_26_26_26_26_26_25_;AO=23;VT=X	GT:DP:RO:AO	1/1:23:0:23	0/0:13:13:0	0/0:29:29:0	HOM
V	13646001	X-DeNovo	C	A	32	PASS	PH=PHASED-6-Havaiian_SV_trim_bwaMEM_sort_modif.bam;FEX=PASS;FS=8/25;RN=NODE_CB3475_trim_bwaMEM_sort_modif.bam.generator.V2_2638_L207_D4:1:1::MH0;MQ=60;cigar=183M24S;SB=0.5;AS=6-2;CVT=X;HD=-1_-1_-1_-1_-1_-1_7_8_-1_-1_-1_-1_-1_-1_-1_-1_-1_-1_-1_9_9_9_9_9_9_;AO=7;VT=X	GT:DP:RO:AO	0/1:17:10:7	0/1:21:7:14	0/1:78:16:62	HET
V	13729876	D-DeNovo	GA	G	93.3333	PASS	PH=none;FEX=PASS;FS=14/15;RN=NODE_CB3475_trim_bwaMEM_sort_modif.bam.generator.V2_2642_L374_D9:3:2::MH0;MQ=60;cigar=222M1D152M;SB=0.6;AS=2-3;CVT=D;HD=-1_-1_-1_-1_-1_-1_-1_-1_-1_-1_13_13_13_13_13_13_13_11_11_11_11_11_11_11_-1_-1_;AO=11;VT=D	GT:DP:RO:AO	1/1:11:0:11	0/0:12:12:0	0/0:27:27:0	HOM
V	13845095	D-DeNovo	CA	C	94.7368	PASS	PH=PHASED-40-N2_SV_trim_bwaMEM_sort_modif.bam;FEX=PASS;FS=18/19;RN=NODE_CB3475_trim_bwaMEM_sort_modif.bam.generator.V2_2644_L385_D12:2:4::MH0;MQ=60;cigar=186M1D199M;SB=0.333333;AS=2-3;CVT=D;HD=-1_-1_-1_-1_-1_-1_16_16_16_16_16_16_16_16_17_17_16_16_17_17_14_14_13_13_-1_-1_;AO=13;VT=D	GT:DP:RO:AO	1/1:13:0:13	0/0:14:14:0	0/0:27:27:0	HOM
V	13928391	X-DeNovo	G	A	100	PASS	PH=PHASED-25-N2_SV_trim_bwaMEM_sort_modif.bam;FEX=PASS;FS=25/25;RN=NODE_CB3475_trim_bwaMEM_sort_modif.bam.generator.V2_2646_L443_D16:4:5::MH0;MQ=60;cigar=443M;SB=0.444444;AS=2-1;CVT=X;HD=20_20_20_20_21_21_22_21_21_21_21_21_21_21_21_21_21_21_21_21_21_21_21_20_20_;AO=20;VT=X	GT:DP:RO:AO	1/1:20:0:20	0/0:15:15:0	0/0:42:42:0	HOM
V	13934514	I-DeNovo	C	CA	100	PASS	PH=PHASED-6-N2_SV_trim_bwaMEM_sort_modif.bam;FEX=PASS;FS=17/17;RN=NODE_CB3475_trim_bwaMEM_sort_modif.bam.generator.V2_2649_L477_D17:4:2::MH0;MQ=60;cigar=209M1I267M;SB=0.666667;AS=2-3;CVT=I;HD=-1_-1_-1_-1_-1_-1_-1_-1_18_19_19_19_19_19_19_19_19_19_19_20_21_20_20_19_19_-1_;AO=18;VT=I	GT:DP:RO:AO	1/1:18:0:18	0/0:8:8:0	0/0:28:28:0	HOM
V	14114710	D-DeNovo	GT	G	93.3333	PASS	PH=PHASED-17-N2_SV_trim_bwaMEM_sort_modif.bam;FEX=PASS;FS=14/15;RN=NODE_CB3475_trim_bwaMEM_sort_modif.bam.generator.V2_2652_L439_D12:4:2::MH0;MQ=60;cigar=139M1D300M;SB=0.666667;AS=2-3;CVT=D;HD=-1_-1_-1_-1_-1_-1_-1_-1_-1_-1_15_16_15_15_13_13_14_14_15_15_15_16_16_15_-1_-1_;AO=13;VT=D	GT:DP:RO:AO	1/1:13:0:13	0/0:10:10:0	0/0:32:32:0	HOM
V	14149210	I-DeNovo	C	CA	100	PASS	PH=none;FEX=PASS;FS=17/17;RN=NODE_CB3475_trim_bwaMEM_sort_modif.bam.generator.V2_2654_L241_D11:5:4::MH0;MQ=60;cigar=107M1I133M;SB=0.555556;AS=2-3;CVT=I;HD=-1_-1_-1_-1_-1_-1_-1_-1_13_12_12_12_12_12_12_12_12_12_12_12_12_12_12_12_12_-1_;AO=12;VT=I	GT:DP:RO:AO	1/1:12:0:12	0/0:11:11:0	0/0:40:40:0	HOM
V	14211281	I-DeNovo	C	CA	100	PASS	PH=none;FEX=PASS;FS=15/15;RN=NODE_CB3475_trim_bwaMEM_sort_modif.bam.generator.V2_2657_L469_D14:6:2::MH0;MQ=60;cigar=193M1I275M;SB=0.75;AS=2-3;CVT=I;HD=-1_-1_-1_-1_-1_-1_-1_-1_-1_-1_19_19_17_17_16_16_16_16_15_14_14_13_12_12_12_-1_;AO=12;VT=I	GT:DP:RO:AO	1/1:12:0:12	0/0:12:12:0	0/0:16:16:0	HOM
V	15013075	42D-DeNovo	GACAGATGTGATAACCACTACACCACGAGACCGCTGTTCCGAG	G	88	PASS	PH=none;FEX=PASS;FS=22/25;RN=NODE_CB3475_trim_bwaMEM_sort_modif.bam.generator.V2_2669_L490_D14:3:3::MH0;MQ=60;cigar=236M254S;SB=0.5;AS=1-2;CVT=42D;HD=14_14_15_15_15_14_14_15_15_14_15_16_17_18_16_16_16_16_16_15_15_15_-1_-1_-1_-1_-1_-1_-1_-1_-1_-1_-1_-1_-1_-1_-1_-1_-1_-1_-1_-1_-1_-1_-1_-1_-1_-1_-1_-1_-1_-1_-1_-1_-1_-1_-1_-1_-1_-1_-1_-1_-1_-1_-1_-1_-1_;AO=14;VT=DDDDDDDDDDDDDDDDDDDDDDDDDDDDDDDDDDDDDD…	GT:DP:RO:AO	0/1:29:15:14	0/0:5:5:0	0/0:25:25:0	HET
V	16280186	X-DeNovo	G	T	100	PASS	PH=PHASED-147-N2_SV_trim_bwaMEM_sort_modif.bam;FEX=PASS;FS=25/25;RN=NODE_CB3475_trim_bwaMEM_sort_modif.bam.generator.V2_2725_L425_D9:3:3::MH0;MQ=60;cigar=425M;SB=0.5;AS=2-1;CVT=X;HD=11_10_10_10_9_8_8_8_8_8_8_8_8_8_9_9_9_9_9_9_9_9_9_9_9_;AO=8;VT=X	GT:DP:RO:AO	1/1:8:0:8	0/0:13:13:0	0/0:25:25:0	HOM
V	18563737	I-DeNovo	G	GT	75	PASS	PH=PHASED-9-N2_SV_trim_bwaMEM_sort_modif.bam;FEX=PASS;FS=12/16;RN=NODE_CB3475_trim_bwaMEM_sort_modif.bam.generator.V2_2854_L253_D12:5:1::MH0;MQ=60;cigar=122M1I130M;SB=0.833333;AS=2-3;CVT=I;HD=-1_-1_-1_-1_-1_-1_-1_-1_-1_-1_-1_-1_-1_19_19_19_19_19_19_19_19_19_19_19_19_-1_;AO=19;VT=I	GT:DP:RO:AO	1/1:19:0:19	0/0:8:8:0	.:0:0:0	HOM
V	19684575	X-DeNovo	T	C	100	PASS	PH=PHASED-30-N2_SV_trim_bwaMEM_sort_modif.bam;FEX=PASS;FS=25/25;RN=NODE_CB3475_trim_bwaMEM_sort_modif.bam.generator.V2_2943_L395_D11:6:2::MH0;MQ=60;cigar=38S357M;SB=0.75;AS=4-2;CVT=X;HD=25_25_25_25_25_25_25_24_23_23_23_23_23_23_23_23_23_23_23_24_24_24_24_24_26_;AO=23;VT=X	GT:DP:RO:AO	0/1:32:9:23	0/0:9:9:0	0/0:29:29:0	HET
X	259347	X-DeNovo	C	T	100	PASS	PH=PHASED-6-Havaiian_SV_trim_bwaMEM_sort_modif.bam;FEX=PASS;FS=25/25;RN=NODE_CB3475_trim_bwaMEM_sort_modif.bam.generator.V2_3053_L466_D17:4:1::MH0;MQ=60;cigar=466M;SB=0.8;AS=2-1;CVT=X;HD=15_15_15_15_15_15_15_15_16_17_17_17_17_17_19_19_19_19_20_21_22_22_23_23_23_;AO=15;VT=X	GT:DP:RO:AO	1/1:15:0:15	0/0:12:12:0	0/0:31:31:0	HOM	4-96%
X	299380	X-DeNovo	C	T	100	PASS	PH=none;FEX=PASS;FS=25/25;RN=NODE_CB3475_trim_bwaMEM_sort_modif.bam.generator.V2_3057_L640_D36:8:9::MH0;MQ=60;cigar=640M;SB=0.470588;AS=2-1;CVT=X;HD=41_42_42_41_41_41_41_41_41_41_40_40_40_39_39_38_38_39_41_41_42_41_41_43_42_;AO=38;VT=X	GT:DP:RO:AO	1/1:38:0:38	0/0:11:11:0	0/0:31:31:0	HOM	1
X	531149	X-DeNovo	C	T	100	PASS	PH=none;FEX=PASS;FS=25/25;RN=NODE_CB3475_trim_bwaMEM_sort_modif.bam.generator.V2_3067_L627_D29:8:8::MH0;MQ=60;cigar=627M;SB=0.5;AS=2-1;CVT=X;HD=33_32_32_31_32_32_32_32_33_33_34_34_34_34_34_34_35_35_35_34_34_34_34_34_35_;AO=31;VT=X	GT:DP:RO:AO	1/1:31:0:31	0/0:19:19:0	0/0:26:26:0	HOM	1
X	693760	X-DeNovo	C	T	100	PASS	PH=PHASED-31-N2_SV_trim_bwaMEM_sort_modif.bam;FEX=PASS;FS=25/25;RN=NODE_CB3475_trim_bwaMEM_sort_modif.bam.generator.V2_3073_L240_D15:4:6::MH0;MQ=60;cigar=240M;SB=0.4;AS=2-1;CVT=X;HD=15_15_17_17_17_17_16_17_17_16_16_16_15_15_17_18_19_19_19_19_20_20_21_21_21_;AO=15;VT=X	GT:DP:RO:AO	1/1:15:0:15	0/0:7:7:0	0/0:37:37:0	HOM	4-96%%
X	759800	D-DeNovo	TA	T	85	PASS	PH=PHASED-25-N2_SV_trim_bwaMEM_sort_modif.bam;FEX=PASS;FS=17/20;RN=NODE_CB3475_trim_bwaMEM_sort_modif.bam.generator.V2_3078_L519_D14:1:7::MH0;MQ=60;cigar=277M1D242M;SB=0.125;AS=3-3;CVT=D;HD=-1_-1_-1_-1_-1_16_16_15_17_17_17_17_17_17_17_17_17_17_17_17_16_-1_16_-1_-1_-1_;AO=15;VT=D	GT:DP:RO:AO	0/1:47:32:15	0/0:9:9:0	0/0:18:18:0	HOM	1
X	852726	D-DeNovo	AG	A	93.75	PASS	PH=none;FEX=PASS;FS=15/16;RN=NODE_CB3475_trim_bwaMEM_sort_modif.bam.generator.V2_3081_L539_D16:5:6::MH0;MQ=60;cigar=304M1D235M;SB=0.454545;AS=2-3;CVT=D;HD=-1_-1_-1_-1_-1_-1_-1_-1_-1_23_23_23_23_22_22_22_22_22_22_22_22_22_21_21_-1_-1_;AO=21;VT=D	GT:DP:RO:AO	1/1:21:0:21	0/0:9:9:0	0/0:10:10:0	HOM	96%-4%
X	903639	X-DeNovo	G	A	100	PASS	PH=none;FEX=PASS;FS=25/25;RN=NODE_CB3475_trim_bwaMEM_sort_modif.bam.generator.V2_3086_L569_D21:6:6::MH0;MQ=60;cigar=569M;SB=0.5;AS=2-1;CVT=X;HD=21_21_22_21_22_22_22_22_25_23_23_24_24_24_25_25_25_25_26_26_25_25_25_25_25_;AO=21;VT=X	GT:DP:RO:AO	1/1:21:0:21	0/0:10:10:0	0/0:39:39:0	HOM	1
X	1281340	D-DeNovo	TA	T	93.75	PASS	PH=PHASED-51-N2_SV_trim_bwaMEM_sort_modif.bam;FEX=PASS;FS=15/16;RN=NODE_CB3475_trim_bwaMEM_sort_modif.bam.generator.V2_3108_L540_D15:5:4::MH0;MQ=60;cigar=188M1D352M;SB=0.555556;AS=2-3;CVT=D;HD=-1_-1_-1_-1_-1_-1_-1_-1_-1_17_19_19_18_19_19_19_18_18_18_18_18_18_18_17_-1_-1_;AO=17;VT=D	GT:DP:RO:AO	1/1:17:0:17	0/0:13:13:0	0/0:18:18:0	HOM	1
X	1290023	D-DeNovo	TA	T	92.3077	PASS	PH=PHASED-37-N2_SV_trim_bwaMEM_sort_modif.bam;FEX=PASS;FS=12/13;RN=NODE_CB3475_trim_bwaMEM_sort_modif.bam.generator.V2_3111_L524_D18:2:8::MH0;MQ=60;cigar=333M1D191M;SB=0.2;AS=3-3;CVT=D;HD=-1_-1_-1_-1_-1_-1_-1_-1_-1_-1_-1_-1_21_19_20_21_21_22_23_24_22_21_22_22_-1_-1_;AO=19;VT=D	GT:DP:RO:AO	0/1:23:4:19	0/0:7:7:0	.:0:0:0	HET	77%-23%
X	1487778	D-DeNovo	GT	G	93.3333	PASS	PH=PHASED-17-N2_SV_trim_bwaMEM_sort_modif.bam;FEX=PASS;FS=14/15;RN=NODE_CB3475_trim_bwaMEM_sort_modif.bam.generator.V2_3122_L406_D10:3:1::MH0;MQ=60;cigar=182M1D224M;SB=0.75;AS=2-3;CVT=D;HD=-1_-1_-1_-1_-1_-1_-1_-1_-1_-1_15_16_16_16_17_17_17_17_16_16_16_16_16_16_-1_-1_;AO=15;VT=D	GT:DP:RO:AO	1/1:15:0:15	0/0:8:8:0	.:0:0:0	HET	90%-10%
X	1539579	X-DeNovo	C	T	100	PASS	PH=PHASED-190-N2_SV_trim_bwaMEM_sort_modif.bam;FEX=PASS;FS=25/25;RN=NODE_CB3475_trim_bwaMEM_sort_modif.bam.generator.V2_3124_L625_D21:4:5::MH0;MQ=60;cigar=625M;SB=0.444444;AS=2-1;CVT=X;HD=26_25_26_27_27_27_27_27_27_27_26_26_26_26_28_28_28_28_27_27_26_26_26_25_25_;AO=25;VT=X	GT:DP:RO:AO	1/1:25:0:25	0/0:15:15:0	0/0:20:20:0	HOM	1
X	1910743	X-DeNovo	C	T	100	PASS	PH=PHASED-94-N2_SV_trim_bwaMEM_sort_modif.bam;FEX=PASS;FS=25/25;RN=NODE_CB3475_trim_bwaMEM_sort_modif.bam.generator.V2_3132_L535_D17:2:3::MH0;MQ=60;cigar=535M;SB=0.4;AS=2-1;CVT=X;HD=15_15_15_15_15_15_15_15_15_15_15_15_15_14_14_16_15_15_15_15_15_16_16_16_17_;AO=14;VT=X	GT:DP:RO:AO	0/1:17:3:14	0/0:7:7:0	0/0:26:26:0	HET	76%-24%
X	2041072	X-DeNovo	C	T	100	PASS	PH=none;FEX=PASS;FS=25/25;RN=NODE_CB3475_trim_bwaMEM_sort_modif.bam.generator.V2_3136_L421_D7:1:3::MH0;MQ=60;cigar=421M;SB=0.25;AS=2-1;CVT=X;HD=9_9_9_9_9_9_9_9_9_9_9_9_9_9_9_9_9_9_9_9_9_9_7_7_7_;AO=7;VT=X	GT:DP:RO:AO	0/1:28:21:7	0/0:16:16:0	0/0:29:29:0	HET	75-25%
X	2122485	X-DeNovo	G	A	100	PASS	PH=none;FEX=PASS;FS=25/25;RN=NODE_CB3475_trim_bwaMEM_sort_modif.bam.generator.V2_3138_L612_D17:5:8::MH0;MQ=60;cigar=612M;SB=0.384615;AS=2-1;CVT=X;HD=17_17_17_16_16_16_16_16_16_16_16_16_16_17_16_16_16_16_16_15_16_16_16_16_16_;AO=15;VT=X	GT:DP:RO:AO	0/1:18:3:15	0/0:12:12:0	0/0:35:35:0	HET	86%-14%
X	2226429	X-DeNovo	G	A	100	PASS	PH=PHASED-25-N2_SV_trim_bwaMEM_sort_modif.bam;FEX=PASS;FS=25/25;RN=NODE_CB3475_trim_bwaMEM_sort_modif.bam.generator.V2_3144_L529_D19:5:9::MH0;MQ=60;cigar=529M;SB=0.357143;AS=3-1;CVT=X;HD=12_12_13_13_13_13_13_13_13_13_14_15_15_15_15_15_15_15_15_15_15_16_16_16_16_;AO=12;VT=X	GT:DP:RO:AO	0/1:20:8:12	0/0:9:9:0	0/0:32:32:0	HET	59%-41%
X	2268165	X-DeNovo	T	A	64	PASS	PH=PHASED-11-N2_SV_trim_bwaMEM_sort_modif.bam;FEX=PASS;FS=16/25;RN=NODE_CB3475_trim_bwaMEM_sort_modif.bam.generator.V2_3148_L241_D5:3:1::MH0;MQ=60;cigar=241M;SB=0.75;AS=2-1;CVT=X;HD=-1_-1_-1_-1_-1_-1_-1_-1_7_7_7_7_7_7_7_7_7_7_7_7_7_7_7_7_-1_;AO=7;VT=X	GT:DP:RO:AO	0/1:26:19:7	0/0:10:10:0	0/0:25:25:0	HET	59-41%
X	2760392	28D-DeNovo	ATGAGAAGGCAGCCCTGAGTGTGAAGAAG	A	96	PASS	PH=none;FEX=PASS;FS=24/25;RN=NODE_CB3475_trim_bwaMEM_sort_modif.bam.generator.V2_3164_L453_D14:2:5::MH0;MQ=60;cigar=249M204S;SB=0.285714;AS=1-2;CVT=28D;HD=19_19_19_19_19_18_19_19_18_18_18_18_18_18_19_19_19_19_18_18_18_18_18_18_-1_-1_-1_-1_-1_-1_-1_-1_-1_-1_-1_-1_-1_-1_-1_-1_-1_-1_-1_-1_-1_-1_-1_-1_-1_-1_-1_-1_-1_;AO=18;VT=DDDDDDDDDDDDDDDDDDDDDDDDDDDD	GT:DP:RO:AO	1/1:18:0:18	0/0:9:9:0	0/0:18:18:0	HOM	1
X	2853848	X-DeNovo	G	A	100	PASS	PH=PHASED-35-N2_SV_trim_bwaMEM_sort_modif.bam;FEX=PASS;FS=25/25;RN=NODE_CB3475_trim_bwaMEM_sort_modif.bam.generator.V2_3165_L502_D15:3:3::MH0;MQ=60;cigar=502M;SB=0.5;AS=2-1;CVT=X;HD=20_20_20_20_19_19_19_18_18_18_18_18_18_18_18_18_18_18_18_18_18_16_16_16_16_;AO=16;VT=X	GT:DP:RO:AO	1/1:16:0:16	0/0:10:10:0	0/0:31:31:0	HOM	1
X	3253754	X-DeNovo	G	A	100	PASS	PH=none;FEX=PASS;FS=25/25;RN=NODE_CB3475_trim_bwaMEM_sort_modif.bam.generator.V2_3172_L539_D19:2:8::MH0;MQ=60;cigar=539M;SB=0.2;AS=2-1;CVT=X;HD=23_23_24_24_24_24_24_24_23_23_23_24_24_22_22_21_21_22_23_23_23_22_22_22_22_;AO=21;VT=X	GT:DP:RO:AO	1/1:21:0:21	0/0:8:8:0	0/0:25:25:0	HOM
X	3515308	X-DeNovo	T	A	100	PASS	PH=none;FEX=PASS;FS=25/25;RN=NODE_CB3475_trim_bwaMEM_sort_modif.bam.generator.V2_3175_L631_D25:6:6::MH0;MQ=60;cigar=631M;SB=0.5;AS=2-1;CVT=X;HD=25_24_24_25_25_25_25_25_26_26_25_25_25_25_25_25_25_25_25_26_26_27_28_28_28_;AO=24;VT=X	GT:DP:RO:AO	0/1:134:110:24	0/0:84:84:0	0/0:281:281:0	HOM
X	3784840	X-DeNovo	G	A	100	PASS	PH=none;FEX=PASS;FS=25/25;RN=NODE_CB3475_trim_bwaMEM_sort_modif.bam.generator.V2_3185_L316_D12:3:3::MH0;MQ=60;cigar=316M;SB=0.5;AS=2-1;CVT=X;HD=16_16_16_16_16_16_16_16_16_17_17_17_16_16_16_16_15_15_15_15_14_14_14_14_14_;AO=14;VT=X	GT:DP:RO:AO	1/1:14:0:14	0/0:10:10:0	0/0:27:27:0	HOM
X	4006429	X-DeNovo	C	T	100	PASS	PH=PHASED-25-N2_SV_trim_bwaMEM_sort_modif.bam;FEX=PASS;FS=25/25;RN=NODE_CB3475_trim_bwaMEM_sort_modif.bam.generator.V2_3190_L520_D14:5:3::MH0;MQ=60;cigar=520M;SB=0.625;AS=2-1;CVT=X;HD=17_17_17_17_17_17_17_17_17_18_18_18_18_18_19_19_19_19_19_19_19_19_18_18_17_;AO=17;VT=X	GT:DP:RO:AO	1/1:17:0:17	0/0:8:8:0	0/0:20:20:0	HOM
X	4271548	X-DeNovo	G	A	100	PASS	PH=PHASED-3-N2_SV_trim_bwaMEM_sort_modif.bam;FEX=PASS;FS=25/25;RN=NODE_CB3475_trim_bwaMEM_sort_modif.bam.generator.V2_3200_L623_D19:4:7::MH0;MQ=60;cigar=623M;SB=0.363636;AS=2-1;CVT=X;HD=19_19_20_20_20_20_20_20_20_22_21_21_22_20_20_20_20_20_20_20_20_18_18_19_19_;AO=18;VT=X	GT:DP:RO:AO	1/1:18:0:18	0/0:12:12:0	0/0:21:21:0	HOM
X	5328944	X-DeNovo	C	T	100	PASS	PH=none;FEX=PASS;FS=25/25;RN=NODE_CB3475_trim_bwaMEM_sort_modif.bam.generator.V2_3219_L655_D15:4:5::MH0;MQ=60;cigar=655M;SB=0.444444;AS=2-1;CVT=X;HD=13_14_14_16_16_16_16_16_16_16_16_16_16_15_15_15_16_16_16_16_16_17_17_17_19_;AO=13;VT=X	GT:DP:RO:AO	1/1:13:0:13	0/0:9:9:0	0/0:23:23:0	HOM
X	5575570	X-DeNovo	C	T	100	PASS	PH=PHASED-13-N2_SV_trim_bwaMEM_sort_modif.bam;FEX=PASS;FS=25/25;RN=NODE_CB3475_trim_bwaMEM_sort_modif.bam.generator.V2_3222_L461_D18:9:3::MH0;MQ=60;cigar=461M;SB=0.75;AS=2-1;CVT=X;HD=21_21_21_21_22_22_22_22_22_22_22_22_22_22_22_22_22_22_22_22_22_21_22_22_22_;AO=21;VT=X	GT:DP:RO:AO	1/1:21:0:21	0/0:10:10:0	0/0:35:35:0	HOM
X	5645548	X-DeNovo	A	G	100	PASS	PH=PHASED-22-N2_SV_trim_bwaMEM_sort_modif.bam;FEX=PASS;FS=25/25;RN=NODE_CB3475_trim_bwaMEM_sort_modif.bam.generator.V2_3225_L440_D15:2:4::MH0;MQ=60;cigar=440M;SB=0.333333;AS=2-1;CVT=X;HD=19_18_18_18_17_16_15_15_15_14_14_14_14_13_13_13_13_13_13_13_13_14_14_14_14_;AO=13;VT=X	GT:DP:RO:AO	1/1:13:0:13	0/0:9:9:0	0/0:25:25:0	HOM
X	6092496	X-DeNovo	A	T	100	PASS	PH=none;FEX=PASS;FS=25/25;RN=NODE_CB3475_trim_bwaMEM_sort_modif.bam.generator.V2_3233_L593_D13:6:3::MH0;MQ=60;cigar=593M;SB=0.666667;AS=2-1;CVT=X;HD=16_15_15_15_15_15_15_14_14_14_14_13_13_13_13_13_13_13_13_13_13_14_14_14_14_;AO=13;VT=X	GT:DP:RO:AO	1/1:13:0:13	0/0:12:12:0	0/0:23:23:0	HOM
X	6093427	X-DeNovo	G	A	100	PASS	PH=PHASED-25-N2_SV_trim_bwaMEM_sort_modif.bam;FEX=PASS;FS=25/25;RN=NODE_CB3475_trim_bwaMEM_sort_modif.bam.generator.V2_3234_L553_D16:6:1::MH0;MQ=60;cigar=553M;SB=0.857143;AS=2-1;CVT=X;HD=14_14_14_14_14_14_13_13_14_14_13_14_14_12_11_11_13_14_14_14_12_12_13_13_13_;AO=11;VT=X	GT:DP:RO:AO	1/1:11:0:11	0/0:9:9:0	0/0:25:25:0	HOM
X	6280077	X-DeNovo	G	C	100	PASS	PH=none;FEX=PASS;FS=25/25;RN=NODE_CB3475_trim_bwaMEM_sort_modif.bam.generator.V2_3237_L459_D15:2:6::MH0;MQ=60;cigar=459M;SB=0.25;AS=2-1;CVT=X;HD=17_17_18_18_18_18_19_20_20_20_20_20_20_20_20_20_20_19_19_19_19_19_19_19_18_;AO=17;VT=X	GT:DP:RO:AO	1/1:17:0:17	0/0:12:12:0	0/0:32:32:0	HOM
X	6309003	X-DeNovo	C	T	100	PASS	PH=none;FEX=PASS;FS=25/25;RN=NODE_CB3475_trim_bwaMEM_sort_modif.bam.generator.V2_3241_L409_D21:6:2::MH0;MQ=60;cigar=409M;SB=0.75;AS=2-1;CVT=X;HD=21_20_20_20_21_21_21_20_21_21_20_20_20_20_20_20_20_20_20_20_21_25_29_30_30_;AO=20;VT=X	GT:DP:RO:AO	1/1:20:0:20	0/0:12:12:0	0/0:24:24:0	HOM
X	6917367	X-DeNovo	C	T	100	PASS	PH=none;FEX=PASS;FS=25/25;RN=NODE_CB3475_trim_bwaMEM_sort_modif.bam.generator.V2_3253_L289_D16:3:7::MH0;MQ=60;cigar=289M;SB=0.3;AS=2-1;CVT=X;HD=20_19_19_19_19_21_21_21_21_22_22_22_22_23_23_22_21_21_21_20_19_19_19_19_19_;AO=19;VT=X	GT:DP:RO:AO	1/1:19:0:19	0/0:9:9:0	0/0:32:32:0	HOM
X	6968378	X-DeNovo	C	T	100	PASS	PH=none;FEX=PASS;FS=25/25;RN=NODE_CB3475_trim_bwaMEM_sort_modif.bam.generator.V2_3255_L256_D9:3:3::MH0;MQ=60;cigar=256M;SB=0.5;AS=2-1;CVT=X;HD=11_11_11_11_11_11_11_11_12_12_12_12_13_13_13_13_12_12_12_12_12_12_12_12_12_;AO=11;VT=X	GT:DP:RO:AO	1/1:11:0:11	0/0:10:10:0	0/0:21:21:0	HOM
X	7666694	X-DeNovo	C	T	100	PASS	PH=none;FEX=PASS;FS=25/25;RN=NODE_CB3475_trim_bwaMEM_sort_modif.bam.generator.V2_3263_L556_D17:5:4::MH0;MQ=60;cigar=556M;SB=0.555556;AS=2-1;CVT=X;HD=20_19_19_19_19_19_20_20_20_20_20_20_20_20_20_19_20_19_20_20_20_21_20_20_20_;AO=19;VT=X	GT:DP:RO:AO	1/1:19:0:19	0/0:10:10:0	0/0:19:19:0	HOM
X	8062552	X-DeNovo	T	A	100	PASS	PH=PHASED-52-N2_SV_trim_bwaMEM_sort_modif.bam;FEX=PASS;FS=25/25;RN=NODE_CB3475_trim_bwaMEM_sort_modif.bam.generator.V2_3271_L491_D18:2:6::MH0;MQ=60;cigar=491M;SB=0.25;AS=2-1;CVT=X;HD=17_16_17_17_17_17_18_18_18_20_20_21_22_22_22_21_21_21_21_23_25_25_25_25_26_;AO=16;VT=X	GT:DP:RO:AO	0/1:30:14:16	0/0:12:12:0	0/0:37:37:0	HOM
X	8113424	X-DeNovo	C	T	100	PASS	PH=PHASED-50-N2_SV_trim_bwaMEM_sort_modif.bam;FEX=PASS;FS=25/25;RN=NODE_CB3475_trim_bwaMEM_sort_modif.bam.generator.V2_3274_L488_D15:3:3::MH0;MQ=60;cigar=488M;SB=0.5;AS=2-1;CVT=X;HD=17_19_19_20_20_19_20_20_20_20_20_22_23_23_23_23_23_24_24_24_24_23_23_23_23_;AO=17;VT=X	GT:DP:RO:AO	1/1:17:0:17	0/0:8:8:0	0/0:29:29:0	HOM
X	8565192	I-DeNovo	T	TG	88.2353	PASS	PH=none;FEX=PASS;FS=15/17;RN=NODE_CB3475_trim_bwaMEM_sort_modif.bam.generator.V2_3281_L392_D11:2:3::MH0;MQ=60;cigar=247M1I144M;SB=0.4;AS=2-3;CVT=I;HD=-1_-1_-1_-1_-1_-1_-1_-1_-1_19_19_19_19_19_19_18_18_18_19_19_19_18_17_17_-1_-1_;AO=17;VT=I	GT:DP:RO:AO	1/1:17:0:17	0/0:8:8:0	.:0:0:0	HOM
X	8918078	X-DeNovo	C	T	100	PASS	PH=PHASED-25-N2_SV_trim_bwaMEM_sort_modif.bam;FEX=PASS;FS=25/25;RN=NODE_CB3475_trim_bwaMEM_sort_modif.bam.generator.V2_3285_L351_D9:1:1::MH0;MQ=60;cigar=351M;SB=0.5;AS=2-1;CVT=X;HD=11_11_10_10_10_10_10_10_11_10_10_10_10_10_11_12_12_12_12_12_13_13_13_14_15_;AO=10;VT=X	GT:DP:RO:AO	1/1:10:0:10	0/0:10:10:0	0/0:15:15:0	HOM
X	9179992	X-DeNovo	G	A	100	PASS	PH=none;FEX=PASS;FS=25/25;RN=NODE_CB3475_trim_bwaMEM_sort_modif.bam.generator.V2_3288_L386_D14:4:4::MH0;MQ=60;cigar=386M;SB=0.5;AS=2-1;CVT=X;HD=18_18_18_18_17_17_17_17_17_17_17_17_17_17_16_16_15_15_15_14_14_14_14_14_13_;AO=13;VT=X	GT:DP:RO:AO	1/1:13:0:13	0/0:10:10:0	0/0:32:32:0	HOM
X	9343668	I-DeNovo	G	GA	100	PASS	PH=PHASED-25-N2_SV_trim_bwaMEM_sort_modif.bam;FEX=PASS;FS=16/16;RN=NODE_CB3475_trim_bwaMEM_sort_modif.bam.generator.V2_3292_L701_D18:6:7::MH0;MQ=60;cigar=354M1I346M;SB=0.461538;AS=2-3;CVT=I;HD=-1_-1_-1_-1_-1_-1_-1_-1_-1_22_23_22_22_22_22_22_21_21_20_17_18_18_17_18_18_-1_;AO=17;VT=I	GT:DP:RO:AO	1/1:17:0:17	0/0:9:9:0	0/0:22:22:0	HOM
X	9405039	X-DeNovo	G	A	100	PASS	PH=none;FEX=PASS;FS=25/25;RN=NODE_CB3475_trim_bwaMEM_sort_modif.bam.generator.V2_3293_L665_D21:8:4::MH0;MQ=60;cigar=665M;SB=0.666667;AS=2-1;CVT=X;HD=27_27_27_27_28_28_27_27_26_26_27_27_28_29_28_27_27_27_26_25_26_25_25_25_23_;AO=23;VT=X	GT:DP:RO:AO	1/1:23:0:23	0/0:9:9:0	0/0:29:29:0	HOM
X	9421095	X-DeNovo	G	A	100	PASS	PH=none;FEX=PASS;FS=25/25;RN=NODE_CB3475_trim_bwaMEM_sort_modif.bam.generator.V2_3294_L651_D20:7:6::MH0;MQ=60;cigar=651M;SB=0.538462;AS=2-1;CVT=X;HD=20_20_21_22_22_24_25_25_25_24_24_24_24_24_24_23_23_23_24_24_24_24_23_23_25_;AO=20;VT=X	GT:DP:RO:AO	1/1:20:0:20	0/0:9:9:0	0/0:32:32:0	HOM
X	9515962	X-DeNovo	G	A	100	PASS	PH=PHASED-25-N2_SV_trim_bwaMEM_sort_modif.bam;FEX=PASS;FS=25/25;RN=NODE_CB3475_trim_bwaMEM_sort_modif.bam.generator.V2_3295_L478_D10:4:1::MH0;MQ=60;cigar=478M;SB=0.8;AS=2-1;CVT=X;HD=13_13_13_13_13_13_13_13_12_13_13_13_13_13_14_14_14_14_14_14_13_13_13_14_14_;AO=12;VT=X	GT:DP:RO:AO	1/1:12:0:12	0/0:14:14:0	0/0:22:22:0	HOM
X	9708875	X-DeNovo	G	A	100	PASS	PH=none;FEX=PASS;FS=25/25;RN=NODE_CB3475_trim_bwaMEM_sort_modif.bam.generator.V2_3298_L601_D13:3:5::MH0;MQ=60;cigar=601M;SB=0.375;AS=2-1;CVT=X;HD=14_14_14_14_14_13_13_13_15_15_15_15_15_15_15_14_14_14_14_14_13_12_12_12_12_;AO=12;VT=X	GT:DP:RO:AO	1/1:12:0:12	0/0:13:13:0	0/0:27:27:0	HOM
X	9732227	X-DeNovo	T	A	100	PASS	PH=none;FEX=PASS;FS=25/25;RN=NODE_CB3475_trim_bwaMEM_sort_modif.bam.generator.V2_3299_L565_D15:3:4::MH0;MQ=60;cigar=565M;SB=0.428571;AS=2-1;CVT=X;HD=15_15_14_13_13_13_13_13_14_14_14_15_16_16_16_16_16_20_19_19_19_17_16_16_16_;AO=13;VT=X	GT:DP:RO:AO	1/1:13:0:13	0/0:11:11:0	0/0:29:29:0	HOM
X	9791080	X-DeNovo	G	A	100	PASS	PH=none;FEX=PASS;FS=25/25;RN=NODE_CB3475_trim_bwaMEM_sort_modif.bam.generator.V2_3300_L535_D16:4:4::MH0;MQ=60;cigar=535M;SB=0.5;AS=2-1;CVT=X;HD=17_17_17_17_17_18_18_18_18_18_19_19_19_19_19_18_17_17_16_17_16_17_17_17_17_;AO=16;VT=X	GT:DP:RO:AO	1/1:16:0:16	0/0:9:9:0	0/0:32:32:0	HOM
X	10289213	X-DeNovo	G	A	100	PASS	PH=none;FEX=PASS;FS=25/25;RN=NODE_CB3475_trim_bwaMEM_sort_modif.bam.generator.V2_3308_L410_D13:5:3::MH0;MQ=60;cigar=410M;SB=0.625;AS=2-1;CVT=X;HD=19_19_19_18_18_19_19_19_19_19_19_19_19_19_19_19_19_19_19_19_19_19_19_18_18_;AO=18;VT=X	GT:DP:RO:AO	1/1:18:0:18	0/0:11:11:0	0/0:32:32:0	HOM
X	10338527	X-DeNovo	G	A	100	PASS	PH=PHASED-50-N2_SV_trim_bwaMEM_sort_modif.bam;FEX=PASS;FS=25/25;RN=NODE_CB3475_trim_bwaMEM_sort_modif.bam.generator.V2_3311_L580_D20:4:8::MH0;MQ=60;cigar=580M;SB=0.333333;AS=3-1;CVT=X;HD=20_20_19_19_20_20_18_18_18_17_17_17_16_16_16_17_17_17_17_17_18_17_18_17_17_;AO=16;VT=X	GT:DP:RO:AO	1/1:16:0:16	0/0:16:16:0	0/0:22:22:0	HOM
X	11193764	X-DeNovo	A	G	100	PASS	PH=none;FEX=PASS;FS=25/25;RN=NODE_CB3475_trim_bwaMEM_sort_modif.bam.generator.V2_3330_L681_D19:7:6::MH0;MQ=60;cigar=681M;SB=0.538462;AS=2-1;CVT=X;HD=27_27_27_26_26_23_23_23_23_23_23_23_23_23_23_23_23_23_22_22_22_22_22_22_22_;AO=22;VT=X	GT:DP:RO:AO	1/1:22:0:22	0/0:9:9:0	0/0:40:40:0	HOM
X	11612355	X-DeNovo	C	T	100	PASS	PH=PHASED-76-N2_SV_trim_bwaMEM_sort_modif.bam;FEX=PASS;FS=25/25;RN=NODE_CB3475_trim_bwaMEM_sort_modif.bam.generator.V2_3333_L642_D23:7:5::MH0;MQ=60;cigar=642M;SB=0.583333;AS=2-1;CVT=X;HD=27_27_27_27_29_29_29_28_28_26_26_27_27_26_26_25_25_25_25_25_25_26_26_26_27_;AO=25;VT=X	GT:DP:RO:AO	1/1:25:0:25	0/0:12:12:0	0/0:22:22:0	HOM
X	12183708	X-DeNovo	G	A	100	PASS	PH=none;FEX=PASS;FS=25/25;RN=NODE_CB3475_trim_bwaMEM_sort_modif.bam.generator.V2_3342_L654_D20:7:9::MH0;MQ=60;cigar=654M;SB=0.4375;AS=2-1;CVT=X;HD=19_19_20_20_20_20_20_20_20_20_20_20_20_20_20_20_20_20_20_20_20_20_20_20_21_;AO=19;VT=X	GT:DP:RO:AO	1/1:19:0:19	0/0:16:16:0	0/0:16:16:0	HOM
X	12255561	I-DeNovo	G	GT	100	PASS	PH=none;FEX=PASS;FS=16/16;RN=NODE_CB3475_trim_bwaMEM_sort_modif.bam.generator.V2_3345_L450_D13:7:2::MH0;MQ=60;cigar=173M1I276M;SB=0.777778;AS=2-3;CVT=I;HD=-1_-1_-1_-1_-1_-1_-1_-1_-1_22_21_21_21_21_21_21_21_21_20_18_18_18_18_18_19_-1_;AO=18;VT=I	GT:DP:RO:AO	1/1:18:0:18	0/0:16:16:0	0/0:36:36:0	HOM
X	12494691	X-DeNovo	G	A	100	PASS	PH=none;FEX=PASS;FS=25/25;RN=NODE_CB3475_trim_bwaMEM_sort_modif.bam.generator.V2_3347_L386_D11:2:6::MH0;MQ=60;cigar=386M;SB=0.25;AS=2-1;CVT=X;HD=12_12_12_12_13_13_14_13_11_11_12_12_12_11_10_10_10_10_10_10_10_10_10_10_10_;AO=10;VT=X	GT:DP:RO:AO	1/1:10:0:10	0/0:8:8:0	0/0:26:26:0	HOM
X	12963569	5D-DeNovo	AGCTGC	A	96	PASS	PH=PHASED-25-N2_SV_trim_bwaMEM_sort_modif.bam;FEX=PASS;FS=24/25;RN=NODE_CB3475_trim_bwaMEM_sort_modif.bam.generator.V2_3351_L527_D16:6:2::MH0;MQ=60;cigar=183M5D344M;SB=0.75;AS=2-3;CVT=5D;HD=18_18_18_17_17_17_17_17_17_17_17_17_17_17_17_17_17_17_17_17_18_16_16_16_-1_-1_-1_-1_-1_-1_;AO=16;VT=DDDDD	GT:DP:RO:AO	1/1:16:0:16	0/0:8:8:0	0/0:37:37:0	HOM
X	14088312	X-DeNovo	G	A	100	PASS	PH=none;FEX=PASS;FS=25/25;RN=NODE_CB3475_trim_bwaMEM_sort_modif.bam.generator.V2_3372_L409_D10:4:3::MH0;MQ=60;cigar=409M;SB=0.571429;AS=2-1;CVT=X;HD=11_11_11_11_11_11_11_11_11_12_12_12_12_12_12_12_12_12_12_12_12_12_12_12_12_;AO=11;VT=X	GT:DP:RO:AO	1/1:11:0:11	0/0:12:12:0	0/0:26:26:0	HOM
X	14477668	X-DeNovo	G	A	100	PASS	PH=PHASED-56-N2_SV_trim_bwaMEM_sort_modif.bam;FEX=PASS;FS=25/25;RN=NODE_CB3475_trim_bwaMEM_sort_modif.bam.generator.V2_3385_L430_D18:3:4::MH0;MQ=60;cigar=430M;SB=0.428571;AS=2-1;CVT=X;HD=23_23_22_21_21_21_21_21_20_20_20_20_19_19_19_19_18_17_17_17_17_19_19_19_19_;AO=17;VT=X	GT:DP:RO:AO	1/1:17:0:17	0/0:15:15:0	0/0:19:19:0	HOM
X	14497052	X-DeNovo	G	A	100	PASS	PH=PHASED-25-N2_SV_trim_bwaMEM_sort_modif.bam;FEX=PASS;FS=25/25;RN=NODE_CB3475_trim_bwaMEM_sort_modif.bam.generator.V2_3390_L392_D15:4:5::MH0;MQ=60;cigar=392M;SB=0.444444;AS=2-1;CVT=X;HD=18_16_18_18_18_18_17_17_17_17_17_17_17_17_17_17_17_17_17_16_15_15_15_15_15_;AO=15;VT=X	GT:DP:RO:AO	1/1:15:0:15	0/0:10:10:0	0/0:33:33:0	HOM
X	14841265	X-DeNovo	G	A	100	PASS	PH=PHASED-11-Havaiian_SV_trim_bwaMEM_sort_modif.bam;FEX=PASS;FS=25/25;RN=NODE_CB3475_trim_bwaMEM_sort_modif.bam.generator.V2_3397_L494_D24:4:6::MH0;MQ=60;cigar=494M;SB=0.4;AS=2-1;CVT=X;HD=19_19_20_21_22_21_21_21_21_21_24_24_25_25_27_27_27_27_27_27_30_30_29_28_28_;AO=19;VT=X	GT:DP:RO:AO	1/1:19:0:19	0/0:11:11:0	0/0:33:33:0	HOM
X	15008187	X-DeNovo	G	A	100	PASS	PH=PHASED-33-N2_SV_trim_bwaMEM_sort_modif.bam;FEX=PASS;FS=25/25;RN=NODE_CB3475_trim_bwaMEM_sort_modif.bam.generator.V2_3400_L420_D9:4:3::MH0;MQ=60;cigar=420M;SB=0.571429;AS=2-1;CVT=X;HD=15_14_15_15_15_15_15_15_16_16_16_15_16_16_18_17_17_16_16_16_14_14_14_14_14_;AO=14;VT=X	GT:DP:RO:AO	0/1:34:20:14	0/0:11:11:0	0/0:26:26:0	HOM
X	15366963	X-DeNovo	G	A	100	PASS	PH=none;FEX=PASS;FS=25/25;RN=NODE_CB3475_trim_bwaMEM_sort_modif.bam.generator.V2_3407_L504_D12:2:5::MH0;MQ=60;cigar=504M;SB=0.285714;AS=2-1;CVT=X;HD=15_15_16_16_16_16_16_16_16_16_16_16_16_16_16_16_16_16_16_16_18_18_17_17_17_;AO=15;VT=X	GT:DP:RO:AO	1/1:15:0:15	0/0:12:12:0	0/0:32:32:0	HOM
X	15689973	X-DeNovo	G	A	100	PASS	PH=none;FEX=PASS;FS=25/25;RN=NODE_CB3475_trim_bwaMEM_sort_modif.bam.generator.V2_3414_L538_D22:9:3::MH0;MQ=60;cigar=538M;SB=0.75;AS=2-1;CVT=X;HD=30_31_31_31_31_31_31_31_31_30_30_30_30_30_30_30_30_30_29_28_28_27_27_27_27_;AO=27;VT=X	GT:DP:RO:AO	1/1:27:0:27	0/0:9:9:0	0/0:20:20:0	HOM
X	15925218	X-DeNovo	A	G	100	PASS	PH=PHASED-23-N2_SV_trim_bwaMEM_sort_modif.bam;FEX=PASS;FS=25/25;RN=NODE_CB3475_trim_bwaMEM_sort_modif.bam.generator.V2_3422_L528_D15:4:6::MH0;MQ=60;cigar=528M;SB=0.4;AS=2-1;CVT=X;HD=22_22_22_23_23_23_23_23_23_23_22_22_22_22_22_22_22_21_21_21_21_21_21_20_20_;AO=20;VT=X	GT:DP:RO:AO	1/1:20:0:20	0/0:8:8:0	0/0:33:33:0	HOM
X	15999451	X-DeNovo	G	A	100	PASS	PH=none;FEX=PASS;FS=25/25;RN=NODE_CB3475_trim_bwaMEM_sort_modif.bam.generator.V2_3425_L778_D23:11:8::MH0;MQ=60;cigar=778M;SB=0.578947;AS=3-1;CVT=X;HD=17_17_17_17_16_17_17_17_17_17_17_17_17_17_17_16_16_16_15_15_15_15_15_15_18_;AO=15;VT=X	GT:DP:RO:AO	1/1:15:0:15	0/0:13:13:0	0/0:17:17:0	HOM
X	16281735	X-DeNovo	G	A	96	PASS	PH=none;FEX=PASS;FS=24/25;RN=NODE_CB3475_trim_bwaMEM_sort_modif.bam.generator.V2_3434_L377_D13:5:1::MH0;MQ=60;cigar=377M;SB=0.833333;AS=2-1;CVT=X;HD=15_14_13_13_13_13_13_14_14_14_14_14_14_14_14_15_15_17_17_17_17_17_17_17_-1_;AO=13;VT=X	GT:DP:RO:AO	0/1:27:14:13	0/0:7:7:0	0/0:25:25:0	HOM
X	16393885	X-DeNovo	G	A	100	PASS	PH=none;FEX=PASS;FS=25/25;RN=NODE_CB3475_trim_bwaMEM_sort_modif.bam.generator.V2_3438_L446_D13:3:2::MH0;MQ=60;cigar=446M;SB=0.6;AS=2-1;CVT=X;HD=17_17_17_17_17_18_18_18_18_18_19_18_18_18_18_18_17_17_17_17_17_16_14_14_15_;AO=14;VT=X	GT:DP:RO:AO	1/1:14:0:14	0/0:11:11:0	0/0:25:25:0	HOM
X	16849613	X-DeNovo	G	A	100	PASS	PH=none;FEX=PASS;FS=25/25;RN=NODE_CB3475_trim_bwaMEM_sort_modif.bam.generator.V2_3447_L452_D10:4:3::MH0;MQ=60;cigar=452M;SB=0.571429;AS=2-1;CVT=X;HD=12_12_13_13_13_13_13_13_13_13_13_12_12_12_12_13_13_13_14_14_12_12_12_11_11_;AO=11;VT=X	GT:DP:RO:AO	0/1:35:24:11	0/0:13:13:0	0/0:39:39:0	HOM
X	16974403	X-DeNovo	G	A	100	PASS	PH=none;FEX=PASS;FS=25/25;RN=NODE_CB3475_trim_bwaMEM_sort_modif.bam.generator.V2_3449_L305_D14:3:5::MH0;MQ=60;cigar=305M;SB=0.375;AS=2-1;CVT=X;HD=17_17_18_18_18_18_18_18_18_18_18_18_18_18_18_18_18_18_19_19_19_18_18_16_16_;AO=16;VT=X	GT:DP:RO:AO	1/1:16:0:16	0/0:8:8:0	0/0:24:24:0	HOM
X	16979406	X-DeNovo	C	T	100	PASS	PH=PHASED-17-N2_SV_trim_bwaMEM_sort_modif.bam;FEX=PASS;FS=25/25;RN=NODE_CB3475_trim_bwaMEM_sort_modif.bam.generator.V2_3451_L385_D14:5:3::MH0;MQ=60;cigar=385M;SB=0.625;AS=2-1;CVT=X;HD=15_15_15_15_14_14_16_16_16_16_16_16_18_18_18_18_18_18_18_20_20_20_20_20_20_;AO=14;VT=X	GT:DP:RO:AO	1/1:14:0:14	0/0:9:9:0	0/0:17:17:0	HOM
X	17011832	X-DeNovo	G	A	100	PASS	PH=none;FEX=PASS;FS=25/25;RN=NODE_CB3475_trim_bwaMEM_sort_modif.bam.generator.V2_3453_L374_D11:3:4::MH0;MQ=60;cigar=374M;SB=0.428571;AS=2-1;CVT=X;HD=12_12_12_12_11_11_10_10_10_10_10_10_10_10_9_9_9_9_9_9_9_9_9_9_9_;AO=9;VT=X	GT:DP:RO:AO	1/1:9:0:9	0/0:14:14:0	0/0:38:38:0	HOM
X	17242622	X-DeNovo	A	T	104	PASS	PH=none;FEX=PASS;FS=26/25;RN=NODE_CB3475_trim_bwaMEM_sort_modif.bam.generator.V2_3457_L603_D26:11:8::MH0;MQ=60;cigar=303S300M;SB=0.578947;AS=3-2;CVT=X;HD=28_28_28_28_28_28_28_28_28_28_27_27_27_26_26_27_27_26_26_28_27_27_27_27_26_;AO=26;VT=X	GT:DP:RO:AO	0/1:54:28:26	0/0:8:8:0	0/0:37:37:0	HET
X	17284922	X-DeNovo	C	G	100	PASS	PH=PHASED-25-N2_SV_trim_bwaMEM_sort_modif.bam;FEX=PASS;FS=25/25;RN=NODE_CB3475_trim_bwaMEM_sort_modif.bam.generator.V2_3460_L385_D14:3:4::MH0;MQ=38;cigar=385M;SB=0.428571;AS=2-1;CVT=X;HD=19_19_19_19_19_19_18_18_17_17_17_17_17_17_19_19_19_19_19_19_19_19_20_20_20_;AO=17;VT=X	GT:DP:RO:AO	0/1:32:15:17	0/0:20:20:0	0/0:68:68:0	HET

## Sheet: Supplemental_Table_S8
RUFUS calls in KR1876 genome
#CHROM	POS	ID	REF	ALT	QUAL	FILTER	INFO	FORMAT	./KR1876_Het_trim_bwaMEM_sort_modif.bam	N2_SV_trim_bwaMEM_sort_modif.bam	Havaiian_SV_trim_bwaMEM_sort_modif.bam
I	399694	X-DeNovo	T	C	100	PASS	PH=PHASED-67-N2_SV_trim_bwaMEM_sort_modif.bam;FEX=PASS;FS=25/25;RN=NODE_KR1876_Het_trim_bwaMEM_sort_modif.bam.generator.V2_14_L599_D15:6:9::MH0;MQ=60;cigar=599M;SB=0.4;AS=2-1;CVT=X;HD=16_16_16_16_16_16_17_17_17_17_17_17_17_17_17_17_17_17_16_16_17_17_17_17_17_;AO=16;VT=X	GT:DP:RO:AO	0/1:21:5:16	0/0:11:11:0	0/0:17:17:0
I	1040093	X-DeNovo	T	A	100	PASS	PH=PHASED-34-N2_SV_trim_bwaMEM_sort_modif.bam;FEX=PASS;FS=8/8;RN=NODE_KR1876_Het_trim_bwaMEM_sort_modif.bam.generator.V2_70_L400_D7:3:1::MH0;MQ=60;cigar=400M;SB=0.75;AS=2-1;CVT=X;HD=16_17_18_18_18_19_19_18_;AO=16;VT=X	GT:DP:RO:AO	1/1:16:0:16	0/0:8:8:0	.:0:0:0
I	1403115	1067Y-DeNovo	A	<DUP>	87.5	PASS	SVTYPE=DUP;END=1404183;SVLEN=1067;PH=none;FEX=Pass;FS=21/24;RN=NODE_KR1876_Het_trim_bwaMEM_sort_modif.bam.generator.V2_111_L620_D22:12:7::MH0;MQ=60_and_60;cigar=327S293M_and_330M290S;SB=0.631579;AS=2-2_and_1-2	GT:DP:RO:AO	0/1:34:16:18	0/0:8:8:0	0/0:24:24:0
I	1500656	16D-DeNovo	ACTGATTTTGTTGTAAT	A	96	PASS	PH=PHASED-52-N2_SV_trim_bwaMEM_sort_modif.bam;FEX=PASS;FS=24/25;RN=NODE_KR1876_Het_trim_bwaMEM_sort_modif.bam.generator.V2_120_L686_D14:7:6::MH0;MQ=60;cigar=449M16D237M;SB=0.538462;AS=4-3;CVT=16D;HD=14_13_13_13_13_14_14_14_15_15_15_15_15_15_14_14_14_14_13_13_14_13_14_14_-1_-1_-1_-1_-1_-1_-1_-1_-1_-1_-1_-1_-1_-1_-1_-1_-1_;AO=13;VT=DDDDDDDDDDDDDDDD	GT:DP:RO:AO	0/1:16:3:13	0/0:7:7:0	0/0:19:19:0
I	1504020	X-DeNovo	G	T	100	PASS	PH=PHASED-38-N2_SV_trim_bwaMEM_sort_modif.bam;FEX=PASS;FS=25/25;RN=NODE_KR1876_Het_trim_bwaMEM_sort_modif.bam.generator.V2_121_L327_D11:5:6::MH0;MQ=60;cigar=327M;SB=0.454545;AS=5-1;CVT=X;HD=17_17_17_17_17_17_17_19_19_19_19_19_19_19_19_19_19_19_19_19_19_19_19_19_19_;AO=17;VT=X	GT:DP:RO:AO	0/1:20:3:17	0/0:8:8:0	0/0:31:31:0
I	1504020	X-DeNovo	G	T	100	PASS	PH=PHASED-45-N2_SV_trim_bwaMEM_sort_modif.bam;FEX=PASS;FS=25/25;RN=NODE_KR1876_Het_trim_bwaMEM_sort_modif.bam.generator.V2_122_L207_D7:3:1::MH0;MQ=60;cigar=207M;SB=0.75;AS=2-1;CVT=X;HD=17_17_17_17_17_17_17_19_19_19_19_19_19_19_19_19_19_19_19_19_19_19_19_19_19_;AO=17;VT=X	GT:DP:RO:AO	0/1:20:3:17	0/0:8:8:0	0/0:31:31:0
I	1709544	6I-DeNovo	G	GAAATAA	100	PASS	PH=PHASED-61-N2_SV_trim_bwaMEM_sort_modif.bam;FEX=PASS;FS=30/30;RN=NODE_KR1876_Het_trim_bwaMEM_sort_modif.bam.generator.V2_137_L585_D20:9:10::MH0;MQ=60;cigar=175M9D1M9I88M6I306M;SB=0.473684;AS=4-7;CVT=6I;HD=19_18_18_18_18_16_17_17_16_17_18_18_18_18_18_19_18_18_18_18_18_17_17_17_17_16_16_16_17_17_-1_;AO=16;VT=IIIIII	GT:DP:RO:AO	0/1:19:3:16	0/0:10:10:0	0/0:26:26:0
I	1746914	X-DeNovo	A	G	76	PASS	PH=ConflictingPHASED-7-16;FEX=PASS;FS=19/25;RN=NODE_KR1876_Het_trim_bwaMEM_sort_modif.bam.generator.V2_145_L448_D15:8:9::MH0;MQ=30;cigar=448M;SB=0.470588;AS=5-1;CVT=X;HD=-1_-1_17_17_17_17_17_16_14_15_-1_-1_15_16_16_16_16_16_16_14_14_14_14_-1_-1_;AO=14;VT=X	GT:DP:RO:AO	0/1:49:35:14	0/0:14:14:0	0/0:22:22:0
I	2466450	X-DeNovo	C	A	95.8333	PASS	PH=none;FEX=PASS;FS=23/24;RN=NODE_KR1876_Het_trim_bwaMEM_sort_modif.bam.generator.V2_208_L373_D12:6:7::MH0;MQ=60;cigar=238M4D5M16I114M;SB=0.461538;AS=4-5;CVT=X;HD=-1_-1_9_9_9_10_12_12_12_12_12_12_12_12_12_12_12_12_12_11_11_10_10_10_10_;AO=9;VT=X	GT:DP:RO:AO	0/1:20:11:9	0/0:7:7:0	0/0:29:29:0
I	2715200	X-DeNovo	G	A	92	PASS	PH=none;FEX=PASS;FS=23/25;RN=NODE_KR1876_Het_trim_bwaMEM_sort_modif.bam.generator.V2_219_L514_D22:14:8::MH0;MQ=60;cigar=514M;SB=0.636364;AS=3-1;CVT=X;HD=22_23_22_22_22_22_22_22_-1_-1_24_24_24_23_23_23_22_21_21_21_20_21_21_21_21_;AO=20;VT=X	GT:DP:RO:AO	1/1:22:2:20	0/0:8:8:0	0/0:38:38:0
I	2818274	3I-DeNovo	A	ACAT	29.1667	PASS	PH=PHASED-25-N2_SV_trim_bwaMEM_sort_modif.bam;FEX=PASS;FS=7/24;RN=NODE_KR1876_Het_trim_bwaMEM_sort_modif.bam.generator.V2_224_L245_D5:3:2::MH0;MQ=60;cigar=121M3I121M;SB=0.6;AS=2-3;CVT=3I;HD=-1_-1_-1_-1_-1_-1_-1_-1_-1_-1_-1_-1_-1_-1_-1_-1_-1_-1_-1_-1_9_9_9_9_9_9_9_-1_;AO=9;VT=III	GT:DP:RO:AO	0/1:33:24:9	0/0:6:6:0	0/0:31:31:0
I	5066337	X-DeNovo	T	A	100	PASS	PH=none;FEX=PASS;FS=25/25;RN=NODE_KR1876_Het_trim_bwaMEM_sort_modif.bam.generator.V2_314_L567_D18:10:6::MH0;MQ=60;cigar=567M;SB=0.625;AS=2-1;CVT=X;HD=18_18_19_19_19_19_19_18_17_17_17_17_18_17_17_18_18_18_18_18_18_18_18_18_18_;AO=17;VT=X	GT:DP:RO:AO	0/1:23:6:17	0/0:18:18:0	0/0:32:32:0
I	7231393	X-DeNovo	C	T	100	PASS	PH=none;FEX=PASS;FS=25/25;RN=NODE_KR1876_Het_trim_bwaMEM_sort_modif.bam.generator.V2_325_L718_D27:10:13::MH0;MQ=60;cigar=718M;SB=0.434783;AS=3-1;CVT=X;HD=21_21_21_21_22_22_23_23_23_23_23_23_23_24_24_24_24_24_24_24_24_24_24_24_24_;AO=21;VT=X	GT:DP:RO:AO	1/1:21:0:21	0/0:15:15:0	0/0:32:32:0
I	7293235	X-DeNovo	C	T	100	PASS	PH=none;FEX=PASS;FS=25/25;RN=NODE_KR1876_Het_trim_bwaMEM_sort_modif.bam.generator.V2_327_L548_D20:7:13::MH0;MQ=60;cigar=548M;SB=0.35;AS=2-1;CVT=X;HD=20_20_20_20_20_19_17_16_15_15_15_15_15_16_16_16_16_17_16_17_16_16_16_15_15_;AO=15;VT=X	GT:DP:RO:AO	1/1:15:0:15	0/0:9:9:0	0/0:21:21:0
I	8035114	X-DeNovo	C	T	100	PASS	PH=none;FEX=PASS;FS=25/25;RN=NODE_KR1876_Het_trim_bwaMEM_sort_modif.bam.generator.V2_335_L568_D30:14:16::MH0;MQ=60;cigar=568M;SB=0.466667;AS=2-1;CVT=X;HD=25_25_26_28_28_29_29_29_28_28_28_28_28_28_28_28_28_28_28_28_28_28_28_30_30_;AO=25;VT=X	GT:DP:RO:AO	1/1:25:0:25	0/0:9:9:0	0/0:36:36:0
I	8119126	X-DeNovo	G	T	100	PASS	PH=PHASED-42-N2_SV_trim_bwaMEM_sort_modif.bam;FEX=PASS;FS=25/25;RN=NODE_KR1876_Het_trim_bwaMEM_sort_modif.bam.generator.V2_337_L756_D27:14:13::MH0;MQ=60;cigar=756M;SB=0.518519;AS=2-1;CVT=X;HD=28_27_26_24_24_24_24_24_24_24_24_23_22_21_21_22_22_21_21_21_20_19_16_16_16_;AO=16;VT=X	GT:DP:RO:AO	1/1:16:0:16	0/0:10:10:0	0/0:23:23:0
I	9947394	I-DeNovo	G	GA	100	PASS	PH=ConflictingPHASED-12-12;FEX=PASS;FS=16/16;RN=NODE_KR1876_Het_trim_bwaMEM_sort_modif.bam.generator.V2_358_L736_D29:16:12::MH0;MQ=60;cigar=291M1I444M;SB=0.571429;AS=2-3;CVT=I;HD=-1_-1_-1_-1_-1_-1_-1_-1_-1_30_30_30_29_26_25_26_25_25_25_24_24_24_25_25_26_-1_;AO=24;VT=I	GT:DP:RO:AO	1/1:24:0:24	0/0:9:9:0	0/0:26:26:0
I	10858138	X-DeNovo	G	T	64	PASS	PH=none;FEX=PASS;FS=16/25;RN=NODE_KR1876_Het_trim_bwaMEM_sort_modif.bam.generator.V2_370_L651_D33:16:17::MH0;MQ=60;cigar=651M;SB=0.484848;AS=3-1;CVT=X;HD=33_33_35_35_35_35_33_33_32_32_32_32_32_32_33_33_-1_-1_-1_-1_-1_-1_-1_-1_-1_;AO=32;VT=X	GT:DP:RO:AO	0/1:70:38:32	0/0:31:31:0	0/0:181:181:0
I	11226104	II21341Y-DeNovo	G	AC<DUP>	100	PASS	SVTYPE=DUP;END=11247446;SVLEN=21341;PH=PHASED-25-N2_SV_trim_bwaMEM_sort_modif.bam;FEX=Pass;FS=24/24;RN=NODE_KR1876_Het_trim_bwaMEM_sort_modif.bam.generator.V2_381_L803_D20:10:10::MH0;MQ=60_and_60;cigar=449S354M_and_447M356S;SB=0.5;AS=2-2_and_1-2	GT:DP:RO:AO	0/1:39:20:19	0/0:6:6:0	0/0:25:25:0
I	11583127	X-DeNovo	G	A	100	PASS	PH=PHASED-4-Havaiian_SV_trim_bwaMEM_sort_modif.bam;FEX=PASS;FS=25/25;RN=NODE_KR1876_Het_trim_bwaMEM_sort_modif.bam.generator.V2_402_L443_D18:9:8::MH0;MQ=60;cigar=443M;SB=0.529412;AS=2-1;CVT=X;HD=23_22_21_21_20_20_20_19_19_20_21_21_22_22_22_23_21_21_21_21_22_20_20_20_19_;AO=19;VT=X	GT:DP:RO:AO	1/1:19:0:19	0/0:7:7:0	0/0:31:31:0
I	11929379	X-DeNovo	G	A	100	PASS	PH=PHASED-15-N2_SV_trim_bwaMEM_sort_modif.bam;FEX=PASS;FS=25/25;RN=NODE_KR1876_Het_trim_bwaMEM_sort_modif.bam.generator.V2_433_L447_D21:8:12::MH0;MQ=60;cigar=447M;SB=0.4;AS=2-1;CVT=X;HD=18_17_17_18_18_18_20_20_20_20_20_19_19_19_18_18_17_17_17_17_19_19_21_21_22_;AO=17;VT=X	GT:DP:RO:AO	1/1:17:0:17	0/0:14:14:0	0/0:25:25:0
I	11942488	X-DeNovo	G	A	100	PASS	PH=PHASED-130-N2_SV_trim_bwaMEM_sort_modif.bam;FEX=PASS;FS=25/25;RN=NODE_KR1876_Het_trim_bwaMEM_sort_modif.bam.generator.V2_435_L514_D30:18:9::MH0;MQ=60;cigar=514M;SB=0.666667;AS=3-1;CVT=X;HD=28_29_29_28_28_28_28_27_27_27_27_26_26_24_24_23_23_23_23_23_22_21_20_20_20_;AO=20;VT=X	GT:DP:RO:AO	0/1:54:34:20	0/0:10:10:0	0/0:26:26:0
I	12760980	X-DeNovo	G	A	100	PASS	PH=PHASED-250-N2_SV_trim_bwaMEM_sort_modif.bam;FEX=PASS;FS=25/25;RN=NODE_KR1876_Het_trim_bwaMEM_sort_modif.bam.generator.V2_467_L805_D28:8:17::MH0;MQ=60;cigar=805M;SB=0.32;AS=4-1;CVT=X;HD=28_28_28_28_26_26_26_27_27_27_28_29_29_29_29_28_29_29_29_28_28_28_27_26_26_;AO=26;VT=X	GT:DP:RO:AO	1/1:26:0:26	0/0:14:14:0	0/0:31:31:0
I	13174506	X-DeNovo	G	A	100	PASS	PH=none;FEX=PASS;FS=25/25;RN=NODE_KR1876_Het_trim_bwaMEM_sort_modif.bam.generator.V2_485_L612_D21:10:11::MH0;MQ=60;cigar=612M;SB=0.47619;AS=2-1;CVT=X;HD=22_22_22_22_22_22_22_23_22_22_22_23_23_23_23_20_21_21_21_21_20_20_20_20_20_;AO=20;VT=X	GT:DP:RO:AO	1/1:20:0:20	0/0:8:8:0	0/0:36:36:0
I	13552134	X-DeNovo	G	A	100	PASS	PH=PHASED-20-N2_SV_trim_bwaMEM_sort_modif.bam;FEX=PASS;FS=25/25;RN=NODE_KR1876_Het_trim_bwaMEM_sort_modif.bam.generator.V2_500_L667_D25:13:12::MH0;MQ=60;cigar=667M;SB=0.52;AS=2-1;CVT=X;HD=22_22_22_22_23_23_23_23_20_20_19_19_20_19_20_20_19_17_17_17_17_18_18_18_18_;AO=17;VT=X	GT:DP:RO:AO	1/1:17:0:17	0/0:9:9:0	0/0:36:36:0
I	14188656	X-DeNovo	G	A	100	PASS	PH=PHASED-50-N2_SV_trim_bwaMEM_sort_modif.bam;FEX=PASS;FS=25/25;RN=NODE_KR1876_Het_trim_bwaMEM_sort_modif.bam.generator.V2_529_L617_D24:11:13::MH0;MQ=60;cigar=617M;SB=0.458333;AS=2-1;CVT=X;HD=27_27_27_28_28_27_27_27_26_26_26_26_26_26_26_25_24_24_24_23_24_25_25_25_25_;AO=23;VT=X	GT:DP:RO:AO	1/1:23:0:23	0/0:10:10:0	0/0:17:17:0
II	234195	X-DeNovo	T	C	96	PASS	PH=none;FEX=PASS;FS=24/25;RN=NODE_KR1876_Het_trim_bwaMEM_sort_modif.bam.generator.V2_578_L468_D14:7:5::MH0;MQ=60;cigar=468M;SB=0.583333;AS=2-1;CVT=X;HD=14_14_14_14_14_14_14_14_14_14_13_14_-1_13_13_12_13_12_12_12_12_12_12_12_12_;AO=12;VT=X	GT:DP:RO:AO	0/1:33:21:12	0/0:13:13:0	0/0:63:63:0
II	245347	X-DeNovo	A	G	100	PASS	PH=none;FEX=PASS;FS=25/25;RN=NODE_KR1876_Het_trim_bwaMEM_sort_modif.bam.generator.V2_579_L382_D18:9:9::MH0;MQ=60;cigar=382M;SB=0.5;AS=2-1;CVT=X;HD=11_12_12_13_13_14_14_14_14_14_14_15_15_17_17_17_17_17_16_16_16_18_18_18_17_;AO=11;VT=X	GT:DP:RO:AO	1/1:11:0:11	0/0:12:12:0	0/0:24:24:0
II	627437	8D-DeNovo	GGCTGAGTA	G	95.6522	PASS	PH=PHASED-1-Havaiian_SV_trim_bwaMEM_sort_modif.bam;FEX=PASS;FS=22/23;RN=NODE_KR1876_Het_trim_bwaMEM_sort_modif.bam.generator.V2_590_L684_D18:8:10::MH0;MQ=60;cigar=307M8D377M;SB=0.444444;AS=2-3;CVT=8D;HD=-1_-1_19_19_19_19_19_20_19_19_18_18_18_18_19_19_19_19_19_19_19_19_18_18_-1_-1_-1_-1_-1_-1_-1_-1_-1_;AO=18;VT=DDDDDDDD	GT:DP:RO:AO	1/1:18:0:18	0/0:17:17:0	0/0:35:35:0
II	696584	X-DeNovo	C	A	4	PASS	PH=PHASED-7-N2_SV_trim_bwaMEM_sort_modif.bam;FEX=PASS;FS=1/25;RN=NODE_KR1876_Het_trim_bwaMEM_sort_modif.bam.generator.V2_595_L272_D9:3:4::MH0;MQ=4;cigar=267M5S;SB=0.428571;AS=10-2;CVT=X;HD=-1_-1_13_-1_-1_-1_-1_-1_-1_-1_-1_-1_-1_-1_-1_-1_-1_-1_-1_-1_-1_-1_-1_-1_-1_;AO=13;VT=X	GT:DP:RO:AO	1/1:15:2:13	0/0:3:3:0	0/0:5:5:0
II	778938	X-DeNovo	T	A	44	PASS	PH=ConflictingPHASED-6-34;FEX=PASS;FS=11/25;RN=NODE_KR1876_Het_trim_bwaMEM_sort_modif.bam.generator.V2_599_L336_D16:5:7::MH0;MQ=60;cigar=336M;SB=0.416667;AS=2-1;CVT=X;HD=-1_-1_-1_-1_-1_-1_14_14_13_13_13_12_12_12_12_12_12_-1_-1_-1_-1_-1_-1_-1_-1_;AO=12;VT=X	GT:DP:RO:AO	0/1:47:35:12	0/0:29:29:0	0/0:39:39:0
II	1064268	X-DeNovo	T	A	100	PASS	PH=PHASED-333-N2_SV_trim_bwaMEM_sort_modif.bam;FEX=PASS;FS=25/25;RN=NODE_KR1876_Het_trim_bwaMEM_sort_modif.bam.generator.V2_611_L628_D23:8:15::MH0;MQ=60;cigar=628M;SB=0.347826;AS=2-1;CVT=X;HD=29_28_29_28_28_28_26_26_25_24_23_23_23_23_23_22_22_22_23_22_22_22_21_21_21_;AO=21;VT=X	GT:DP:RO:AO	1/1:21:0:21	0/0:10:10:0	.:0:0:0
II	1137283	X-DeNovo	C	T	100	PASS	PH=PHASED-18-N2_SV_trim_bwaMEM_sort_modif.bam;FEX=PASS;FS=25/25;RN=NODE_KR1876_Het_trim_bwaMEM_sort_modif.bam.generator.V2_615_L281_D12:7:3::MH0;MQ=60;cigar=281M;SB=0.7;AS=2-1;CVT=X;HD=12_12_13_13_13_12_12_12_12_12_13_13_13_13_13_13_13_13_13_14_15_15_15_15_15_;AO=12;VT=X	GT:DP:RO:AO	0/1:25:13:12	0/0:24:24:0	0/0:48:48:0
II	1167626	X-DeNovo	C	T	100	PASS	PH=PHASED-34-N2_SV_trim_bwaMEM_sort_modif.bam;FEX=PASS;FS=25/25;RN=NODE_KR1876_Het_trim_bwaMEM_sort_modif.bam.generator.V2_617_L475_D21:11:9::MH0;MQ=60;cigar=475M;SB=0.55;AS=2-1;CVT=X;HD=18_19_18_17_17_18_19_19_19_20_20_20_19_19_19_19_18_17_16_16_16_16_17_17_17_;AO=16;VT=X	GT:DP:RO:AO	0/1:36:20:16	0/0:9:9:0	0/0:28:28:0
II	1254025	X-DeNovo	C	A	100	PASS	PH=PHASED-78-N2_SV_trim_bwaMEM_sort_modif.bam;FEX=PASS;FS=25/25;RN=NODE_KR1876_Het_trim_bwaMEM_sort_modif.bam.generator.V2_622_L577_D17:10:7::MH0;MQ=60;cigar=577M;SB=0.588235;AS=2-1;CVT=X;HD=17_17_17_17_17_17_17_16_16_16_16_16_15_14_13_12_12_12_12_15_16_16_16_17_16_;AO=12;VT=X	GT:DP:RO:AO	1/1:12:0:12	0/0:13:13:0	0/0:26:26:0
II	1952998	4D-DeNovo	GGCCC	G	91.3043	PASS	PH=PHASED-16-N2_SV_trim_bwaMEM_sort_modif.bam;FEX=PASS;FS=21/23;RN=NODE_KR1876_Het_trim_bwaMEM_sort_modif.bam.generator.V2_684_L664_D30:13:16::MH0;MQ=60;cigar=349M4D315M;SB=0.448276;AS=2-3;CVT=4D;HD=-1_-1_-1_27_27_27_26_26_27_25_26_27_27_27_27_27_27_25_25_25_25_25_25_27_-1_-1_-1_-1_-1_;AO=25;VT=DDDD	GT:DP:RO:AO	0/1:60:35:25	0/0:10:10:0	0/0:31:31:0
II	2161355	X-DeNovo	G	C	100	PASS	PH=PHASED-257-N2_SV_trim_bwaMEM_sort_modif.bam;FEX=PASS;FS=25/25;RN=NODE_KR1876_Het_trim_bwaMEM_sort_modif.bam.generator.V2_705_L717_D36:19:17::MH0;MQ=60;cigar=717M;SB=0.527778;AS=2-1;CVT=X;HD=30_30_30_30_31_33_33_34_34_35_35_36_36_37_37_37_37_37_37_39_39_39_39_39_38_;AO=30;VT=X	GT:DP:RO:AO	0/1:49:19:30	0/0:21:21:0	0/0:24:24:0
II	2344699	X-DeNovo	C	A	92	PASS	PH=PHASED-45-N2_SV_trim_bwaMEM_sort_modif.bam;FEX=PASS;FS=23/25;RN=NODE_KR1876_Het_trim_bwaMEM_sort_modif.bam.generator.V2_739_L465_D20:6:12::MH0;MQ=60;cigar=465M;SB=0.333333;AS=2-1;CVT=X;HD=-1_-1_20_20_18_18_18_18_18_19_19_19_20_22_22_22_22_22_21_20_19_19_21_21_21_;AO=18;VT=X	GT:DP:RO:AO	0/1:46:28:18	0/0:8:8:0	0/0:33:33:0
II	3680358	X-DeNovo	A	C	100	PASS	PH=PHASED-500-N2_SV_trim_bwaMEM_sort_modif.bam;FEX=PASS;FS=25/25;RN=NODE_KR1876_Het_trim_bwaMEM_sort_modif.bam.generator.V2_842_L636_D24:10:13::MH0;MQ=60;cigar=636M;SB=0.434783;AS=2-1;CVT=X;HD=22_23_23_24_25_24_24_24_24_24_24_25_22_24_25_25_24_24_24_24_22_22_22_22_23_;AO=22;VT=X	GT:DP:RO:AO	1/1:22:0:22	0/0:10:10:0	0/0:43:43:0
II	3801003	X-DeNovo	C	A	100	PASS	PH=PHASED-50-N2_SV_trim_bwaMEM_sort_modif.bam;FEX=PASS;FS=25/25;RN=NODE_KR1876_Het_trim_bwaMEM_sort_modif.bam.generator.V2_849_L661_D27:15:12::MH0;MQ=60;cigar=661M;SB=0.555556;AS=2-1;CVT=X;HD=25_25_25_26_26_27_27_27_26_24_25_25_25_25_26_26_26_26_27_26_27_27_28_29_28_;AO=24;VT=X	GT:DP:RO:AO	1/1:24:0:24	0/0:17:17:0	0/0:40:40:0
II	5566785	X-DeNovo	C	T	100	PASS	PH=PHASED-21-N2_SV_trim_bwaMEM_sort_modif.bam;FEX=PASS;FS=25/25;RN=NODE_KR1876_Het_trim_bwaMEM_sort_modif.bam.generator.V2_889_L453_D25:13:8::MH0;MQ=4;cigar=453M;SB=0.619048;AS=2-1;CVT=X;HD=19_19_19_19_19_19_19_18_18_20_20_21_20_20_19_19_20_21_22_22_21_20_20_20_19_;AO=18;VT=X	GT:DP:RO:AO	0/1:64:46:18	0/0:30:30:0	0/0:62:62:0
II	6077684	D-DeNovo	CT	C	93.75	PASS	PH=none;FEX=PASS;FS=15/16;RN=NODE_KR1876_Het_trim_bwaMEM_sort_modif.bam.generator.V2_896_L756_D25:10:14::MH0;MQ=60;cigar=430M1D326M;SB=0.416667;AS=2-3;CVT=D;HD=-1_-1_-1_-1_-1_-1_-1_-1_-1_31_31_30_30_29_27_29_30_30_30_30_30_29_26_26_-1_-1_;AO=26;VT=D	GT:DP:RO:AO	1/1:26:0:26	0/0:8:8:0	0/0:24:24:0
II	7877045	X-DeNovo	C	T	100	PASS	PH=none;FEX=PASS;FS=25/25;RN=NODE_KR1876_Het_trim_bwaMEM_sort_modif.bam.generator.V2_917_L526_D33:16:16::MH0;MQ=60;cigar=526M;SB=0.5;AS=2-1;CVT=X;HD=32_33_33_33_32_32_32_33_32_34_34_34_33_32_32_32_31_30_30_30_29_29_28_28_28_;AO=28;VT=X	GT:DP:RO:AO	1/1:28:0:28	0/0:14:14:0	0/0:30:30:0
II	8048303	X-DeNovo	T	A	100	PASS	PH=PHASED-25-N2_SV_trim_bwaMEM_sort_modif.bam;FEX=PASS;FS=25/25;RN=NODE_KR1876_Het_trim_bwaMEM_sort_modif.bam.generator.V2_921_L608_D35:18:16::MH0;MQ=60;cigar=608M;SB=0.529412;AS=2-1;CVT=X;HD=35_35_35_36_35_35_34_34_34_34_35_35_35_35_34_34_35_35_35_35_33_34_34_34_33_;AO=33;VT=X	GT:DP:RO:AO	1/1:33:0:33	0/0:13:13:0	0/0:47:47:0
II	8598940	DD-DeNovo	ATC	A	95.8333	PASS	PH=PHASED-20-N2_SV_trim_bwaMEM_sort_modif.bam;FEX=PASS;FS=23/24;RN=NODE_KR1876_Het_trim_bwaMEM_sort_modif.bam.generator.V2_925_L561_D17:8:8::MH0;MQ=60;cigar=286M2D275M;SB=0.5;AS=2-3;CVT=DD;HD=-1_17_17_17_17_17_17_18_18_18_18_18_17_17_16_16_15_15_15_15_15_15_16_16_-1_-1_-1_;AO=15;VT=DD	GT:DP:RO:AO	1/1:15:0:15	0/0:9:9:0	0/0:27:27:0
II	8806919	X-DeNovo	G	T	100	PASS	PH=PHASED-25-N2_SV_trim_bwaMEM_sort_modif.bam;FEX=PASS;FS=25/25;RN=NODE_KR1876_Het_trim_bwaMEM_sort_modif.bam.generator.V2_928_L626_D25:13:9::MH0;MQ=60;cigar=626M;SB=0.590909;AS=3-1;CVT=X;HD=24_23_23_23_24_23_22_23_23_23_22_22_24_25_25_27_27_28_28_28_28_29_29_28_28_;AO=22;VT=X	GT:DP:RO:AO	1/1:22:0:22	0/0:14:14:0	0/0:35:35:0
II	9942457	X-DeNovo	G	T	100	PASS	PH=none;FEX=PASS;FS=25/25;RN=NODE_KR1876_Het_trim_bwaMEM_sort_modif.bam.generator.V2_934_L736_D28:14:13::MH0;MQ=60;cigar=736M;SB=0.518519;AS=5-1;CVT=X;HD=28_27_27_29_29_29_29_28_29_30_30_29_29_29_28_28_27_28_28_28_27_27_27_27_27_;AO=27;VT=X	GT:DP:RO:AO	1/1:27:0:27	0/0:13:13:0	0/0:27:27:0
II	10440530	30D-DeNovo	ACATTGTGAACCACGAGAATGGACACAAGAA	A	84	PASS	PH=PHASED-25-N2_SV_trim_bwaMEM_sort_modif.bam;FEX=PASS;FS=21/25;RN=NODE_KR1876_Het_trim_bwaMEM_sort_modif.bam.generator.V2_940_L460_D14:9:5::MH0;MQ=60;cigar=158M302S;SB=0.642857;AS=1-2;CVT=30D;HD=15_16_16_16_16_16_15_16_16_16_16_15_16_17_17_16_16_16_17_17_17_-1_-1_-1_-1_-1_-1_-1_-1_-1_-1_-1_-1_-1_-1_-1_-1_-1_-1_-1_-1_-1_-1_-1_-1_-1_-1_-1_-1_-1_-1_-1_-1_-1_-1_;AO=15;VT=DDDDDDDDDDDDDDDDDDDDDDDDDDDD…	GT:DP:RO:AO	0/1:33:18:15	0/0:9:9:0	0/0:29:29:0
II	12474307	X-DeNovo	T	A	100	PASS	PH=PHASED-52-N2_SV_trim_bwaMEM_sort_modif.bam;FEX=PASS;FS=25/25;RN=NODE_KR1876_Het_trim_bwaMEM_sort_modif.bam.generator.V2_989_L602_D16:8:8::MH0;MQ=60;cigar=602M;SB=0.5;AS=2-1;CVT=X;HD=16_16_16_17_17_17_17_16_16_16_16_16_16_15_16_15_16_16_16_17_17_17_17_17_18_;AO=15;VT=X	GT:DP:RO:AO	1/1:15:0:15	0/0:12:12:0	0/0:32:32:0
II	12613130	X-DeNovo	C	T	36	PASS	PH=ConflictingPHASED-17-258;FEX=PASS;FS=9/25;RN=NODE_KR1876_Het_trim_bwaMEM_sort_modif.bam.generator.V2_1003_L1051_D30:16:32::MH0;MQ=60;cigar=1051M;SB=0.333333;AS=2-1;CVT=X;HD=26_26_26_24_25_25_26_26_26_-1_-1_-1_-1_-1_-1_-1_-1_-1_-1_-1_-1_-1_-1_-1_-1_;AO=24;VT=X	GT:DP:RO:AO	0/1:66:42:24	0/0:17:17:0	0/0:93:93:0
II	13043141	X-DeNovo	C	A	100	PASS	PH=PHASED-49-N2_SV_trim_bwaMEM_sort_modif.bam;FEX=PASS;FS=25/25;RN=NODE_KR1876_Het_trim_bwaMEM_sort_modif.bam.generator.V2_1032_L845_D23:15:20::MH0;MQ=60;cigar=845M;SB=0.428571;AS=3-1;CVT=X;HD=25_24_24_24_24_24_24_24_23_23_23_24_24_24_25_25_25_25_25_25_25_25_25_25_23_;AO=23;VT=X	GT:DP:RO:AO	0/1:42:19:23	0/0:13:13:0	0/0:60:60:0
II	13043312	X-DeNovo	C	T	100	PASS	PH=PHASED-49-N2_SV_trim_bwaMEM_sort_modif.bam;FEX=PASS;FS=25/25;RN=NODE_KR1876_Het_trim_bwaMEM_sort_modif.bam.generator.V2_1032_L845_D23:15:20::MH0;MQ=60;cigar=845M;SB=0.428571;AS=3-1;CVT=X;HD=14_14_13_13_13_13_13_13_13_14_14_13_13_13_12_12_12_12_12_12_12_13_13_13_13_;AO=12;VT=X	GT:DP:RO:AO	0/1:32:20:12	0/0:19:19:0	0/0:27:27:0
II	13083792	X-DeNovo	A	T	100	PASS	PH=PHASED-25-N2_SV_trim_bwaMEM_sort_modif.bam;FEX=PASS;FS=25/25;RN=NODE_KR1876_Het_trim_bwaMEM_sort_modif.bam.generator.V2_1038_L722_D29:14:13::MH0;MQ=60;cigar=722M;SB=0.518519;AS=3-1;CVT=X;HD=24_24_24_24_24_25_26_26_26_26_25_25_25_25_25_26_26_26_26_26_27_29_29_29_29_;AO=24;VT=X	GT:DP:RO:AO	1/1:24:0:24	0/0:9:9:0	0/0:33:33:0
II	13518717	I-DeNovo	G	GT	5.55556	PASS	PH=none;FEX=PASS;FS=1/18;RN=NODE_KR1876_Het_trim_bwaMEM_sort_modif.bam.generator.V2_1077_L257_D5:2:2::MH0;MQ=60;cigar=115M1I141M;SB=0.5;AS=2-3;CVT=I;HD=-1_-1_-1_-1_-1_-1_-1_-1_-1_-1_-1_-1_-1_-1_-1_-1_-1_-1_-1_-1_-1_-1_-1_9_-1_-1_;AO=9;VT=I	GT:DP:RO:AO	1/1:9:0:9	0/0:10:10:0	0/0:32:32:0
III	2999056	62D-DeNovo	ATTTTCATTTTTGGGAAATTGCCGGAAATTTTCAATTCTGGCAATTTGCAGATTTGCCGGAAA	A	40	PASS	PH=PHASED-1-N2_SV_trim_bwaMEM_sort_modif.bam;FEX=PASS;FS=10/25;RN=NODE_KR1876_Het_trim_bwaMEM_sort_modif.bam.generator.V2_1394_L541_D13:6:6::MH0;MQ=60;cigar=253M288S;SB=0.5;AS=2-2;CVT=62D;HD=19_19_19_19_19_19_20_21_21_-1_21_-1_-1_-1_-1_-1_-1_-1_-1_-1_-1_-1_-1_-1_-1_-1_-1_-1_-1_-1_-1_-1_-1_-1_-1_-1_-1_-1_-1_-1_-1_-1_-1_-1_-1_-1_-1_-1_-1_-1_-1_-1_-1_-1_-1_-1_-1_-1_-1_-1_-1_-1_-1_-1_-1_-1_-1_-1_-1_-…	GT:DP:RO:AO	1/1:22:3:19	0/0:9:9:0	0/0:23:23:0
III	3402346	X-DeNovo	G	A	100	PASS	PH=PHASED-25-N2_SV_trim_bwaMEM_sort_modif.bam;FEX=PASS;FS=25/25;RN=NODE_KR1876_Het_trim_bwaMEM_sort_modif.bam.generator.V2_1410_L651_D25:15:9::MH0;MQ=60;cigar=651M;SB=0.625;AS=4-1;CVT=X;HD=18_19_21_22_23_23_23_22_22_21_20_21_20_20_20_20_20_20_20_20_20_21_21_22_22_;AO=18;VT=X	GT:DP:RO:AO	1/1:18:0:18	0/0:15:15:0	0/0:35:35:0
III	5884414	X-DeNovo	T	G	100	PASS	PH=none;FEX=PASS;FS=25/25;RN=NODE_KR1876_Het_trim_bwaMEM_sort_modif.bam.generator.V2_1432_L716_D31:13:16::MH0;MQ=60;cigar=716M;SB=0.448276;AS=2-1;CVT=X;HD=29_29_29_30_29_29_28_27_27_28_28_28_28_28_28_28_28_28_29_28_27_25_24_24_25_;AO=24;VT=X	GT:DP:RO:AO	1/1:24:0:24	0/0:10:10:0	0/0:36:36:0
III	6217224	X-DeNovo	G	A	100	PASS	PH=none;FEX=PASS;FS=25/25;RN=NODE_KR1876_Het_trim_bwaMEM_sort_modif.bam.generator.V2_1433_L617_D23:9:13::MH0;MQ=60;cigar=617M;SB=0.409091;AS=2-1;CVT=X;HD=17_17_17_18_17_18_18_18_18_17_19_20_20_20_19_19_20_21_21_21_21_21_21_22_22_;AO=17;VT=X	GT:DP:RO:AO	1/1:17:0:17	0/0:14:14:0	0/0:29:29:0
III	6990326	X-DeNovo	T	C	96	PASS	PH=ConflictingPHASED-1-51;FEX=PASS;FS=24/25;RN=NODE_KR1876_Het_trim_bwaMEM_sort_modif.bam.generator.V2_1441_L642_D25:15:9::MH0;MQ=60;cigar=642M;SB=0.625;AS=5-1;CVT=X;HD=21_22_23_23_23_23_24_24_25_25_25_25_25_25_25_25_24_24_23_23_22_22_22_22_-1_;AO=21;VT=X	GT:DP:RO:AO	1/1:21:0:21	0/0:11:11:0	.:0:0:0
III	7540018	X-DeNovo	A	G	100	PASS	PH=none;FEX=PASS;FS=25/25;RN=NODE_KR1876_Het_trim_bwaMEM_sort_modif.bam.generator.V2_1453_L490_D22:12:10::MH0;MQ=60;cigar=490M;SB=0.545455;AS=2-1;CVT=X;HD=18_18_18_18_18_20_20_18_21_21_21_21_22_23_23_23_23_23_23_22_23_23_23_23_23_;AO=18;VT=X	GT:DP:RO:AO	1/1:18:0:18	0/0:9:9:0	0/0:31:31:0
III	9551173	X-DeNovo	T	A	100	PASS	PH=PHASED-25-N2_SV_trim_bwaMEM_sort_modif.bam;FEX=PASS;FS=25/25;RN=NODE_KR1876_Het_trim_bwaMEM_sort_modif.bam.generator.V2_1468_L784_D30:15:14::MH0;MQ=60;cigar=784M;SB=0.517241;AS=2-1;CVT=X;HD=29_30_29_29_30_31_31_31_31_29_29_28_28_28_28_28_27_27_27_27_27_27_27_27_28_;AO=27;VT=X	GT:DP:RO:AO	1/1:27:0:27	0/0:11:11:0	0/0:27:27:0
III	10041550	X-DeNovo	A	C	100	PASS	PH=PHASED-50-N2_SV_trim_bwaMEM_sort_modif.bam;FEX=PASS;FS=25/25;RN=NODE_KR1876_Het_trim_bwaMEM_sort_modif.bam.generator.V2_1473_L587_D37:22:13::MH0;MQ=60;cigar=587M;SB=0.628571;AS=2-1;CVT=X;HD=31_32_32_32_32_32_33_33_33_33_33_33_35_34_34_33_32_32_32_32_32_32_32_32_32_;AO=31;VT=X	GT:DP:RO:AO	1/1:31:0:31	0/0:10:10:0	0/0:34:34:0
III	10311998	X-DeNovo	G	A	100	PASS	PH=none;FEX=PASS;FS=25/25;RN=NODE_KR1876_Het_trim_bwaMEM_sort_modif.bam.generator.V2_1481_L412_D16:5:11::MH0;MQ=60;cigar=412M;SB=0.3125;AS=2-1;CVT=X;HD=15_15_15_15_15_15_17_17_17_17_15_14_14_14_13_13_12_12_12_12_12_12_12_12_12_;AO=12;VT=X	GT:DP:RO:AO	1/1:12:0:12	0/0:9:9:0	0/0:41:41:0
III	10603860	X-DeNovo	T	A	48	PASS	PH=ConflictingPHASED-8-51;FEX=PASS;FS=12/25;RN=NODE_KR1876_Het_trim_bwaMEM_sort_modif.bam.generator.V2_1488_L603_D14:10:5::MH0;MQ=60;cigar=603M;SB=0.666667;AS=9-1;CVT=X;HD=17_17_16_16_15_15_16_14_13_13_13_13_-1_-1_-1_-1_-1_-1_-1_-1_-1_-1_-1_-1_-1_;AO=13;VT=X	GT:DP:RO:AO	0/1:22:9:13	0/0:9:9:0	0/0:28:28:0
III	12843911	X-DeNovo	A	T	100	PASS	PH=PHASED-66-N2_SV_trim_bwaMEM_sort_modif.bam;FEX=PASS;FS=25/25;RN=NODE_KR1876_Het_trim_bwaMEM_sort_modif.bam.generator.V2_1621_L801_D24:10:14::MH0;MQ=60;cigar=801M;SB=0.416667;AS=2-1;CVT=X;HD=28_29_29_29_29_29_28_28_29_28_28_27_27_27_24_23_23_22_23_25_25_25_24_24_24_;AO=22;VT=X	GT:DP:RO:AO	1/1:22:0:22	0/0:9:9:0	0/0:19:19:0
III	12929464	XX-DeNovo	TT	AA	51.8519	PASS	PH=ConflictingPHASED-6-1;FEX=PASS;FS=14/27;RN=NODE_KR1876_Het_trim_bwaMEM_sort_modif.bam.generator.V2_1623_L551_D19:7:12::MH0;MQ=60;cigar=551M;SB=0.368421;AS=4-1;CVT=XX;HD=18_18_18_18_18_18_18_19_19_19_19_-1_20_-1_-1_-1_16_15_-1_-1_-1_-1_-1_-1_-1_-1_-1_;AO=15;VT=XX	GT:DP:RO:AO	0/1:28:13:15	0/0:13:13:0	.:0:0:0
III	13057794	D-DeNovo	AT	A	87.5	PASS	PH=PHASED-372-N2_SV_trim_bwaMEM_sort_modif.bam;FEX=PASS;FS=14/16;RN=NODE_KR1876_Het_trim_bwaMEM_sort_modif.bam.generator.V2_1632_L517_D19:7:12::MH0;MQ=60;cigar=369M1D148M;SB=0.368421;AS=2-3;CVT=D;HD=-1_-1_-1_-1_-1_-1_-1_-1_-1_20_21_21_21_20_-1_19_19_19_18_18_18_19_19_19_-1_-1_;AO=18;VT=D	GT:DP:RO:AO	1/1:18:0:18	0/0:13:13:0	.:0:0:0
III	13094356	X-DeNovo	T	C	24	PASS	PH=PHASED-23-N2_SV_trim_bwaMEM_sort_modif.bam;FEX=PASS;FS=6/25;RN=NODE_KR1876_Het_trim_bwaMEM_sort_modif.bam.generator.V2_1637_L413_D17:6:10::MH0;MQ=60;cigar=413M;SB=0.375;AS=2-1;CVT=X;HD=-1_-1_-1_-1_-1_-1_-1_-1_-1_-1_-1_-1_-1_-1_25_27_27_27_26_27_-1_-1_-1_-1_-1_;AO=25;VT=X	GT:DP:RO:AO	0/1:65:40:25	0/0:19:19:0	0/0:103:103:0
III	13301900	I-DeNovo	C	CA	100	PASS	PH=PHASED-25-N2_SV_trim_bwaMEM_sort_modif.bam;FEX=PASS;FS=16/16;RN=NODE_KR1876_Het_trim_bwaMEM_sort_modif.bam.generator.V2_1641_L555_D16:6:8::MH0;MQ=60;cigar=284M1I270M;SB=0.428571;AS=2-3;CVT=I;HD=-1_-1_-1_-1_-1_-1_-1_-1_-1_19_19_19_20_20_20_19_19_18_17_17_17_17_16_16_15_-1_;AO=15;VT=I	GT:DP:RO:AO	1/1:15:0:15	0/0:8:8:0	0/0:21:21:0
III	13398942	X-DeNovo	C	T	100	PASS	PH=none;FEX=PASS;FS=25/25;RN=NODE_KR1876_Het_trim_bwaMEM_sort_modif.bam.generator.V2_1644_L625_D32:16:16::MH0;MQ=60;cigar=625M;SB=0.5;AS=2-1;CVT=X;HD=34_33_33_33_33_33_33_33_33_33_31_31_31_32_31_30_30_29_29_30_30_27_28_28_28_;AO=27;VT=X	GT:DP:RO:AO	0/1:70:43:27	0/0:9:9:0	0/0:28:28:0
III	13653192	X-DeNovo	T	A	100	PASS	PH=none;FEX=PASS;FS=25/25;RN=NODE_KR1876_Het_trim_bwaMEM_sort_modif.bam.generator.V2_1656_L592_D32:17:14::MH0;MQ=60;cigar=592M;SB=0.548387;AS=2-1;CVT=X;HD=29_30_30_30_30_30_31_28_28_28_29_30_30_30_30_31_31_31_31_30_31_31_31_30_30_;AO=28;VT=X	GT:DP:RO:AO	1/1:28:0:28	0/0:8:8:0	0/0:27:27:0
III	13764069	OrphanBND-LC=0bnd_1-DeNovo	A	[chr1:15072263[A	62.5	PASS	SVTYPE=BND;MATEID=bnd_2;PH=none;FEX=Pass;FS=15/24;RN=NODE_KR1876_Het_trim_bwaMEM_sort_modif.bam.generator.V2_2197_L482_D19:9:7::MH0;MQ=60_and_0;cigar=144S338M_and_333S149M;SB=0.5625;AS=1-2_and_	GT:DP:RO:AO	0/1:34:18:16	0/0:18:18:0	0/0:25:25:0
IV	132154	I-DeNovo	G	GA	100	PASS	PH=none;FEX=PASS;FS=15/15;RN=NODE_KR1876_Het_trim_bwaMEM_sort_modif.bam.generator.V2_1661_L542_D20:7:12::MH0;MQ=60;cigar=293M1I248M;SB=0.368421;AS=2-3;CVT=I;HD=-1_-1_-1_-1_-1_-1_-1_-1_-1_-1_25_25_25_24_23_22_20_19_18_18_17_16_16_16_16_-1_;AO=16;VT=I	GT:DP:RO:AO	1/1:16:0:16	0/0:11:11:0	0/0:40:40:0
IV	335808	D-DeNovo	GT	G	87.5	PASS	PH=none;FEX=PASS;FS=21/24;RN=NODE_KR1876_Het_trim_bwaMEM_sort_modif.bam.generator.V2_1666_L436_D25:12:11::MH0;MQ=59;cigar=219M1D217M;SB=0.521739;AS=2-3;CVT=D;HD=-1_27_27_27_27_27_27_28_28_27_27_27_28_28_28_28_28_28_28_28_27_26_-1_-1_-1_-1_;AO=26;VT=D	GT:DP:RO:AO	0/1:122:96:26	0/0:50:50:0	0/0:196:196:0
IV	440589	D-DeNovo	GA	G	94.7368	PASS	PH=none;FEX=PASS;FS=18/19;RN=NODE_KR1876_Het_trim_bwaMEM_sort_modif.bam.generator.V2_1668_L416_D25:13:11::MH0;MQ=60;cigar=173M1D243M;SB=0.541667;AS=2-3;CVT=D;HD=-1_-1_-1_-1_-1_-1_25_25_24_25_25_25_25_25_25_25_25_25_25_25_25_25_25_25_-1_-1_;AO=24;VT=D	GT:DP:RO:AO	1/1:24:0:24	0/0:13:13:0	0/0:42:42:0
IV	633978	D-DeNovo	GT	G	93.3333	PASS	PH=none;FEX=PASS;FS=14/15;RN=NODE_KR1876_Het_trim_bwaMEM_sort_modif.bam.generator.V2_1673_L691_D20:9:10::MH0;MQ=60;cigar=381M1D310M;SB=0.473684;AS=2-3;CVT=D;HD=-1_-1_-1_-1_-1_-1_-1_-1_-1_-1_28_28_28_28_28_28_28_29_29_27_27_26_25_25_-1_-1_;AO=25;VT=D	GT:DP:RO:AO	1/1:25:0:25	0/0:8:8:0	0/0:26:26:0
IV	713088	X-DeNovo	T	A	100	PASS	PH=none;FEX=PASS;FS=25/25;RN=NODE_KR1876_Het_trim_bwaMEM_sort_modif.bam.generator.V2_1674_L540_D15:8:7::MH0;MQ=60;cigar=540M;SB=0.533333;AS=2-1;CVT=X;HD=18_17_17_17_17_17_17_17_17_17_17_17_17_18_18_19_19_20_19_19_19_19_19_18_20_;AO=17;VT=X	GT:DP:RO:AO	1/1:17:0:17	0/0:10:10:0	0/0:30:30:0
IV	1223234	D-DeNovo	AT	A	86.6667	PASS	PH=PHASED-4-Havaiian_SV_trim_bwaMEM_sort_modif.bam;FEX=PASS;FS=13/15;RN=NODE_KR1876_Het_trim_bwaMEM_sort_modif.bam.generator.V2_1696_L541_D26:10:13::MH0;MQ=60;cigar=251M1D290M;SB=0.434783;AS=2-3;CVT=D;HD=-1_-1_-1_-1_-1_-1_-1_-1_-1_-1_-1_33_34_34_33_33_32_31_32_33_32_31_31_31_-1_-1_;AO=31;VT=D	GT:DP:RO:AO	0/1:51:20:31	0/0:9:9:0	0/0:35:35:0
IV	1439126	X-DeNovo	G	A	100	PASS	PH=PHASED-56-Havaiian_SV_trim_bwaMEM_sort_modif.bam;FEX=PASS;FS=25/25;RN=NODE_KR1876_Het_trim_bwaMEM_sort_modif.bam.generator.V2_1706_L765_D24:18:16::MH0;MQ=60;cigar=765M;SB=0.529412;AS=2-1;CVT=X;HD=21_21_22_22_22_22_21_21_21_20_21_21_22_22_23_22_22_23_23_23_23_23_23_23_23_;AO=20;VT=X	GT:DP:RO:AO	1/1:20:0:20	0/0:16:16:0	0/0:32:32:0
IV	1475124	X-DeNovo	C	A	104	PASS	PH=none;FEX=PASS;FS=26/25;RN=NODE_KR1876_Het_trim_bwaMEM_sort_modif.bam.generator.V2_1716_L531_D20:8:10::MH0;MQ=60;cigar=531M;SB=0.444444;AS=4-1;CVT=X;HD=21_21_21_21_21_21_21_21_21_21_20_21_21_21_19_19_19_18_18_18_17_18_18_18_18_;AO=17;VT=X	GT:DP:RO:AO	1/1:17:0:17	0/0:7:7:0	0/0:19:19:0
IV	1475126	X-DeNovo	T	A	104	PASS	PH=none;FEX=PASS;FS=26/25;RN=NODE_KR1876_Het_trim_bwaMEM_sort_modif.bam.generator.V2_1716_L531_D20:8:10::MH0;MQ=60;cigar=531M;SB=0.444444;AS=4-1;CVT=X;HD=21_21_21_21_21_21_21_21_20_21_21_21_19_19_19_18_18_18_17_18_18_18_18_17_17_;AO=17;VT=X	GT:DP:RO:AO	1/1:17:0:17	0/0:7:7:0	0/0:19:19:0
IV	1564712	D-DeNovo	TG	T	24	PASS	PH=none;FEX=PASS;FS=6/25;RN=NODE_KR1876_Het_trim_bwaMEM_sort_modif.bam.generator.V2_1722_L524_D16:6:7::MH0;MQ=60;cigar=388M1D136M;SB=0.461538;AS=7-3;CVT=D;HD=16_-1_18_19_18_18_18_-1_-1_-1_-1_-1_-1_-1_-1_-1_-1_-1_-1_-1_-1_-1_-1_-1_-1_-1_;AO=16;VT=D	GT:DP:RO:AO	0/1:39:23:16	0/0:7:7:0	0/0:38:38:0
IV	1593793	X-DeNovo	T	C	100	PASS	PH=PHASED-52-N2_SV_trim_bwaMEM_sort_modif.bam;FEX=PASS;FS=25/25;RN=NODE_KR1876_Het_trim_bwaMEM_sort_modif.bam.generator.V2_1728_L714_D31:14:16::MH0;MQ=60;cigar=714M;SB=0.466667;AS=2-1;CVT=X;HD=31_31_30_31_31_31_30_30_30_30_30_30_30_30_30_32_32_32_33_33_33_32_32_34_34_;AO=30;VT=X	GT:DP:RO:AO	1/1:30:0:30	0/0:11:11:0	0/0:38:38:0
IV	2013477	X-DeNovo	C	A	100	PASS	PH=PHASED-53-N2_SV_trim_bwaMEM_sort_modif.bam;FEX=PASS;FS=25/25;RN=NODE_KR1876_Het_trim_bwaMEM_sort_modif.bam.generator.V2_1748_L574_D17:7:7::MH0;MQ=60;cigar=574M;SB=0.5;AS=2-1;CVT=X;HD=17_17_17_17_17_17_17_16_16_16_16_16_17_16_16_16_16_16_16_16_16_16_16_15_15_;AO=15;VT=X	GT:DP:RO:AO	1/1:15:0:15	0/0:17:17:0	0/0:22:22:0
IV	2401058	X-DeNovo	G	A	100	PASS	PH=PHASED-15-N2_SV_trim_bwaMEM_sort_modif.bam;FEX=PASS;FS=25/25;RN=NODE_KR1876_Het_trim_bwaMEM_sort_modif.bam.generator.V2_1782_L609_D26:11:15::MH0;MQ=60;cigar=609M;SB=0.423077;AS=2-1;CVT=X;HD=27_27_27_27_27_29_29_29_29_28_28_29_29_29_28_27_27_27_26_26_25_26_26_26_29_;AO=25;VT=X	GT:DP:RO:AO	1/1:25:0:25	0/0:13:13:0	0/0:33:33:0
IV	2646668	X-DeNovo	T	A	8	PASS	PH=PHASED-42-N2_SV_trim_bwaMEM_sort_modif.bam;FEX=PASS;FS=2/25;RN=NODE_KR1876_Het_trim_bwaMEM_sort_modif.bam.generator.V2_1799_L474_D18:5:9::MH0;MQ=60;cigar=474M;SB=0.357143;AS=5-1;CVT=X;HD=-1_-1_-1_-1_-1_-1_-1_-1_-1_-1_-1_-1_-1_-1_-1_-1_-1_-1_-1_-1_-1_-1_-1_20_20_;AO=20;VT=X	GT:DP:RO:AO	0/1:37:17:20	0/0:14:14:0	0/0:33:33:0
IV	3325920	X-DeNovo	C	T	16	PASS	PH=PHASED-23-N2_SV_trim_bwaMEM_sort_modif.bam;FEX=PASS;FS=4/25;RN=NODE_KR1876_Het_trim_bwaMEM_sort_modif.bam.generator.V2_1841_L608_D13:8:6::MH0;MQ=60;cigar=212M396S;SB=0.571429;AS=7-2;CVT=X;HD=20_22_22_21_-1_-1_-1_-1_-1_-1_-1_-1_-1_-1_-1_-1_-1_-1_-1_-1_-1_-1_-1_-1_-1_;AO=20;VT=X	GT:DP:RO:AO	0/1:92:72:20	0/0:28:28:0	0/0:123:123:0
IV	3326056	OrphanBND-LC=0bnd_12-DeNovo	C	C[chr4:3326056[	29.1667	PASS	SVTYPE=BND;MATEID=bnd_12;PH=PHASED-7-N2_SV_trim_bwaMEM_sort_modif.bam;FEX=Pass;FS=7/24;RN=NODE_KR1876_Het_trim_bwaMEM_sort_modif.bam.generator.V2_1841_L608_D13:8:6::MH0;MQ=60_and_60;cigar=126S392M90S_and_126S392M90S;SB=0.571429;AS=4-3_and_	GT:DP:RO:AO	0/0:54:54:0	0/0:7:7:0	0/0:74:74:0
IV	3554302	X-DeNovo	A	T	100	PASS	PH=PHASED-5-Havaiian_SV_trim_bwaMEM_sort_modif.bam;FEX=PASS;FS=25/25;RN=NODE_KR1876_Het_trim_bwaMEM_sort_modif.bam.generator.V2_1855_L547_D19:12:7::MH0;MQ=60;cigar=547M;SB=0.631579;AS=2-1;CVT=X;HD=19_19_20_20_20_18_18_17_17_17_17_17_18_18_18_18_18_18_18_18_18_18_18_18_17_;AO=17;VT=X	GT:DP:RO:AO	1/1:17:0:17	0/0:10:10:0	0/0:46:46:0
IV	3694894	X-DeNovo	T	C	80	PASS	PH=none;FEX=PASS;FS=20/25;RN=NODE_KR1876_Het_trim_bwaMEM_sort_modif.bam.generator.V2_1864_L263_D12:7:4::MH0;MQ=60;cigar=263M;SB=0.636364;AS=3-1;CVT=X;HD=-1_-1_-1_-1_-1_9_9_9_9_9_9_9_9_9_10_11_12_12_12_13_13_14_14_14_14_;AO=9;VT=X	GT:DP:RO:AO	1/1:9:0:9	0/0:8:8:0	0/0:22:22:0
IV	3733207	4D-DeNovo	GTCAC	G	95.8333	PASS	PH=ConflictingPHASED-1-215;FEX=PASS;FS=23/24;RN=NODE_KR1876_Het_trim_bwaMEM_sort_modif.bam.generator.V2_1868_L685_D27:21:26::MH0;MQ=60;cigar=297M4D388M;SB=0.446809;AS=3-3;CVT=4D;HD=-1_30_29_28_27_28_29_29_29_29_29_29_28_27_26_26_25_26_26_26_26_26_26_27_-1_-1_-1_-1_-1_;AO=25;VT=DDDD	GT:DP:RO:AO	1/1:25:0:25	0/0:8:8:0	0/0:30:30:0
IV	3750246	X-DeNovo	C	A	100	PASS	PH=none;FEX=PASS;FS=25/25;RN=NODE_KR1876_Het_trim_bwaMEM_sort_modif.bam.generator.V2_1871_L664_D28:13:15::MH0;MQ=60;cigar=664M;SB=0.464286;AS=2-1;CVT=X;HD=27_27_27_27_27_28_28_28_29_30_30_30_30_29_29_29_29_29_31_31_31_32_32_29_29_;AO=27;VT=X	GT:DP:RO:AO	1/1:27:0:27	0/0:11:11:0	0/0:28:28:0
IV	3854568	4D-DeNovo	TTCCC	T	96	PASS	PH=PHASED-7-N2_SV_trim_bwaMEM_sort_modif.bam;FEX=PASS;FS=24/25;RN=NODE_KR1876_Het_trim_bwaMEM_sort_modif.bam.generator.V2_1873_L589_D22:10:12::MH0;MQ=60;cigar=366M4D223M;SB=0.454545;AS=2-3;CVT=4D;HD=24_24_24_25_25_26_26_26_25_25_25_23_23_23_23_22_22_22_22_22_22_22_21_20_-1_-1_-1_-1_-1_;AO=20;VT=DDDD	GT:DP:RO:AO	1/1:20:0:20	0/0:11:11:0	0/0:39:39:0
IV	3998958	X-DeNovo	G	C	100	PASS	PH=PHASED-75-N2_SV_trim_bwaMEM_sort_modif.bam;FEX=PASS;FS=25/25;RN=NODE_KR1876_Het_trim_bwaMEM_sort_modif.bam.generator.V2_1878_L519_D26:13:11::MH0;MQ=60;cigar=519M;SB=0.541667;AS=2-1;CVT=X;HD=23_22_22_22_21_21_21_22_22_22_22_22_22_22_22_22_22_22_22_22_23_23_23_23_23_;AO=21;VT=X	GT:DP:RO:AO	1/1:21:0:21	0/0:12:12:0	0/0:38:38:0
IV	4013557	X-DeNovo	C	G	100	PASS	PH=PHASED-20-N2_SV_trim_bwaMEM_sort_modif.bam;FEX=PASS;FS=25/25;RN=NODE_KR1876_Het_trim_bwaMEM_sort_modif.bam.generator.V2_1879_L758_D32:18:16::MH0;MQ=60;cigar=758M;SB=0.529412;AS=4-1;CVT=X;HD=28_28_28_28_29_29_29_29_29_29_29_29_28_28_27_26_26_26_26_26_26_26_25_24_23_;AO=23;VT=X	GT:DP:RO:AO	1/1:23:0:23	0/0:10:10:0	0/0:35:35:0
IV	4095791	X-DeNovo	G	C	100	PASS	PH=none;FEX=PASS;FS=25/25;RN=NODE_KR1876_Het_trim_bwaMEM_sort_modif.bam.generator.V2_1884_L428_D16:10:6::MH0;MQ=60;cigar=428M;SB=0.625;AS=2-1;CVT=X;HD=19_19_19_18_18_18_19_20_19_20_20_20_20_20_19_19_19_19_19_19_17_17_17_17_18_;AO=17;VT=X	GT:DP:RO:AO	1/1:17:0:17	0/0:8:8:0	0/0:23:23:0
IV	4156299	X-DeNovo	C	T	100	PASS	PH=PHASED-578-N2_SV_trim_bwaMEM_sort_modif.bam;FEX=PASS;FS=25/25;RN=NODE_KR1876_Het_trim_bwaMEM_sort_modif.bam.generator.V2_1890_L671_D25:13:11::MH0;MQ=60;cigar=671M;SB=0.541667;AS=2-1;CVT=X;HD=22_22_22_21_21_22_22_23_23_23_23_24_24_24_25_26_27_27_29_29_29_29_29_29_28_;AO=21;VT=X	GT:DP:RO:AO	1/1:21:0:21	0/0:8:8:0	.:0:0:0
IV	4442088	X-DeNovo	A	C	100	PASS	PH=none;FEX=PASS;FS=25/25;RN=NODE_KR1876_Het_trim_bwaMEM_sort_modif.bam.generator.V2_1899_L592_D17:12:4::MH0;MQ=60;cigar=592M;SB=0.75;AS=2-1;CVT=X;HD=19_19_20_20_19_19_19_16_16_16_16_14_14_15_15_15_15_15_15_15_15_15_15_15_16_;AO=14;VT=X	GT:DP:RO:AO	1/1:14:0:14	0/0:8:8:0	0/0:33:33:0
IV	4931173	X-DeNovo	C	A	100	PASS	PH=PHASED-14-N2_SV_trim_bwaMEM_sort_modif.bam;FEX=PASS;FS=25/25;RN=NODE_KR1876_Het_trim_bwaMEM_sort_modif.bam.generator.V2_1906_L516_D29:13:16::MH0;MQ=60;cigar=516M;SB=0.448276;AS=3-1;CVT=X;HD=32_32_31_31_31_31_30_30_30_30_30_31_31_31_31_31_31_31_31_32_32_32_32_32_32_;AO=30;VT=X	GT:DP:RO:AO	1/1:30:0:30	0/0:14:14:0	0/0:36:36:0
IV	4980936	X-DeNovo	A	C	100	PASS	PH=none;FEX=PASS;FS=25/25;RN=NODE_KR1876_Het_trim_bwaMEM_sort_modif.bam.generator.V2_1907_L585_D17:8:7::MH0;MQ=60;cigar=585M;SB=0.533333;AS=2-1;CVT=X;HD=13_13_13_16_16_16_16_16_16_16_16_16_16_16_16_16_16_15_15_15_16_16_17_17_17_;AO=13;VT=X	GT:DP:RO:AO	1/1:13:0:13	0/0:8:8:0	0/0:28:28:0
IV	5146718	X-DeNovo	A	T	100	PASS	PH=PHASED-28-Havaiian_SV_trim_bwaMEM_sort_modif.bam;FEX=PASS;FS=25/25;RN=NODE_KR1876_Het_trim_bwaMEM_sort_modif.bam.generator.V2_1913_L497_D25:11:14::MH0;MQ=60;cigar=497M;SB=0.44;AS=2-1;CVT=X;HD=28_28_27_27_27_27_27_26_26_25_25_26_26_25_26_26_27_27_27_27_27_26_26_25_25_;AO=25;VT=X	GT:DP:RO:AO	1/1:25:0:25	0/0:10:10:0	0/0:27:27:0
IV	5559708	9005Y-DeNovo	C	<DUP>	66.6667	PASS	SVTYPE=DUP;END=5568714;SVLEN=9005;PH=PHASED-40-N2_SV_trim_bwaMEM_sort_modif.bam;FEX=Pass;FS=16/24;RN=NODE_KR1876_Het_trim_bwaMEM_sort_modif.bam.generator.V2_1920_L547_D24:13:7::MH0;MQ=60_and_60;cigar=220S327M_and_228M319S;SB=0.65;AS=1-2_and_1-2	GT:DP:RO:AO	0/1:37:16:21	0/0:9:9:0	0/0:38:38:0
IV	5750505	D-DeNovo	GT	G	93.75	PASS	PH=none;FEX=PASS;FS=15/16;RN=NODE_KR1876_Het_trim_bwaMEM_sort_modif.bam.generator.V2_1921_L728_D24:14:7::MH0;MQ=60;cigar=280M1D448M;SB=0.666667;AS=2-3;CVT=D;HD=-1_-1_-1_-1_-1_-1_-1_-1_-1_24_24_24_24_25_25_25_25_25_24_24_24_25_25_25_-1_-1_;AO=24;VT=D	GT:DP:RO:AO	1/1:24:0:24	0/0:10:10:0	0/0:29:29:0
IV	6810908	X-DeNovo	T	A	100	PASS	PH=PHASED-18-N2_SV_trim_bwaMEM_sort_modif.bam;FEX=PASS;FS=25/25;RN=NODE_KR1876_Het_trim_bwaMEM_sort_modif.bam.generator.V2_1949_L844_D29:14:15::MH0;MQ=60;cigar=844M;SB=0.482759;AS=3-1;CVT=X;HD=26_26_27_27_25_26_25_25_24_24_24_23_23_23_23_21_20_20_20_21_21_21_21_22_23_;AO=20;VT=X	GT:DP:RO:AO	1/1:20:0:20	0/0:10:10:0	0/0:40:40:0
IV	6968086	X-DeNovo	C	G	100	PASS	PH=PHASED-25-N2_SV_trim_bwaMEM_sort_modif.bam;FEX=PASS;FS=25/25;RN=NODE_KR1876_Het_trim_bwaMEM_sort_modif.bam.generator.V2_1950_L685_D31:17:14::MH0;MQ=60;cigar=685M;SB=0.548387;AS=2-1;CVT=X;HD=30_29_29_29_29_31_30_29_30_30_30_29_30_31_31_30_30_29_29_29_29_29_30_31_31_;AO=29;VT=X	GT:DP:RO:AO	1/1:29:0:29	0/0:13:13:0	0/0:35:35:0
IV	7306443	X-DeNovo	C	T	100	PASS	PH=none;FEX=PASS;FS=25/25;RN=NODE_KR1876_Het_trim_bwaMEM_sort_modif.bam.generator.V2_1953_L555_D32:15:16::MH0;MQ=60;cigar=555M;SB=0.483871;AS=2-1;CVT=X;HD=33_33_34_34_34_33_33_32_32_32_33_33_33_33_33_34_34_34_35_34_34_34_34_34_34_;AO=32;VT=X	GT:DP:RO:AO	1/1:32:0:32	0/0:12:12:0	0/0:33:33:0
IV	8308776	X-DeNovo	A	G	100	PASS	PH=none;FEX=PASS;FS=25/25;RN=NODE_KR1876_Het_trim_bwaMEM_sort_modif.bam.generator.V2_1965_L518_D20:12:6::MH0;MQ=60;cigar=518M;SB=0.666667;AS=2-1;CVT=X;HD=20_20_20_20_20_20_20_20_20_21_20_20_20_19_19_20_20_20_20_20_20_20_20_21_21_;AO=19;VT=X	GT:DP:RO:AO	1/1:19:0:19	0/0:11:11:0	0/0:33:33:0
IV	8618788	I-DeNovo	T	TA	100	PASS	PH=none;FEX=PASS;FS=18/18;RN=NODE_KR1876_Het_trim_bwaMEM_sort_modif.bam.generator.V2_1969_L501_D26:10:15::MH0;MQ=60;cigar=290M1I210M;SB=0.4;AS=2-3;CVT=I;HD=-1_-1_-1_-1_-1_-1_-1_23_23_23_24_24_24_25_26_26_25_26_26_26_27_27_26_26_26_-1_;AO=23;VT=I	GT:DP:RO:AO	1/1:23:0:23	0/0:8:8:0	0/0:36:36:0
IV	9960022	14I-DeNovo	A	ATGTGCAAAAAATCT	100	PASS	PH=none;FEX=PASS;FS=37/37;RN=NODE_KR1876_Het_trim_bwaMEM_sort_modif.bam.generator.V2_1976_L687_D27:16:12::MH0;MQ=60;cigar=318M14I355M;SB=0.571429;AS=3-3;CVT=14I;HD=-1_23_24_23_23_23_22_23_23_23_23_24_24_24_25_25_26_26_26_26_26_26_26_26_27_26_25_26_27_25_23_22_22_22_22_22_22_22_-1_;AO=22;VT=IIIIIIIIIIIIII	GT:DP:RO:AO	1/1:22:0:22	0/0:8:8:0	0/0:23:23:0
IV	10158001	20I-DeNovo	T	TACTCTGAATCAAAAAAATAT	97.3684	PASS	PH=none;FEX=PASS;FS=37/38;RN=NODE_KR1876_Het_trim_bwaMEM_sort_modif.bam.generator.V2_1982_L653_D27:13:15::MH0;MQ=60;cigar=264M7D1M20I368M;SB=0.464286;AS=4-5;CVT=20I;HD=21_21_21_22_22_21_21_21_21_20_20_20_20_19_18_18_-1_-1_-1_-1_-1_-1_-1_18_17_17_17_17_17_17_16_16_16_15_16_17_17_17_19_18_18_18_18_-1_-1_;AO=15;VT=IIIIIIIIIIIIIIIIIIII	GT:DP:RO:AO	0/1:34:19:15	0/0:12:12:0	0/0:32:32:0
IV	10194570	I-DeNovo	G	GT	100	PASS	PH=PHASED-12-Havaiian_SV_trim_bwaMEM_sort_modif.bam;FEX=PASS;FS=19/19;RN=NODE_KR1876_Het_trim_bwaMEM_sort_modif.bam.generator.V2_1983_L555_D12:7:5::MH0;MQ=60;cigar=275M1I279M;SB=0.583333;AS=2-3;CVT=I;HD=-1_-1_-1_-1_-1_-1_14_14_14_14_14_14_14_14_14_14_14_15_15_15_15_15_15_15_15_-1_;AO=14;VT=I	GT:DP:RO:AO	1/1:14:0:14	0/0:13:13:0	0/0:31:31:0
IV	10879441	X-DeNovo	G	T	100	PASS	PH=none;FEX=PASS;FS=25/25;RN=NODE_KR1876_Het_trim_bwaMEM_sort_modif.bam.generator.V2_1992_L498_D21:10:9::MH0;MQ=60;cigar=498M;SB=0.526316;AS=3-1;CVT=X;HD=19_19_19_19_19_20_20_20_20_20_20_20_20_21_21_21_21_22_22_22_22_23_23_23_24_;AO=19;VT=X	GT:DP:RO:AO	1/1:19:0:19	0/0:14:14:0	0/0:41:41:0
IV	10920084	X-DeNovo	G	A	100	PASS	PH=none;FEX=PASS;FS=25/25;RN=NODE_KR1876_Het_trim_bwaMEM_sort_modif.bam.generator.V2_1993_L505_D13:6:7::MH0;MQ=60;cigar=505M;SB=0.461538;AS=2-1;CVT=X;HD=11_11_11_11_11_11_10_11_11_11_11_11_11_11_12_12_12_12_12_12_12_12_12_12_13_;AO=10;VT=X	GT:DP:RO:AO	1/1:10:0:10	0/0:8:8:0	0/0:37:37:0
IV	11732097	X-DeNovo	C	T	100	PASS	PH=none;FEX=PASS;FS=25/25;RN=NODE_KR1876_Het_trim_bwaMEM_sort_modif.bam.generator.V2_2009_L486_D23:13:10::MH0;MQ=60;cigar=486M;SB=0.565217;AS=2-1;CVT=X;HD=23_23_24_24_24_24_23_22_23_24_24_23_23_23_23_24_25_25_25_25_25_25_25_25_26_;AO=22;VT=X	GT:DP:RO:AO	1/1:22:0:22	0/0:18:18:0	0/0:37:37:0
IV	11925824	X-DeNovo	C	G	100	PASS	PH=none;FEX=PASS;FS=25/25;RN=NODE_KR1876_Het_trim_bwaMEM_sort_modif.bam.generator.V2_2012_L600_D28:15:11::MH0;MQ=60;cigar=600M;SB=0.576923;AS=2-1;CVT=X;HD=25_25_24_24_24_24_24_24_25_26_26_25_25_25_25_25_26_26_26_25_25_25_25_25_24_;AO=24;VT=X	GT:DP:RO:AO	1/1:24:0:24	0/0:15:15:0	0/0:24:24:0
IV	12276192	XX-DeNovo	CC	TT	100	PASS	PH=none;FEX=PASS;FS=26/26;RN=NODE_KR1876_Het_trim_bwaMEM_sort_modif.bam.generator.V2_2022_L736_D23:12:10::MH0;MQ=60;cigar=736M;SB=0.545455;AS=3-1;CVT=XX;HD=19_19_19_19_19_20_21_21_21_21_21_21_18_20_20_20_20_20_20_20_21_21_21_20_20_20_-1_;AO=18;VT=XX	GT:DP:RO:AO	1/1:18:0:18	0/0:11:11:0	0/0:36:36:0
IV	12566870	181D-DeNovo	CGAAATTTTTGAGAATGTTTCCCATTTTTCTCATTCCGTACCAATCTTATTGAGCGCTTGGCGGATGTTCAACTTGGTTCGATTGCAGCAAATCGTTGATATTCTTCTCCAAATCATCGATTCTCGTTGTCATATCATCGATTCGCCGAATAATCTGATCCGACATGTGCTGGAATCGATCC	C	88	PASS	PH=PHASED-25-N2_SV_trim_bwaMEM_sort_modif.bam;FEX=PASS;FS=22/25;RN=NODE_KR1876_Het_trim_bwaMEM_sort_modif.bam.generator.V2_2029_L659_D33:14:18::MH0;MQ=60;cigar=386M273S;SB=0.4375;AS=1-2;CVT=181D;HD=29_29_28_28_29_29_28_28_29_29_29_28_28_28_28_28_28_28_28_27_26_27_-1_-1_-1_-1_-1_-1_-1_-1_-1_-1_-1_-1_-1_-1_-1_-1_-1_-1_-1_-1_-1_-1_-1_-1_-1_-1_-1_-1_-1_-1_-1_-1_-1_-1_-1_-1_-1_-1_-1_-1_-1_-1_-1_-1_-1_…	GT:DP:RO:AO	0/1:52:26:26	0/0:4:4:0	0/0:32:32:0
IV	13557888	70D-DeNovo	TTACGGTTTTGGTATTCCTCAGATGAGTACACTATTTTTTGTGGTCTGGAAATTTTTAAAGAAAATGGGAT	T	88	PASS	PH=none;FEX=PASS;FS=22/25;RN=NODE_KR1876_Het_trim_bwaMEM_sort_modif.bam.generator.V2_2068_L522_D21:5:12::MH0;MQ=60;cigar=251M271S;SB=0.294118;AS=1-2;CVT=70D;HD=18_18_17_17_18_18_19_19_19_19_19_18_17_17_16_16_16_16_16_17_17_17_-1_-1_-1_-1_-1_-1_-1_-1_-1_-1_-1_-1_-1_-1_-1_-1_-1_-1_-1_-1_-1_-1_-1_-1_-1_-1_-1_-1_-1_-1_-1_-1_-1_-1_-1_-1_-1_-1_-1_-1_-1_-1_-1_-1_-1_-1_-1_-1_-1_-1_-1_-1_-1_-1_-1_-1_-1_-1…	GT:DP:RO:AO	0/1:33:17:16	0/0:6:6:0	0/0:38:38:0
V	519185	X-DeNovo	G	T	100	PASS	PH=PHASED-25-N2_SV_trim_bwaMEM_sort_modif.bam;FEX=PASS;FS=25/25;RN=NODE_KR1876_Het_trim_bwaMEM_sort_modif.bam.generator.V2_2212_L498_D26:12:13::MH0;MQ=60;cigar=498M;SB=0.48;AS=2-1;CVT=X;HD=29_29_29_29_29_29_28_28_28_28_27_27_25_25_25_25_24_24_24_24_25_25_24_24_24_;AO=24;VT=X	GT:DP:RO:AO	1/1:24:0:24	0/0:10:10:0	0/0:33:33:0
V	723717	X-DeNovo	G	T	100	PASS	PH=PHASED-45-N2_SV_trim_bwaMEM_sort_modif.bam;FEX=PASS;FS=25/25;RN=NODE_KR1876_Het_trim_bwaMEM_sort_modif.bam.generator.V2_2227_L608_D27:14:13::MH0;MQ=60;cigar=608M;SB=0.518519;AS=2-1;CVT=X;HD=27_27_26_24_24_24_24_24_24_24_24_25_26_23_22_20_20_20_20_20_24_23_23_23_23_;AO=20;VT=X	GT:DP:RO:AO	1/1:20:0:20	0/0:8:8:0	0/0:24:24:0
V	776083	X-DeNovo	A	T	64	PASS	PH=PHASED-9-Havaiian_SV_trim_bwaMEM_sort_modif.bam;FEX=PASS;FS=16/25;RN=NODE_KR1876_Het_trim_bwaMEM_sort_modif.bam.generator.V2_2230_L595_D15:10:5::MH0;MQ=60;cigar=595M;SB=0.666667;AS=2-1;CVT=X;HD=-1_-1_-1_-1_-1_-1_-1_-1_-1_18_19_17_17_17_17_17_17_17_17_17_16_16_17_17_17_;AO=16;VT=X	GT:DP:RO:AO	1/1:16:0:16	0/0:8:8:0	0/0:40:40:0
V	826373	X-DeNovo	T	A	100	PASS	PH=ConflictingPHASED-5-1;FEX=PASS;FS=25/25;RN=NODE_KR1876_Het_trim_bwaMEM_sort_modif.bam.generator.V2_2231_L557_D29:14:15::MH0;MQ=60;cigar=557M;SB=0.482759;AS=2-1;CVT=X;HD=27_27_27_26_25_26_26_26_27_27_28_28_27_27_28_28_28_27_25_25_25_25_-1_24_22_;AO=22;VT=X	GT:DP:RO:AO	1/1:22:0:22	0/0:13:13:0	0/0:37:37:0
V	1060410	X-DeNovo	G	C	100	PASS	PH=PHASED-54-N2_SV_trim_bwaMEM_sort_modif.bam;FEX=PASS;FS=25/25;RN=NODE_KR1876_Het_trim_bwaMEM_sort_modif.bam.generator.V2_2247_L672_D30:16:12::MH0;MQ=60;cigar=672M;SB=0.571429;AS=2-1;CVT=X;HD=29_29_29_30_30_29_29_28_28_30_30_30_30_30_31_31_30_30_30_31_30_30_31_31_30_;AO=28;VT=X	GT:DP:RO:AO	1/1:28:0:28	0/0:8:8:0	0/0:35:35:0
V	2871011	3D-DeNovo	ATTT	A	95.8333	PASS	PH=PHASED-33-N2_SV_trim_bwaMEM_sort_modif.bam;FEX=PASS;FS=23/24;RN=NODE_KR1876_Het_trim_bwaMEM_sort_modif.bam.generator.V2_2347_L417_D16:6:9::MH0;MQ=60;cigar=282M3D135M;SB=0.4;AS=2-3;CVT=3D;HD=-1_19_19_20_20_19_19_19_19_20_19_19_19_19_20_19_19_20_20_20_20_19_19_19_-1_-1_-1_-1_;AO=19;VT=DDD	GT:DP:RO:AO	1/1:19:0:19	0/0:11:11:0	0/0:22:22:0
V	3561700	D-DeNovo	TA	T	96	PASS	PH=PHASED-295-N2_SV_trim_bwaMEM_sort_modif.bam;FEX=PASS;FS=24/25;RN=NODE_KR1876_Het_trim_bwaMEM_sort_modif.bam.generator.V2_2392_L676_D22:10:11::MH0;MQ=60;cigar=264M1D5M1D407M;SB=0.47619;AS=3-5;CVT=D;HD=20_19_18_18_19_19_19_19_19_19_19_20_21_22_22_21_21_21_-1_20_20_20_19_20_-1_-1_;AO=18;VT=D	GT:DP:RO:AO	0/1:37:19:18	0/0:18:18:0	0/0:59:59:0
V	3648014	X-DeNovo	T	A	96	PASS	PH=ConflictingPHASED-1-26;FEX=PASS;FS=24/25;RN=NODE_KR1876_Het_trim_bwaMEM_sort_modif.bam.generator.V2_2394_L640_D24:13:10::MH0;MQ=60;cigar=640M;SB=0.565217;AS=2-1;CVT=X;HD=27_28_28_28_28_29_29_29_30_29_28_28_28_28_30_28_27_27_28_28_28_28_25_25_-1_;AO=25;VT=X	GT:DP:RO:AO	1/1:25:0:25	0/0:9:9:0	.:0:0:0
V	4597303	X-DeNovo	G	A	100	PASS	PH=PHASED-50-N2_SV_trim_bwaMEM_sort_modif.bam;FEX=PASS;FS=25/25;RN=NODE_KR1876_Het_trim_bwaMEM_sort_modif.bam.generator.V2_2444_L748_D27:11:18::MH0;MQ=60;cigar=748M;SB=0.37931;AS=2-1;CVT=X;HD=23_23_24_24_26_24_24_24_24_24_23_23_22_23_23_23_23_23_23_23_23_23_22_22_22_;AO=22;VT=X	GT:DP:RO:AO	1/1:22:0:22	0/0:9:9:0	0/0:25:25:0
V	5852137	6D-DeNovo	TTTGCTA	T	95.4545	PASS	PH=none;FEX=PASS;FS=21/22;RN=NODE_KR1876_Het_trim_bwaMEM_sort_modif.bam.generator.V2_2472_L541_D14:7:6::MH0;MQ=60;cigar=265M6D86M6I1M6D183M;SB=0.538462;AS=4-7;CVT=6D;HD=-1_-1_-1_14_14_14_14_14_15_15_15_15_13_13_13_13_14_14_14_14_15_14_14_14_-1_-1_-1_-1_-1_-1_-1_;AO=13;VT=DDDDDD	GT:DP:RO:AO	1/1:13:0:13	0/0:8:8:0	0/0:26:26:0
V	6826421	X-DeNovo	T	A	100	PASS	PH=none;FEX=PASS;FS=25/25;RN=NODE_KR1876_Het_trim_bwaMEM_sort_modif.bam.generator.V2_2484_L648_D32:17:15::MH0;MQ=60;cigar=648M;SB=0.53125;AS=5-1;CVT=X;HD=28_28_28_27_27_27_28_28_29_29_29_28_30_30_31_31_32_32_33_33_32_32_32_32_33_;AO=27;VT=X	GT:DP:RO:AO	1/1:27:0:27	0/0:11:11:0	0/0:32:32:0
V	7609923	I-DeNovo	C	CA	100	PASS	PH=PHASED-414-N2_SV_trim_bwaMEM_sort_modif.bam;FEX=PASS;FS=20/20;RN=NODE_KR1876_Het_trim_bwaMEM_sort_modif.bam.generator.V2_2497_L554_D26:13:12::MH0;MQ=60;cigar=300M1I253M;SB=0.52;AS=2-3;CVT=I;HD=-1_-1_-1_-1_-1_23_24_23_23_23_25_25_25_25_24_25_25_24_24_24_24_24_23_23_23_-1_;AO=23;VT=I	GT:DP:RO:AO	1/1:23:0:23	0/0:9:9:0	.:0:0:0
V	8007507	X-DeNovo	T	C	100	PASS	PH=none;FEX=PASS;FS=25/25;RN=NODE_KR1876_Het_trim_bwaMEM_sort_modif.bam.generator.V2_2512_L457_D21:8:12::MH0;MQ=60;cigar=457M;SB=0.4;AS=2-1;CVT=X;HD=18_19_19_20_20_20_20_19_19_19_19_19_19_18_18_18_18_17_17_17_17_17_17_17_17_;AO=17;VT=X	GT:DP:RO:AO	1/1:17:0:17	0/0:10:10:0	0/0:38:38:0
V	8219257	D-DeNovo	GT	G	92.3077	PASS	PH=none;FEX=PASS;FS=12/13;RN=NODE_KR1876_Het_trim_bwaMEM_sort_modif.bam.generator.V2_2514_L479_D23:12:9::MH0;MQ=60;cigar=252M1D227M;SB=0.571429;AS=2-3;CVT=D;HD=-1_-1_-1_-1_-1_-1_-1_-1_-1_-1_-1_-1_21_22_20_22_22_22_22_22_24_24_24_24_-1_-1_;AO=20;VT=D	GT:DP:RO:AO	1/1:22:2:20	0/0:11:11:0	0/0:30:30:0
V	12494018	D-DeNovo	CT	C	93.75	PASS	PH=none;FEX=PASS;FS=15/16;RN=NODE_KR1876_Het_trim_bwaMEM_sort_modif.bam.generator.V2_2553_L495_D17:8:7::MH0;MQ=60;cigar=203M1D292M;SB=0.533333;AS=2-3;CVT=D;HD=-1_-1_-1_-1_-1_-1_-1_-1_-1_16_16_16_16_16_16_16_16_14_14_15_15_15_15_15_-1_-1_;AO=14;VT=D	GT:DP:RO:AO	1/1:14:0:14	0/0:12:12:0	0/0:30:30:0
V	12703335	X-DeNovo	C	T	100	PASS	PH=PHASED-25-N2_SV_trim_bwaMEM_sort_modif.bam;FEX=PASS;FS=25/25;RN=NODE_KR1876_Het_trim_bwaMEM_sort_modif.bam.generator.V2_2557_L645_D28:15:13::MH0;MQ=60;cigar=645M;SB=0.535714;AS=3-1;CVT=X;HD=26_27_27_27_28_29_29_28_28_28_28_28_28_28_27_27_27_27_27_28_29_29_29_29_29_;AO=26;VT=X	GT:DP:RO:AO	1/1:26:0:26	0/0:10:10:0	0/0:28:28:0
V	13646001	X-DeNovo	C	A	32	PASS	PH=PHASED-6-Havaiian_SV_trim_bwaMEM_sort_modif.bam;FEX=PASS;FS=8/25;RN=NODE_KR1876_Het_trim_bwaMEM_sort_modif.bam.generator.V2_2573_L429_D18:9:9::MH0;MQ=60;cigar=1S273M155S;SB=0.5;AS=9-3;CVT=X;HD=-1_-1_-1_-1_-1_-1_22_22_-1_-1_-1_-1_-1_-1_-1_-1_-1_-1_-1_20_19_20_20_18_18_;AO=18;VT=X	GT:DP:RO:AO	0/1:29:11:18	0/1:21:7:14	0/1:78:16:62
V	13646454	X-DeNovo	A	G	40	PASS	PH=PHASED-14-N2_SV_trim_bwaMEM_sort_modif.bam;FEX=PASS;FS=10/25;RN=NODE_KR1876_Het_trim_bwaMEM_sort_modif.bam.generator.V2_2574_L164_D5:2:3::MH0;MQ=7;cigar=22S128M14S;SB=0.4;AS=6-3;CVT=X;HD=-1_-1_-1_-1_-1_-1_-1_-1_-1_-1_-1_-1_-1_-1_22_21_22_22_22_21_21_21_20_22_-1_;AO=20;VT=X	GT:DP:RO:AO	0/1:55:35:20	1/1:101:8:93	0/1:68:28:40
V	13775780	X-DeNovo	G	A	100	PASS	PH=none;FEX=PASS;FS=25/25;RN=NODE_KR1876_Het_trim_bwaMEM_sort_modif.bam.generator.V2_2575_L632_D34:13:20::MH0;MQ=60;cigar=632M;SB=0.393939;AS=2-1;CVT=X;HD=24_24_24_25_25_26_26_26_25_25_25_27_27_27_27_27_27_28_27_28_30_30_30_30_30_;AO=24;VT=X	GT:DP:RO:AO	1/1:24:0:24	0/0:13:13:0	0/0:32:32:0
V	14190193	X-DeNovo	C	A	100	PASS	PH=PHASED-55-N2_SV_trim_bwaMEM_sort_modif.bam;FEX=PASS;FS=25/25;RN=NODE_KR1876_Het_trim_bwaMEM_sort_modif.bam.generator.V2_2578_L608_D22:13:9::MH0;MQ=60;cigar=608M;SB=0.590909;AS=2-1;CVT=X;HD=20_20_21_21_20_20_21_22_23_23_23_23_23_23_23_23_24_23_23_23_23_23_23_23_23_;AO=20;VT=X	GT:DP:RO:AO	1/1:20:0:20	0/0:12:12:0	0/0:35:35:0
V	15117054	X-DeNovo	C	T	100	PASS	PH=PHASED-56-N2_SV_trim_bwaMEM_sort_modif.bam;FEX=PASS;FS=25/25;RN=NODE_KR1876_Het_trim_bwaMEM_sort_modif.bam.generator.V2_2586_L609_D25:10:14::MH0;MQ=60;cigar=609M;SB=0.416667;AS=3-1;CVT=X;HD=21_19_19_20_19_19_20_21_21_21_24_24_24_22_22_23_24_24_24_24_25_25_26_26_25_;AO=19;VT=X	GT:DP:RO:AO	1/1:19:0:19	0/0:8:8:0	0/0:33:33:0
V	15679246	X-DeNovo	T	A	100	PASS	PH=PHASED-96-N2_SV_trim_bwaMEM_sort_modif.bam;FEX=PASS;FS=25/25;RN=NODE_KR1876_Het_trim_bwaMEM_sort_modif.bam.generator.V2_2605_L486_D19:10:8::MH0;MQ=60;cigar=486M;SB=0.555556;AS=3-1;CVT=X;HD=20_20_20_20_20_20_20_19_19_18_19_19_19_20_20_22_20_20_20_20_20_21_21_21_20_;AO=18;VT=X	GT:DP:RO:AO	1/1:18:0:18	0/0:9:9:0	0/0:19:19:0
V	15950791	X-DeNovo	A	C	100	PASS	PH=PHASED-602-N2_SV_trim_bwaMEM_sort_modif.bam;FEX=PASS;FS=25/25;RN=NODE_KR1876_Het_trim_bwaMEM_sort_modif.bam.generator.V2_2626_L651_D31:16:12::MH0;MQ=60;cigar=651M;SB=0.571429;AS=2-1;CVT=X;HD=31_31_30_30_30_31_31_30_30_30_30_30_30_30_30_29_30_30_30_30_30_30_30_30_31_;AO=29;VT=X	GT:DP:RO:AO	1/1:29:0:29	0/0:11:11:0	.:0:0:0
V	16004763	X-DeNovo	A	G	100	PASS	PH=none;FEX=PASS;FS=19/19;RN=NODE_KR1876_Het_trim_bwaMEM_sort_modif.bam.generator.V2_2633_L645_D28:13:15::MH0;MQ=60;cigar=303M7D342M;SB=0.464286;AS=5-3;CVT=X;HD=25_25_25_25_25_25_25_24_-1_-1_-1_-1_-1_-1_-1_24_24_24_24_25_23_24_24_24_23_;AO=23;VT=X	GT:DP:RO:AO	1/1:23:0:23	0/0:14:14:0	0/0:32:32:0
V	16298996	X-DeNovo	C	T	100	PASS	PH=PHASED-47-N2_SV_trim_bwaMEM_sort_modif.bam;FEX=PASS;FS=25/25;RN=NODE_KR1876_Het_trim_bwaMEM_sort_modif.bam.generator.V2_2649_L673_D21:11:9::MH0;MQ=60;cigar=673M;SB=0.55;AS=2-1;CVT=X;HD=24_24_24_24_24_24_24_24_25_26_24_24_24_24_24_23_23_22_22_21_22_22_22_22_24_;AO=21;VT=X	GT:DP:RO:AO	1/1:21:0:21	0/0:13:13:0	0/0:28:28:0
V	16706402	X-DeNovo	A	T	100	PASS	PH=PHASED-25-N2_SV_trim_bwaMEM_sort_modif.bam;FEX=PASS;FS=25/25;RN=NODE_KR1876_Het_trim_bwaMEM_sort_modif.bam.generator.V2_2675_L481_D20:14:5::MH0;MQ=60;cigar=481M;SB=0.736842;AS=2-1;CVT=X;HD=17_18_18_18_18_18_19_17_16_16_16_16_16_15_15_15_15_16_16_16_16_16_16_17_17_;AO=15;VT=X	GT:DP:RO:AO	1/1:15:0:15	0/0:11:11:0	0/0:23:23:0
V	17016511	X-DeNovo	C	T	100	PASS	PH=PHASED-25-N2_SV_trim_bwaMEM_sort_modif.bam;FEX=PASS;FS=25/25;RN=NODE_KR1876_Het_trim_bwaMEM_sort_modif.bam.generator.V2_2700_L554_D21:10:11::MH0;MQ=60;cigar=554M;SB=0.47619;AS=2-1;CVT=X;HD=28_28_29_29_29_30_30_29_29_30_28_28_27_27_27_27_27_27_27_27_26_26_24_24_23_;AO=23;VT=X	GT:DP:RO:AO	1/1:23:0:23	0/0:10:10:0	0/0:33:33:0
V	17174545	X-DeNovo	C	T	100	PASS	PH=PHASED-164-N2_SV_trim_bwaMEM_sort_modif.bam;FEX=PASS;FS=25/25;RN=NODE_KR1876_Het_trim_bwaMEM_sort_modif.bam.generator.V2_2709_L799_D24:14:9::MH0;MQ=60;cigar=799M;SB=0.608696;AS=2-1;CVT=X;HD=27_27_27_28_28_28_28_27_27_27_25_25_25_25_25_25_25_25_25_24_23_22_21_21_23_;AO=21;VT=X	GT:DP:RO:AO	0/1:46:25:21	0/0:8:8:0	0/0:41:41:0
V	17383653	X-DeNovo	C	A	100	PASS	PH=PHASED-86-N2_SV_trim_bwaMEM_sort_modif.bam;FEX=PASS;FS=25/25;RN=NODE_KR1876_Het_trim_bwaMEM_sort_modif.bam.generator.V2_2731_L725_D30:17:12::MH0;MQ=60;cigar=725M;SB=0.586207;AS=2-1;CVT=X;HD=33_33_32_32_32_32_32_32_30_30_30_30_30_30_30_30_30_30_30_28_28_28_28_27_27_;AO=27;VT=X	GT:DP:RO:AO	0/1:47:20:27	0/0:11:11:0	0/0:42:42:0
V	18530655	X-DeNovo	G	C	96	PASS	PH=PHASED-37-N2_SV_trim_bwaMEM_sort_modif.bam;FEX=PASS;FS=24/25;RN=NODE_KR1876_Het_trim_bwaMEM_sort_modif.bam.generator.V2_2813_L419_D21:12:6::MH0;MQ=21;cigar=419M;SB=0.666667;AS=2-1;CVT=X;HD=-1_22_21_21_21_21_21_21_21_21_21_21_23_23_21_21_21_21_22_22_22_22_22_22_22_;AO=21;VT=X	GT:DP:RO:AO	0/1:101:80:21	0/0:20:20:0	0/0:142:142:0
X	363939	X-DeNovo	C	T	100	PASS	PH=none;FEX=PASS;FS=25/25;RN=NODE_KR1876_Het_trim_bwaMEM_sort_modif.bam.generator.V2_3004_L568_D16:7:9::MH0;MQ=60;cigar=568M;SB=0.4375;AS=2-1;CVT=X;HD=19_19_19_19_19_19_19_18_18_18_18_18_18_18_18_19_19_19_18_18_18_18_18_18_18_;AO=18;VT=X	GT:DP:RO:AO	1/1:18:0:18	0/0:10:10:0	0/0:30:30:0
X	890191	X-DeNovo	T	C	100	PASS	PH=PHASED-19-N2_SV_trim_bwaMEM_sort_modif.bam;FEX=PASS;FS=25/25;RN=NODE_KR1876_Het_trim_bwaMEM_sort_modif.bam.generator.V2_3013_L483_D35:16:19::MH0;MQ=60;cigar=458M25S;SB=0.457143;AS=2-2;CVT=X;HD=38_38_38_38_38_38_38_38_36_36_34_34_34_34_32_32_32_32_32_32_32_32_33_33_32_;AO=32;VT=X	GT:DP:RO:AO	1/1:32:0:32	0/0:14:14:0	0/0:31:31:0
X	913619	X-DeNovo	C	T	100	PASS	PH=none;FEX=PASS;FS=25/25;RN=NODE_KR1876_Het_trim_bwaMEM_sort_modif.bam.generator.V2_3015_L531_D21:10:10::MH0;MQ=60;cigar=531M;SB=0.5;AS=2-1;CVT=X;HD=22_23_22_22_22_22_22_22_22_22_22_22_22_22_22_22_22_22_22_22_22_22_22_22_23_;AO=22;VT=X	GT:DP:RO:AO	1/1:22:0:22	0/0:11:11:0	0/0:29:29:0
X	989923	X-DeNovo	T	A	100	PASS	PH=none;FEX=PASS;FS=25/25;RN=NODE_KR1876_Het_trim_bwaMEM_sort_modif.bam.generator.V2_3016_L707_D23:11:12::MH0;MQ=60;cigar=707M;SB=0.478261;AS=2-1;CVT=X;HD=24_23_23_24_25_25_26_26_26_25_26_25_25_25_26_27_27_27_27_27_27_27_27_27_27_;AO=23;VT=X	GT:DP:RO:AO	1/1:23:0:23	0/0:13:13:0	0/0:40:40:0
X	1251182	X-DeNovo	C	T	100	PASS	PH=none;FEX=PASS;FS=25/25;RN=NODE_KR1876_Het_trim_bwaMEM_sort_modif.bam.generator.V2_3023_L702_D31:15:14::MH0;MQ=60;cigar=702M;SB=0.517241;AS=2-1;CVT=X;HD=30_30_29_29_29_28_29_30_30_30_30_30_31_31_32_32_32_32_32_32_32_31_31_32_32_;AO=28;VT=X	GT:DP:RO:AO	1/1:28:0:28	0/0:12:12:0	0/0:28:28:0
X	1939253	X-DeNovo	C	T	100	PASS	PH=PHASED-582-N2_SV_trim_bwaMEM_sort_modif.bam;FEX=PASS;FS=25/25;RN=NODE_KR1876_Het_trim_bwaMEM_sort_modif.bam.generator.V2_3047_L631_D21:14:5::MH0;MQ=60;cigar=631M;SB=0.736842;AS=2-1;CVT=X;HD=14_14_14_14_15_15_15_15_14_15_15_15_15_15_16_16_17_17_17_18_18_18_19_20_20_;AO=14;VT=X	GT:DP:RO:AO	1/1:14:0:14	0/0:11:11:0	.:0:0:0
X	2041072	X-DeNovo	C	T	100	PASS	PH=none;FEX=PASS;FS=25/25;RN=NODE_KR1876_Het_trim_bwaMEM_sort_modif.bam.generator.V2_3050_L927_D26:11:14::MH0;MQ=60;cigar=927M;SB=0.44;AS=2-1;CVT=X;HD=23_22_21_21_21_21_21_21_21_21_22_22_21_21_20_20_20_20_20_20_20_19_19_19_20_;AO=19;VT=X	GT:DP:RO:AO	1/1:19:0:19	0/0:16:16:0	0/0:29:29:0
X	2053475	X-DeNovo	C	T	24	PASS	PH=none;FEX=PASS;FS=6/25;RN=NODE_KR1876_Het_trim_bwaMEM_sort_modif.bam.generator.V2_3052_L544_D26:10:16::MH0;MQ=60;cigar=544M;SB=0.384615;AS=4-1;CVT=X;HD=23_23_22_22_22_21_-1_-1_-1_-1_-1_-1_-1_-1_-1_-1_-1_-1_-1_-1_-1_-1_-1_-1_-1_;AO=21;VT=X	GT:DP:RO:AO	1/1:21:0:21	0/0:9:9:0	0/0:34:34:0
X	2685198	X-DeNovo	C	T	100	PASS	PH=PHASED-25-N2_SV_trim_bwaMEM_sort_modif.bam;FEX=PASS;FS=25/25;RN=NODE_KR1876_Het_trim_bwaMEM_sort_modif.bam.generator.V2_3069_L657_D30:16:12::MH0;MQ=60;cigar=657M;SB=0.571429;AS=2-1;CVT=X;HD=23_23_24_24_24_24_26_26_25_25_25_25_25_27_27_27_28_29_29_29_29_29_29_29_29_;AO=23;VT=X	GT:DP:RO:AO	1/1:23:0:23	0/0:19:19:0	0/0:34:34:0
X	2871283	X-DeNovo	C	T	100	PASS	PH=PHASED-38-N2_SV_trim_bwaMEM_sort_modif.bam;FEX=PASS;FS=25/25;RN=NODE_KR1876_Het_trim_bwaMEM_sort_modif.bam.generator.V2_3074_L508_D15:6:8::MH0;MQ=60;cigar=508M;SB=0.428571;AS=2-1;CVT=X;HD=14_15_15_15_14_14_14_15_15_15_15_15_15_16_16_15_15_15_15_14_13_13_12_12_12_;AO=12;VT=X	GT:DP:RO:AO	1/1:12:0:12	0/0:10:10:0	0/0:24:24:0
X	3058898	X-DeNovo	C	G	100	PASS	PH=PHASED-299-N2_SV_trim_bwaMEM_sort_modif.bam;FEX=PASS;FS=25/25;RN=NODE_KR1876_Het_trim_bwaMEM_sort_modif.bam.generator.V2_3078_L630_D27:12:13::MH0;MQ=60;cigar=630M;SB=0.48;AS=2-1;CVT=X;HD=26_26_26_24_24_24_24_23_23_23_24_24_24_23_23_24_23_24_22_22_22_22_21_19_18_;AO=18;VT=X	GT:DP:RO:AO	1/1:18:0:18	0/0:14:14:0	0/0:32:32:0
X	4638016	X-DeNovo	C	T	100	PASS	PH=none;FEX=PASS;FS=25/25;RN=NODE_KR1876_Het_trim_bwaMEM_sort_modif.bam.generator.V2_3111_L651_D19:10:9::MH0;MQ=60;cigar=651M;SB=0.526316;AS=2-1;CVT=X;HD=16_19_19_20_20_20_20_18_18_18_18_18_17_17_16_16_16_16_16_15_15_16_16_16_16_;AO=15;VT=X	GT:DP:RO:AO	1/1:15:0:15	0/0:9:9:0	0/0:22:22:0
X	5354582	X-DeNovo	C	T	100	PASS	PH=PHASED-25-N2_SV_trim_bwaMEM_sort_modif.bam;FEX=PASS;FS=25/25;RN=NODE_KR1876_Het_trim_bwaMEM_sort_modif.bam.generator.V2_3133_L559_D21:9:10::MH0;MQ=60;cigar=559M;SB=0.473684;AS=3-1;CVT=X;HD=22_20_20_19_18_18_18_18_18_20_20_21_21_20_20_21_22_22_22_23_23_23_22_22_22_;AO=18;VT=X	GT:DP:RO:AO	1/1:18:0:18	0/0:14:14:0	0/0:13:13:0
X	5386285	X-DeNovo	C	T	100	PASS	PH=PHASED-15-N2_SV_trim_bwaMEM_sort_modif.bam;FEX=PASS;FS=25/25;RN=NODE_KR1876_Het_trim_bwaMEM_sort_modif.bam.generator.V2_3134_L692_D23:10:12::MH0;MQ=60;cigar=692M;SB=0.454545;AS=4-1;CVT=X;HD=25_25_25_23_23_22_22_22_22_22_22_22_21_21_20_19_18_18_18_19_19_19_19_19_19_;AO=18;VT=X	GT:DP:RO:AO	1/1:18:0:18	0/0:12:12:0	0/0:29:29:0
X	6286178	X-DeNovo	T	C	100	PASS	PH=PHASED-50-N2_SV_trim_bwaMEM_sort_modif.bam;FEX=PASS;FS=25/25;RN=NODE_KR1876_Het_trim_bwaMEM_sort_modif.bam.generator.V2_3148_L826_D26:14:10::MH0;MQ=60;cigar=826M;SB=0.583333;AS=2-1;CVT=X;HD=24_25_25_25_24_23_23_23_23_23_24_22_23_23_23_23_23_23_23_23_21_20_20_20_20_;AO=20;VT=X	GT:DP:RO:AO	1/1:20:0:20	0/0:8:8:0	0/0:31:31:0
X	7051613	X-DeNovo	T	G	100	PASS	PH=PHASED-7-N2_SV_trim_bwaMEM_sort_modif.bam;FEX=PASS;FS=25/25;RN=NODE_KR1876_Het_trim_bwaMEM_sort_modif.bam.generator.V2_3158_L640_D28:10:17::MH0;MQ=60;cigar=640M;SB=0.37037;AS=2-1;CVT=X;HD=29_29_29_30_30_30_27_27_27_27_26_25_25_25_25_25_25_24_24_24_24_24_24_24_24_;AO=24;VT=X	GT:DP:RO:AO	1/1:24:0:24	0/0:9:9:0	0/0:24:24:0
X	7093754	X-DeNovo	C	T	100	PASS	PH=none;FEX=PASS;FS=25/25;RN=NODE_KR1876_Het_trim_bwaMEM_sort_modif.bam.generator.V2_3160_L393_D27:14:10::MH0;MQ=60;cigar=393M;SB=0.583333;AS=2-1;CVT=X;HD=24_24_24_24_23_22_22_22_20_20_20_20_20_20_21_21_21_21_23_24_24_24_25_26_26_;AO=20;VT=X	GT:DP:RO:AO	1/1:20:0:20	0/0:11:11:0	0/0:40:40:0
X	7161959	X-DeNovo	C	T	100	PASS	PH=none;FEX=PASS;FS=25/25;RN=NODE_KR1876_Het_trim_bwaMEM_sort_modif.bam.generator.V2_3162_L563_D25:11:13::MH0;MQ=60;cigar=563M;SB=0.458333;AS=2-1;CVT=X;HD=26_25_25_26_28_28_28_29_30_30_29_30_30_28_28_27_26_26_25_25_26_26_27_27_27_;AO=25;VT=X	GT:DP:RO:AO	1/1:25:0:25	0/0:8:8:0	0/0:26:26:0
X	7182166	X-DeNovo	C	T	100	PASS	PH=PHASED-5-N2_SV_trim_bwaMEM_sort_modif.bam;FEX=PASS;FS=25/25;RN=NODE_KR1876_Het_trim_bwaMEM_sort_modif.bam.generator.V2_3164_L705_D26:13:13::MH0;MQ=60;cigar=705M;SB=0.5;AS=2-1;CVT=X;HD=24_24_24_24_24_24_24_25_25_25_25_25_25_25_25_24_24_24_24_24_25_25_26_27_27_;AO=24;VT=X	GT:DP:RO:AO	1/1:24:0:24	0/0:13:13:0	0/0:32:32:0
X	7224769	X-DeNovo	G	A	100	PASS	PH=none;FEX=PASS;FS=25/25;RN=NODE_KR1876_Het_trim_bwaMEM_sort_modif.bam.generator.V2_3165_L551_D17:9:7::MH0;MQ=60;cigar=551M;SB=0.5625;AS=2-1;CVT=X;HD=18_18_18_18_18_17_17_16_16_16_16_16_16_16_16_16_16_16_13_13_14_14_14_14_13_;AO=13;VT=X	GT:DP:RO:AO	1/1:13:0:13	0/0:9:9:0	0/0:26:26:0
X	8321129	X-DeNovo	A	T	100	PASS	PH=PHASED-25-N2_SV_trim_bwaMEM_sort_modif.bam;FEX=PASS;FS=25/25;RN=NODE_KR1876_Het_trim_bwaMEM_sort_modif.bam.generator.V2_3178_L694_D25:14:10::MH0;MQ=60;cigar=694M;SB=0.583333;AS=2-1;CVT=X;HD=23_22_23_22_22_23_23_22_21_22_24_23_23_22_22_23_23_23_23_23_23_24_24_23_23_;AO=21;VT=X	GT:DP:RO:AO	1/1:21:0:21	0/0:12:12:0	0/0:28:28:0
X	8870889	X-DeNovo	C	T	100	PASS	PH=none;FEX=PASS;FS=25/25;RN=NODE_KR1876_Het_trim_bwaMEM_sort_modif.bam.generator.V2_3188_L836_D25:12:13::MH0;MQ=60;cigar=836M;SB=0.48;AS=2-1;CVT=X;HD=24_24_24_24_24_24_24_24_25_25_25_25_26_26_26_26_25_26_27_27_27_27_26_26_26_;AO=24;VT=X	GT:DP:RO:AO	1/1:24:0:24	0/0:13:13:0	0/0:30:30:0
X	8874532	X-DeNovo	C	T	4	PASS	PH=none;FEX=PASS;FS=1/25;RN=NODE_KR1876_Het_trim_bwaMEM_sort_modif.bam.generator.V2_3190_L265_D8:2:5::MH0;MQ=60;cigar=265M;SB=0.285714;AS=2-1;CVT=X;HD=-1_-1_-1_-1_-1_-1_-1_-1_-1_-1_-1_-1_-1_-1_-1_-1_-1_-1_-1_-1_-1_-1_-1_-1_9_;AO=9;VT=X	GT:DP:RO:AO	0/1:20:11:9	0/0:10:10:0	0/0:41:41:0
X	9048717	X-DeNovo	C	T	100	PASS	PH=PHASED-25-N2_SV_trim_bwaMEM_sort_modif.bam;FEX=PASS;FS=25/25;RN=NODE_KR1876_Het_trim_bwaMEM_sort_modif.bam.generator.V2_3192_L509_D20:10:10::MH0;MQ=60;cigar=509M;SB=0.5;AS=4-1;CVT=X;HD=18_18_18_18_18_18_18_18_18_16_17_17_17_18_19_19_19_19_18_18_17_17_17_16_16_;AO=16;VT=X	GT:DP:RO:AO	0/1:19:3:16	0/0:13:13:0	0/0:30:30:0
X	9343668	I-DeNovo	G	GA	100	PASS	PH=PHASED-25-N2_SV_trim_bwaMEM_sort_modif.bam;FEX=PASS;FS=16/16;RN=NODE_KR1876_Het_trim_bwaMEM_sort_modif.bam.generator.V2_3198_L672_D23:10:12::MH0;MQ=60;cigar=341M1I128M1D4M1I197M;SB=0.454545;AS=5-7;CVT=I;HD=-1_-1_-1_-1_-1_-1_-1_-1_-1_31_32_32_32_31_31_29_30_28_28_27_27_27_26_26_27_-1_;AO=26;VT=I	GT:DP:RO:AO	1/1:26:0:26	0/0:9:9:0	0/0:22:22:0
X	9420895	X-DeNovo	C	T	100	PASS	PH=none;FEX=PASS;FS=25/25;RN=NODE_KR1876_Het_trim_bwaMEM_sort_modif.bam.generator.V2_3199_L540_D26:9:15::MH0;MQ=60;cigar=540M;SB=0.375;AS=2-1;CVT=X;HD=24_25_22_22_22_22_22_23_23_23_23_22_23_23_23_24_24_23_22_21_21_21_22_20_20_;AO=20;VT=X	GT:DP:RO:AO	1/1:23:3:20	0/0:17:17:0	0/0:33:33:0
X	9644015	X-DeNovo	C	T	100	PASS	PH=none;FEX=PASS;FS=25/25;RN=NODE_KR1876_Het_trim_bwaMEM_sort_modif.bam.generator.V2_3202_L785_D31:20:10::MH0;MQ=60;cigar=785M;SB=0.666667;AS=2-1;CVT=X;HD=31_31_31_31_31_31_31_31_30_30_30_29_29_29_29_30_30_30_29_29_29_29_29_29_29_;AO=29;VT=X	GT:DP:RO:AO	1/1:32:3:29	0/0:9:9:0	0/0:18:18:0
X	9723219	X-DeNovo	C	T	100	PASS	PH=PHASED-25-N2_SV_trim_bwaMEM_sort_modif.bam;FEX=PASS;FS=25/25;RN=NODE_KR1876_Het_trim_bwaMEM_sort_modif.bam.generator.V2_3203_L317_D9:5:4::MH0;MQ=60;cigar=317M;SB=0.555556;AS=2-1;CVT=X;HD=9_9_9_9_9_9_9_9_9_9_9_9_9_9_9_9_9_9_9_9_9_9_9_9_9_;AO=9;VT=X	GT:DP:RO:AO	0/1:26:17:9	0/0:11:11:0	0/0:27:27:0
X	10342625	X-DeNovo	C	T	100	PASS	PH=PHASED-25-N2_SV_trim_bwaMEM_sort_modif.bam;FEX=PASS;FS=25/25;RN=NODE_KR1876_Het_trim_bwaMEM_sort_modif.bam.generator.V2_3211_L845_D18:8:10::MH0;MQ=60;cigar=845M;SB=0.444444;AS=2-1;CVT=X;HD=16_15_15_15_15_15_15_15_15_15_15_16_15_15_16_16_15_14_16_16_16_17_17_17_17_;AO=14;VT=X	GT:DP:RO:AO	0/1:23:9:14	0/0:12:12:0	0/0:33:33:0
X	10358687	87D-DeNovo	AAGTAAATCTAATATTTTGCACTAAAAACGTTTCAGAAATTTTTGTAACTCAAGATATATGTACAGACACCACAGTTTTAGGATTACA	A	92	PASS	PH=none;FEX=PASS;FS=23/25;RN=NODE_KR1876_Het_trim_bwaMEM_sort_modif.bam.generator.V2_3213_L524_D22:11:9::MH0;MQ=60;cigar=184M340S;SB=0.55;AS=1-2;CVT=87D;HD=20_20_20_20_20_20_20_22_22_22_22_22_22_22_21_21_21_19_18_19_20_20_20_-1_-1_-1_-1_-1_-1_-1_-1_-1_-1_-1_-1_-1_-1_-1_-1_-1_-1_-1_-1_-1_-1_-1_-1_-1_-1_-1_-1_-1_-1_-1_-1_-1_-1_-1_-1_-1_-1_-1_-1_-1_-1_-1_-1_-1_-1_-1_-1_-1_-1_-1_-1_-1_-1_-1_-1_-1_-1_…	GT:DP:RO:AO	1/1:20:2:18	0/0:8:8:0	0/0:34:34:0
X	10414795	6D-DeNovo	GATGCGA	G	95.8333	PASS	PH=PHASED-72-N2_SV_trim_bwaMEM_sort_modif.bam;FEX=PASS;FS=23/24;RN=NODE_KR1876_Het_trim_bwaMEM_sort_modif.bam.generator.V2_3217_L683_D22:9:12::MH0;MQ=60;cigar=464M6D219M;SB=0.428571;AS=2-3;CVT=6D;HD=-1_21_21_21_21_21_21_21_21_21_21_21_19_19_20_20_21_21_22_23_23_23_22_22_-1_-1_-1_-1_-1_-1_-1_;AO=19;VT=DDDDDD	GT:DP:RO:AO	1/1:19:0:19	0/0:9:9:0	0/0:31:31:0
X	10977001	X-DeNovo	C	T	100	PASS	PH=PHASED-16-N2_SV_trim_bwaMEM_sort_modif.bam;FEX=PASS;FS=25/25;RN=NODE_KR1876_Het_trim_bwaMEM_sort_modif.bam.generator.V2_3229_L548_D19:8:11::MH0;MQ=60;cigar=548M;SB=0.421053;AS=2-1;CVT=X;HD=16_15_15_15_13_13_13_13_12_12_12_12_12_14_14_15_15_15_15_15_16_17_17_17_17_;AO=12;VT=X	GT:DP:RO:AO	0/1:16:4:12	0/0:16:16:0	0/0:29:29:0
X	11474155	X-DeNovo	C	T	100	PASS	PH=none;FEX=PASS;FS=25/25;RN=NODE_KR1876_Het_trim_bwaMEM_sort_modif.bam.generator.V2_3234_L542_D26:15:11::MH0;MQ=60;cigar=542M;SB=0.576923;AS=4-1;CVT=X;HD=23_23_24_24_24_25_25_25_25_25_25_26_26_26_25_25_26_28_30_30_29_28_28_28_29_;AO=23;VT=X	GT:DP:RO:AO	1/1:27:4:23	0/0:10:10:0	0/0:34:34:0
X	11978508	X-DeNovo	A	T	72	PASS	PH=none;FEX=PASS;FS=18/25;RN=NODE_KR1876_Het_trim_bwaMEM_sort_modif.bam.generator.V2_3244_L372_D17:3:10::MH0;MQ=55;cigar=286M1D86M;SB=0.230769;AS=4-3;CVT=X;HD=13_13_-1_-1_-1_-1_-1_-1_15_14_14_14_14_14_14_13_13_13_12_12_12_11_11_11_-1_;AO=11;VT=X	GT:DP:RO:AO	0/1:27:16:11	0/0:20:20:0	0/0:211:211:0
X	11992452	X-DeNovo	T	C	100	PASS	PH=PHASED-17-N2_SV_trim_bwaMEM_sort_modif.bam;FEX=PASS;FS=25/25;RN=NODE_KR1876_Het_trim_bwaMEM_sort_modif.bam.generator.V2_3245_L629_D24:9:13::MH0;MQ=60;cigar=629M;SB=0.409091;AS=3-1;CVT=X;HD=22_20_22_22_22_22_22_22_22_22_22_22_23_23_23_23_23_23_24_24_25_25_26_26_26_;AO=20;VT=X	GT:DP:RO:AO	1/1:23:3:20	0/0:9:9:0	0/0:30:30:0
X	14174418	X-DeNovo	G	A	100	PASS	PH=PHASED-204-N2_SV_trim_bwaMEM_sort_modif.bam;FEX=PASS;FS=25/25;RN=NODE_KR1876_Het_trim_bwaMEM_sort_modif.bam.generator.V2_3288_L689_D20:7:11::MH0;MQ=60;cigar=689M;SB=0.388889;AS=3-1;CVT=X;HD=18_18_18_18_19_18_19_19_18_18_18_17_17_15_14_14_14_14_15_16_16_16_14_14_14_;AO=14;VT=X	GT:DP:RO:AO	1/1:16:2:14	0/0:10:10:0	0/0:20:20:0
X	14748181	X-DeNovo	G	A	100	PASS	PH=PHASED-25-N2_SV_trim_bwaMEM_sort_modif.bam;FEX=PASS;FS=25/25;RN=NODE_KR1876_Het_trim_bwaMEM_sort_modif.bam.generator.V2_3305_L600_D25:14:11::MH0;MQ=60;cigar=600M;SB=0.56;AS=2-1;CVT=X;HD=22_22_23_23_23_22_22_21_21_21_20_21_21_22_22_23_21_20_20_20_20_20_19_19_20_;AO=19;VT=X	GT:DP:RO:AO	0/1:23:4:19	0/0:13:13:0	0/0:17:17:0
X	14989697	X-DeNovo	C	T	100	PASS	PH=PHASED-60-N2_SV_trim_bwaMEM_sort_modif.bam;FEX=PASS;FS=25/25;RN=NODE_KR1876_Het_trim_bwaMEM_sort_modif.bam.generator.V2_3313_L584_D25:15:10::MH0;MQ=60;cigar=584M;SB=0.6;AS=2-1;CVT=X;HD=20_20_21_21_21_22_22_23_22_22_22_22_22_21_22_21_22_22_23_23_23_23_24_25_25_;AO=20;VT=X	GT:DP:RO:AO	1/1:22:2:20	0/0:8:8:0	0/0:31:31:0
X	15625131	X-DeNovo	C	T	100	PASS	PH=none;FEX=PASS;FS=25/25;RN=NODE_KR1876_Het_trim_bwaMEM_sort_modif.bam.generator.V2_3340_L625_D29:17:12::MH0;MQ=60;cigar=625M;SB=0.586207;AS=2-1;CVT=X;HD=28_28_28_28_29_28_28_29_29_29_29_28_29_30_30_29_29_29_29_29_29_29_29_29_29_;AO=28;VT=X	GT:DP:RO:AO	1/1:30:2:28	0/0:23:23:0	0/0:44:44:0
X	15979274	X-DeNovo	C	T	20	PASS	PH=PHASED-25-N2_SV_trim_bwaMEM_sort_modif.bam;FEX=PASS;FS=5/25;RN=NODE_KR1876_Het_trim_bwaMEM_sort_modif.bam.generator.V2_3348_L508_D28:14:14::MH0;MQ=60;cigar=508M;SB=0.5;AS=3-1;CVT=X;HD=-1_-1_-1_-1_-1_-1_-1_-1_-1_-1_-1_-1_-1_-1_-1_-1_-1_-1_-1_-1_25_25_25_25_25_;AO=25;VT=X	GT:DP:RO:AO	0/1:31:6:25	0/0:12:12:0	0/0:29:29:0
X	16021555	X-DeNovo	C	T	100	PASS	PH=PHASED-64-N2_SV_trim_bwaMEM_sort_modif.bam;FEX=PASS;FS=25/25;RN=NODE_KR1876_Het_trim_bwaMEM_sort_modif.bam.generator.V2_3349_L451_D24:12:12::MH0;MQ=60;cigar=451M;SB=0.5;AS=2-1;CVT=X;HD=22_23_24_24_24_24_23_23_23_23_21_21_22_22_23_23_23_24_24_25_24_24_23_23_23_;AO=21;VT=X	GT:DP:RO:AO	0/1:26:5:21	0/0:17:17:0	0/0:35:35:0
X	16894242	X-DeNovo	C	T	100	PASS	PH=none;FEX=PASS;FS=25/25;RN=NODE_KR1876_Het_trim_bwaMEM_sort_modif.bam.generator.V2_3365_L649_D25:10:14::MH0;MQ=60;cigar=649M;SB=0.416667;AS=2-1;CVT=X;HD=27_26_26_25_25_25_25_25_23_23_25_25_25_25_25_26_26_26_26_25_25_25_25_25_25_;AO=23;VT=X	GT:DP:RO:AO	0/1:28:5:23	0/0:12:12:0	0/0:17:17:0
X	16896551	X-DeNovo	G	T	100	PASS	PH=PHASED-42-N2_SV_trim_bwaMEM_sort_modif.bam;FEX=PASS;FS=25/25;RN=NODE_KR1876_Het_trim_bwaMEM_sort_modif.bam.generator.V2_3366_L892_D23:10:12::MH0;MQ=60;cigar=892M;SB=0.454545;AS=2-1;CVT=X;HD=20_20_20_21_20_20_20_20_20_19_20_20_23_22_22_23_23_24_24_25_26_25_26_26_26_;AO=19;VT=X	GT:DP:RO:AO	1/1:22:3:19	0/0:10:10:0	0/0:20:20:0
X	17038520	X-DeNovo	C	T	100	PASS	PH=none;FEX=PASS;FS=25/25;RN=NODE_KR1876_Het_trim_bwaMEM_sort_modif.bam.generator.V2_3369_L563_D16:7:9::MH0;MQ=60;cigar=563M;SB=0.4375;AS=2-1;CVT=X;HD=16_16_17_16_16_15_15_15_14_15_15_14_14_15_15_15_15_15_14_14_14_14_14_13_13_;AO=13;VT=X	GT:DP:RO:AO	0/1:19:6:13	0/0:10:10:0	0/0:24:24:0
X	17276237	X-DeNovo	C	T	100	PASS	PH=none;FEX=PASS;FS=25/25;RN=NODE_KR1876_Het_trim_bwaMEM_sort_modif.bam.generator.V2_3373_L627_D14:6:8::MH0;MQ=60;cigar=627M;SB=0.428571;AS=2-1;CVT=X;HD=14_14_14_13_13_13_13_13_13_13_13_13_13_13_13_13_13_13_12_12_12_12_12_12_12_;AO=12;VT=X	GT:DP:RO:AO	1/1:14:2:12	0/0:13:13:0	0/0:30:30:0
X	17353625	X-DeNovo	C	T	100	PASS	PH=none;FEX=PASS;FS=25/25;RN=NODE_KR1876_Het_trim_bwaMEM_sort_modif.bam.generator.V2_3377_L539_D18:12:5::MH0;MQ=60;cigar=539M;SB=0.705882;AS=2-1;CVT=X;HD=17_17_20_21_21_19_19_18_18_18_18_18_17_17_16_16_16_18_18_18_18_18_18_18_18_;AO=16;VT=X	GT:DP:RO:AO	1/1:18:2:16	0/0:11:11:0	0/0:35:35:0
X	17462173	X-DeNovo	C	T	100	PASS	PH=none;FEX=PASS;FS=25/25;RN=NODE_KR1876_Het_trim_bwaMEM_sort_modif.bam.generator.V2_3381_L449_D18:8:7::MH0;MQ=60;cigar=449M;SB=0.533333;AS=2-1;CVT=X;HD=15_14_15_15_15_15_15_15_15_15_17_17_17_18_18_18_18_17_17_17_17_17_17_17_17_;AO=14;VT=X	GT:DP:RO:AO	0/1:17:3:14	0/0:13:13:0	0/0:35:35:0
